# Supplementary material for: Micranthanosides I and II, two novel 1,10-secograyanane diterpenoids and their antinociceptive analogues from the leaves and twigs of Rhododendron micranthum
Source: Royal Society of Chemistry journal article supplement (doi:10.1039/c9ra01736d), 2019-01-01
Supplement: c9ra01736d1.pdf [file c9ra01736d1.pdf]

Micranthuosides I and II, two novel 1,10-secograyanane  
diterpenoids and their analogues from the leaves and  
twigs of *Rhododendron micranthum*

*Yuxun Zhu,<sup>a</sup> Huimin Yan,<sup>a</sup> Xiaojing Wang, Zhaoxin Zhang, Huanping Zhang, Lisha  
Chai, Li Li, Jing Qu, and Yong Li\**

†State Key Laboratory of Bioactive Substance and Function of Natural Medicines,  
Institute of Materia Medica, Chinese Academy of Medical Sciences and Peking Union  
Medical College, Beijing 100050, China

**Electronic supplementary information**

# List of Contents

## Attached spectra

### 1. The IR, HRESIMS, and NMR spectra of 1

|                                                            |     |
|------------------------------------------------------------|-----|
| The IR spectrum of 1-----                                  | S7  |
| (+)-HRESIMS data of 1-----                                 | S8  |
| The <sup>1</sup> H NMR spectrum of 1-----                  | S9  |
| The <sup>13</sup> C NMR spectrum of 1-----                 | S10 |
| The DEPT spectrum of 1-----                                | S11 |
| The <sup>1</sup> H- <sup>1</sup> H COSY spectrum of 1----- | S12 |
| The HSQC spectrum of 1-----                                | S13 |
| The HMBC spectrum of 1-----                                | S14 |
| The NOESY spectrum of 1-----                               | S16 |

### 2. The IR, HRESIMS, and NMR spectra of 2

|                                                            |     |
|------------------------------------------------------------|-----|
| The IR spectrum of 2-----                                  | S17 |
| (+)-HRESIMS data of 2-----                                 | S18 |
| The <sup>1</sup> H NMR spectrum of 2-----                  | S19 |
| The <sup>13</sup> C NMR spectrum of 2-----                 | S20 |
| The DEPT spectrum of 2-----                                | S21 |
| The <sup>1</sup> H- <sup>1</sup> H COSY spectrum of 2----- | S22 |
| The HSQC spectrum of 2-----                                | S23 |
| The HMBC spectrum of 2-----                                | S24 |
| The NOESY spectrum of 2-----                               | S26 |

### 3. The IR, HRESIMS, and NMR spectra of 3

|                                                            |     |
|------------------------------------------------------------|-----|
| The IR spectrum of 3-----                                  | S27 |
| (+)-HRESIMS data of 3-----                                 | S28 |
| The <sup>1</sup> H NMR spectrum of 3-----                  | S29 |
| The <sup>13</sup> C NMR spectrum of 3-----                 | S30 |
| The DEPT spectrum of 3-----                                | S31 |
| The <sup>1</sup> H- <sup>1</sup> H COSY spectrum of 3----- | S32 |
| The HSQC spectrum of 3-----                                | S33 |
| The HMBC spectrum of 3-----                                | S34 |
| The NOESY spectrum of 3-----                               | S36 |

### 4. The IR, HRESIMS, and NMR spectra of 4

|                                           |     |
|-------------------------------------------|-----|
| The IR spectrum of 4-----                 | S37 |
| (+)-HRESIMS data of 4-----                | S38 |
| The <sup>1</sup> H NMR spectrum of 4----- | S39 |

|                                                                 |     |
|-----------------------------------------------------------------|-----|
| The $^{13}\text{C}$ NMR spectrum of <b>4</b> -----              | S40 |
| The DEPT spectrum of <b>4</b> -----                             | S41 |
| The $^1\text{H}$ - $^1\text{H}$ COSY spectrum of <b>4</b> ----- | S42 |
| The HSQC spectrum of <b>4</b> -----                             | S43 |
| The HMBC spectrum of <b>4</b> -----                             | S44 |
| The NOESY spectrum of <b>4</b> -----                            | S46 |
| <b>5. The IR, HRESIMS, and NMR spectra of 5</b>                 |     |
| The IR spectrum of <b>5</b> -----                               | S47 |
| (+)-HRESIMS data of <b>5</b> -----                              | S48 |
| The $^1\text{H}$ NMR spectrum of <b>5</b> -----                 | S49 |
| The $^{13}\text{C}$ NMR spectrum of <b>5</b> -----              | S50 |
| The DEPT spectrum of <b>5</b> -----                             | S51 |
| The HSQC spectrum of <b>5</b> -----                             | S52 |
| The HMBC spectrum of <b>5</b> -----                             | S53 |
| The NOESY spectrum of <b>5</b> -----                            | S55 |
| <b>6. The IR, HRESIMS, and NMR spectra of 6</b>                 |     |
| The IR spectrum of <b>6</b> -----                               | S56 |
| (+)-HRESIMS data of <b>6</b> -----                              | S57 |
| The $^1\text{H}$ NMR spectrum of <b>6</b> -----                 | S58 |
| The $^{13}\text{C}$ NMR spectrum of <b>6</b> -----              | S59 |
| The DEPT spectrum of <b>6</b> -----                             | S60 |
| The HSQC spectrum of <b>6</b> -----                             | S61 |
| The HMBC spectrum of <b>6</b> -----                             | S62 |
| The NOESY spectrum of <b>6</b> -----                            | S64 |
| <b>7. The IR, HRESIMS, and NMR spectra of 7</b>                 |     |
| The IR spectrum of <b>7</b> -----                               | S65 |
| (+)-HRESIMS data of <b>7</b> -----                              | S66 |
| The $^1\text{H}$ NMR spectrum of <b>7</b> -----                 | S67 |
| The $^{13}\text{C}$ NMR spectrum of <b>7</b> -----              | S68 |
| The $^1\text{H}$ - $^1\text{H}$ COSY spectrum of <b>7</b> ----- | S69 |
| The HSQC spectrum of <b>7</b> -----                             | S70 |
| The HMBC spectrum of <b>7</b> -----                             | S71 |
| The NOESY spectrum of <b>7</b> -----                            | S73 |
| <b>8. The IR, HRESIMS, and NMR spectra of 8</b>                 |     |
| The IR spectrum of <b>8</b> -----                               | S74 |
| (+)-HRESIMS data of <b>8</b> -----                              | S75 |
| The $^1\text{H}$ NMR spectrum of <b>8</b> -----                 | S76 |
| The $^{13}\text{C}$ NMR spectrum of <b>8</b> -----              | S77 |

|                                                                     |      |
|---------------------------------------------------------------------|------|
| The DEPT spectrum of <b>8</b> -----                                 | S78  |
| The <sup>1</sup> H- <sup>1</sup> H COSY spectrum of <b>8</b> -----  | S79  |
| The HSQC spectrum of <b>8</b> -----                                 | S80  |
| The HMBC spectrum of <b>8</b> -----                                 | S81  |
| The NOESY spectrum of <b>8</b> -----                                | S83  |
| <b>9. The IR, HRESIMS, and NMR spectra of 9</b>                     |      |
| The IR spectrum of <b>9</b> -----                                   | S84  |
| (+)-HRESIMS data of <b>9</b> -----                                  | S85  |
| The <sup>1</sup> H NMR spectrum of <b>9</b> -----                   | S86  |
| The <sup>13</sup> C NMR spectrum of <b>9</b> -----                  | S87  |
| The DEPT spectrum of <b>9</b> -----                                 | S88  |
| The HSQC spectrum of <b>9</b> -----                                 | S89  |
| The HMBC spectrum of <b>9</b> -----                                 | S90  |
| The NOESY spectrum of <b>9</b> -----                                | S92  |
| <b>10. The IR, HRESIMS, and NMR spectra of 10</b>                   |      |
| The IR spectrum of <b>10</b> -----                                  | S93  |
| (+)-HRESIMS data of <b>10</b> -----                                 | S94  |
| The <sup>1</sup> H NMR spectrum of <b>10</b> -----                  | S95  |
| The <sup>13</sup> C NMR spectrum of <b>10</b> -----                 | S96  |
| The DEPT spectrum of <b>10</b> -----                                | S97  |
| The <sup>1</sup> H- <sup>1</sup> H COSY spectrum of <b>10</b> ----- | S98  |
| The HSQC spectrum of <b>10</b> -----                                | S99  |
| The HMBC spectrum of <b>10</b> -----                                | S100 |
| The NOESY spectrum of <b>10</b> -----                               | S102 |
| <b>11. The IR, HRESIMS, and NMR spectra of 11</b>                   |      |
| The IR spectrum of <b>11</b> -----                                  | S103 |
| (+)-HRESIMS data of <b>11</b> -----                                 | S104 |
| The <sup>1</sup> H NMR spectrum of <b>11</b> -----                  | S105 |
| The <sup>13</sup> C NMR spectrum of <b>11</b> -----                 | S106 |
| The DEPT spectrum of <b>11</b> -----                                | S107 |
| The <sup>1</sup> H- <sup>1</sup> H COSY spectrum of <b>11</b> ----- | S108 |
| The HSQC spectrum of <b>11</b> -----                                | S109 |
| The HMBC spectrum of <b>11</b> -----                                | S110 |
| The NOESY spectrum of <b>11</b> -----                               | S112 |
| <b>12. The IR, HRESIMS, and NMR spectra of 12</b>                   |      |
| The IR spectrum of <b>12</b> -----                                  | S113 |
| (+)-HRESIMS data of <b>12</b> -----                                 | S114 |
| The <sup>1</sup> H NMR spectrum of <b>12</b> -----                  | S115 |
| The <sup>13</sup> C NMR spectrum of <b>12</b> -----                 | S116 |

|                                                                     |      |
|---------------------------------------------------------------------|------|
| The DEPT spectrum of <b>12</b> -----                                | S117 |
| The <sup>1</sup> H- <sup>1</sup> H COSY spectrum of <b>12</b> ----- | S118 |
| The HSQC spectrum of <b>12</b> -----                                | S119 |
| The HMBC spectrum of <b>12</b> -----                                | S120 |
| The NOESY spectrum of <b>12</b> -----                               | S121 |
| <b>13. The IR, HRESIMS, and NMR spectra of 13</b>                   |      |
| The IR spectrum of <b>13</b> -----                                  | S122 |
| (+)-HRESIMS data of <b>13</b> -----                                 | S123 |
| The <sup>1</sup> H NMR spectrum of <b>13</b> -----                  | S124 |
| The <sup>13</sup> C NMR spectrum of <b>13</b> -----                 | S125 |
| The <sup>1</sup> H- <sup>1</sup> H COSY spectrum of <b>13</b> ----- | S126 |
| The HSQC spectrum of <b>13</b> -----                                | S127 |
| The HMBC spectrum of <b>13</b> -----                                | S128 |
| The NOESY spectrum of <b>13</b> -----                               | S130 |
| <b>14. The IR, HRESIMS, and NMR spectra of 14</b>                   |      |
| The IR spectrum of <b>14</b> -----                                  | S131 |
| (+)-HRESIMS data of <b>14</b> -----                                 | S132 |
| The <sup>1</sup> H NMR spectrum of <b>14</b> -----                  | S133 |
| The <sup>13</sup> C NMR spectrum of <b>14</b> -----                 | S134 |
| The DEPT spectrum of <b>14</b> -----                                | S135 |
| The <sup>1</sup> H- <sup>1</sup> H COSY spectrum of <b>13</b> ----- | S136 |
| The HSQC spectrum of <b>14</b> -----                                | S137 |
| The HMBC spectrum of <b>14</b> -----                                | S138 |
| The NOESY spectrum of <b>14</b> -----                               | S140 |
| <b>15. The IR, HRESIMS, and NMR spectra of 15</b>                   |      |
| The IR spectrum of <b>15</b> -----                                  | S141 |
| (+)-HRESIMS data of <b>15</b> -----                                 | S142 |
| The <sup>1</sup> H NMR spectrum of <b>15</b> -----                  | S143 |
| The <sup>13</sup> C NMR spectrum of <b>15</b> -----                 | S144 |
| The <sup>1</sup> H- <sup>1</sup> H COSY spectrum of <b>15</b> ----- | S145 |
| The HSQC spectrum of <b>15</b> -----                                | S146 |
| The HMBC spectrum of <b>15</b> -----                                | S147 |
| The NOESY spectrum of <b>15</b> -----                               | S149 |
| <b>GC analysis of the sugar moiety</b>                              |      |
| Standard <sub>D</sub> -glucose-----                                 | S150 |
| Standard <sub>L</sub> -glucose-----                                 | S151 |
| Compound <b>1</b> -----                                             | S152 |
| Compound <b>2</b> -----                                             | S153 |

|             |      |
|-------------|------|
| Compound 3  | S154 |
| Compound 4  | S155 |
| Compound 5  | S156 |
| Compound 6  | S157 |
| Compound 9  | S158 |
| Compound 10 | S159 |
| Compound 13 | S160 |
| Compound 14 | S161 |
| Compound 15 | S162 |

**CD spectra of compounds 1, 2, 12, and 15**

|             |      |
|-------------|------|
| Compound 1  | S163 |
| Compound 2  | S164 |
| Compound 12 | S165 |
| Compound 15 | S166 |

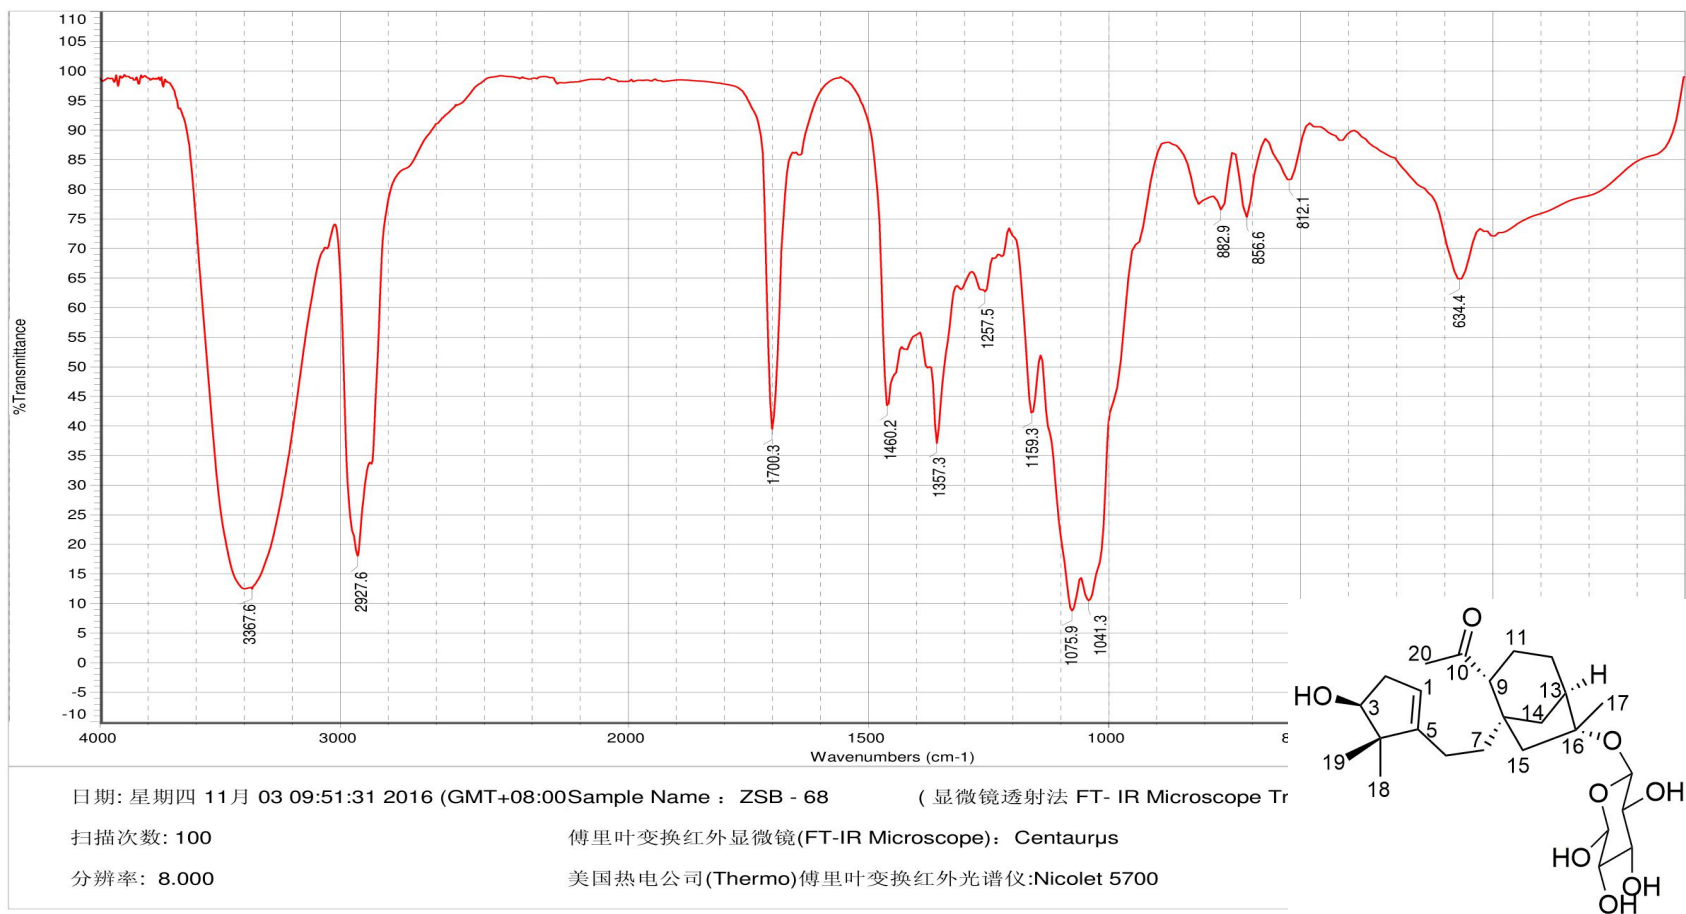

The IR spectrum of 1

MS Formula Results: + Scan (6.414 min) Sub (2015102206.d)

| m/z      | Ion                 | Formula                                          | Abundance |
|----------|---------------------|--------------------------------------------------|-----------|
| 505.2786 | (M+Na) <sup>+</sup> | C <sub>26</sub> H <sub>42</sub> NaO <sub>8</sub> | 1400111.6 |

  

| Best                                | Formula (M)                                                     | Ion Formula                                                       | Score | Cross Sco | Mass     | Calc Mass | Calc m/z | Diff (ppm) | Abs Diff (ppm) | Mass Match | Abund Match | Spacing Match | DBE |
|-------------------------------------|-----------------------------------------------------------------|-------------------------------------------------------------------|-------|-----------|----------|-----------|----------|------------|----------------|------------|-------------|---------------|-----|
| <input checked="" type="checkbox"/> | C <sub>26</sub> H <sub>42</sub> O <sub>8</sub>                  | C <sub>26</sub> H <sub>42</sub> NaO <sub>8</sub>                  | 99.78 |           | 482.2893 | 482.288   | 505.2772 | -2.83      | 2.83           | 99.75      | 99.67       | 99.98         | 6   |
| <input type="checkbox"/>            | C <sub>27</sub> H <sub>38</sub> N <sub>4</sub> O <sub>4</sub>   | C <sub>27</sub> H <sub>38</sub> N <sub>4</sub> NaO <sub>4</sub>   | 99.96 |           | 482.2893 | 482.2893  | 505.2785 | -0.07      | 0.07           | 100        | 99.89       | 99.99         | 11  |
| <input type="checkbox"/>            | C <sub>23</sub> H <sub>46</sub> O <sub>8</sub> S                | C <sub>23</sub> H <sub>46</sub> NaO <sub>8</sub> S                | 98.54 |           | 482.2893 | 482.2913  | 505.2806 | 4.15       | 4.15           | 99.46      | 96.03       | 99.7          | 1   |
| <input type="checkbox"/>            | C <sub>19</sub> H <sub>42</sub> N <sub>6</sub> O <sub>6</sub> S | C <sub>19</sub> H <sub>42</sub> N <sub>6</sub> NaO <sub>6</sub> S | 98.28 |           | 482.2894 | 482.2887  | 505.2779 | -1.45      | 1.45           | 99.93      | 94.49       | 99.53         | 2   |
| <input type="checkbox"/>            | C <sub>27</sub> H <sub>46</sub> O <sub>3</sub> S <sub>2</sub>   | C <sub>27</sub> H <sub>46</sub> NaO <sub>3</sub> S <sub>2</sub>   | 97.8  |           | 482.2893 | 482.2888  | 505.2781 | -1.04      | 1.04           | 99.97      | 92.82       | 99.45         | 5   |

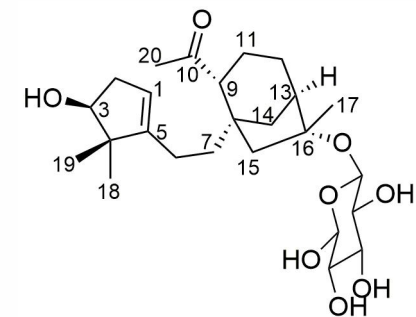

page 1

The HRESIMS spectrum of 1



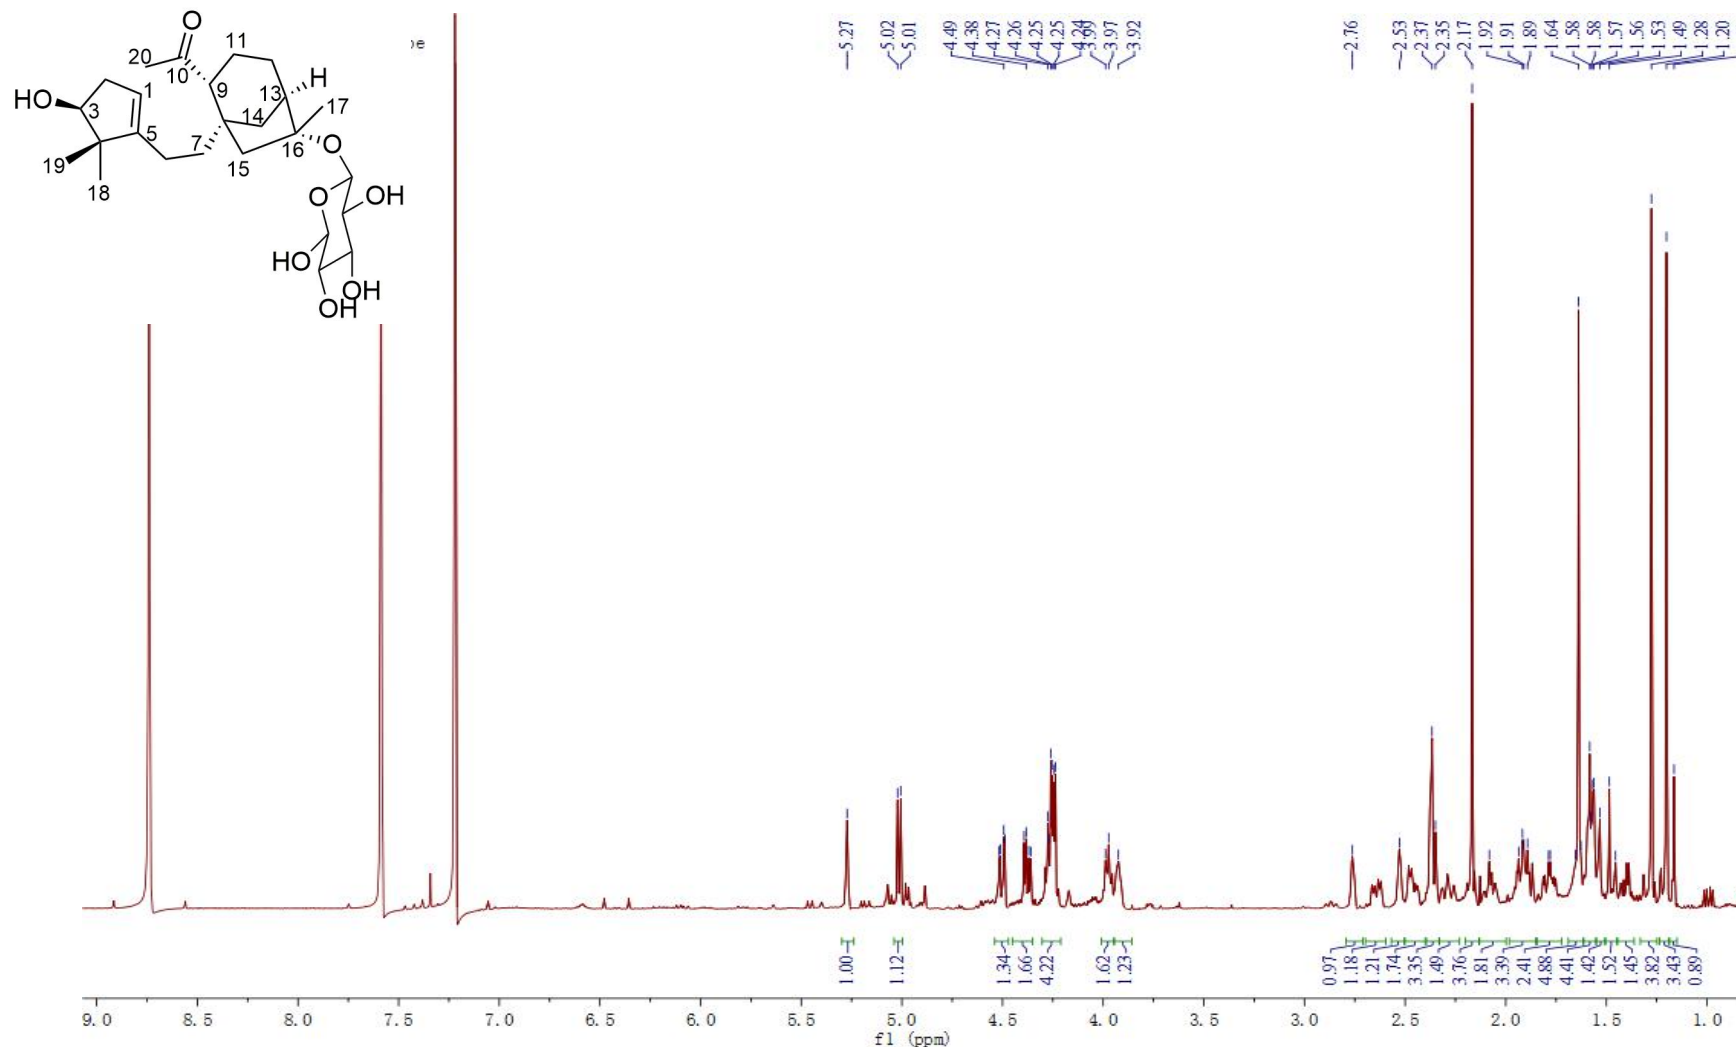

The  $^1\text{H}$  NMR spectrum of **1** in  $\text{C}_5\text{D}_5\text{N}$  (500 MHz)

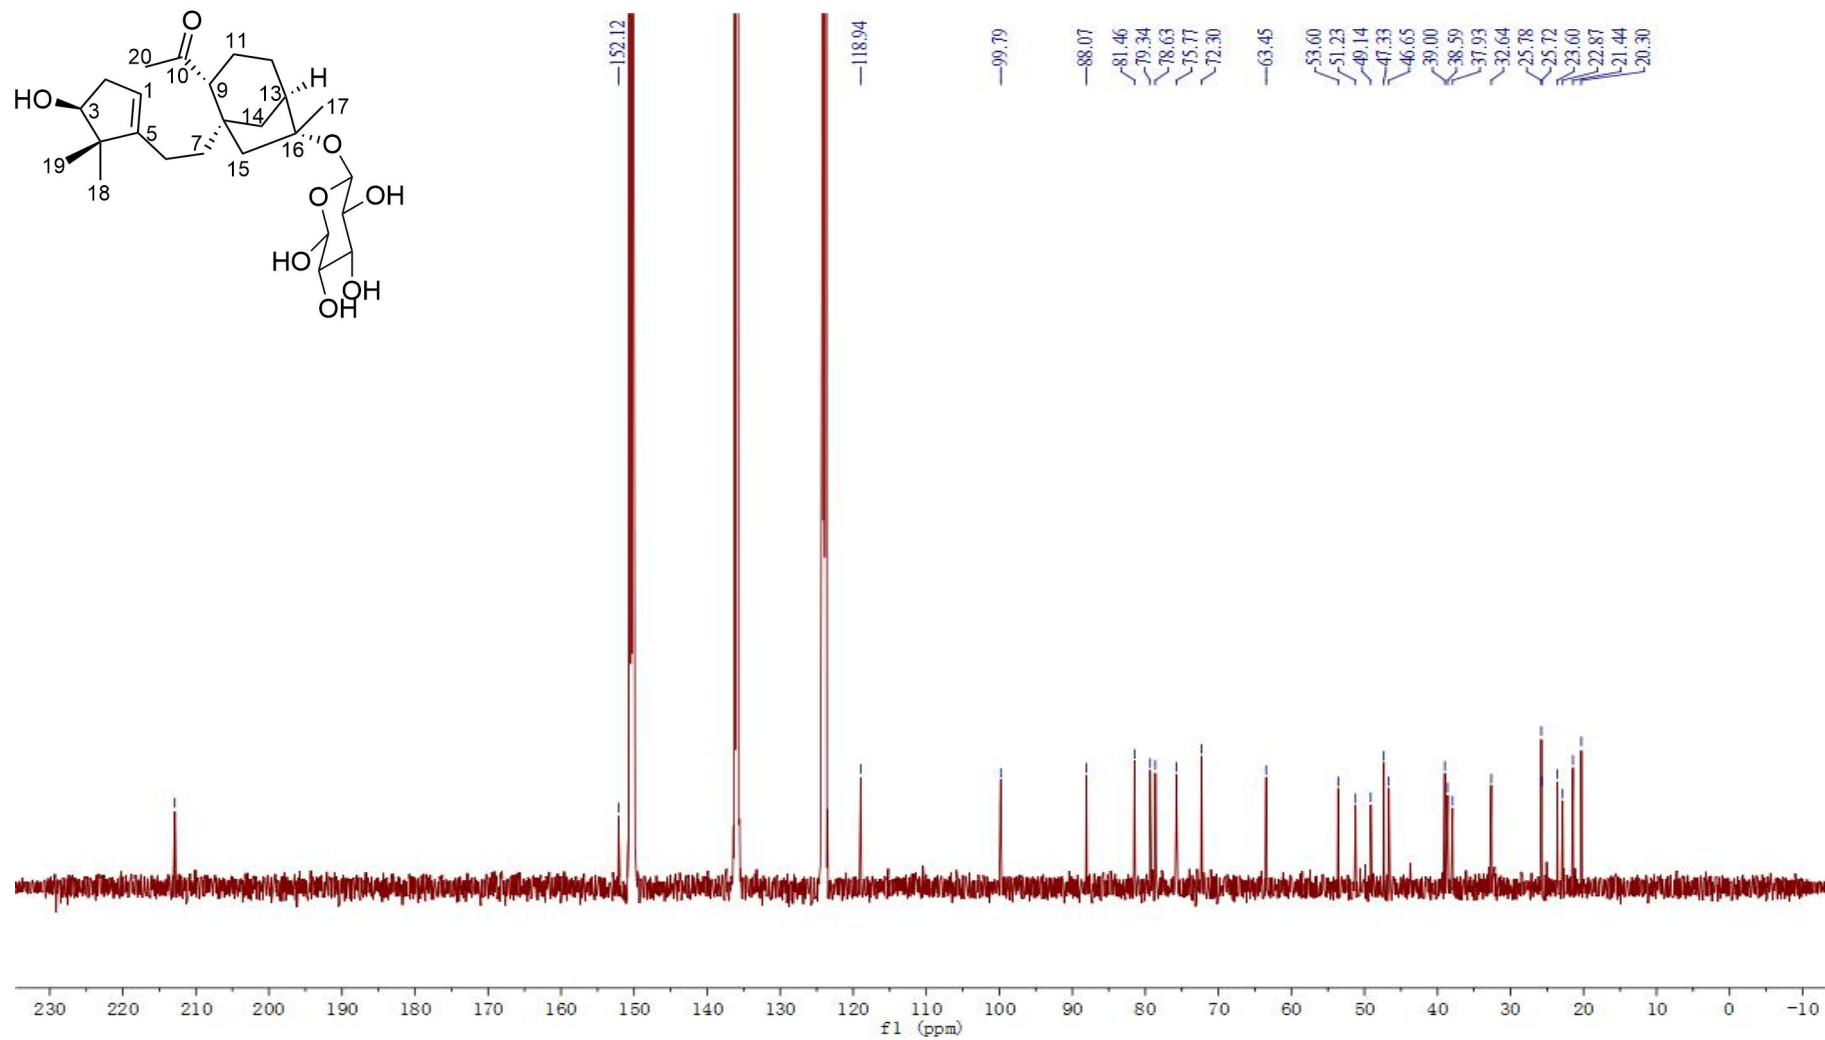

The  $^{13}\text{C}$  NMR spectrum of **1** in  $\text{C}_5\text{D}_5\text{N}$  (125 MHz)

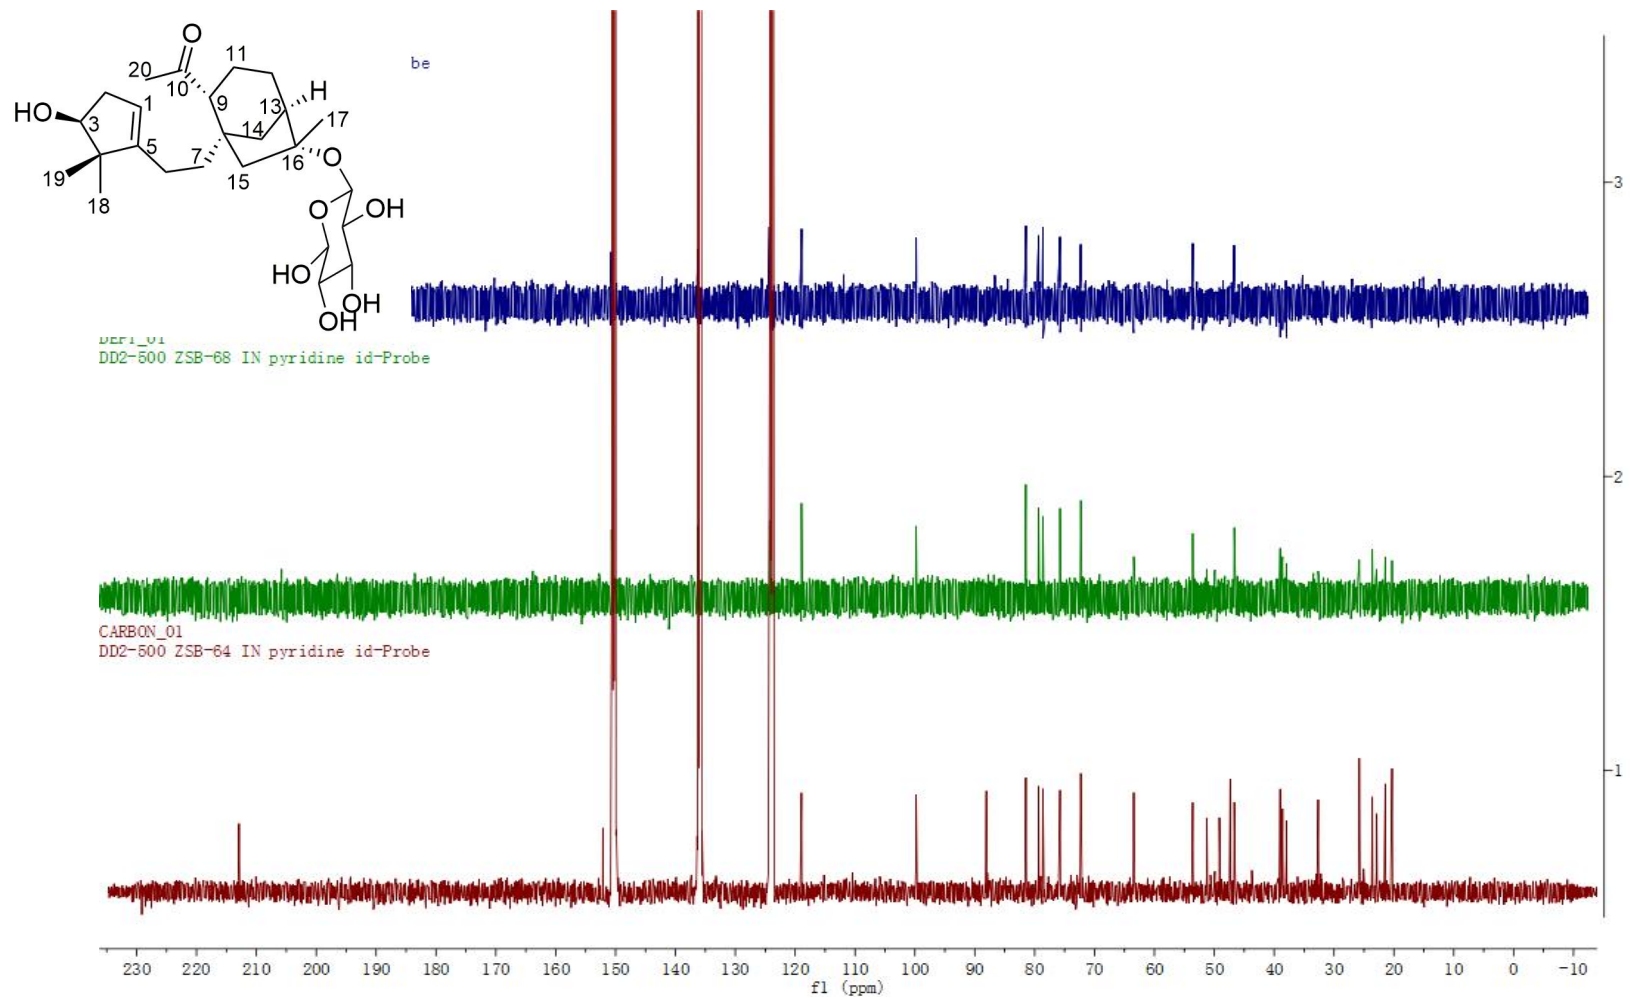

The DEPT spectrum of **1** in C<sub>5</sub>D<sub>5</sub>N (125 MHz)

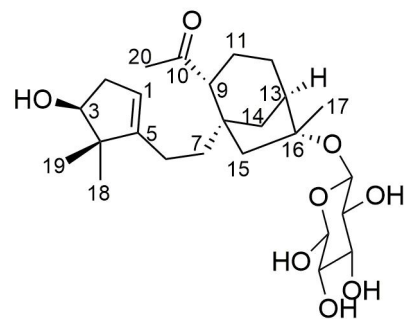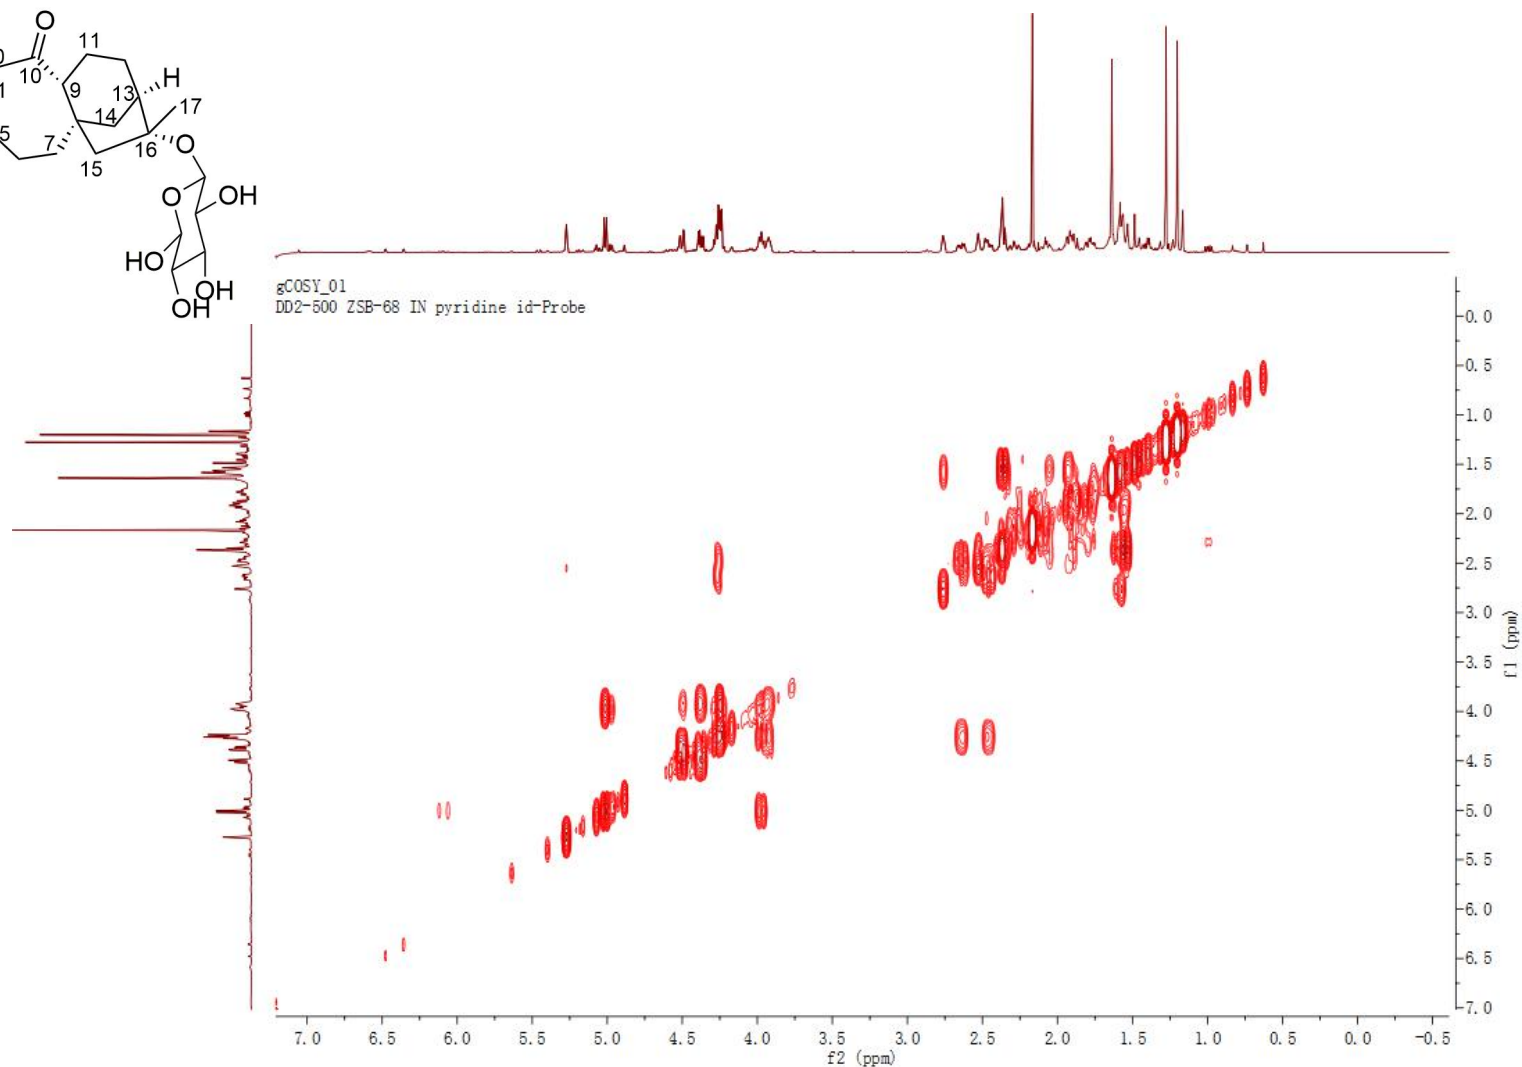

The COSY spectrum of **1** in  $C_5D_5N$  (500 MHz)

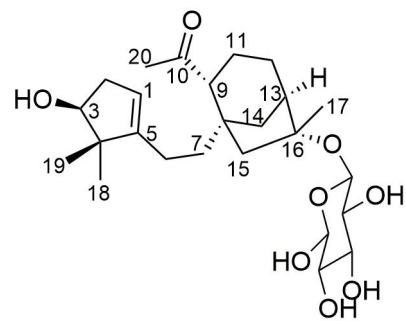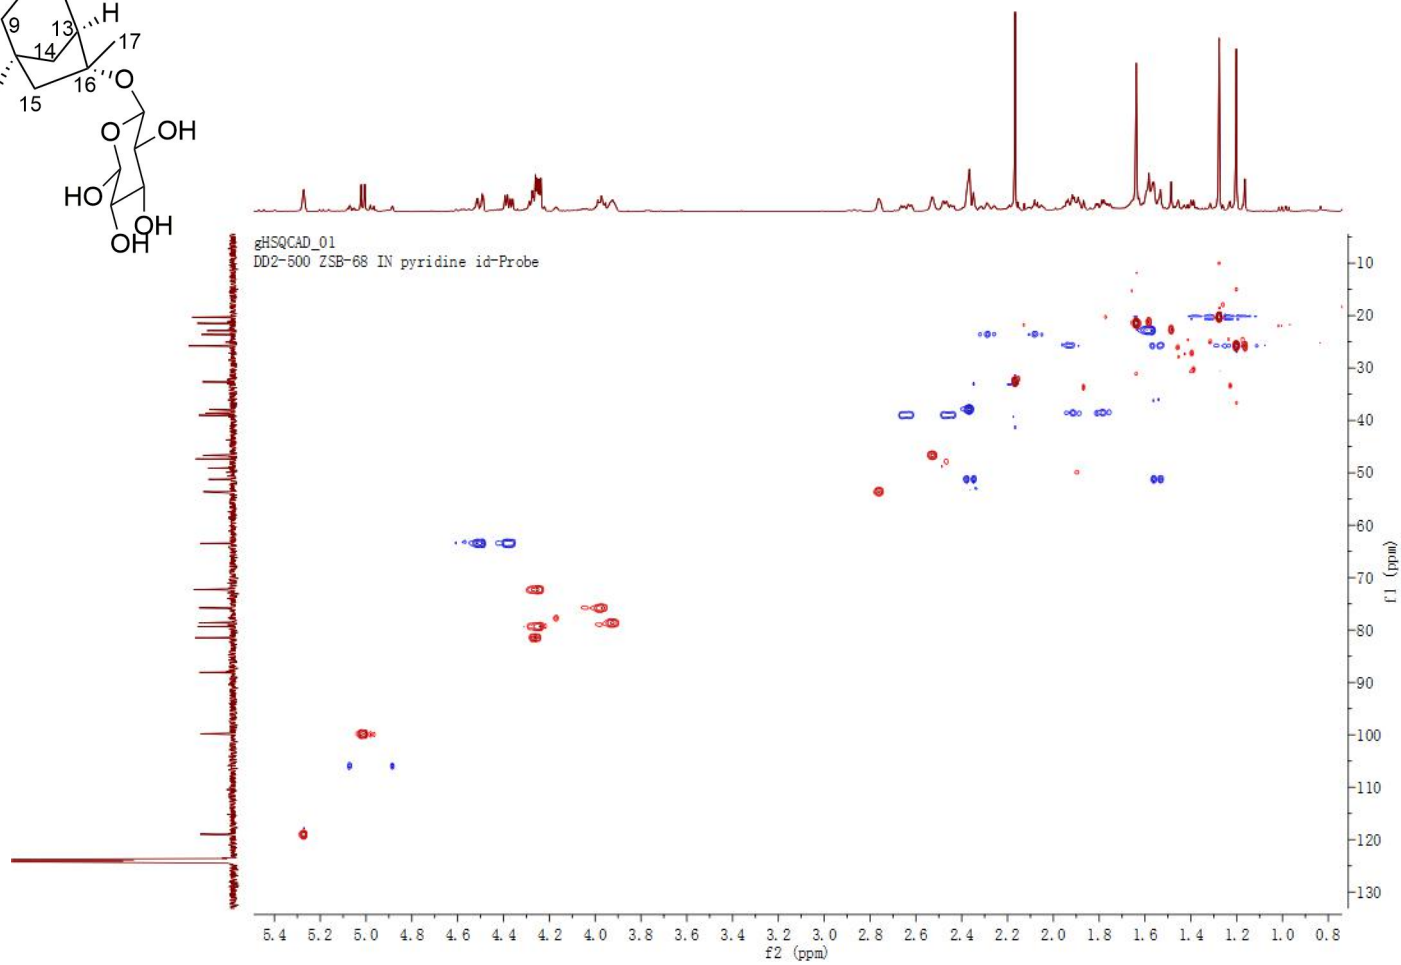

The HSQC of **1** in  $C_5D_5N$  ( $^1H$ : 500 MHz,  $^{13}C$ : 125 MHz)



gHMBCAD\_01  
DD2-500 ZSB-68 IN pyridine id-Probe

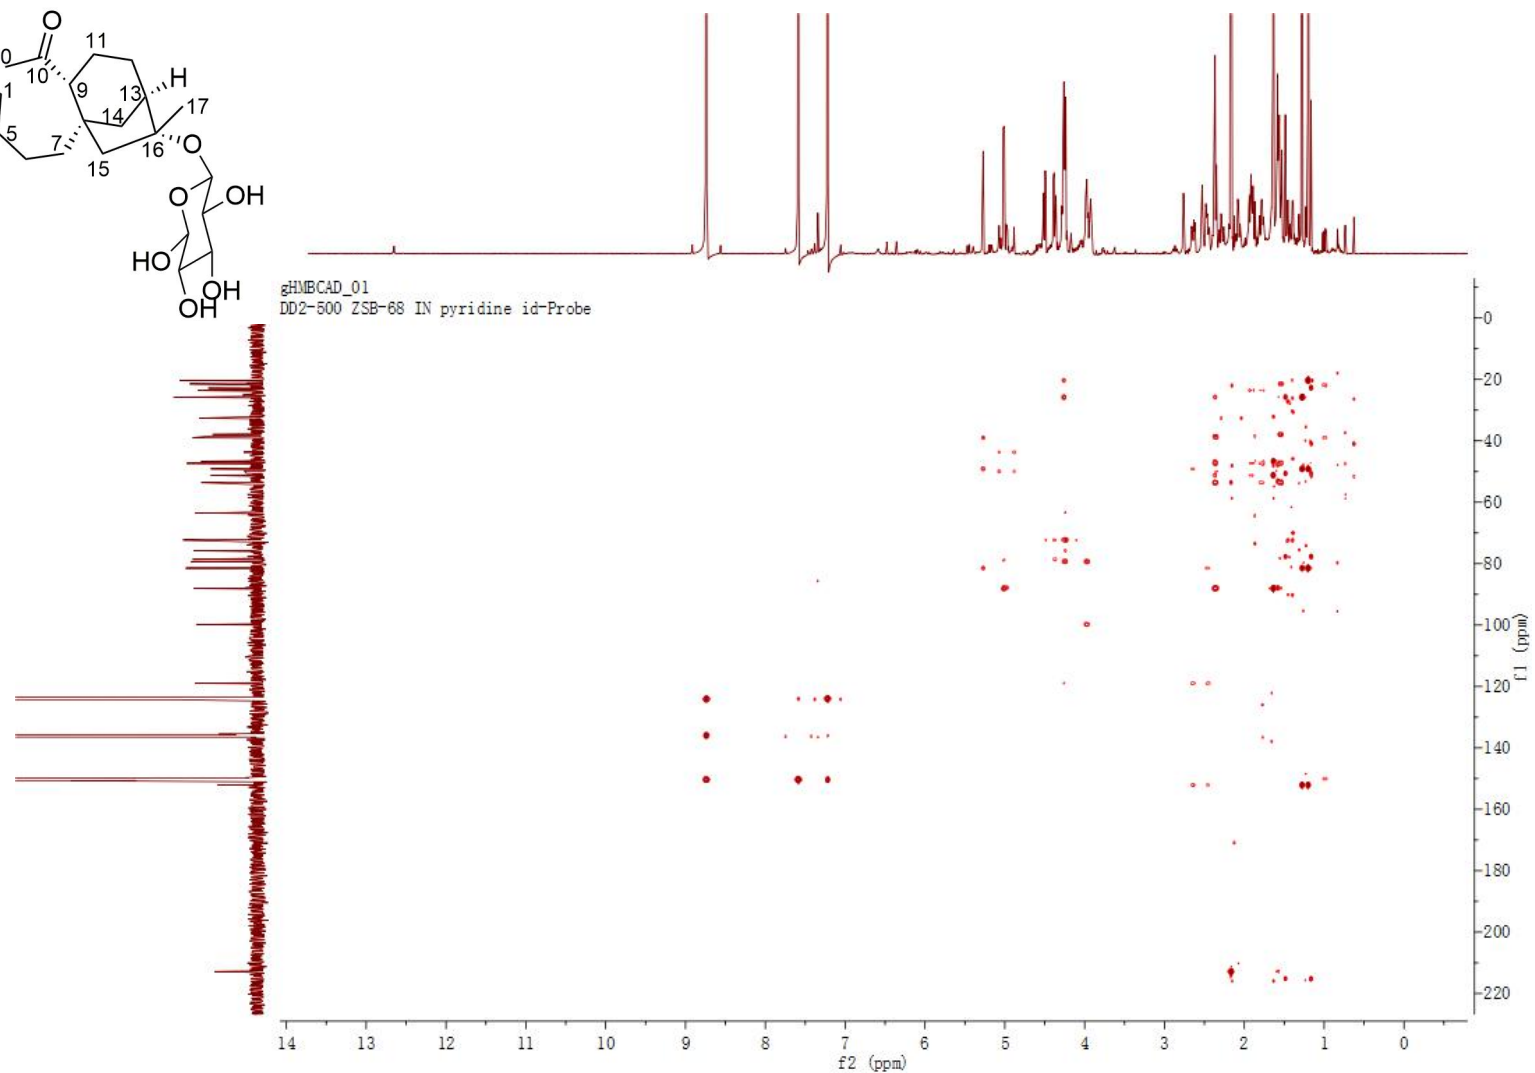

The HMBC spectrum of **1** in C<sub>5</sub>D<sub>5</sub>N (<sup>1</sup>H: 500 MHz, <sup>13</sup>C: 125 MHz)

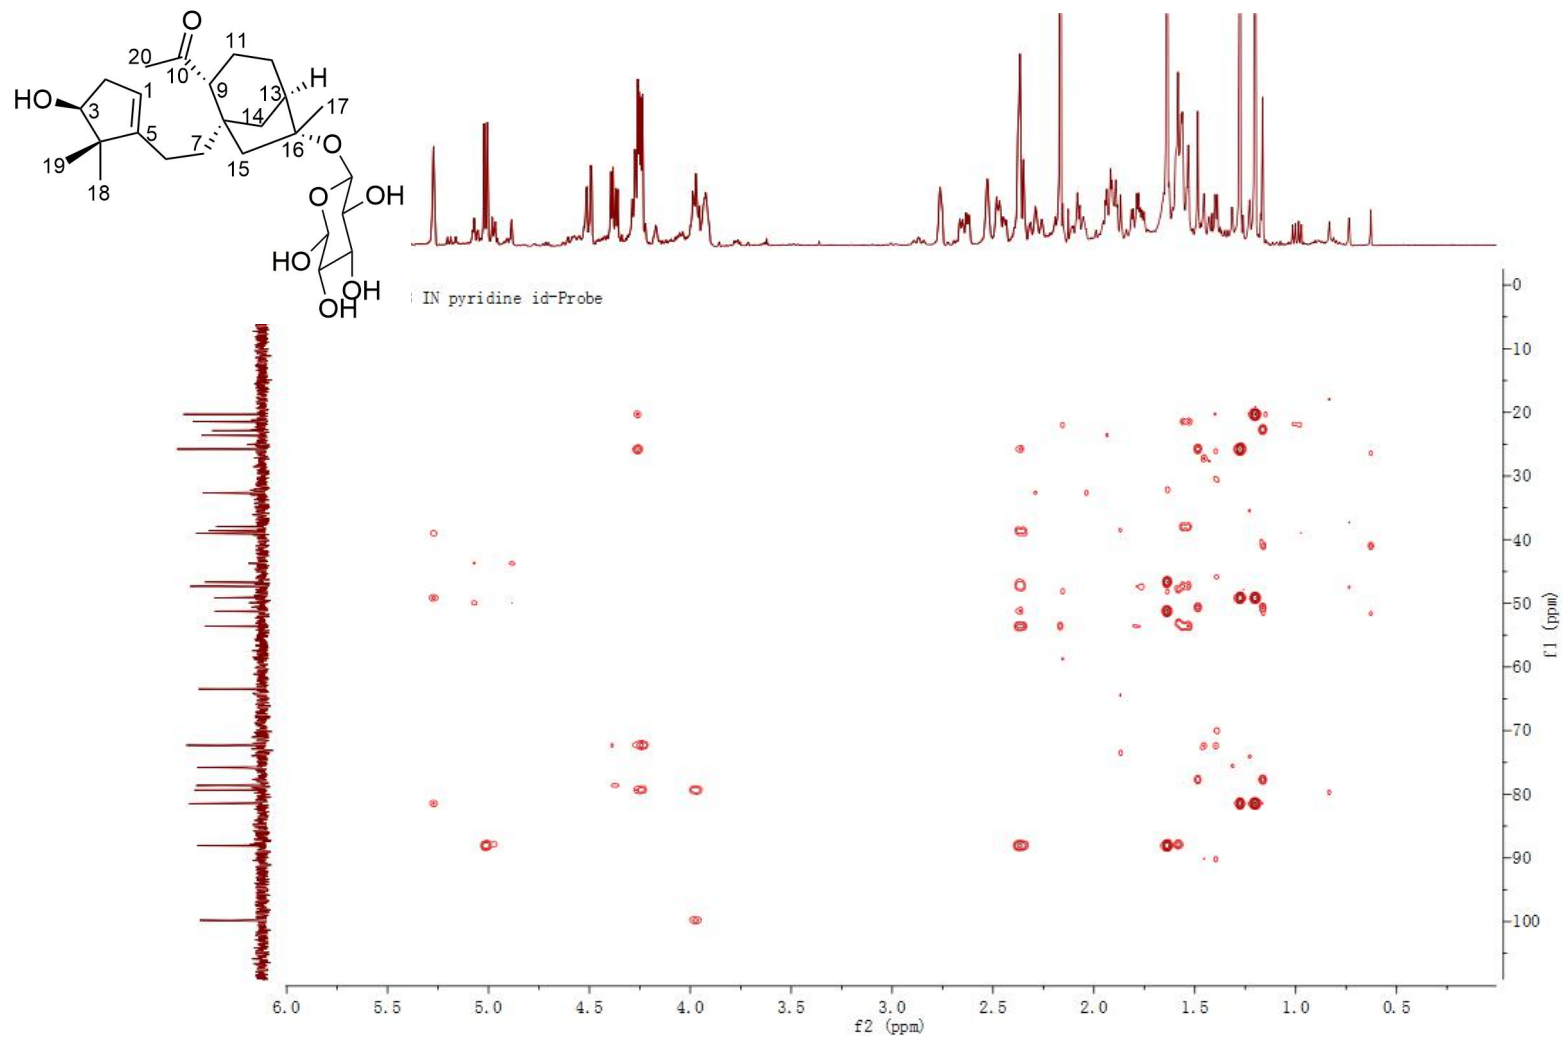

The HMBC spectrum (amplified) of **1** in  $\text{C}_5\text{D}_5\text{N}$  ( $^1\text{H}$ : 500 MHz,  $^{13}\text{C}$ : 125 MHz)

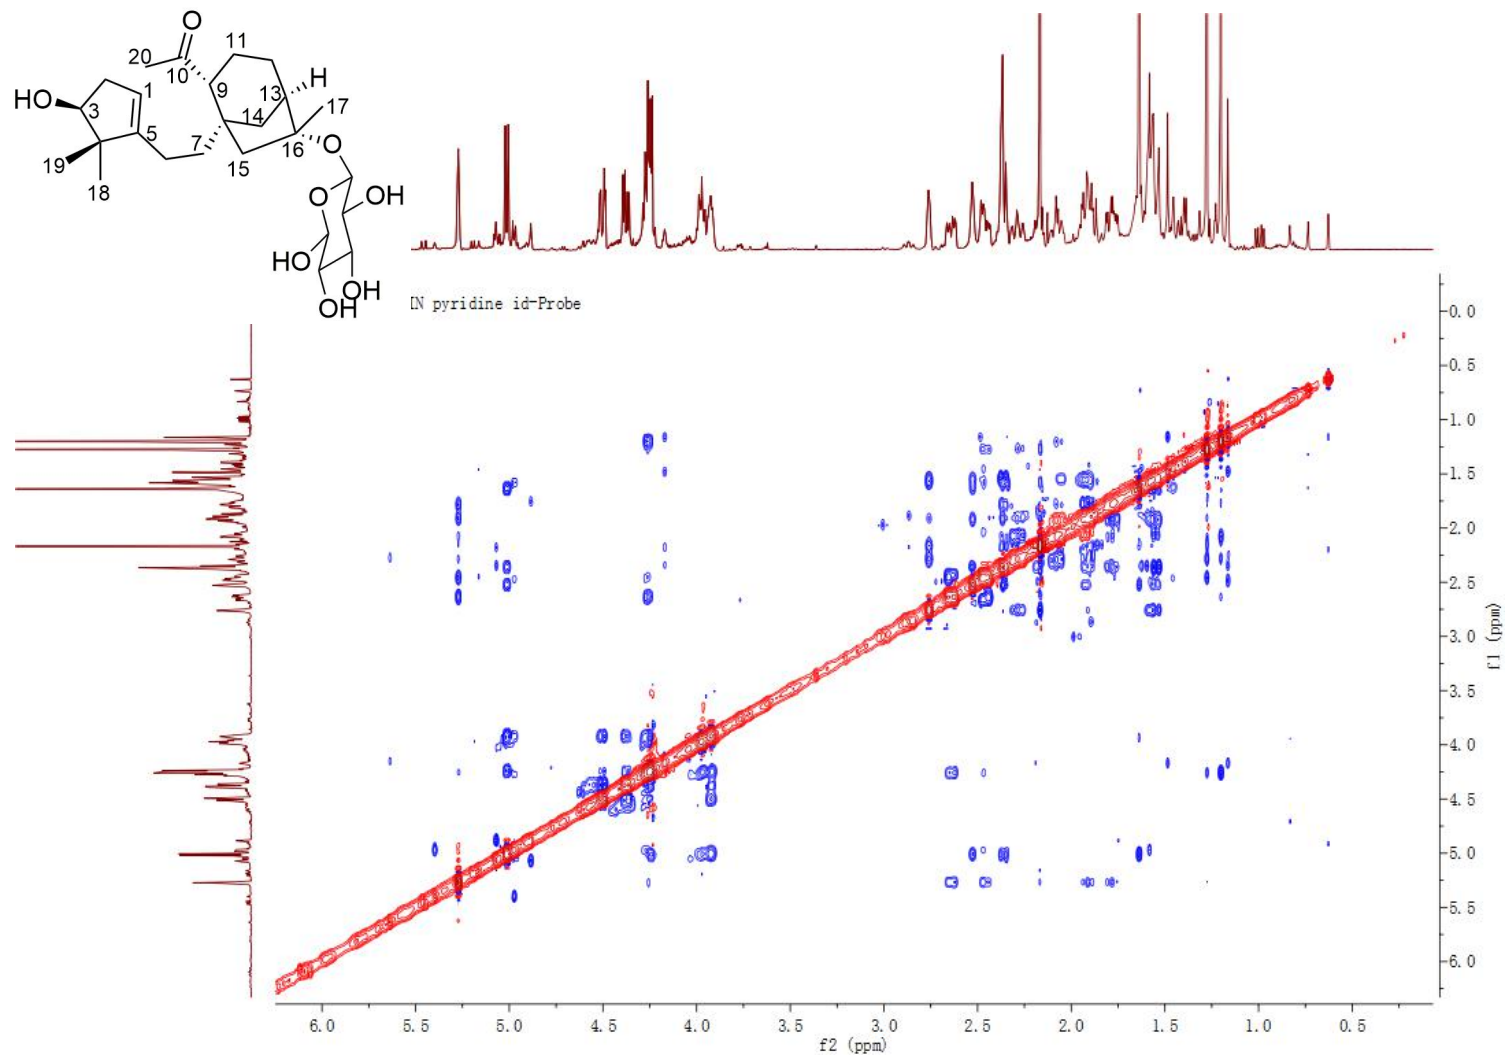



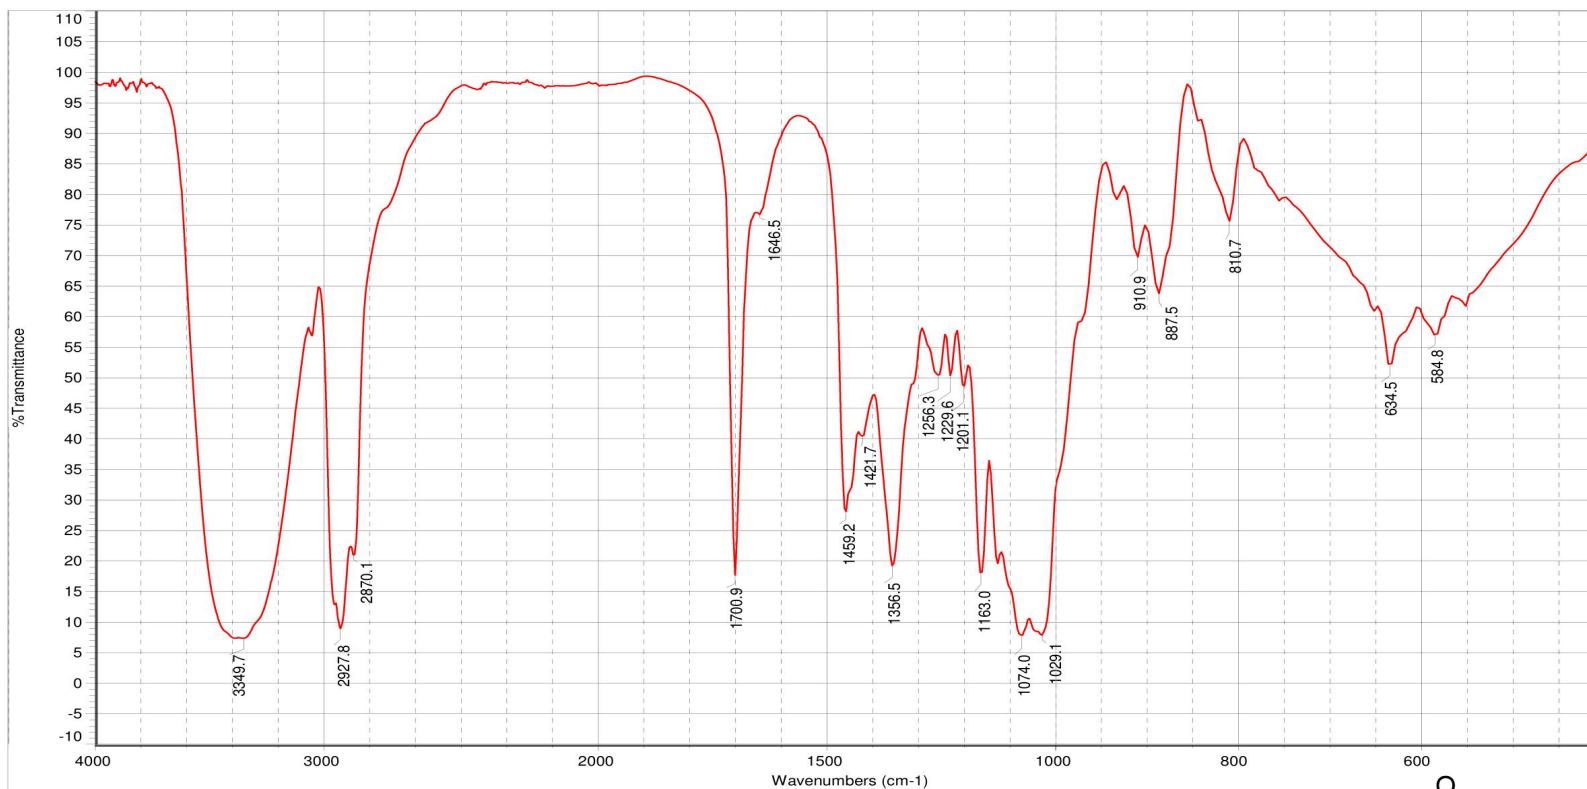

日期: 星期四 11月 03 13:27:44 2016 (GMT+08:00) Sample Name : ZSB - 55

( 显微镜透射法 FT- IR Microscope Tra

扫描次数: 100

傅里叶变换红外显微镜(FT-IR Microscope): Centaurus

分辨率: 8.000

美国热电公司(Thermo)傅里叶变换红外光谱仪:Nicolet 5700

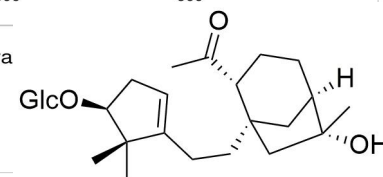

The IR spectrum of 2

MS Formula Results: + Scan (6.470 min) Sub (2015101203.d)

| m/z      | Ion                 | Formula                                          | Abundance |
|----------|---------------------|--------------------------------------------------|-----------|
| 505.2781 | (M+Na) <sup>+</sup> | C <sub>26</sub> H <sub>42</sub> NaO <sub>8</sub> | 593222.4  |

  

| Best                                | Formula (M)                                                   | Ion Formula                                                     | Score | Cross Sco | Mass     | Calc Mass | Calc m/z | Diff (ppm) | Abs Diff (ppm) | Mass Match | Abund Match | Spacing Match | DBE |
|-------------------------------------|---------------------------------------------------------------|-----------------------------------------------------------------|-------|-----------|----------|-----------|----------|------------|----------------|------------|-------------|---------------|-----|
| <input checked="" type="checkbox"/> | C <sub>26</sub> H <sub>42</sub> O <sub>8</sub>                | C <sub>26</sub> H <sub>42</sub> NaO <sub>8</sub>                | 99.91 |           | 482.2888 | 482.288   | 505.2772 | -1.77      | 1.77           | 99.9       | 99.89       | 99.94         | 6   |
| <input type="checkbox"/>            | C <sub>27</sub> H <sub>38</sub> N <sub>4</sub> O <sub>4</sub> | C <sub>27</sub> H <sub>38</sub> N <sub>4</sub> NaO <sub>4</sub> | 99.85 |           | 482.2888 | 482.2893  | 505.2785 | 0.99       | 0.99           | 99.97      | 99.53       | 99.98         | 11  |

page 1

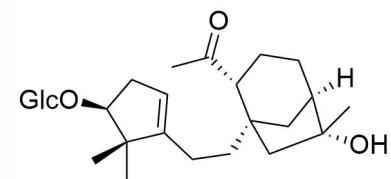

The HRESIMS spectrum of **2**

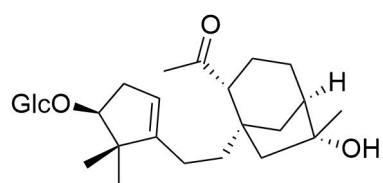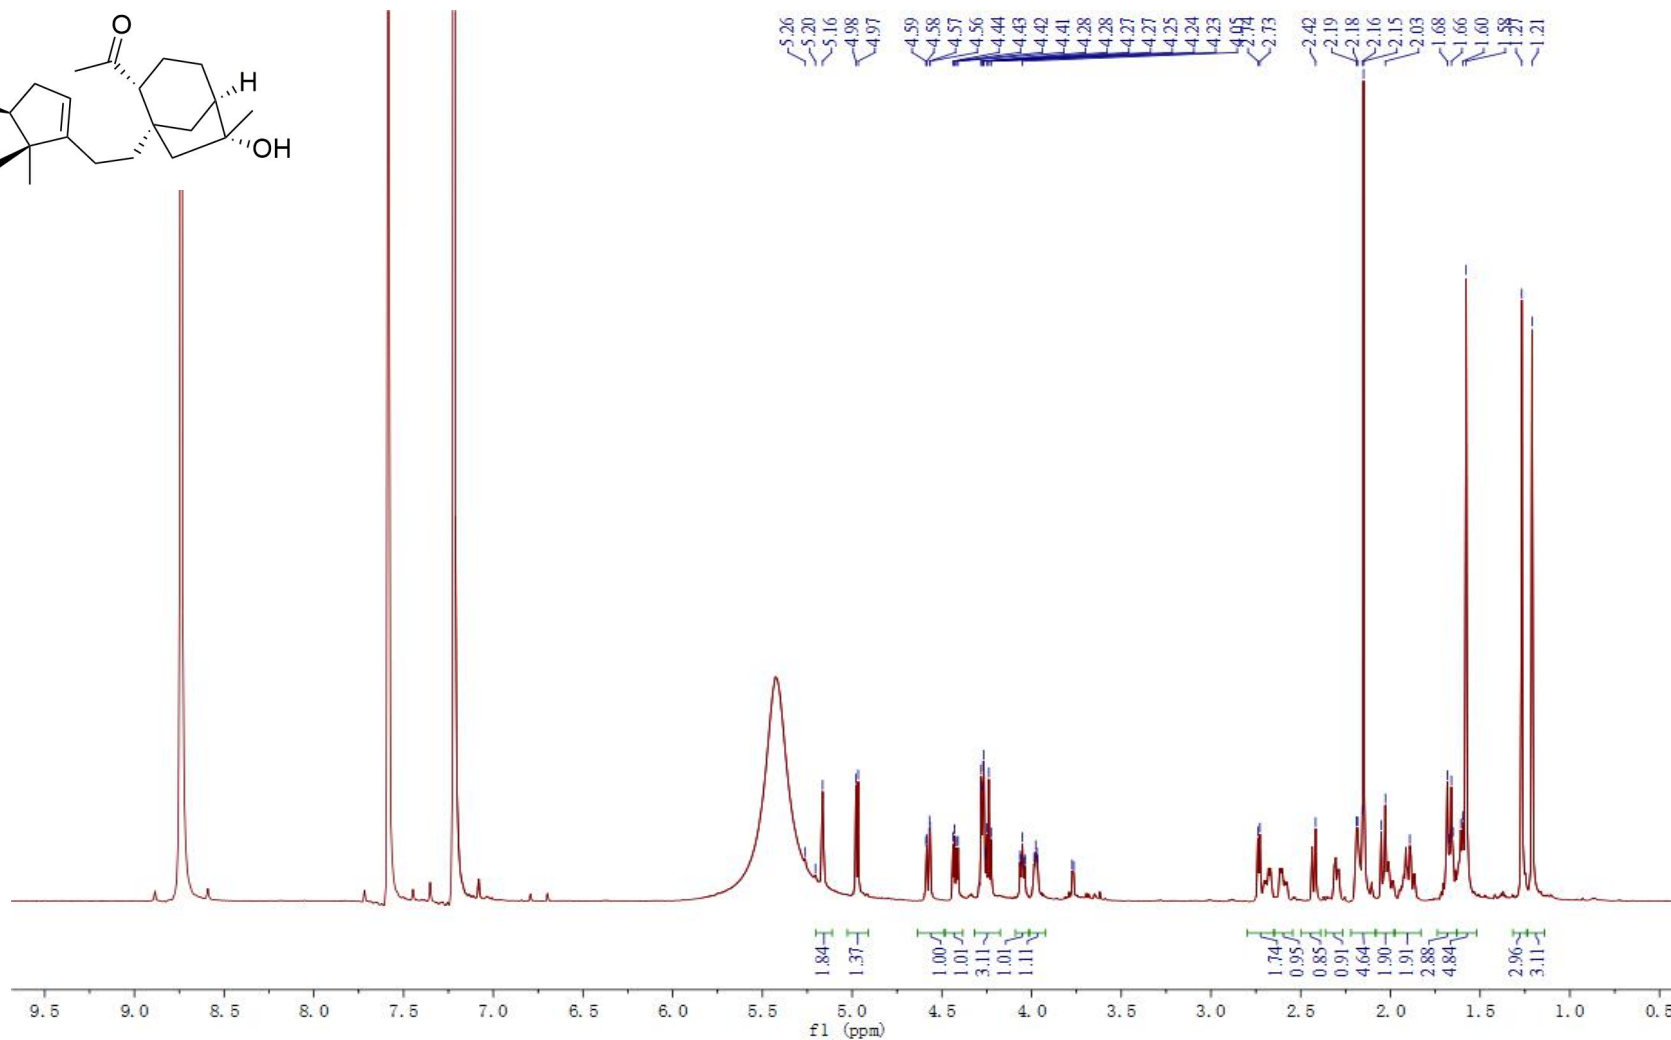

The <sup>1</sup>H NMR spectrum of **2** in C<sub>5</sub>D<sub>5</sub>N (600 MHz)

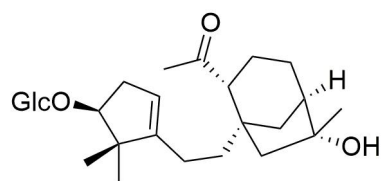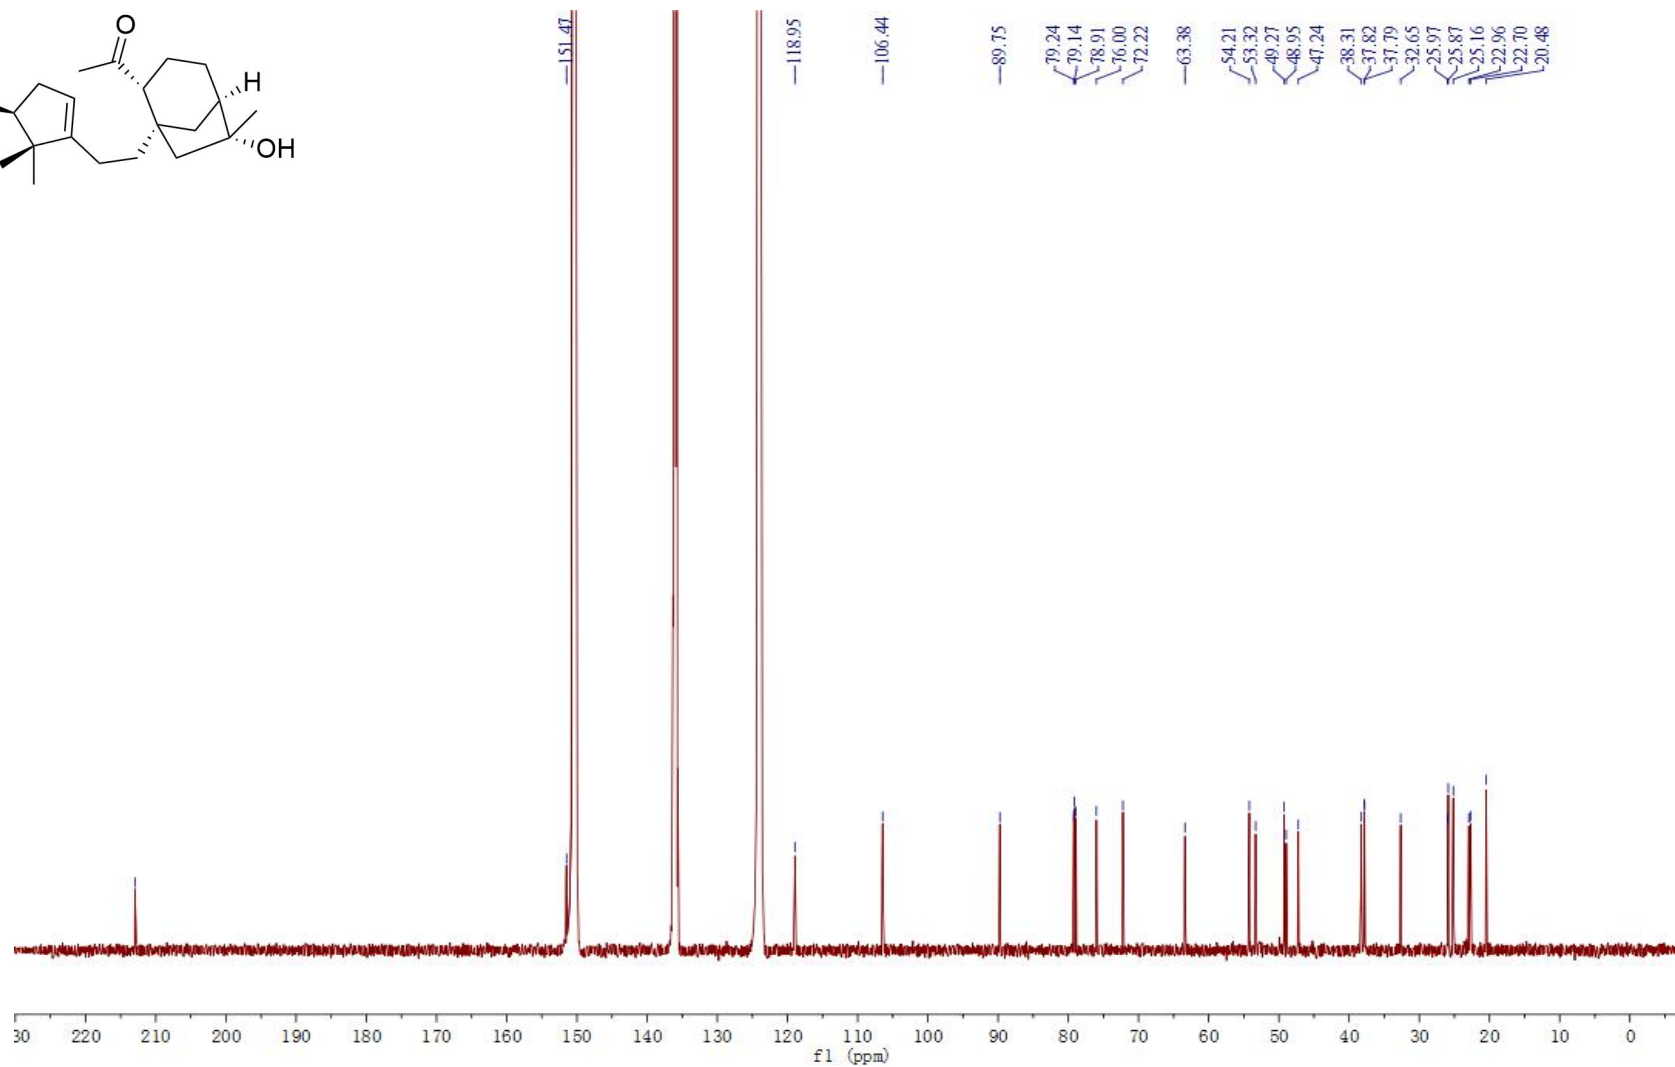

The  $^{13}\text{C}$  NMR spectrum of **2** in  $\text{C}_5\text{D}_5\text{N}$  (150 MHz)

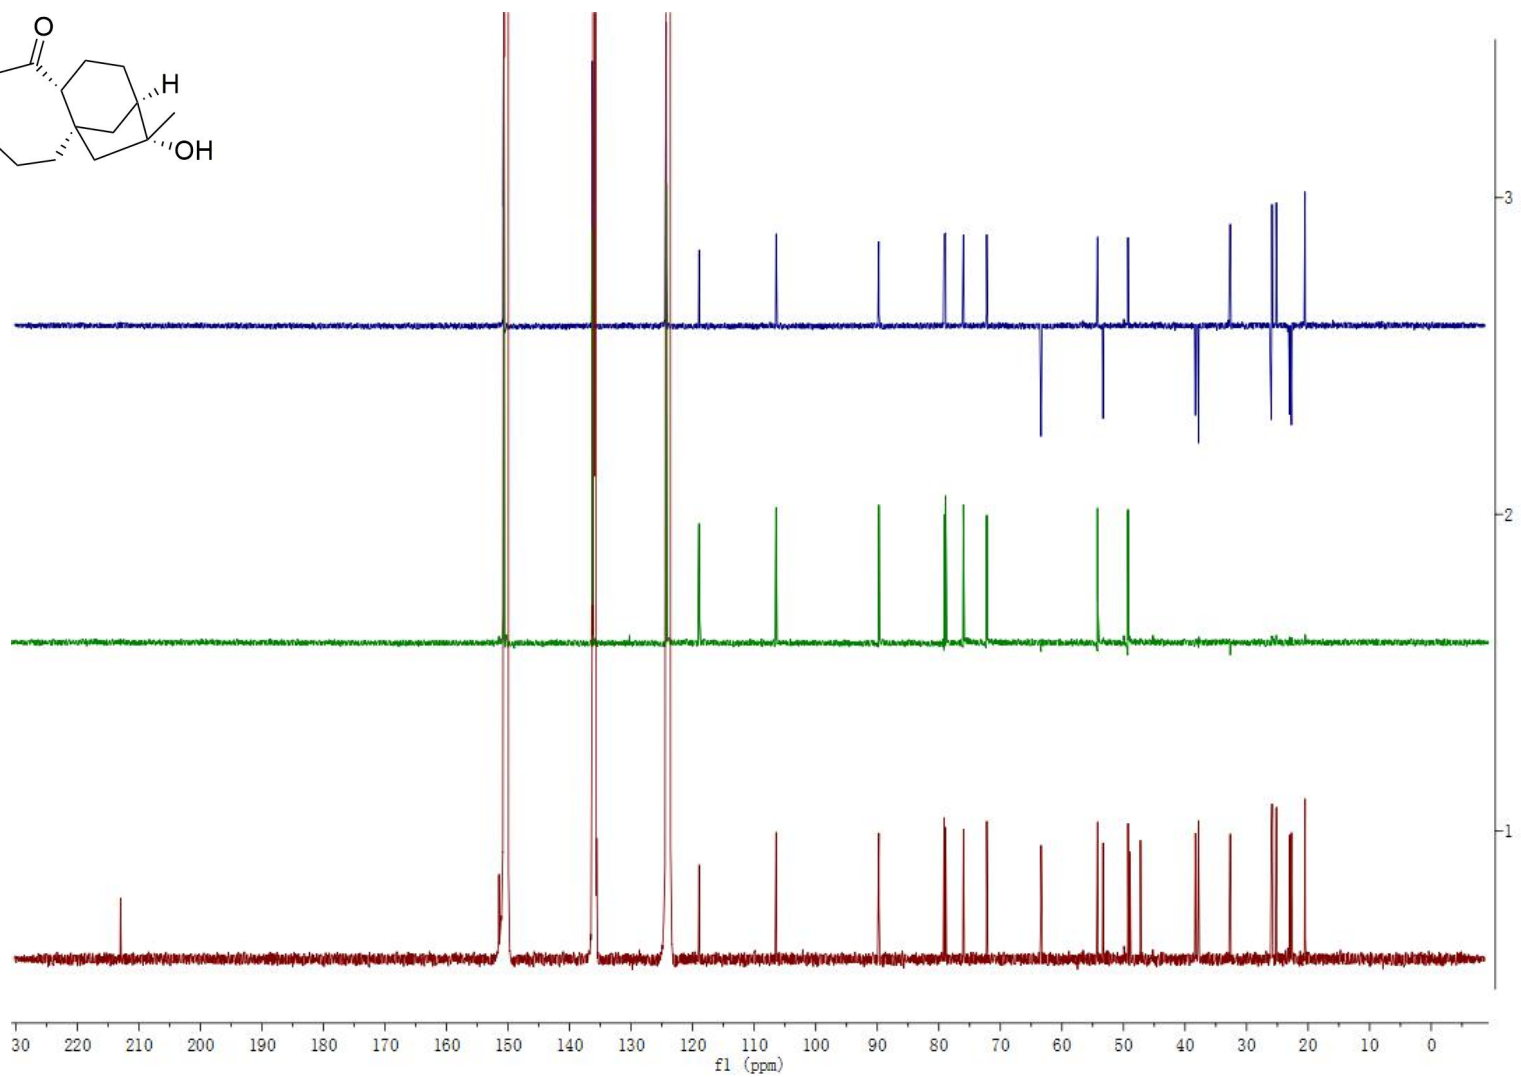

The DEPT spectrum of **2** in  $C_5D_5N$  (150 MHz)

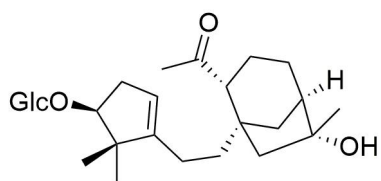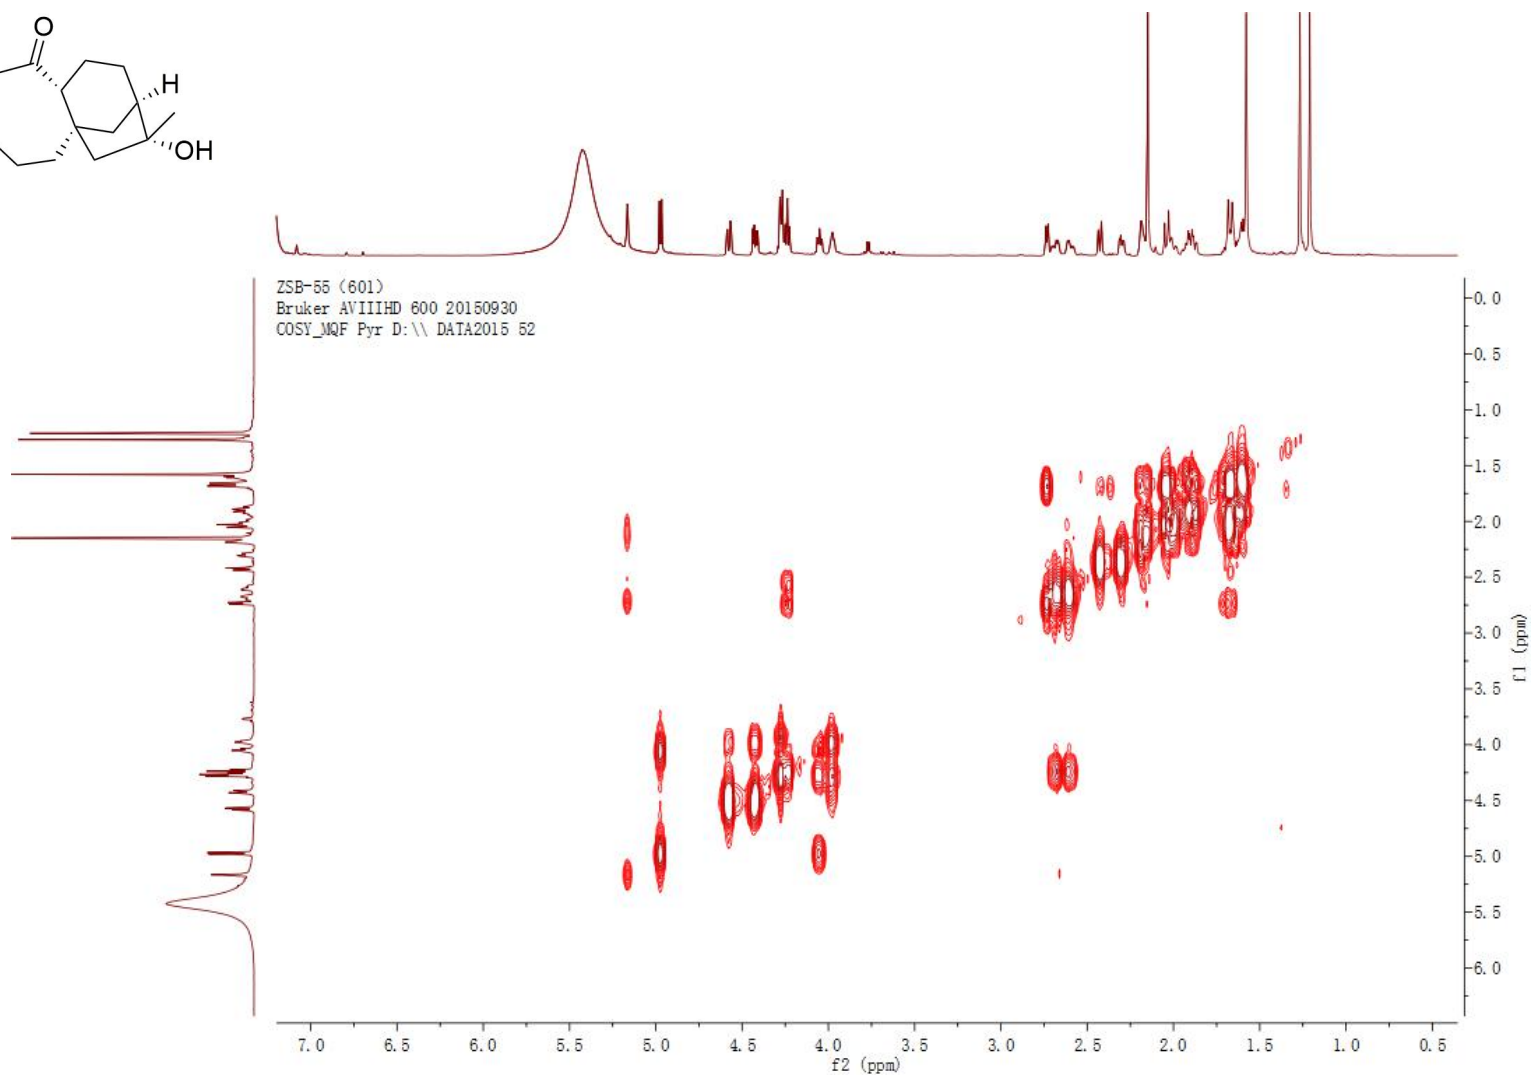

The COSY spectrum of **2** in  $C_5D_5N$  (600 MHz)

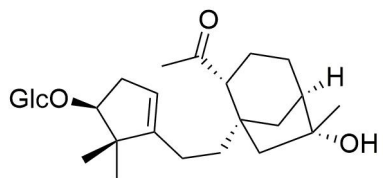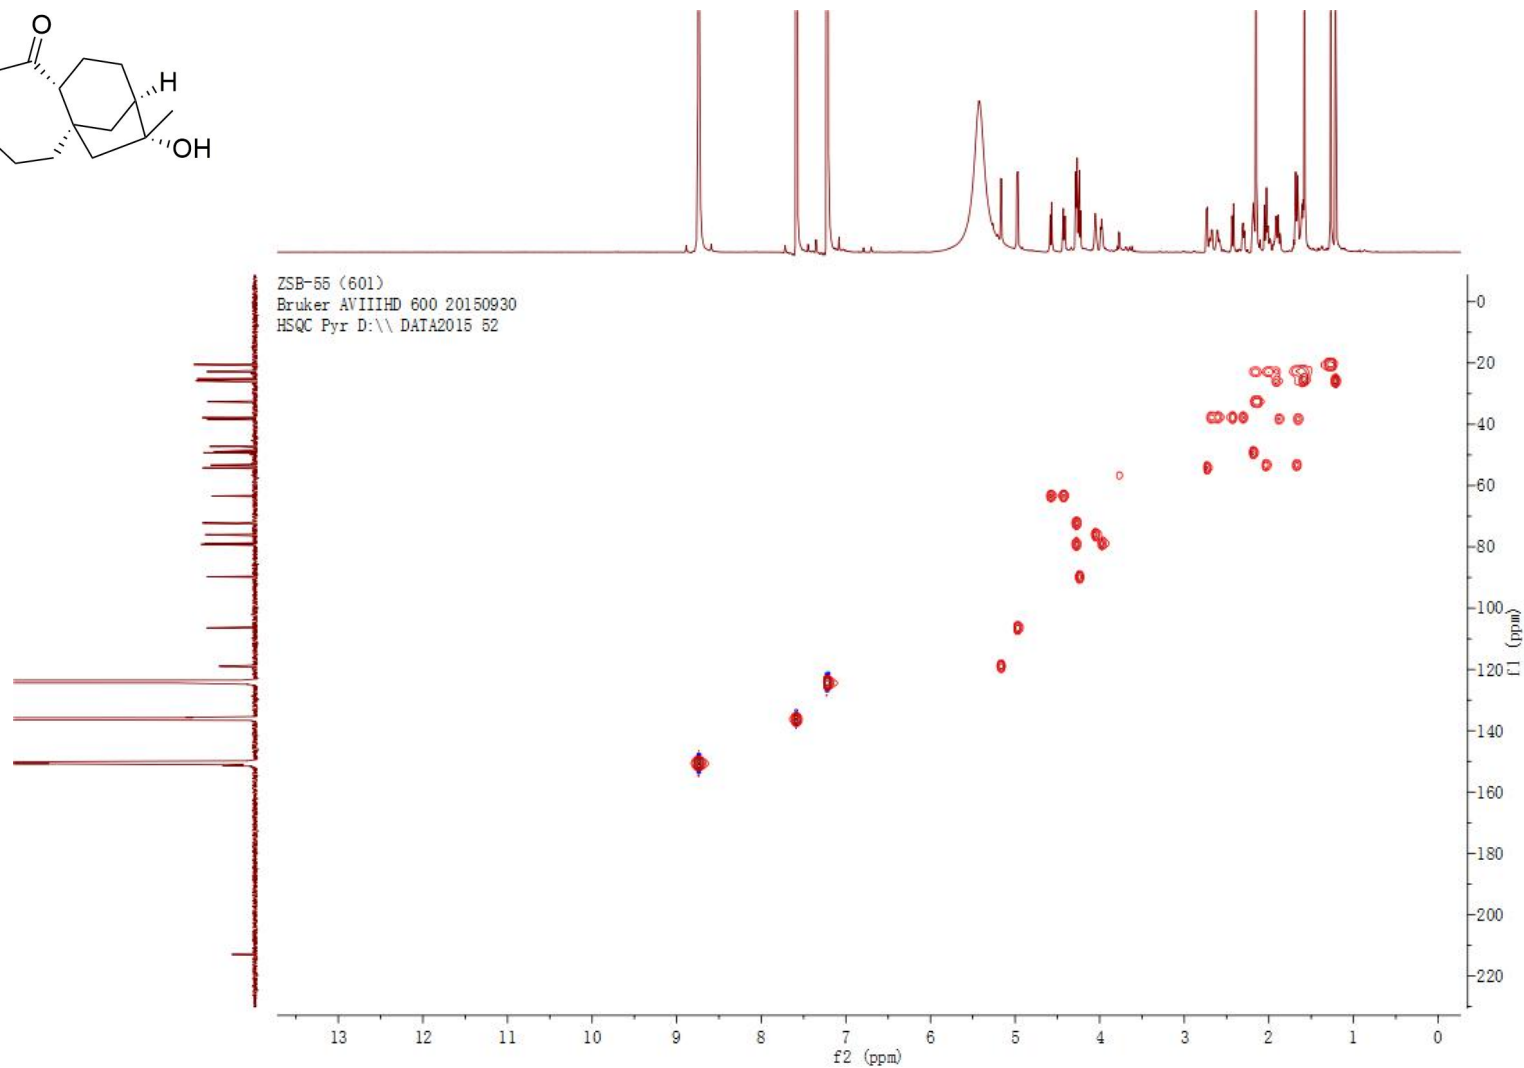

The HSQC of **2** in  $C_5D_5N$  ( $^1H$ : 600 MHz,  $^{13}C$ : 150 MHz)

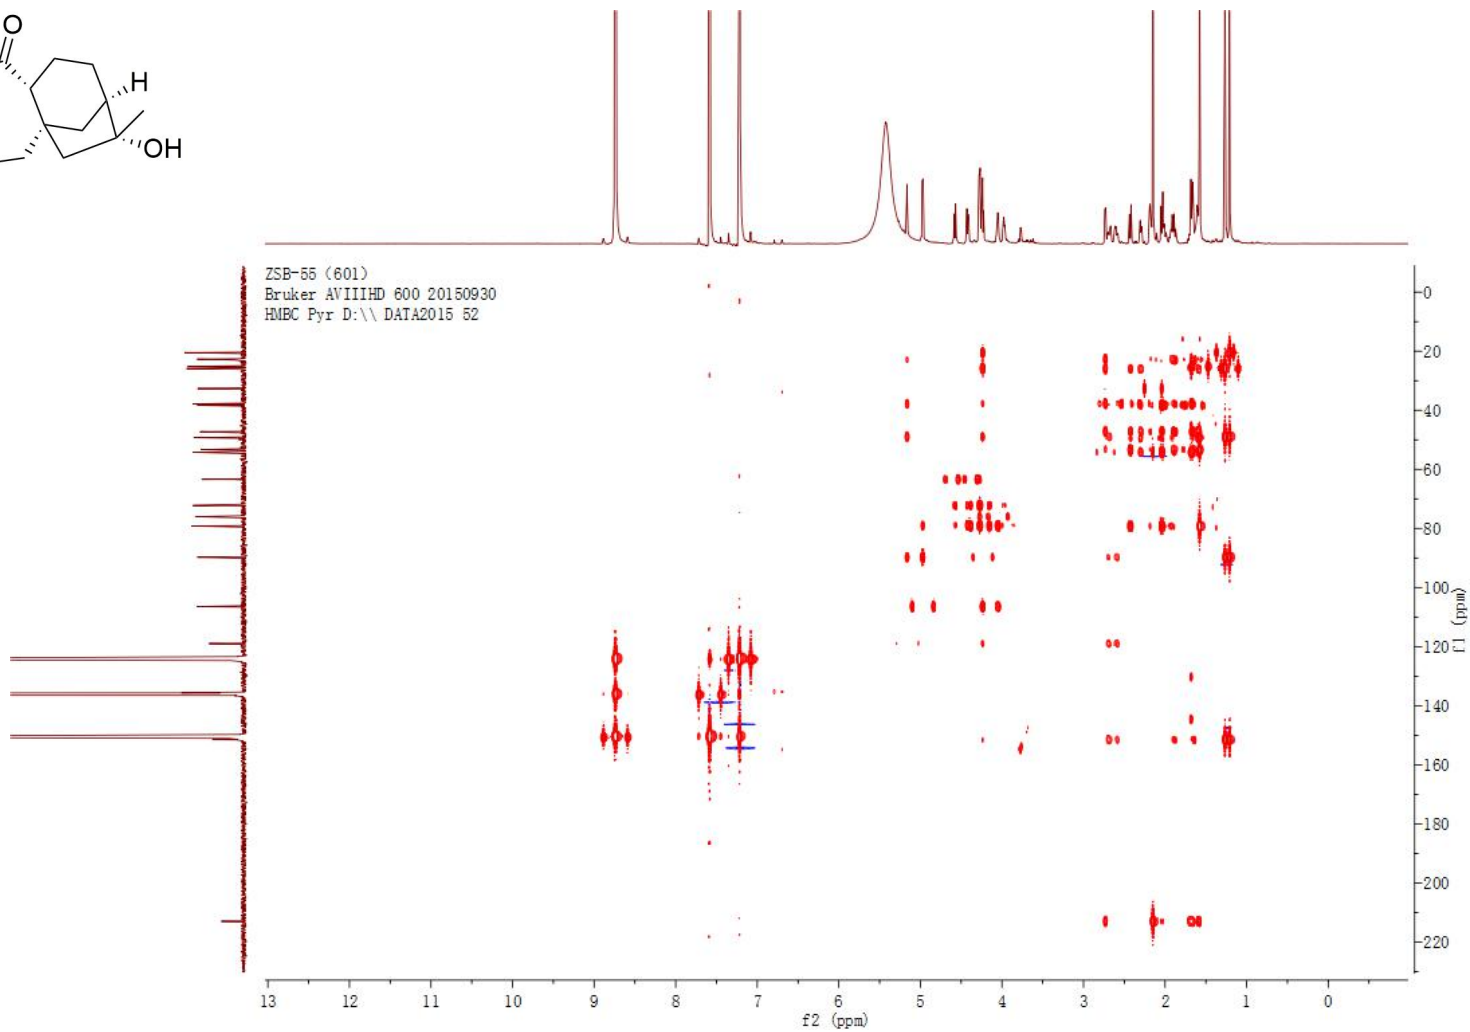

The HMBC spectrum of **2** in  $C_5D_5N$  ( $^1H$ : 600 MHz,  $^{13}C$ : 150 MHz)



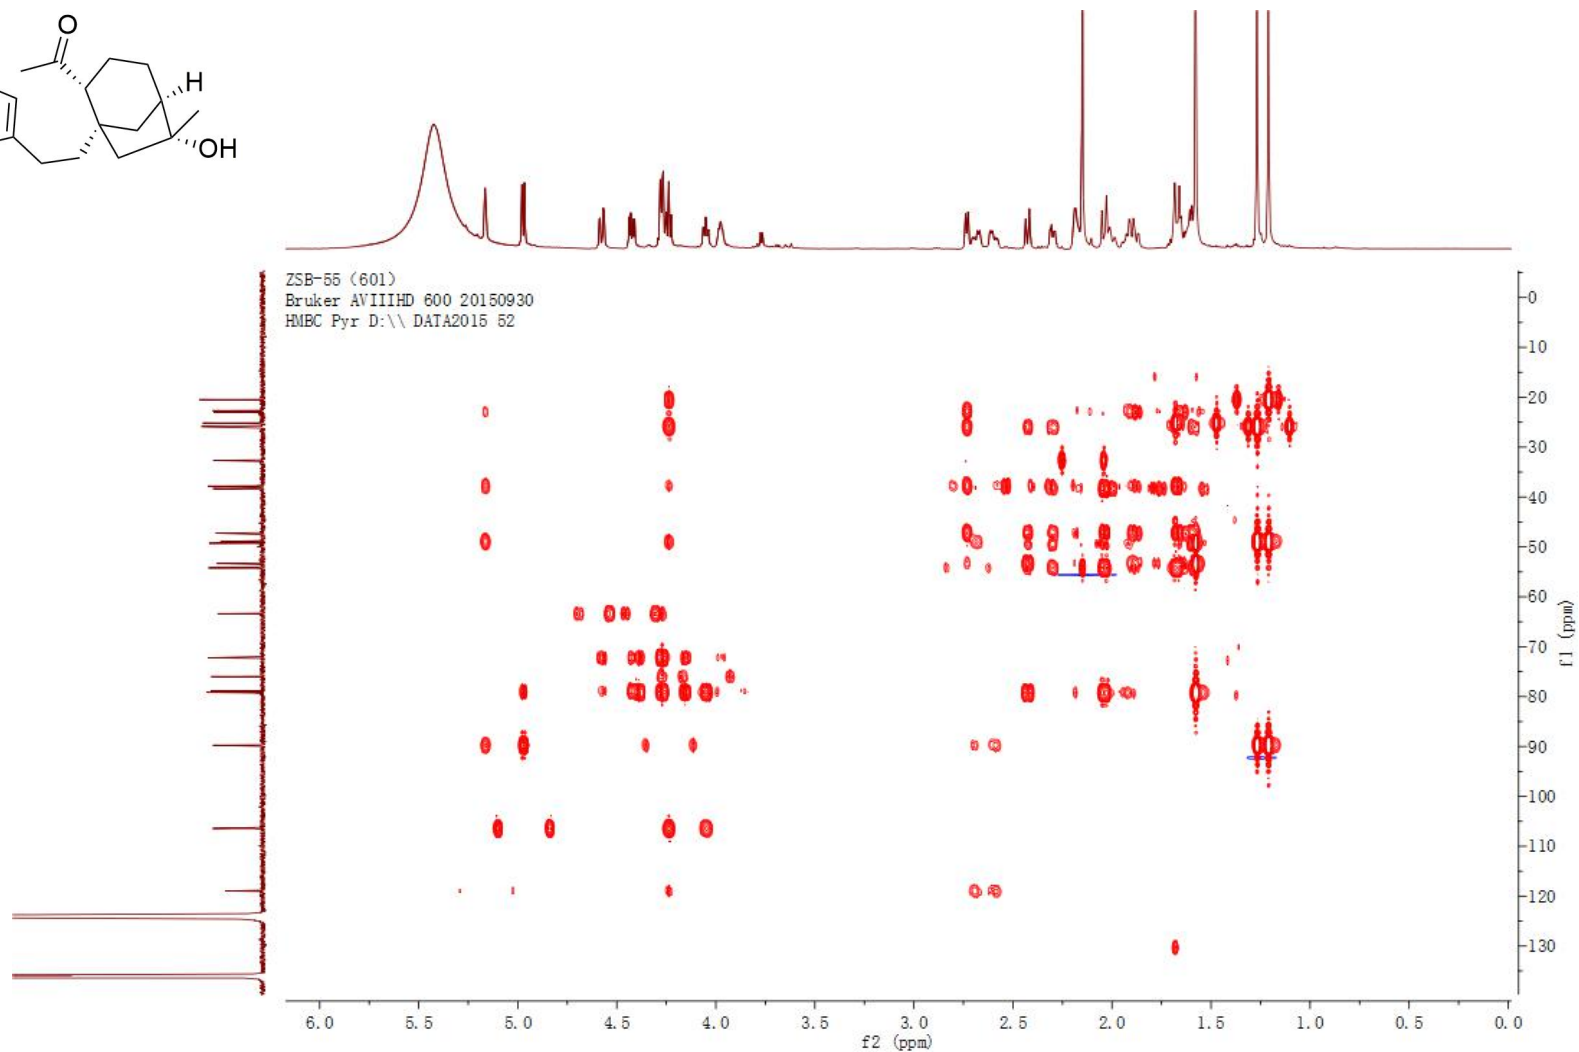

The HMBC spectrum (amplified) of **2** in  $C_5D_5N$  ( $^1H$ : 600 MHz,  $^{13}C$ : 150 MHz)

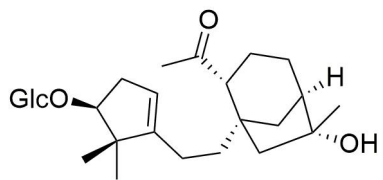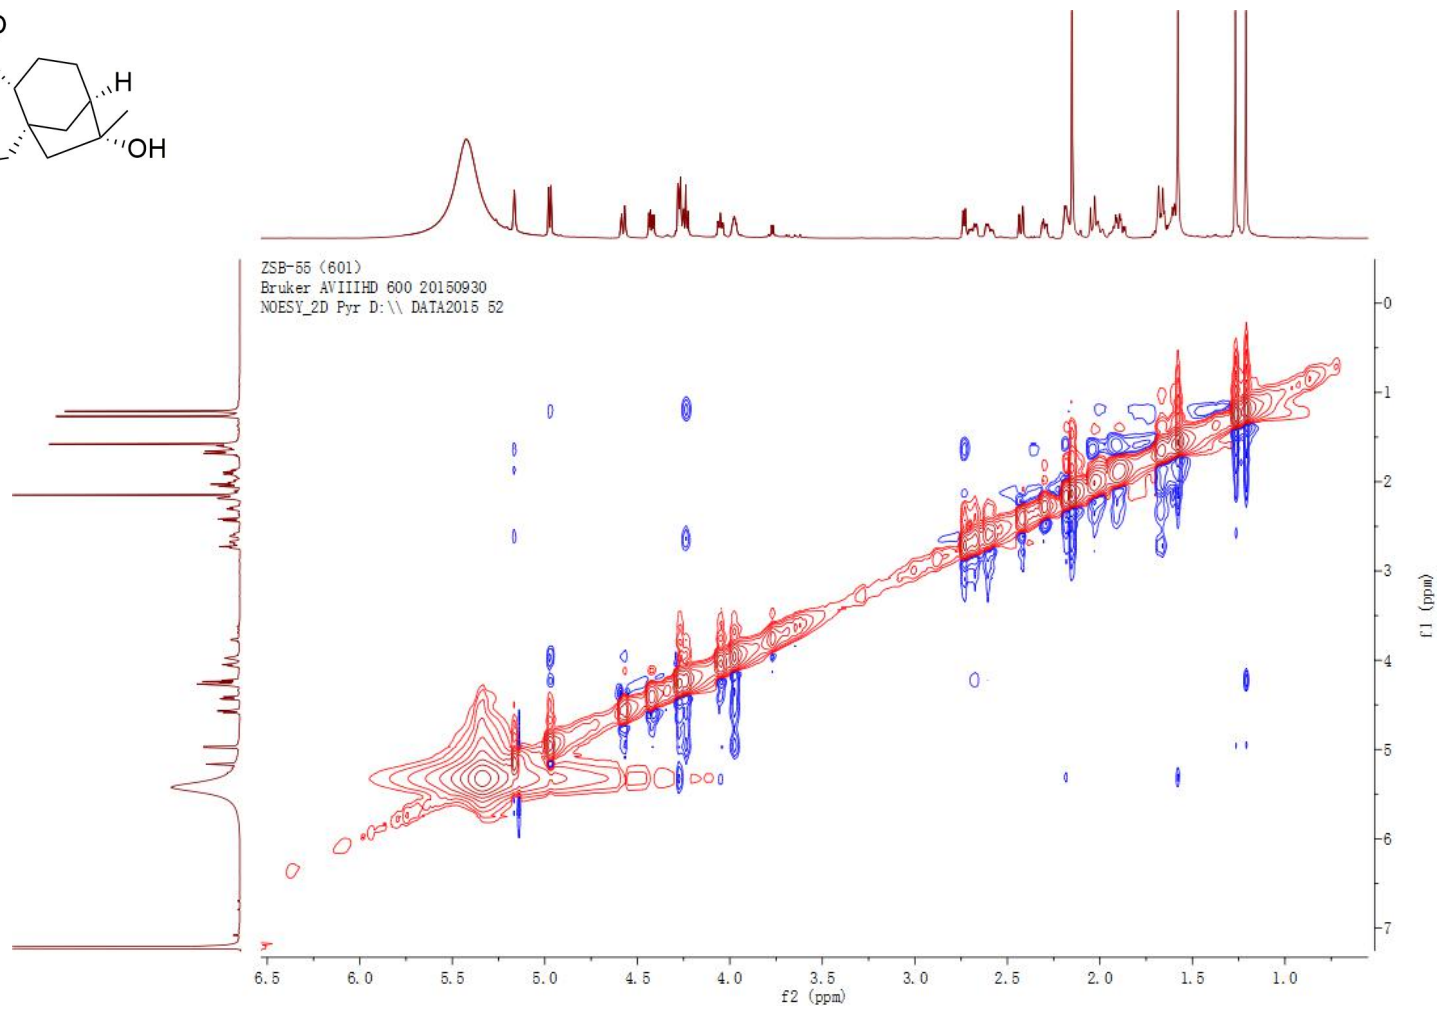

The NOESY spectrum of **2** in  $C_5D_5N$  (600 MHz)

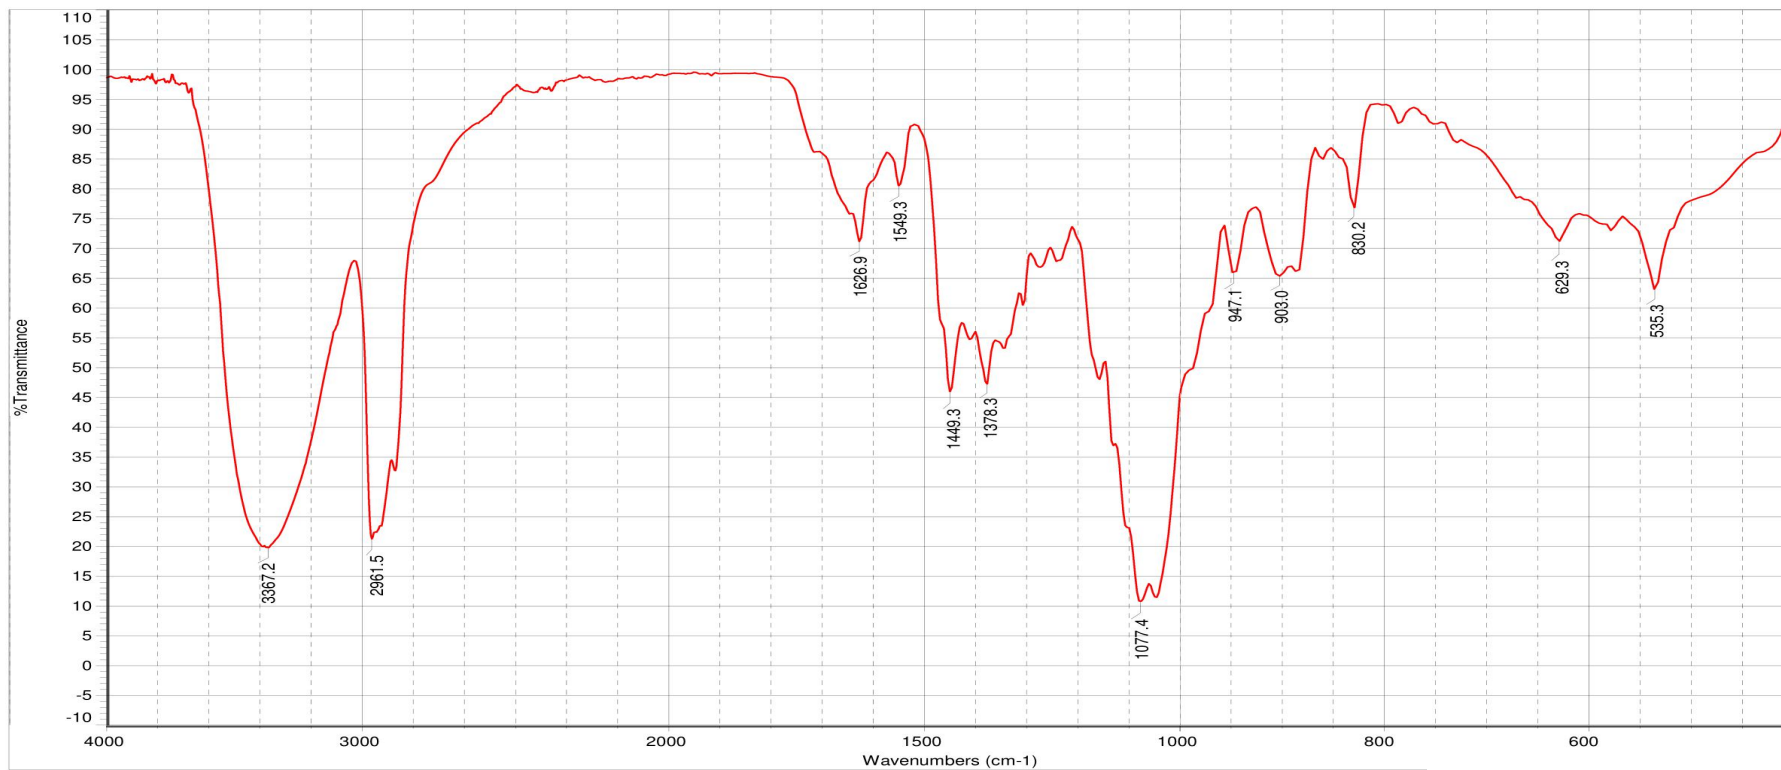

日期: 星期四 11月 03 12:48:53 2016 (GMT+08:00) Sample Name : ZSB - 186 (显微镜透射法 FT- IR Microscope Trans)  
 扫描次数: 100 傅里叶变换红外显微镜 (FT-IR Microscope): Centaurus  
 分辨率: 8.000 美国热电公司 (Thermo) 傅里叶变换红外光谱仪: Nicolet 5700

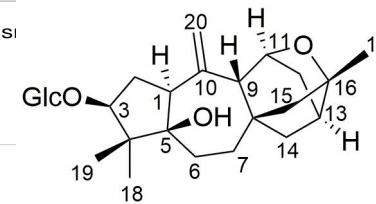

The IR spectrum of **3**

MS Formula Results: + Scan (7.152 min) Sub (2016061502.d)

| m/z      | Ion                 | Formula                                          | Abundance |
|----------|---------------------|--------------------------------------------------|-----------|
| 503.2623 | (M+Na) <sup>+</sup> | C <sub>26</sub> H <sub>40</sub> NaO <sub>8</sub> | 938446.8  |

  

| Best                                | Formula (M)                                                   | Ion Formula                                                     | Score | Cross Sco | Mass     | Calc Mass | Calc m/z | Diff (ppm) | Abs Diff (ppm) | Mass Match | Abund Match | Spacing Match | DBE |
|-------------------------------------|---------------------------------------------------------------|-----------------------------------------------------------------|-------|-----------|----------|-----------|----------|------------|----------------|------------|-------------|---------------|-----|
| <input checked="" type="checkbox"/> | C <sub>26</sub> H <sub>40</sub> O <sub>8</sub>                | C <sub>26</sub> H <sub>40</sub> NaO <sub>8</sub>                | 99.56 |           | 480.2731 | 480.2723  | 503.2615 | -1.58      | 1.58           | 99.92      | 98.8        | 99.73         | 7   |
| <input type="checkbox"/>            | C <sub>23</sub> H <sub>44</sub> O <sub>8</sub> S              | C <sub>23</sub> H <sub>44</sub> NaO <sub>8</sub> S              | 98.99 |           | 480.2731 | 480.2757  | 503.2649 | 5.43       | 5.43           | 99.08      | 99.48       | 98.22         | 2   |
| <input type="checkbox"/>            | C <sub>27</sub> H <sub>44</sub> O <sub>3</sub> S <sub>2</sub> | C <sub>27</sub> H <sub>44</sub> NaO <sub>3</sub> S <sub>2</sub> | 98.42 |           | 480.2731 | 480.2732  | 503.2624 | 0.21       | 0.21           | 100        | 96.55       | 97.53         | 6   |

page 1

The HRESIMS spectrum of **3**

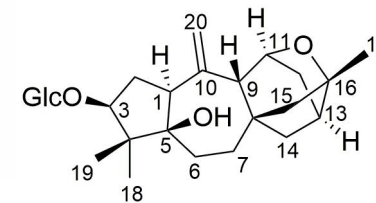

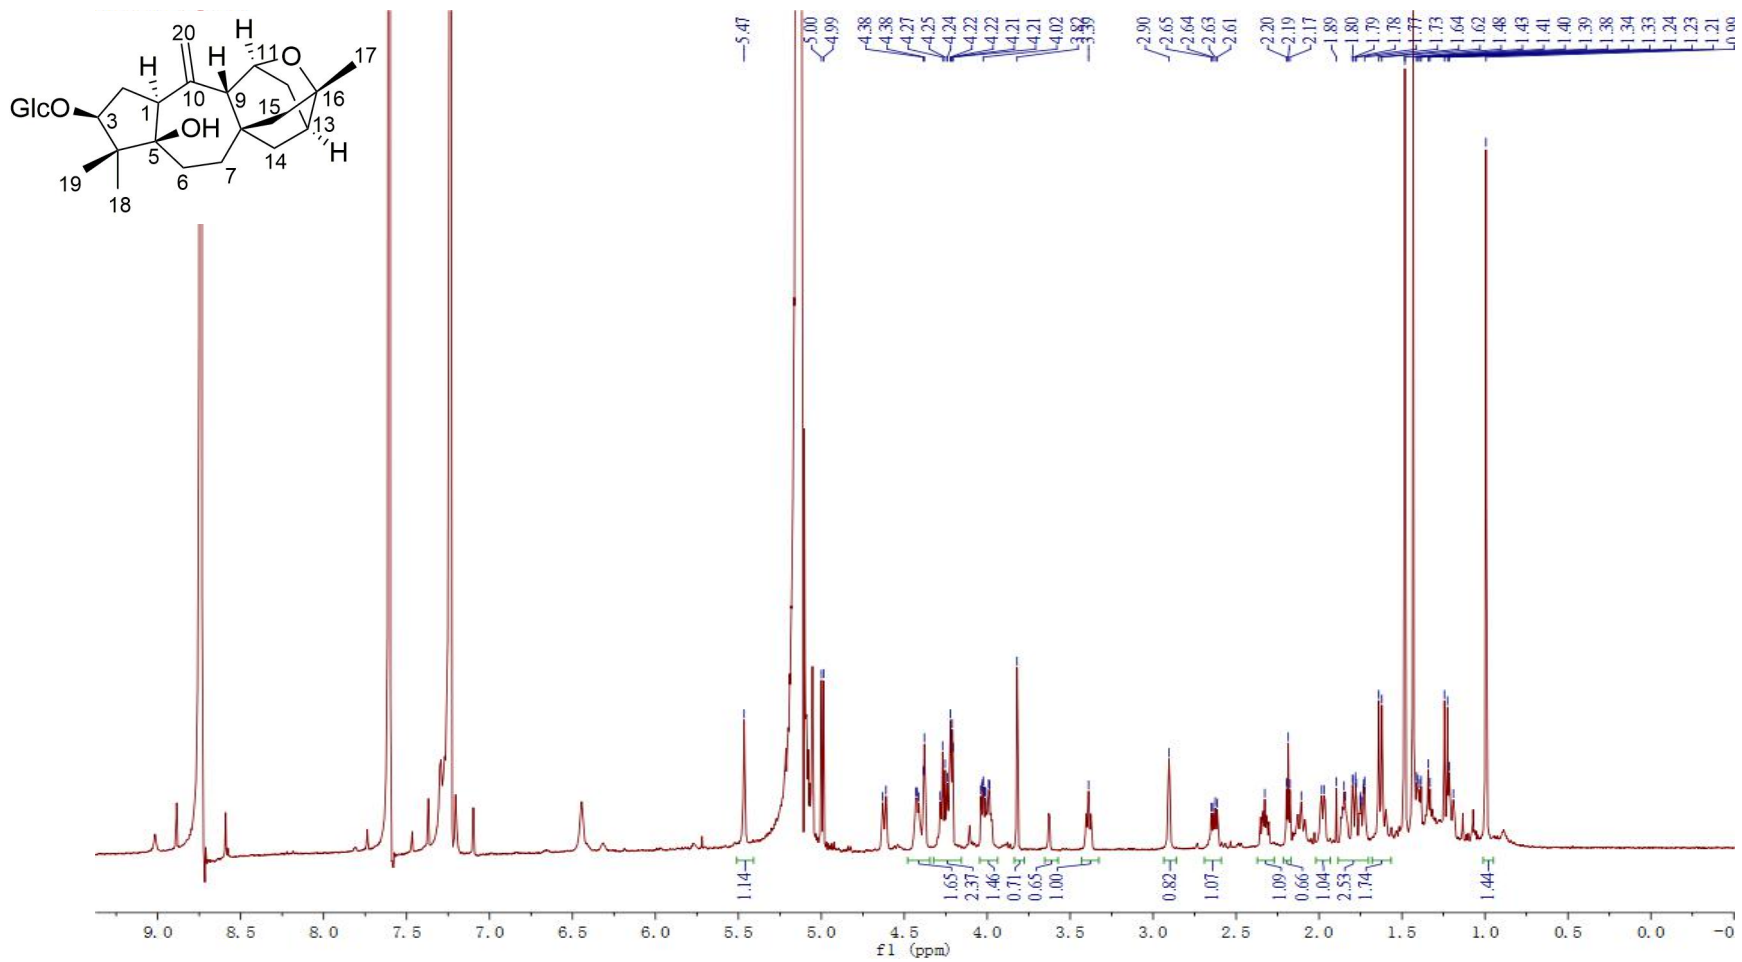

The <sup>1</sup>H NMR spectrum of **3** in C<sub>5</sub>D<sub>5</sub>N (600 MHz)

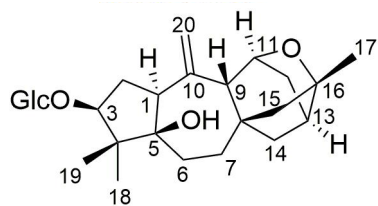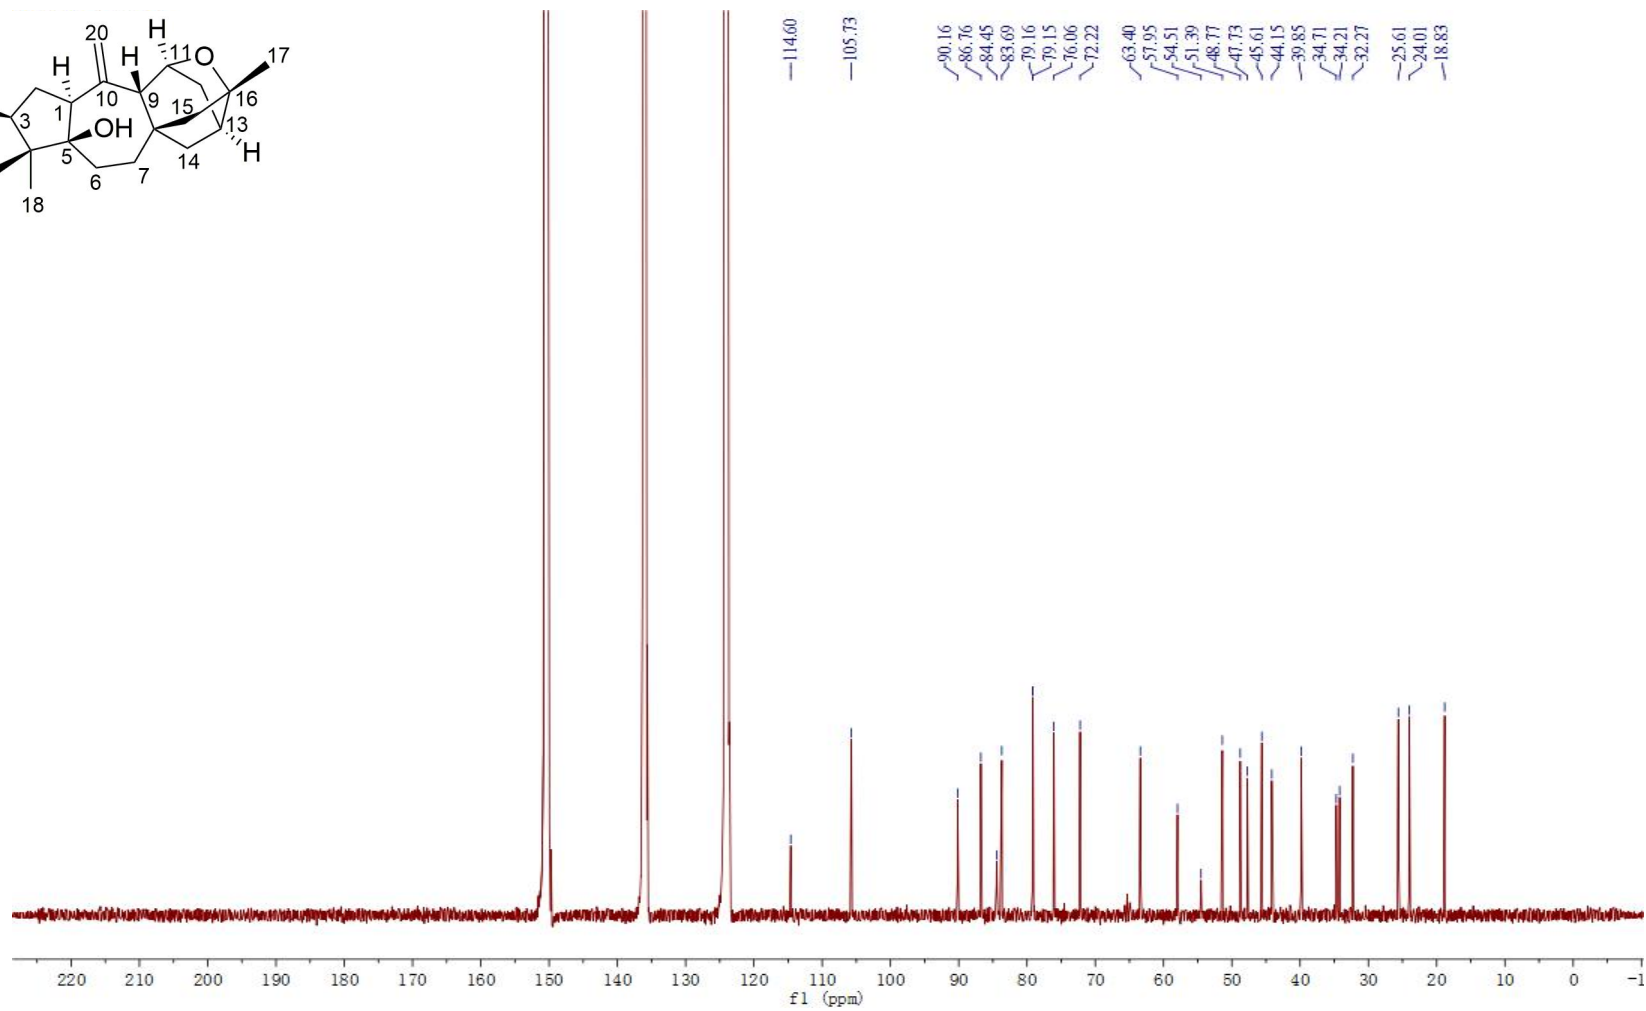

The  $^{13}\text{C}$  NMR spectrum of **3** in  $\text{C}_5\text{D}_5\text{N}$  (150 MHz)

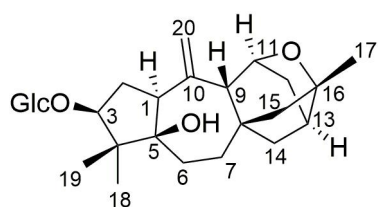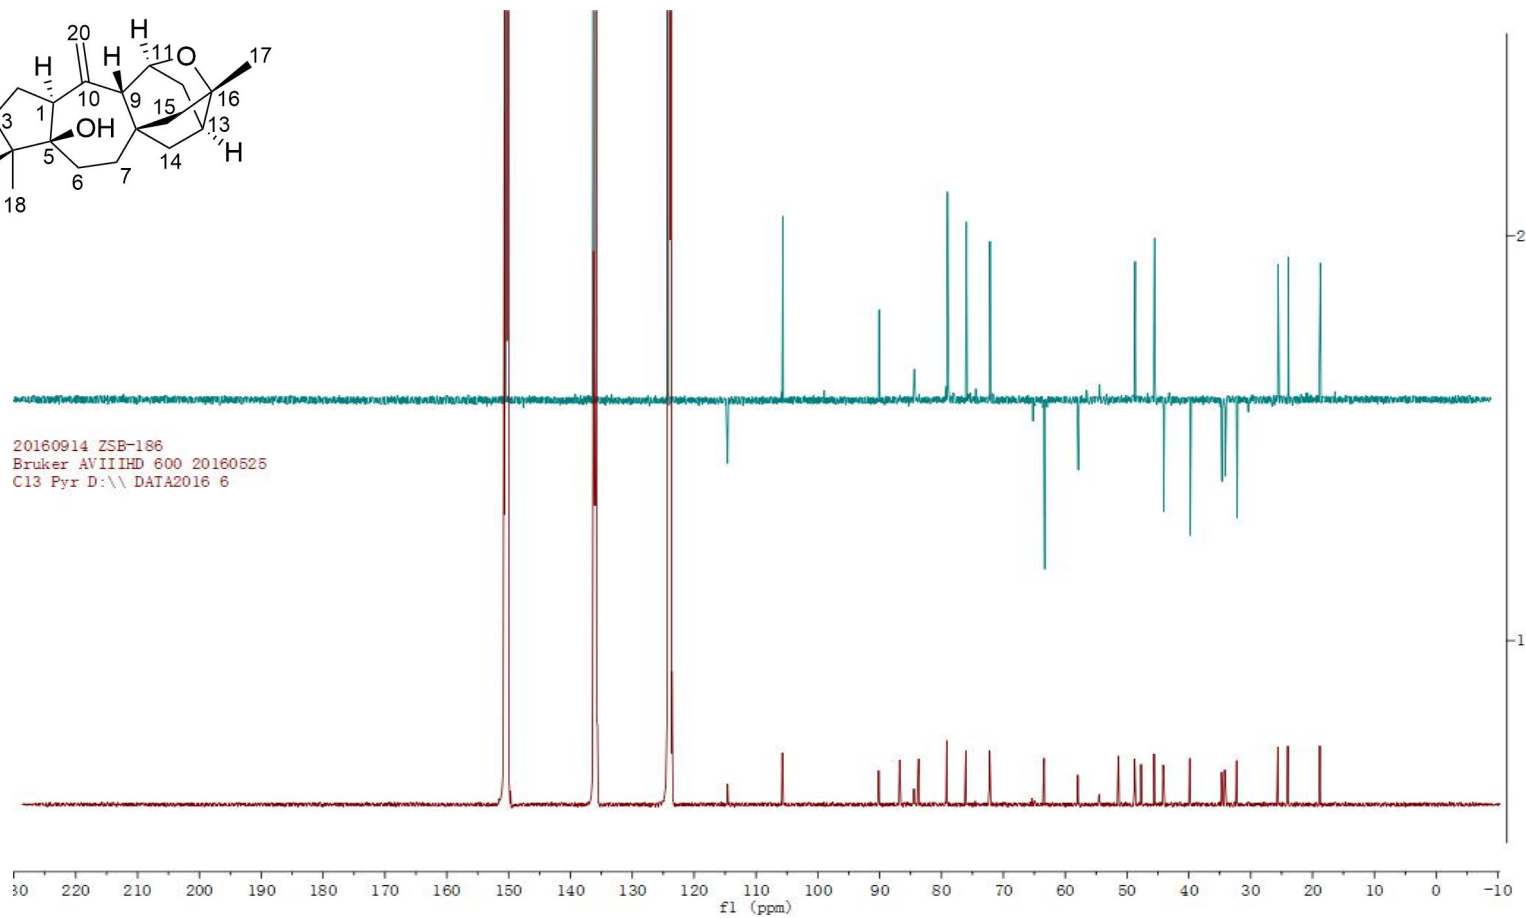

The DEPT (135°) spectrum of **3** in  $C_5D_5N$  (150 MHz)

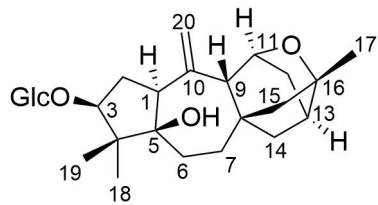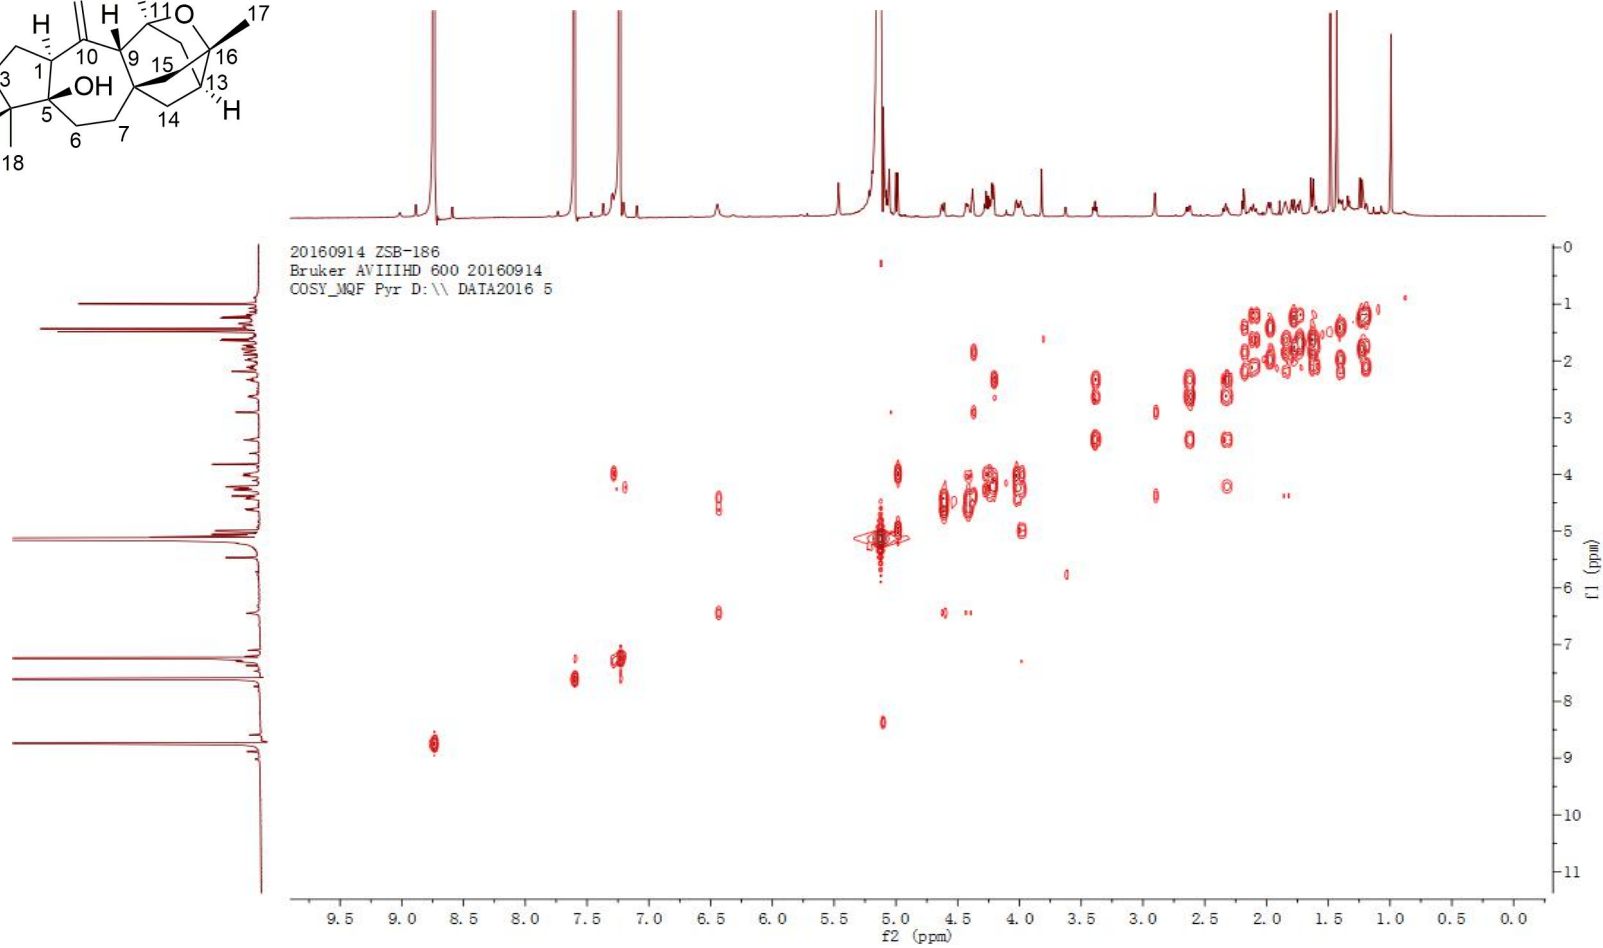

The COSY spectrum of **3** in C<sub>5</sub>D<sub>5</sub>N (600 MHz)



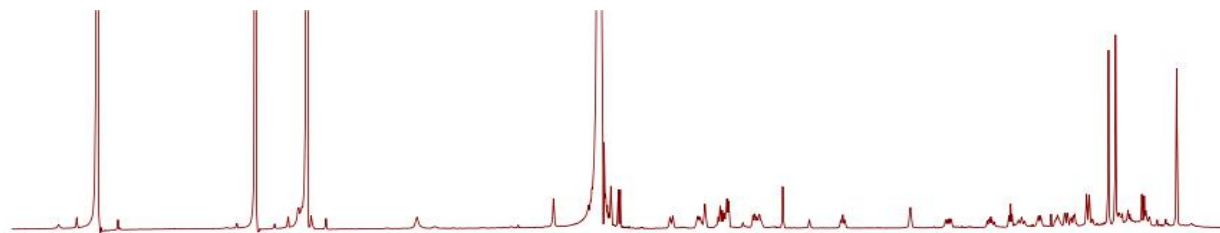

20160914 ZSB-186  
 Bruker AVIIIHD 600 20160914  
 HSQC Pyr D:\ DATA2016 5

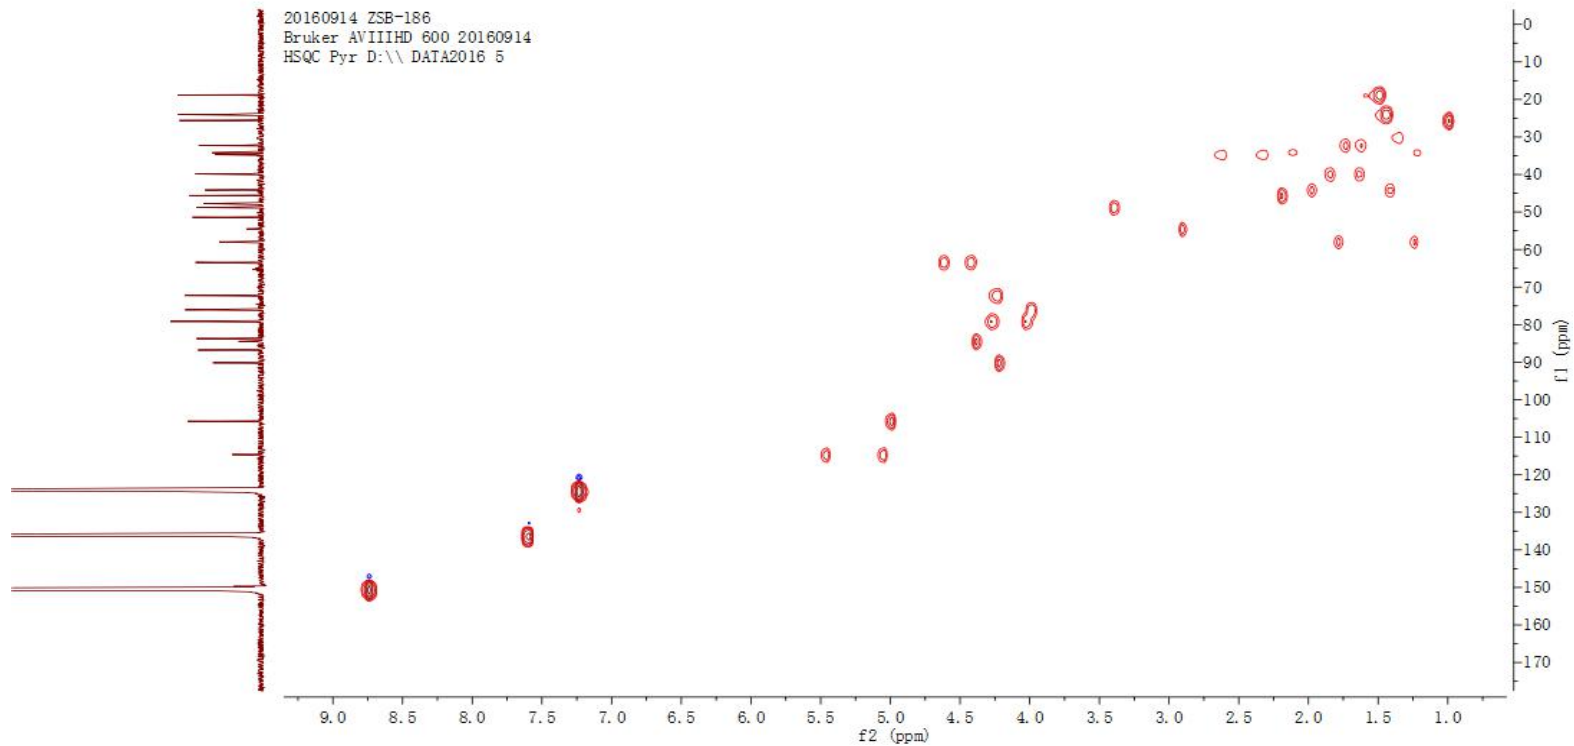

The HSQC of **3** in  $C_5D_5N$  ( $^1H$ : 600 MHz,  $^{13}C$ : 150 MHz)

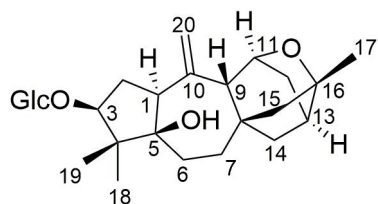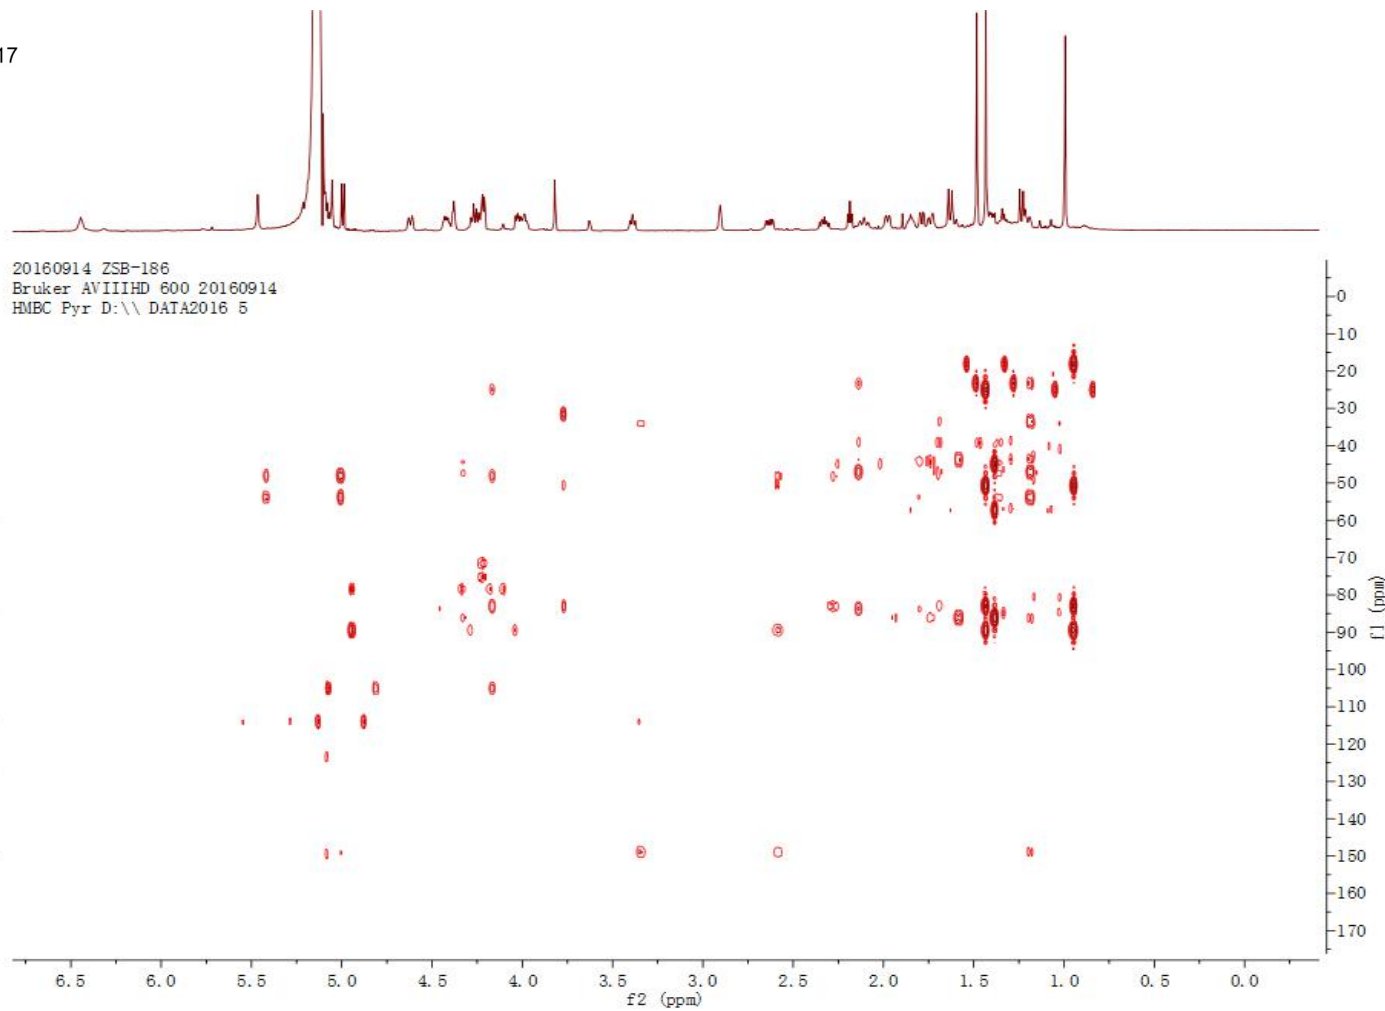

The HMBC spectrum of **3** in C<sub>5</sub>D<sub>5</sub>N (<sup>1</sup>H: 600 MHz, <sup>13</sup>C: 150 MHz)

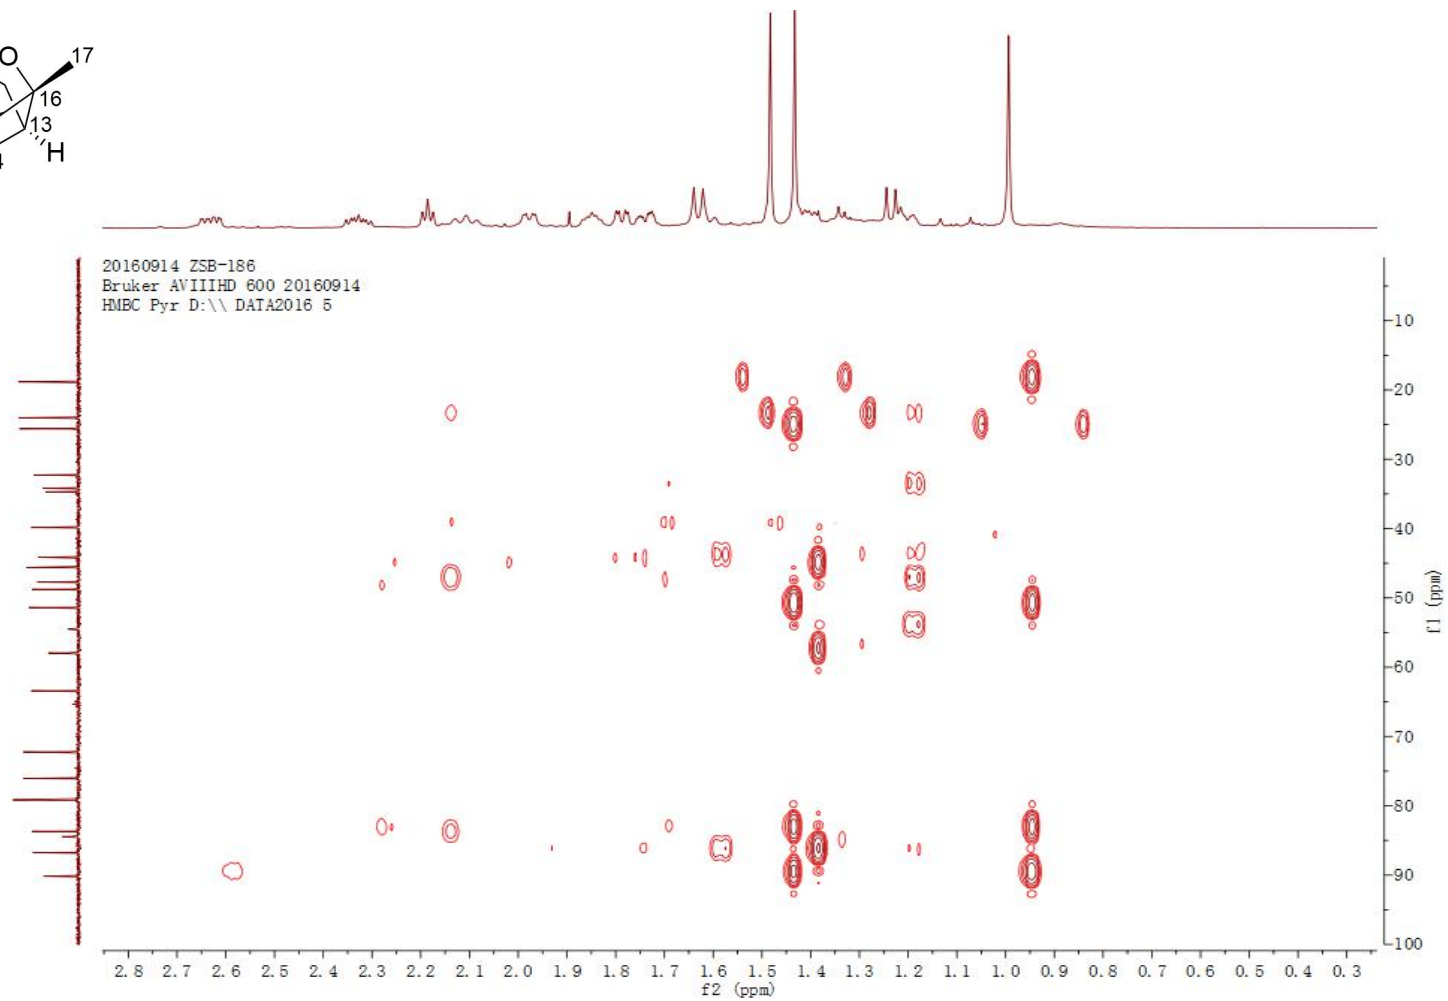

The HMBC spectrum (amplified) of **3** in  $C_5D_5N$  ( $^1H$ : 600 MHz,  $^{13}C$ : 150 MHz)

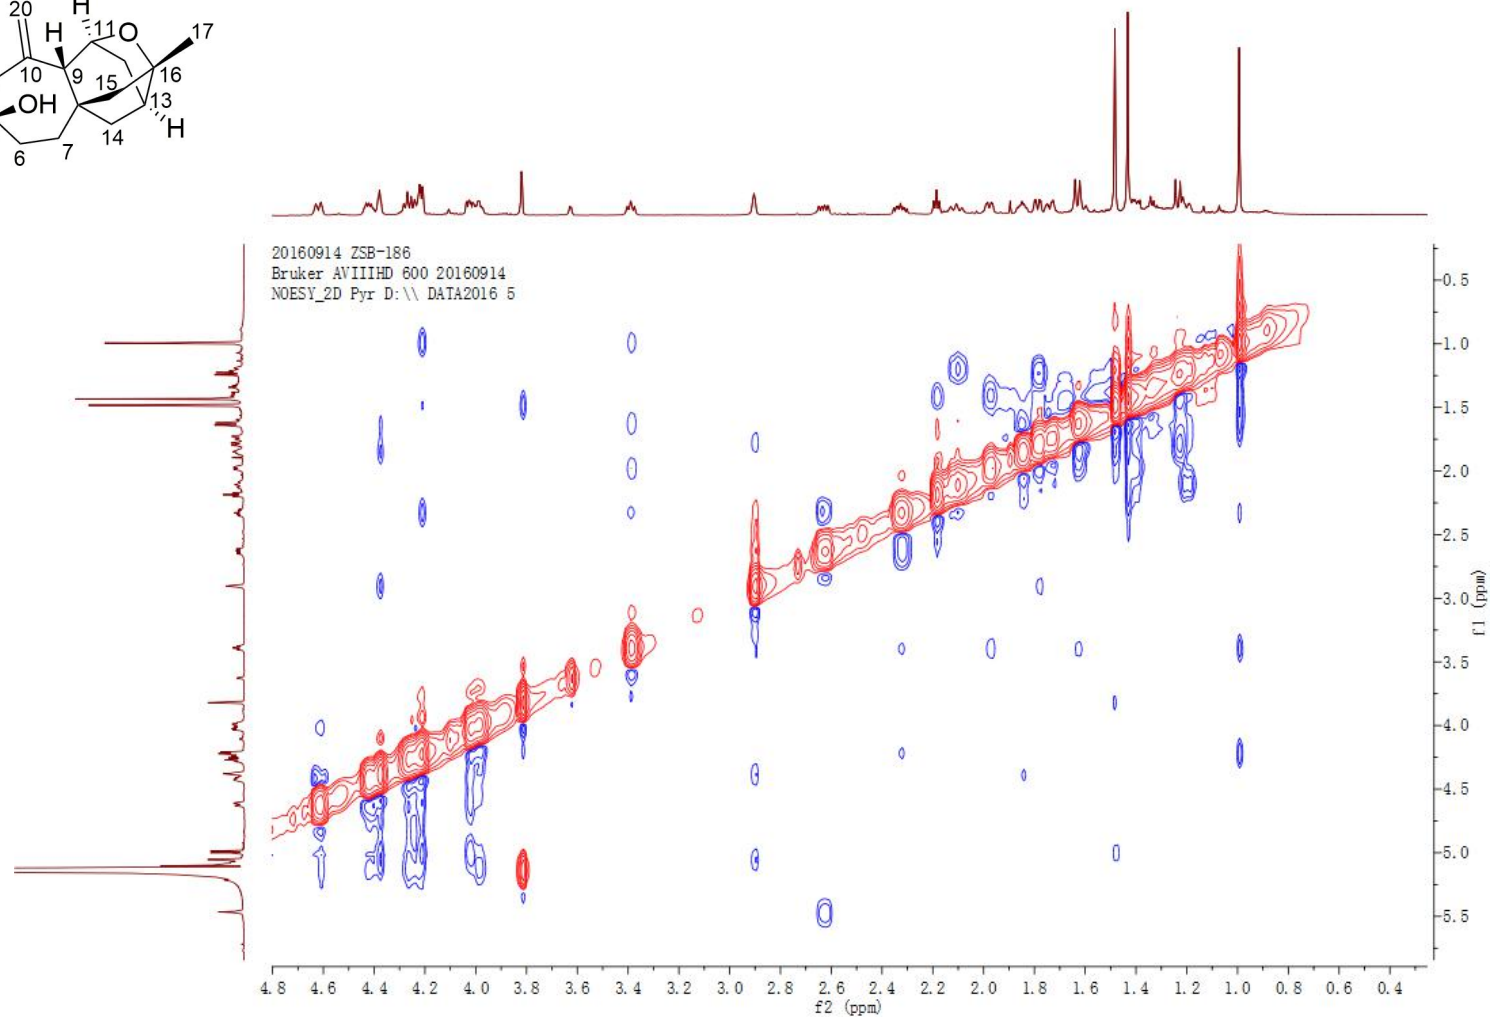

The NOESY spectrum of **3** in C<sub>5</sub>D<sub>5</sub>N (600 MHz)

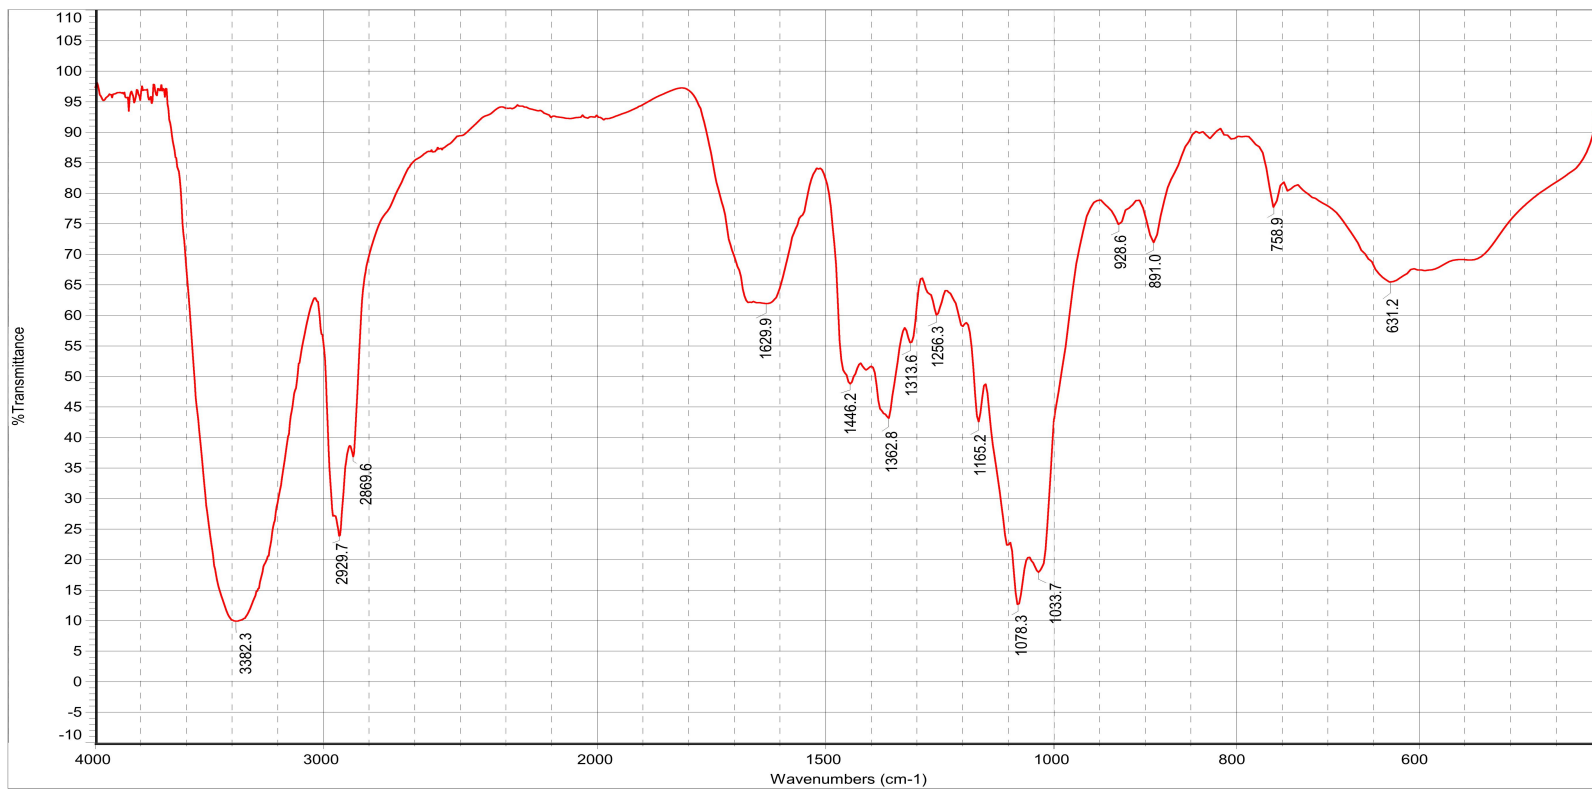

日期: 星期一 1月 16 09:57:50 2017 (GMT+08:00) Sample Name : ZSB - 162

( 显微镜透射法 FT- IR Micro

扫描次数: 100

傅立叶变换显微镜红外(FT-IR Microscope): Centaurus

分辨率: 8.000

美国热电公司(Thermo)傅立叶变换红外光谱仪:Nicolet 5700

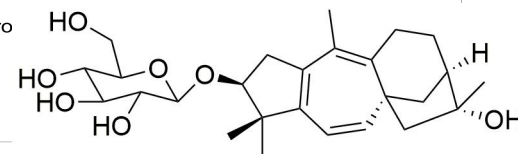

The IR spectrum of 4

MS Formula Results: + Scan (7.432 min) Sub (2016050405.d)

| m/z      | Ion                 | Formula                                          | Abundance |
|----------|---------------------|--------------------------------------------------|-----------|
| 485.2492 | (M+Na) <sup>+</sup> | C <sub>26</sub> H <sub>38</sub> NaO <sub>7</sub> | 510472.4  |

  

| Best                                | Formula (M)                                                                  | Ion Formula                                                                    | Score | Cross Sco | Mass   | Calc Mass | Calc m/z | Diff (ppm) | Abs Diff (ppm) | Mass Match | Abund Match | Spacing Match | DBE |
|-------------------------------------|------------------------------------------------------------------------------|--------------------------------------------------------------------------------|-------|-----------|--------|-----------|----------|------------|----------------|------------|-------------|---------------|-----|
| <input checked="" type="checkbox"/> | C <sub>26</sub> H <sub>38</sub> O <sub>7</sub>                               | C <sub>26</sub> H <sub>38</sub> NaO <sub>7</sub>                               | 99.7  |           | 462.26 | 462.2618  | 485.251  | 3.81       | 3.81           | 99.55      | 99.71       | 99.97         | 8   |
| <input type="checkbox"/>            | C <sub>21</sub> H <sub>38</sub> N <sub>2</sub> O <sub>9</sub>                | C <sub>21</sub> H <sub>38</sub> N <sub>2</sub> NaO <sub>9</sub>                | 99.44 |           | 462.26 | 462.2577  | 485.247  | -4.9       | 4.9            | 99.26      | 99.3        | 99.99         | 4   |
| <input type="checkbox"/>            | C <sub>30</sub> H <sub>38</sub> O <sub>2</sub> S                             | C <sub>30</sub> H <sub>38</sub> NaO <sub>2</sub> S                             | 98.74 |           | 462.26 | 462.2593  | 485.2485 | -1.61      | 1.61           | 99.92      | 95.83       | 99.86         | 12  |
| <input type="checkbox"/>            | C <sub>22</sub> H <sub>42</sub> N <sub>2</sub> O <sub>4</sub> S <sub>2</sub> | C <sub>22</sub> H <sub>42</sub> N <sub>2</sub> NaO <sub>4</sub> S <sub>2</sub> | 97.65 |           | 462.26 | 462.2586  | 485.2478 | -3.04      | 3.04           | 99.71      | 92.71       | 99.44         | 3   |
| <input type="checkbox"/>            | C <sub>27</sub> H <sub>42</sub> O <sub>2</sub> S <sub>2</sub>                | C <sub>27</sub> H <sub>42</sub> NaO <sub>2</sub> S <sub>2</sub>                | 97.28 |           | 462.26 | 462.2626  | 485.2518 | 5.67       | 5.67           | 99.01      | 92.49       | 99.56         | 7   |

page 1

The HRESIMS spectrum of 4

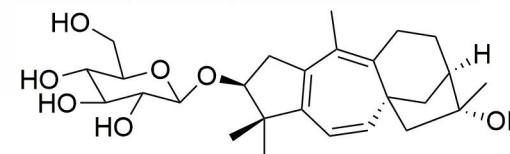

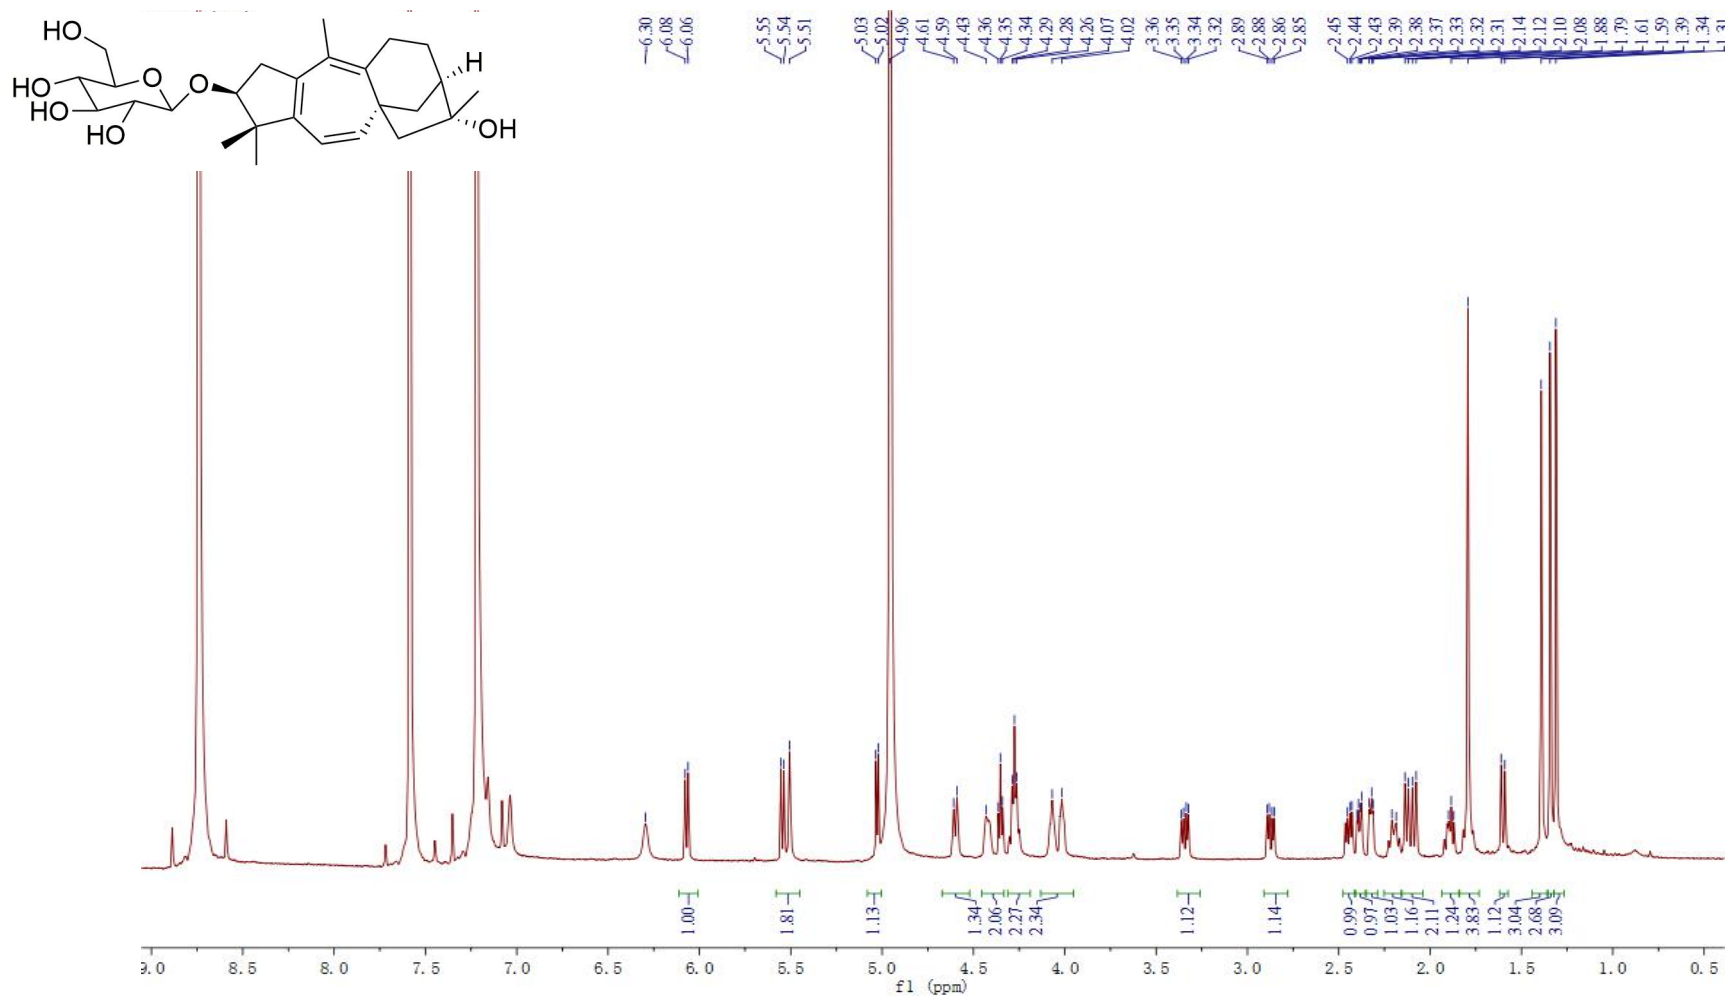

The <sup>1</sup>H NMR spectrum of **4** in C<sub>5</sub>D<sub>5</sub>N (600 MHz)

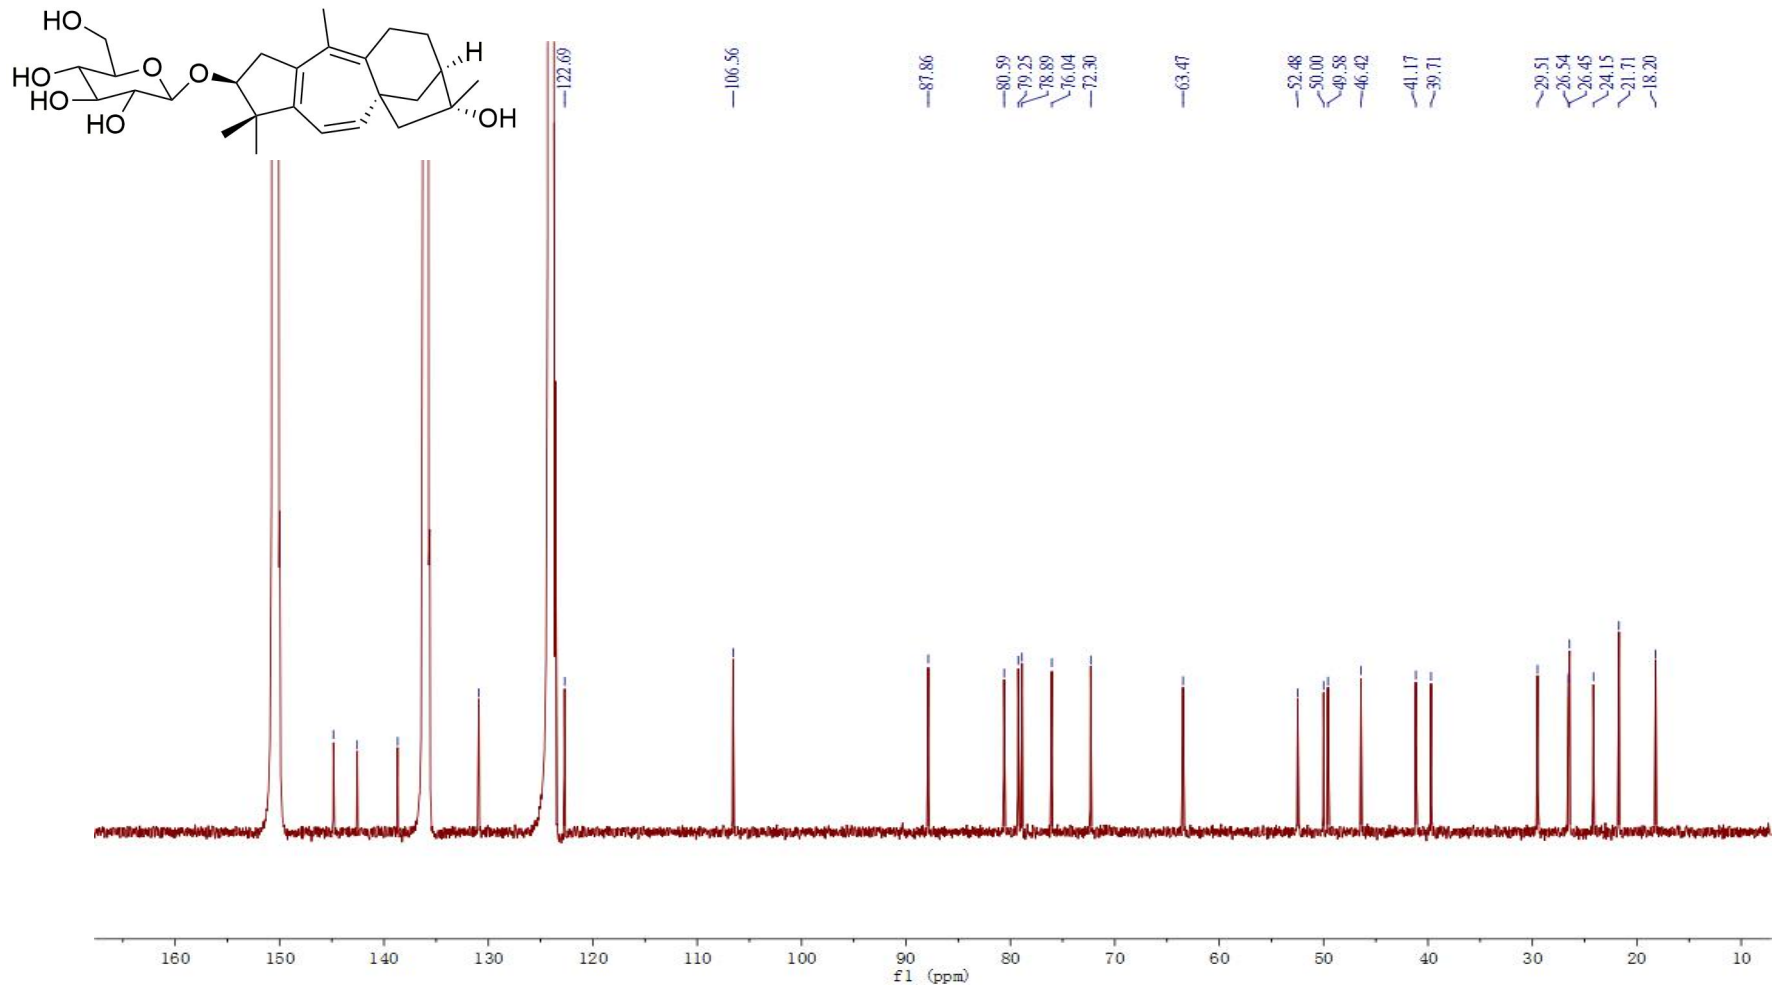

The  $^{13}\text{C}$  NMR spectrum of 4 in  $\text{C}_5\text{D}_5\text{N}$  (150 MHz)



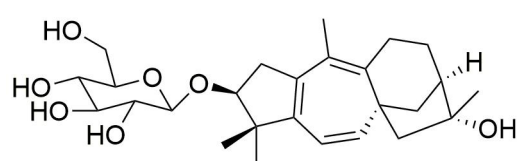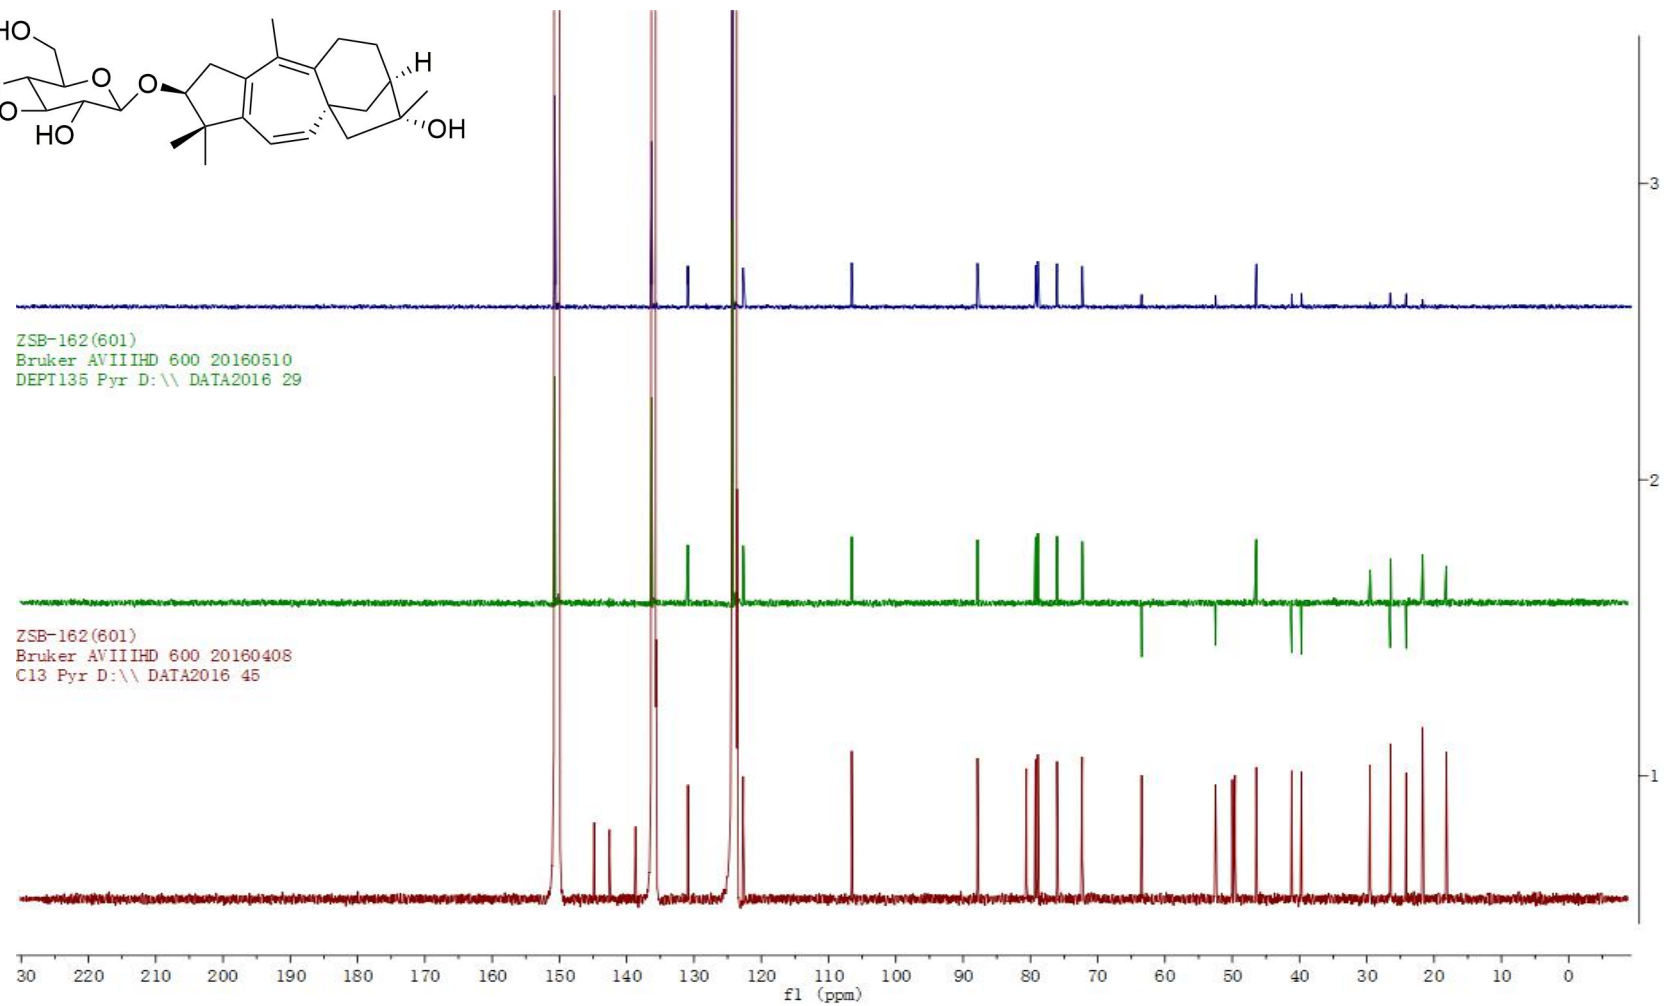

The DEPT spectrum of 4 in C<sub>5</sub>D<sub>5</sub>N (150 MHz)

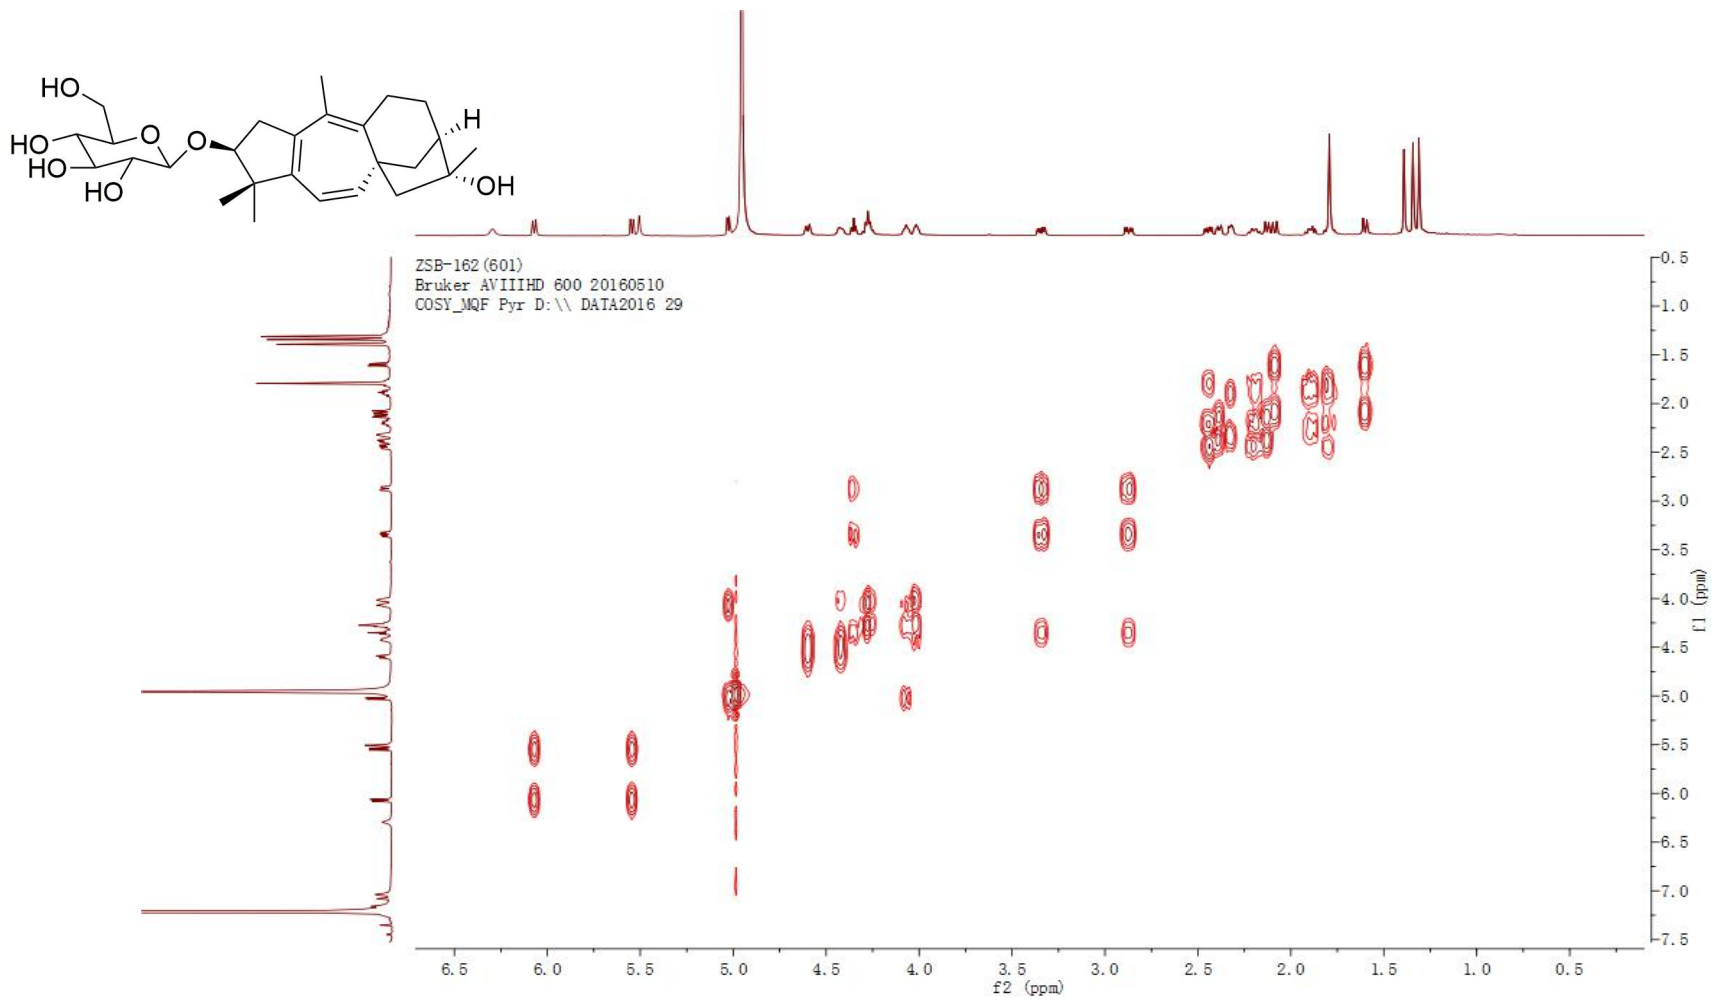

The COSY spectrum of 4 in  $C_5D_5N$  (600 MHz)

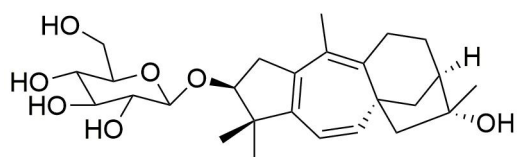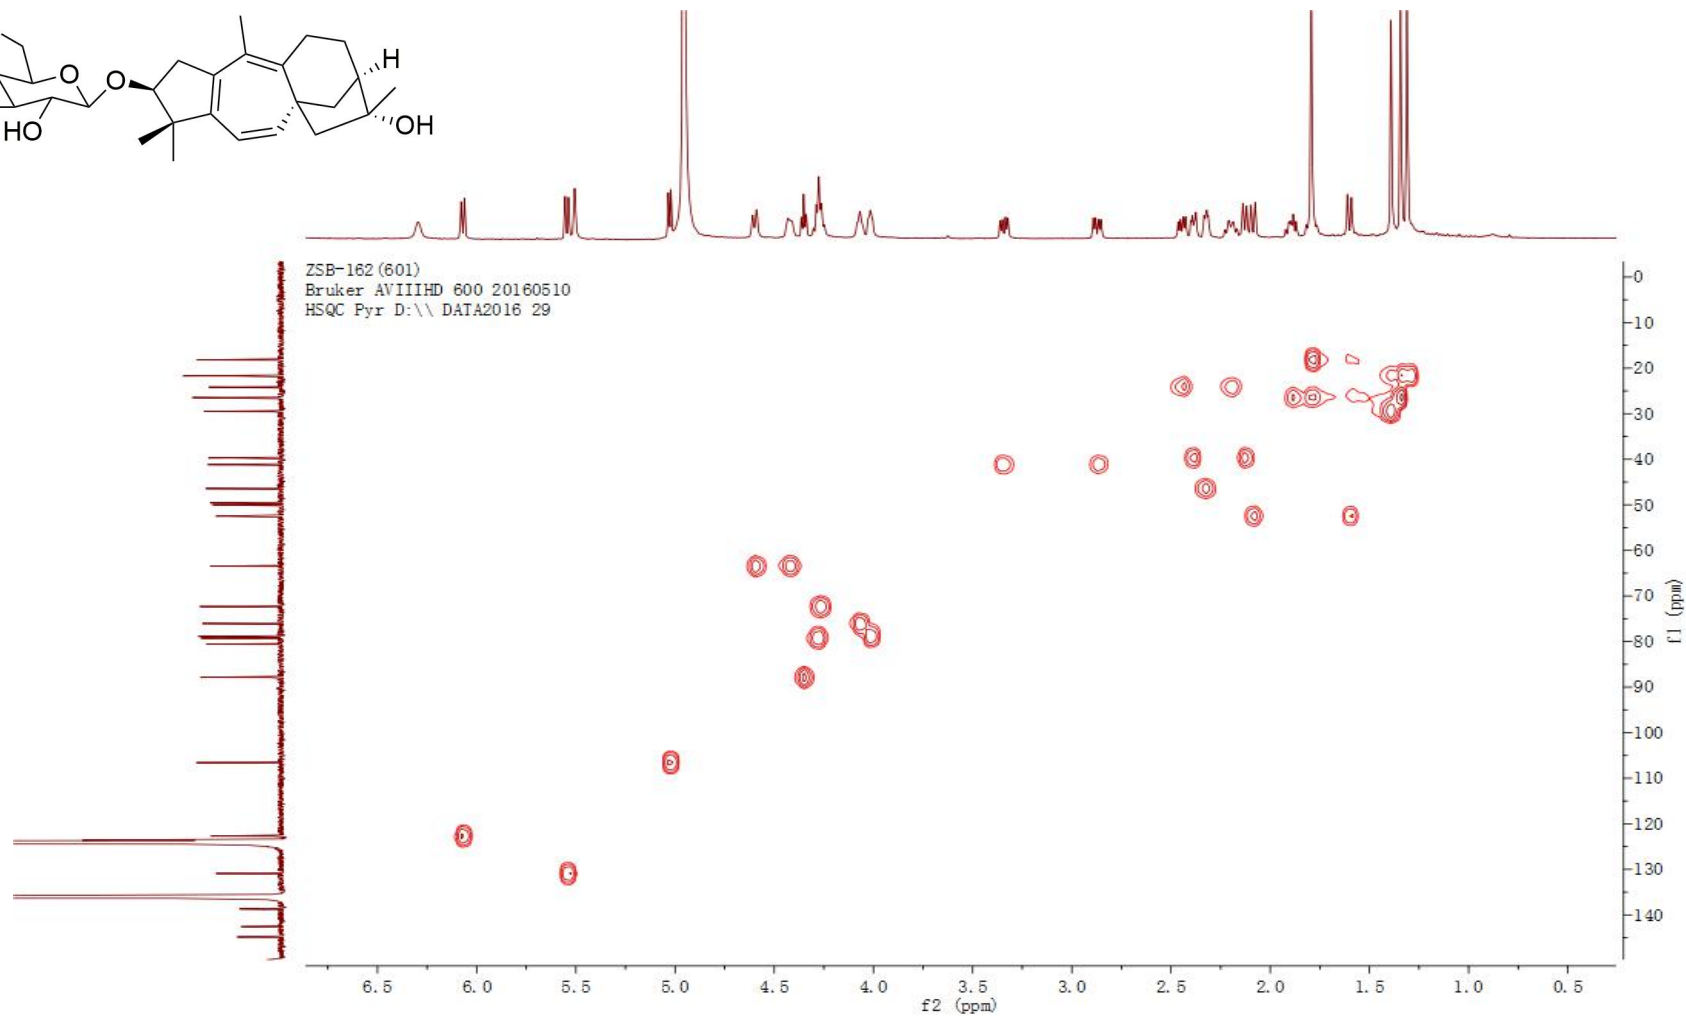

The HSQC spectrum of **4** in  $\text{C}_5\text{D}_5\text{N}$  ( $^1\text{H}$ : 600 MHz,  $^{13}\text{C}$ : 150 MHz)

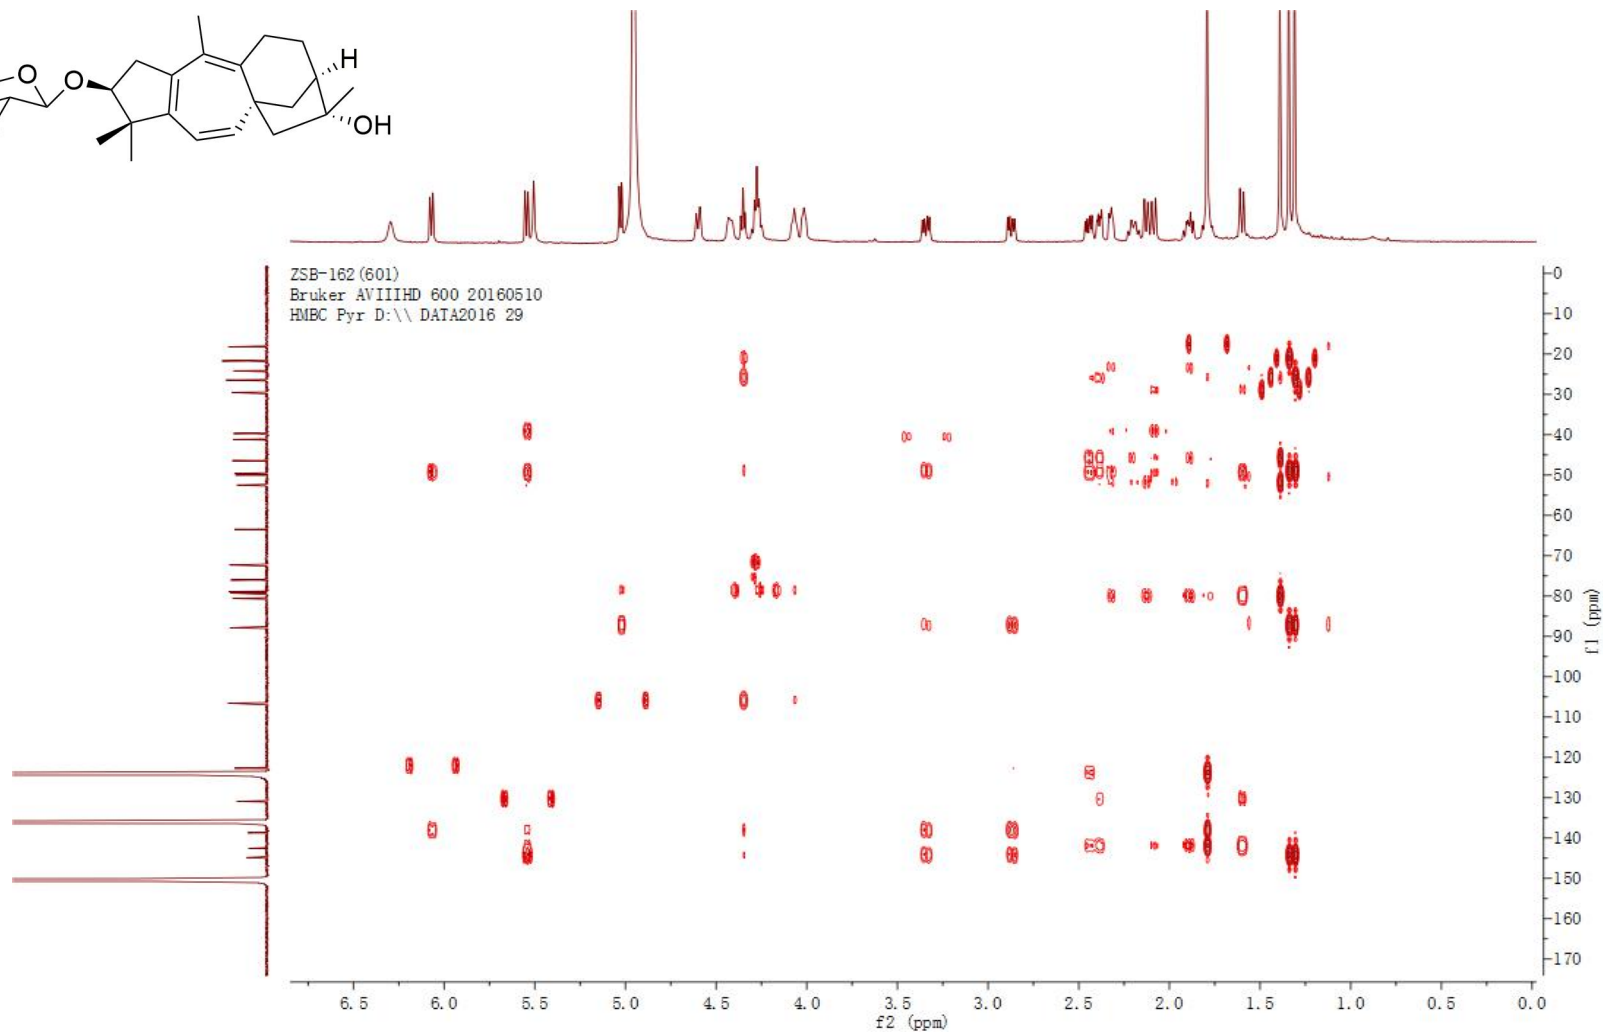

The HMBC spectrum of **4** in  $C_5D_5N$  ( $^1H$ : 600 MHz,  $^{13}C$ : 150 MHz)

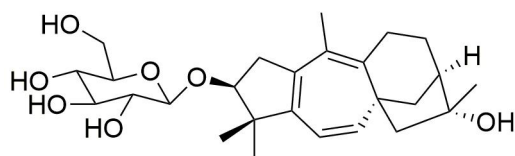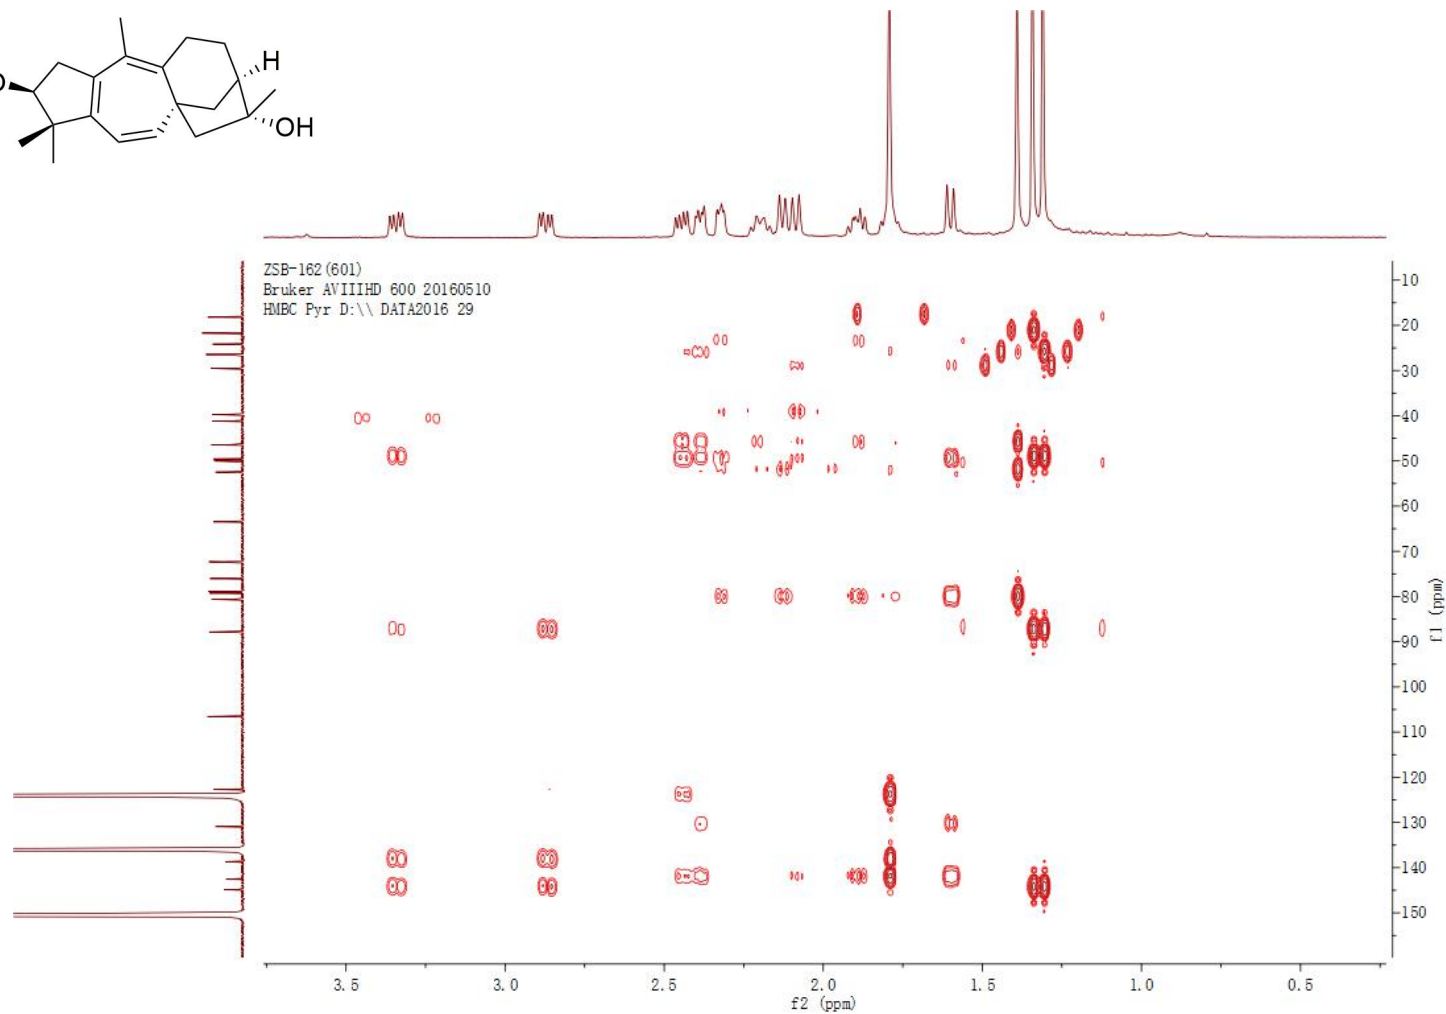

The HMBC spectrum (amplified) of **4** in  $\text{C}_5\text{D}_5\text{N}$  ( $^1\text{H}$ : 600 MHz,  $^{13}\text{C}$ : 150 MHz)

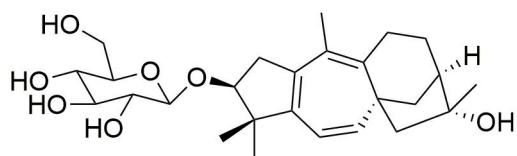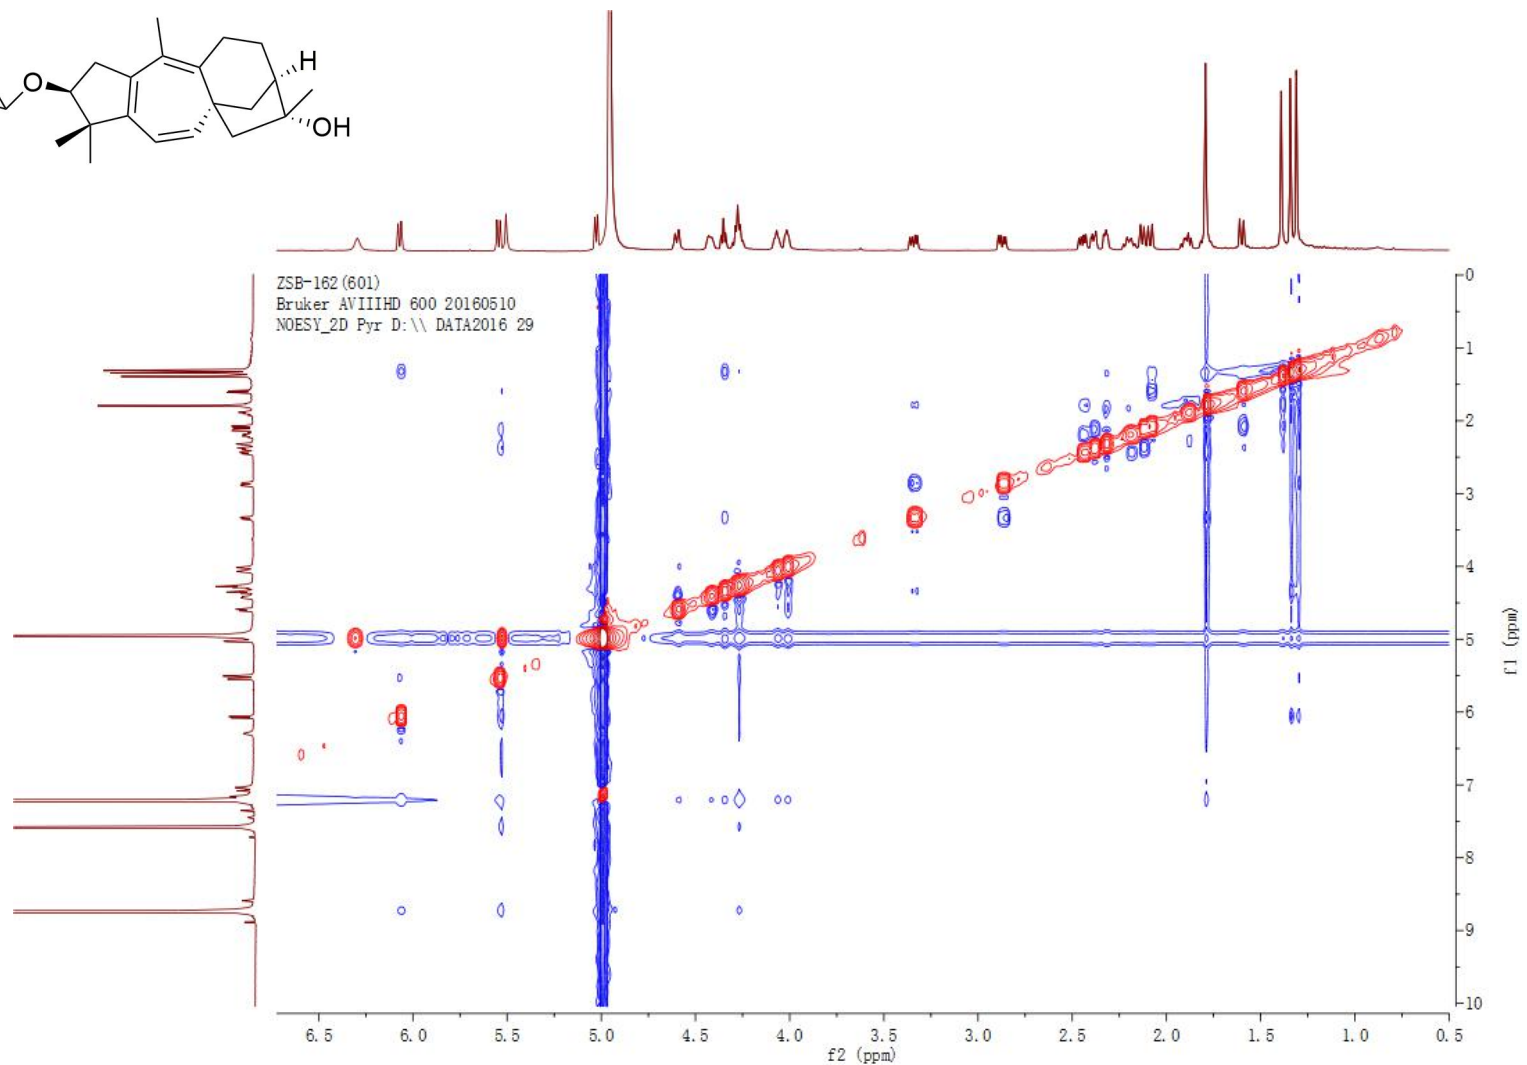

The NOESY spectrum of **4** in C<sub>5</sub>D<sub>5</sub>N (600 MHz)

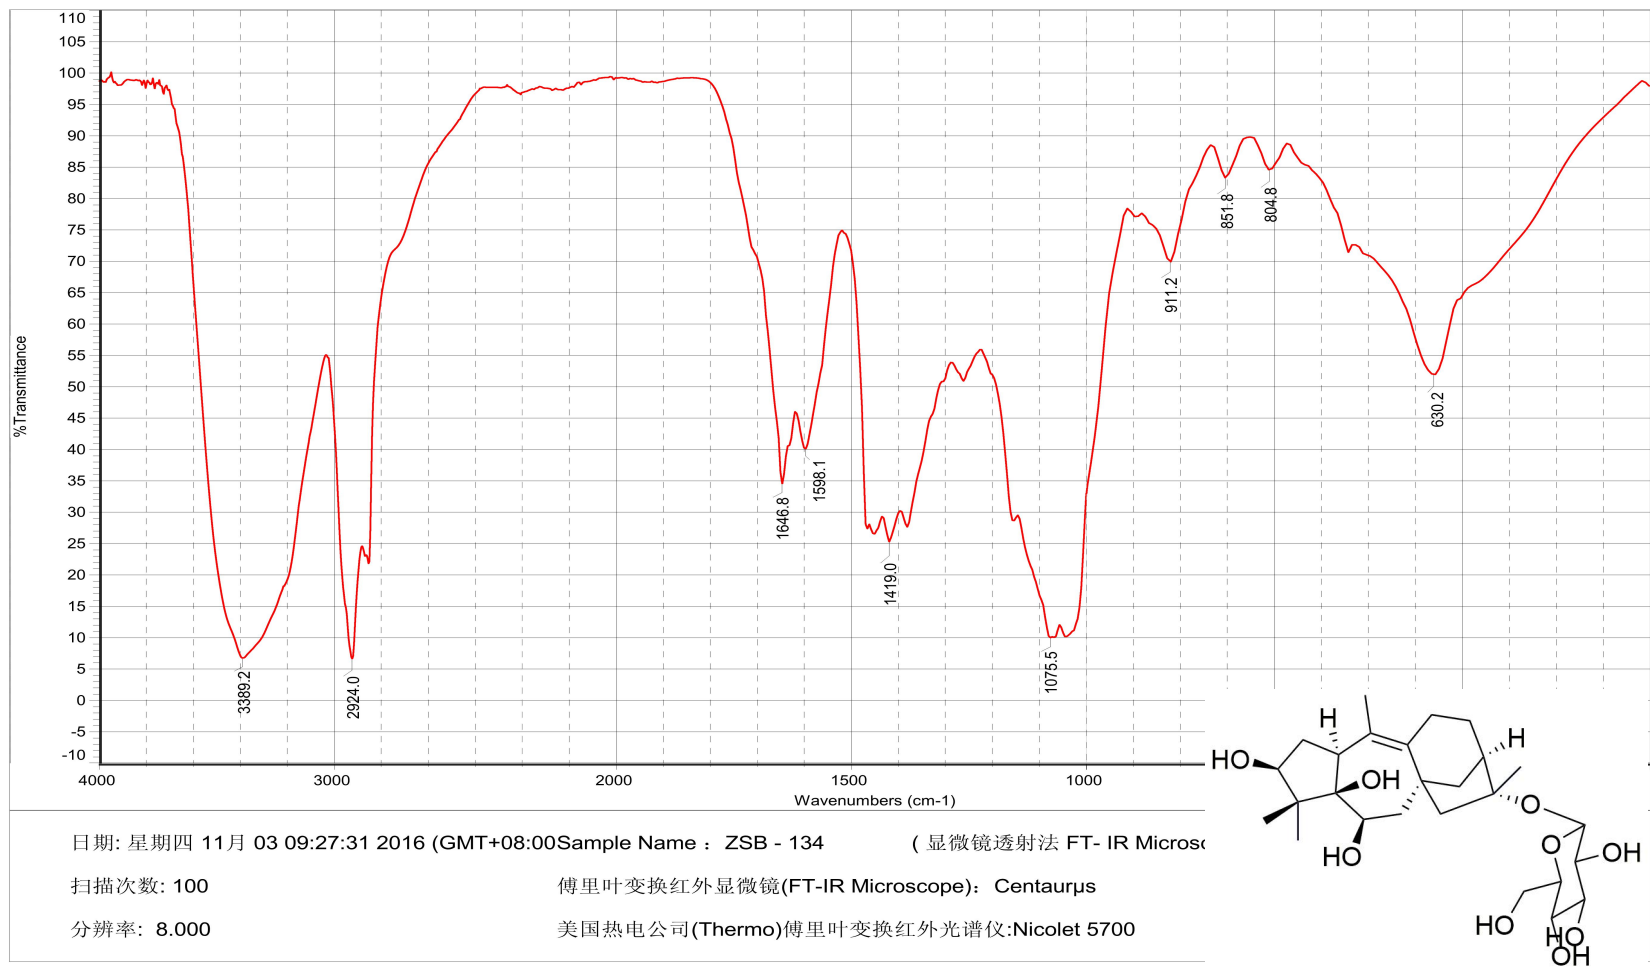

The IR spectrum of 5

MS Formula Results: + Scan (6.410 min) Sub (2016032905.d)

| m/z      | Ion                 | Formula       | Abundance |
|----------|---------------------|---------------|-----------|
| 521.2722 | (M+Na) <sup>+</sup> | C26 H42 Na O9 | 182458.1  |

  

| Best                                | Formula (M)          | Ion Formula             | Score | Cross Sco | Mass    | Calc Mass | Calc m/z | Diff (ppm) | Abs Diff (ppm) | Mass Match | Abund Match | Spacing Match | DBE |
|-------------------------------------|----------------------|-------------------------|-------|-----------|---------|-----------|----------|------------|----------------|------------|-------------|---------------|-----|
| <input checked="" type="checkbox"/> | C26 H42 O9           | C26 H42 Na O9           | 99.85 |           | 498.283 | 498.2829  | 521.2721 | -0.27      | 0.27           | 100        | 99.65       | 99.79         | 6   |
| <input type="checkbox"/>            | C30 H42 O4 S         | C30 H42 Na O4 S         | 98.5  |           | 498.283 | 498.2804  | 521.2696 | -5.29      | 5.29           | 99.12      | 96.22       | 99.99         | 10  |
| <input type="checkbox"/>            | C27 H46 O4 S2        | C27 H46 Na O4 S2        | 98    |           | 498.283 | 498.2838  | 521.273  | 1.47       | 1.47           | 99.93      | 93.24       | 99.84         | 5   |
| <input type="checkbox"/>            | C26 H46 O5 S Si      | C26 H46 Na O5 S Si      | 97.81 |           | 498.283 | 498.2835  | 521.2727 | 0.99       | 0.99           | 99.97      | 92.48       | 99.9          | 5   |
| <input type="checkbox"/>            | C29 H42 O5 Si        | C29 H42 Na O5 Si        | 97.65 |           | 498.283 | 498.2802  | 521.2694 | -5.77      | 5.77           | 98.96      | 93.51       | 99.99         | 10  |
| <input type="checkbox"/>            | C25 H46 O6 Si2       | C25 H46 Na O6 Si2       | 97.24 |           | 498.283 | 498.2833  | 521.2725 | 0.51       | 0.51           | 99.99      | 90.45       | 99.91         | 5   |
| <input type="checkbox"/>            | C30 H46 S2 Si        | C30 H46 Na S2 Si        | 95    |           | 498.283 | 498.281   | 521.2702 | -4.04      | 4.04           | 99.49      | 83.5        | 99.82         | 9   |
| <input type="checkbox"/>            | C29 H46 O S Si2      | C29 H46 Na O S Si2      | 94.3  |           | 498.283 | 498.2808  | 521.27   | -4.51      | 4.51           | 99.36      | 81.26       | 99.84         | 9   |
| <input type="checkbox"/>            | C21 H50 N2 O3 S2 Si2 | C21 H50 N2 Na O3 S2 Si2 | 93.78 |           | 498.283 | 498.2801  | 521.2694 | -5.83      | 5.83           | 98.93      | 80.35       | 99.58         | 0   |
| <input type="checkbox"/>            | C26 H50 O S2 Si2     | C26 H50 Na O S2 Si2     | 93.44 |           | 498.283 | 498.2842  | 521.2734 | 2.25       | 2.25           | 99.84      | 77.55       | 99.7          | 4   |
| <input type="checkbox"/>            | C28 H46 O2 Si3       | C28 H46 Na O2 Si3       | 93.4  |           | 498.283 | 498.2806  | 521.2698 | -4.98      | 4.98           | 99.22      | 78.33       | 99.83         | 9   |
| <input type="checkbox"/>            | C25 H50 O2 S Si3     | C25 H50 Na O2 S Si3     | 93    |           | 498.283 | 498.2839  | 521.2732 | 1.78       | 1.78           | 99.9       | 75.92       | 99.69         | 4   |
| <input type="checkbox"/>            | C33 H39 Cl N2        | C33 H39 Cl N2 Na        | 85.11 |           | 498.283 | 498.2802  | 521.2694 | -5.71      | 5.71           | 98.98      | 49.84       | 99.71         | 15  |
| <input type="checkbox"/>            | C29 H43 Cl N2 O Si   | C29 H43 Cl N2 Na O Si   | 84.06 |           | 498.283 | 498.2833  | 521.2725 | 0.58       | 0.58           | 99.99      | 44.51       | 99.66         | 10  |
| <input type="checkbox"/>            | C30 H43 Cl N2 S      | C30 H43 Cl N2 Na S      | 83.58 |           | 498.283 | 498.2835  | 521.2728 | 1.05       | 1.05           | 99.96      | 42.9        | 99.63         | 10  |
| <input type="checkbox"/>            | C32 H44 Cl2          | C32 H44 Cl2 Na          | 75.9  |           | 498.283 | 498.282   | 521.2712 | -2.03      | 2.03           | 99.87      | 16.24       | 99.57         | 10  |
| <input type="checkbox"/>            | C28 H48 Cl2 O Si     | C28 H48 Cl2 Na O Si     | 75.24 |           | 498.283 | 498.2851  | 521.2744 | 4.25       | 4.25           | 99.43      | 14.64       | 99.56         | 5   |
| <input type="checkbox"/>            | C23 H48 Cl2 N2 O3 Si | C23 H48 Cl2 N2 Na O3 Si | 74.91 |           | 498.283 | 498.2811  | 521.2703 | -3.83      | 3.83           | 99.54      | 13.35       | 99.52         | 1   |
| <input type="checkbox"/>            | C29 H48 Cl2 S        | C29 H48 Cl2 Na S        | 74.82 |           | 498.283 | 498.2854  | 521.2746 | 4.73       | 4.73           | 99.3       | 13.42       | 99.54         | 5   |
| <input type="checkbox"/>            | C22 H52 Cl2 N2 Si3   | C22 H52 Cl2 N2 Na Si3   | 74.76 |           | 498.283 | 498.2815  | 521.2708 | -3.04      | 3.04           | 99.71      | 12.64       | 99.38         | 0   |
| <input type="checkbox"/>            | C24 H48 Cl2 N2 O2 S  | C24 H48 Cl2 N2 Na O2 S  | 74.56 |           | 498.283 | 498.2814  | 521.2706 | -3.35      | 3.35           | 99.65      | 11.95       | 99.51         | 1   |

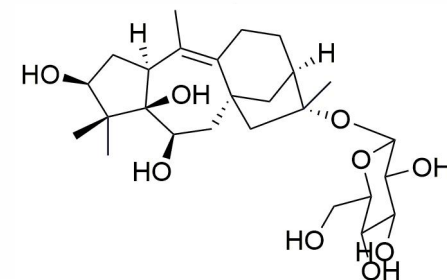

The HRESIMS spectrum of 5



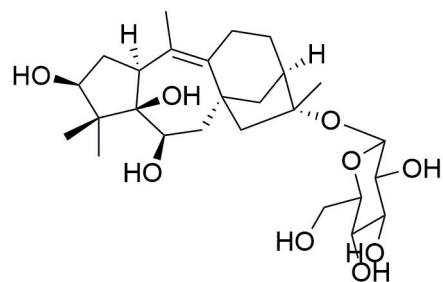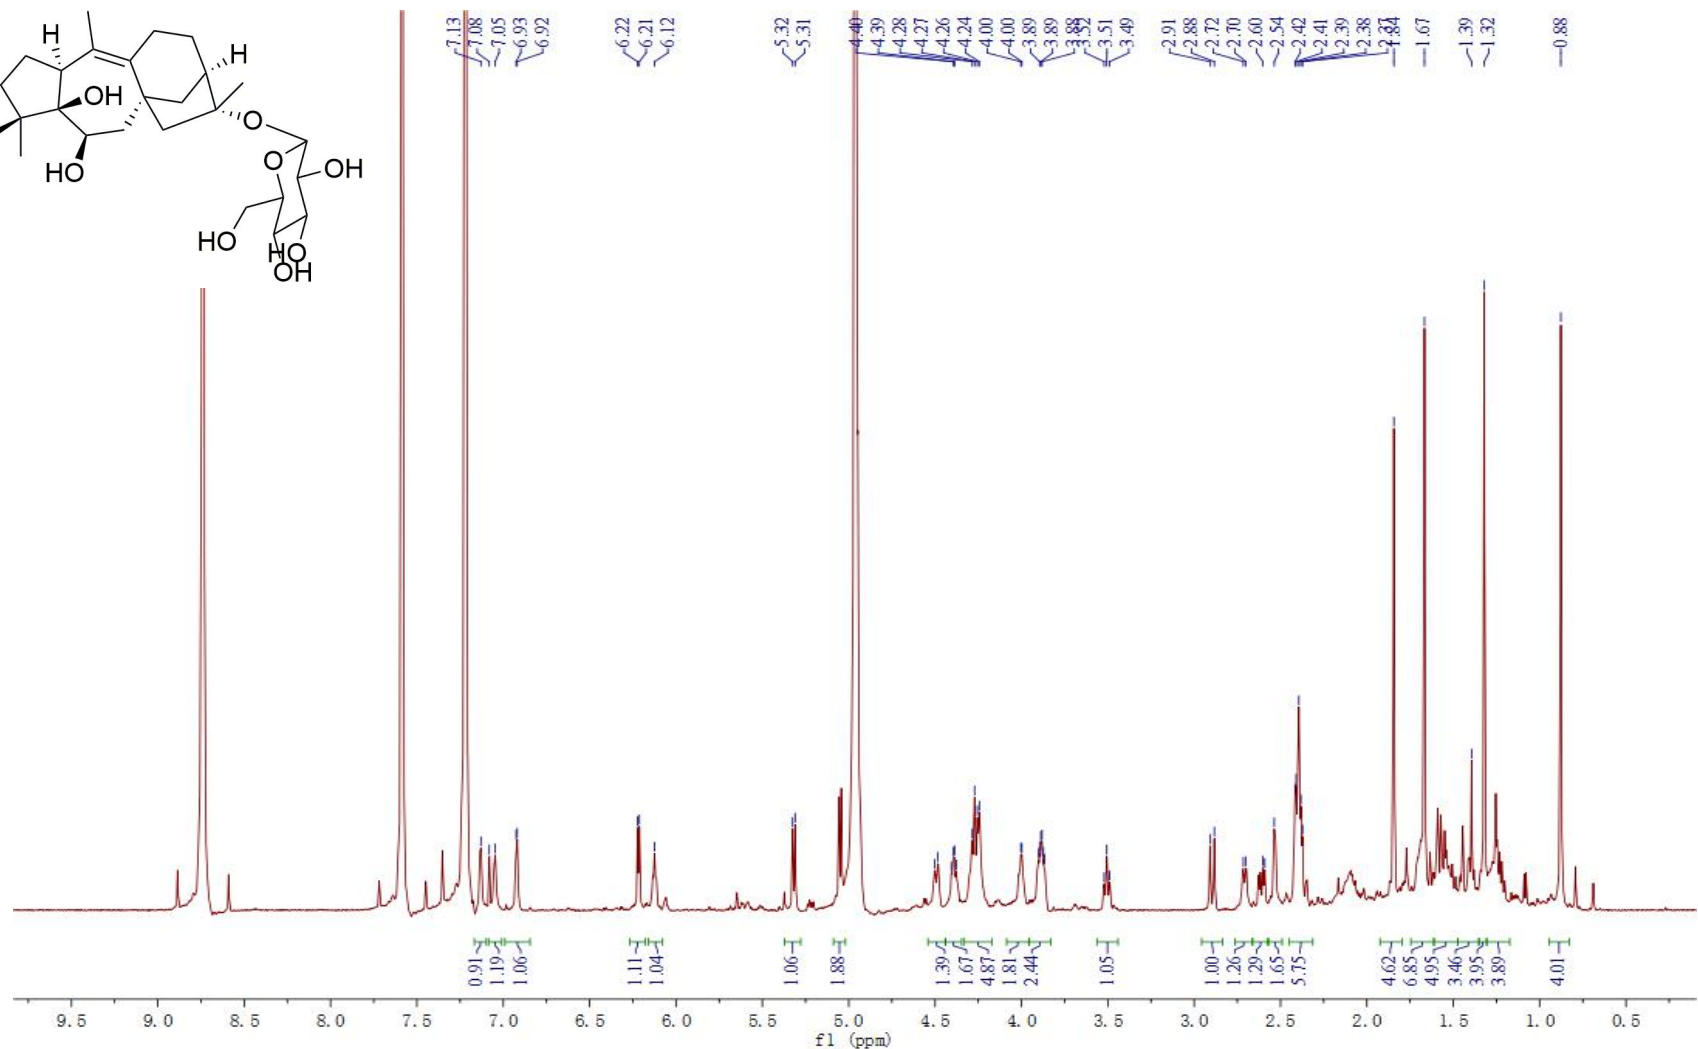

The <sup>1</sup>H NMR spectrum of **5** in C<sub>5</sub>D<sub>5</sub>N (600 MHz)

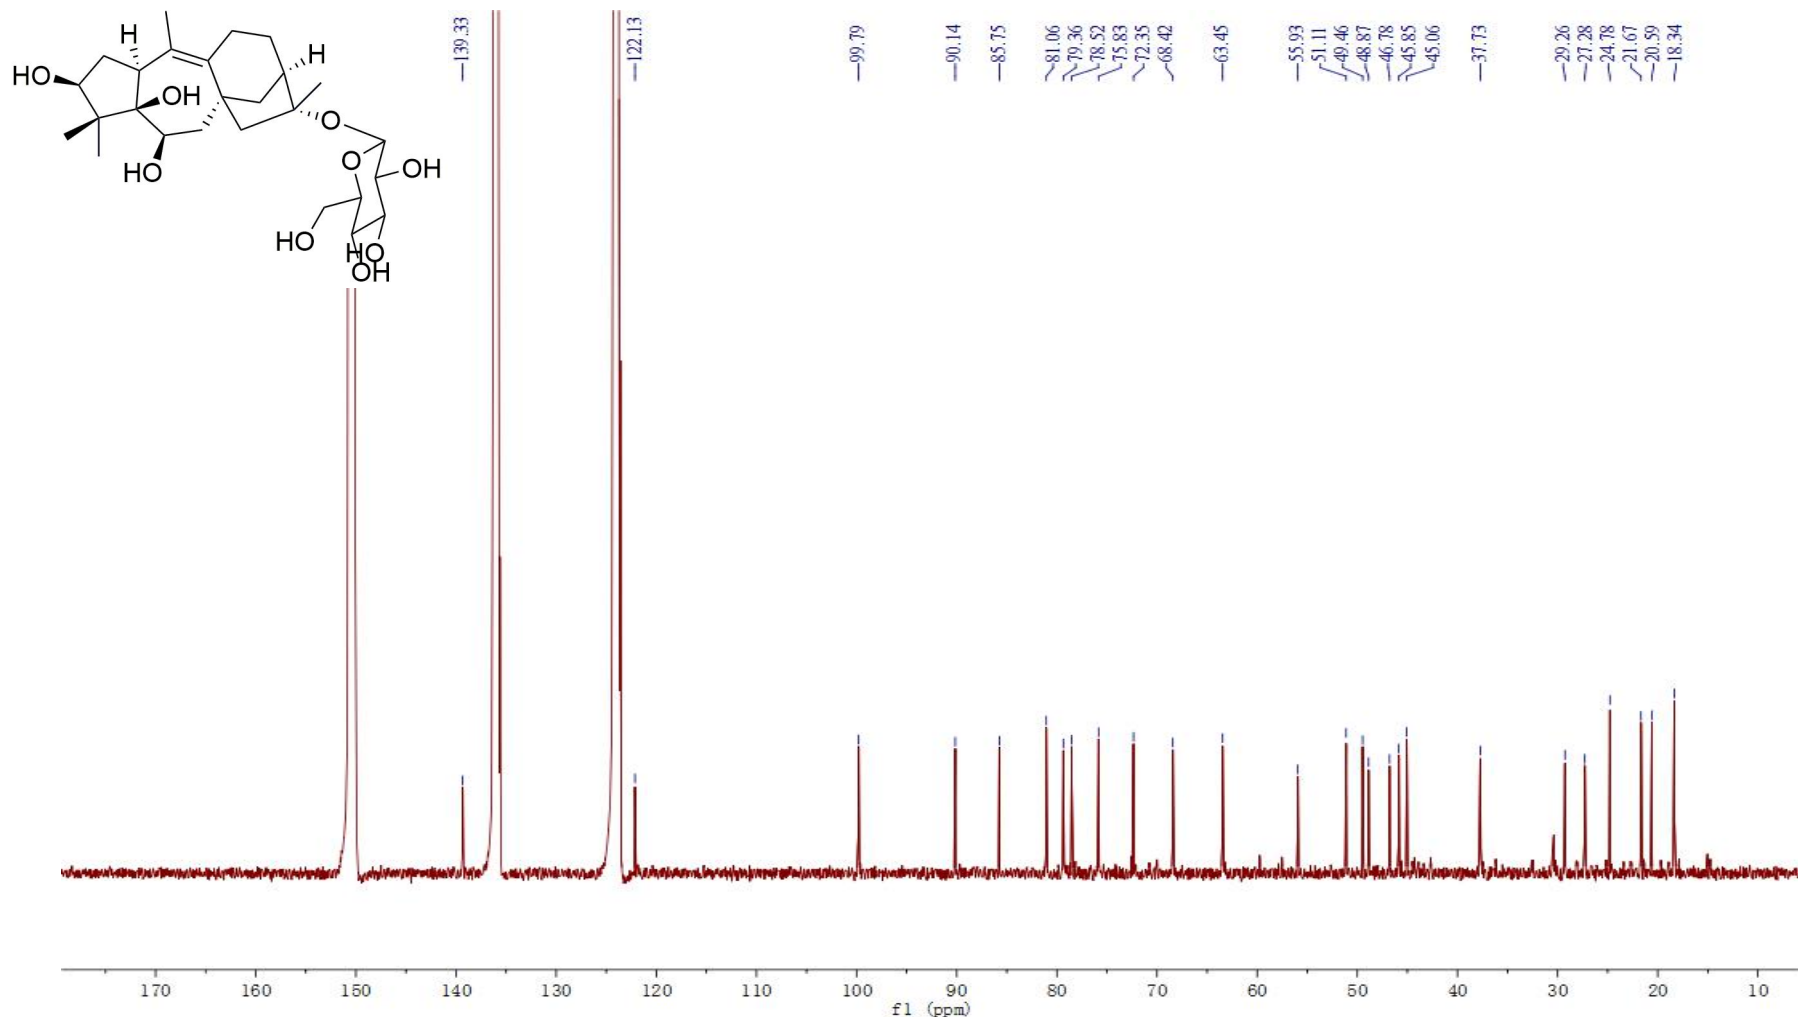

The  $^{13}\text{C}$  NMR spectrum of **5** in  $\text{C}_5\text{D}_5\text{N}$  (150 MHz)



ZSB-134 (601)  
 Bruker AVIIIHD 600 20160408  
 DEPT90 Pyr D:\ DATA2016 44

ZSB-134 (601)  
 Bruker AVIIIHD 600 20160322  
 C13 Pyr D:\ DATA2016 36

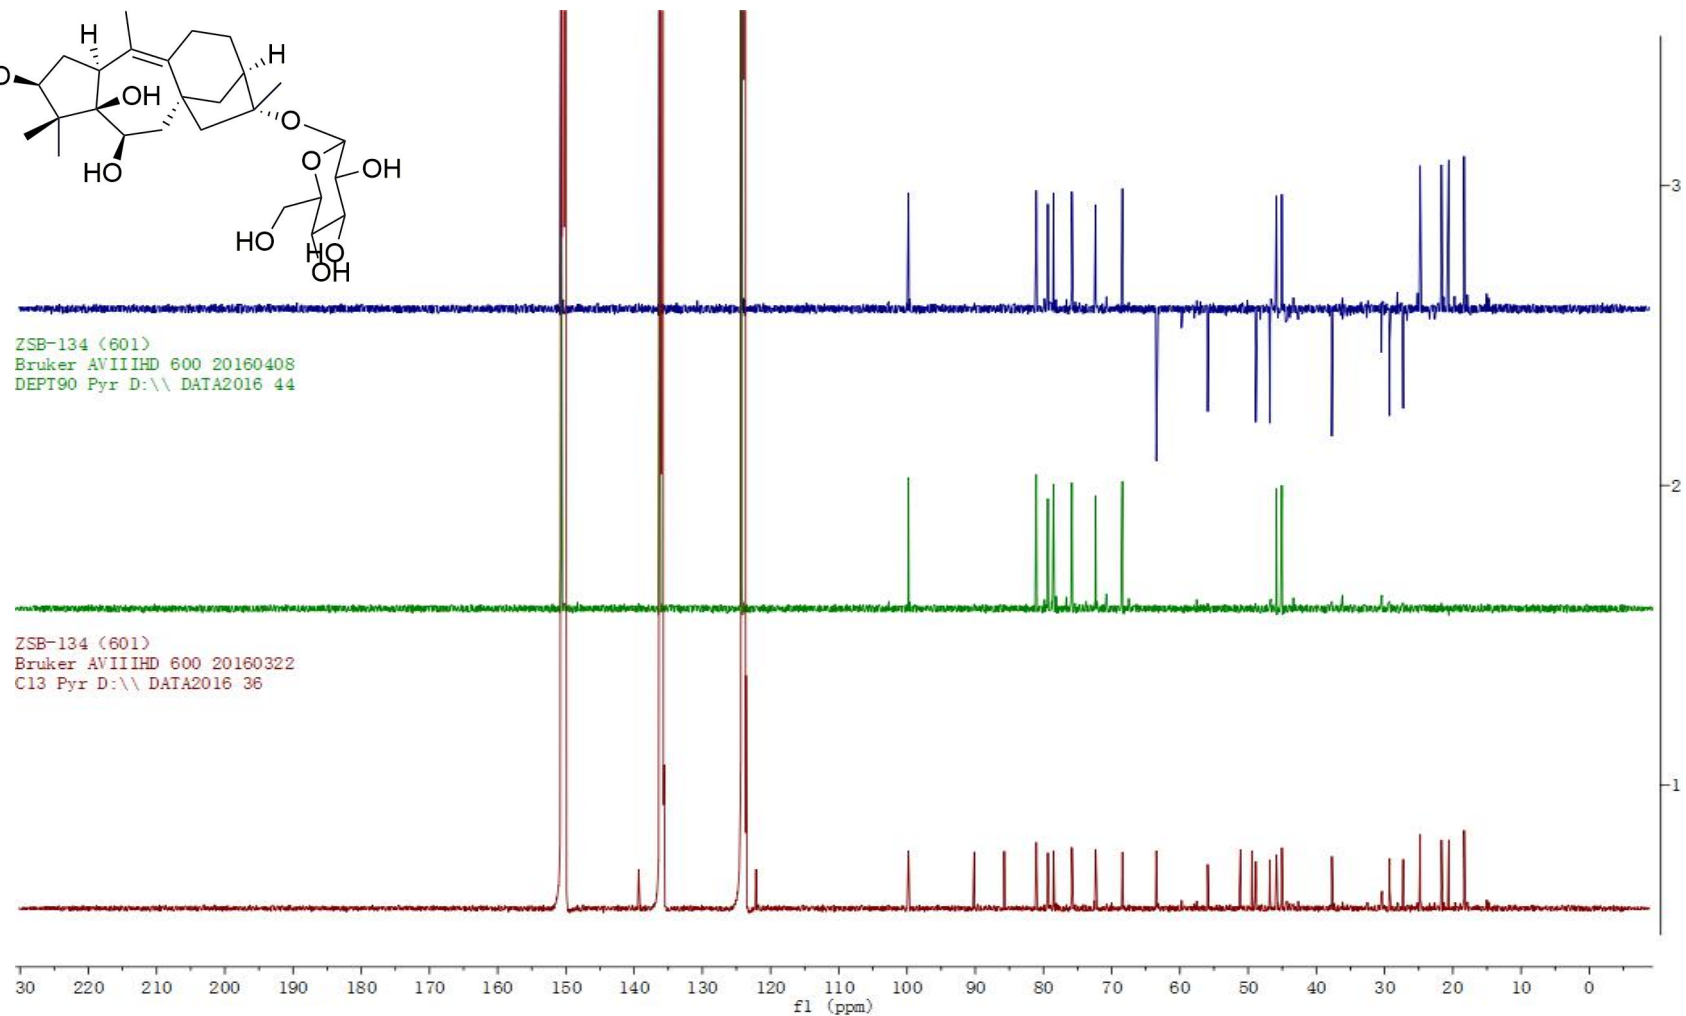

The DEPT spectrum of **5** in C<sub>5</sub>D<sub>5</sub>N (150 MHz)

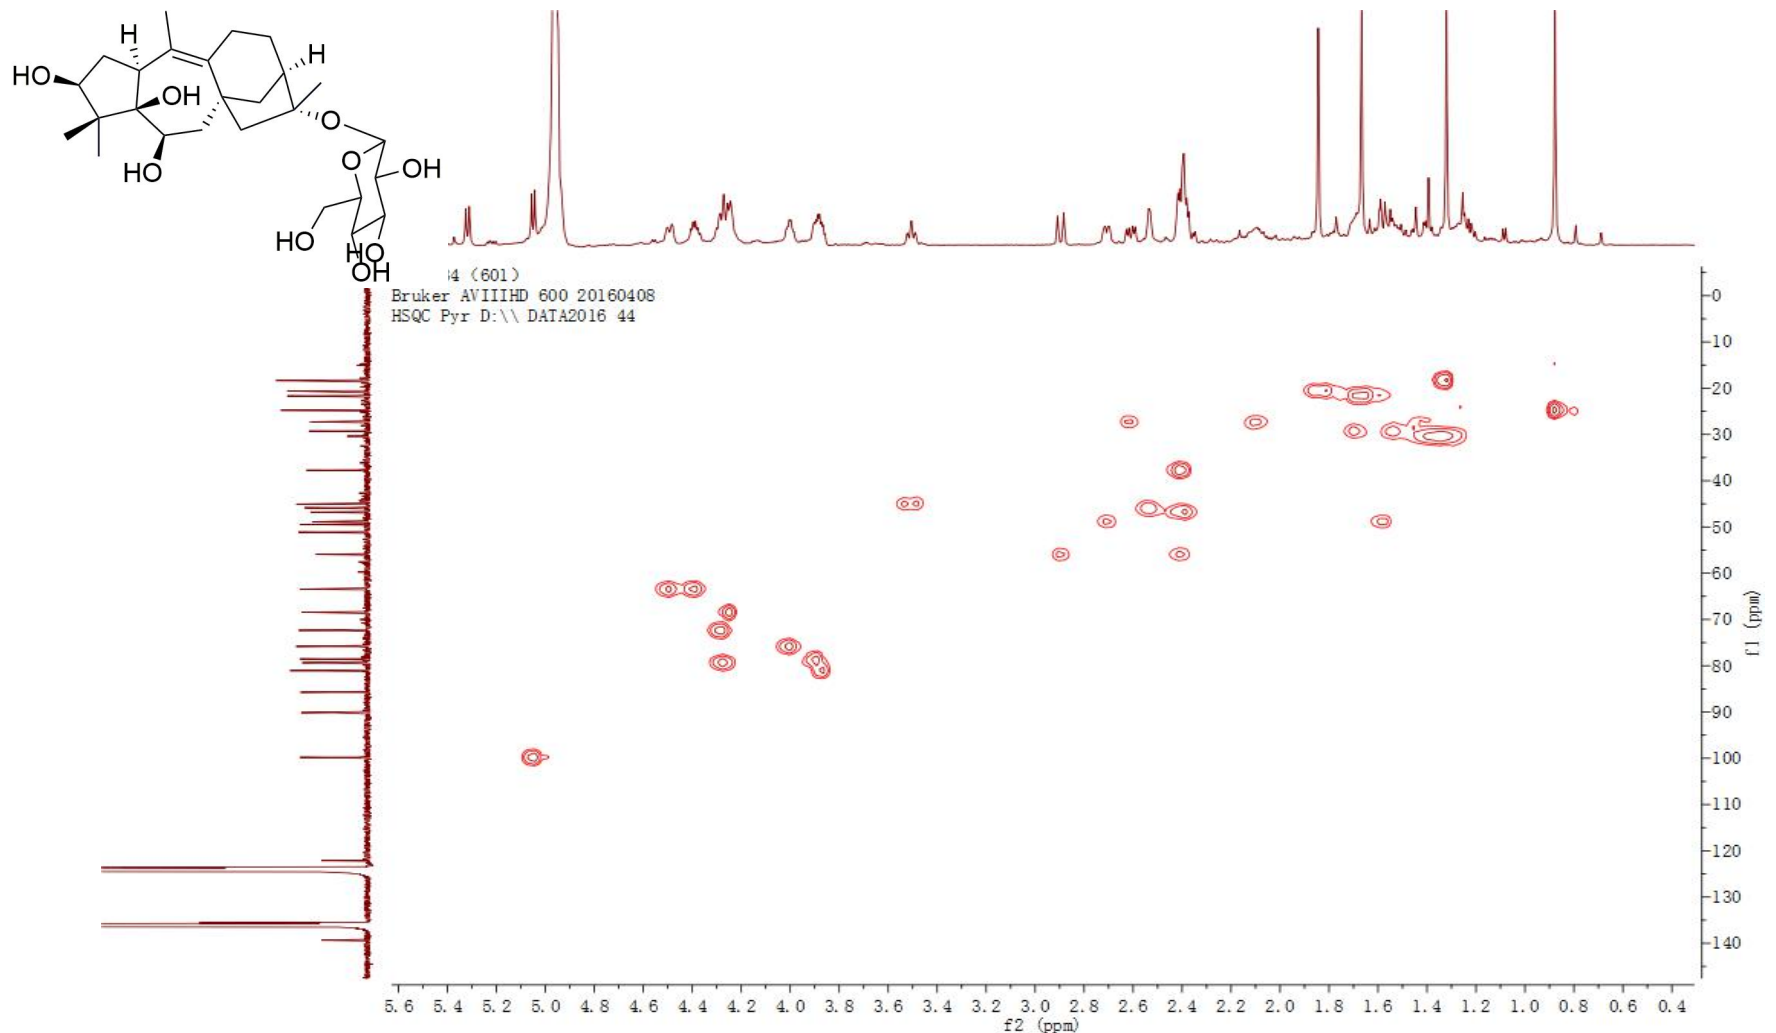

The HSQC spectrum of **5** in C<sub>5</sub>D<sub>5</sub>N (<sup>1</sup>H: 600 MHz, <sup>13</sup>C: 150 MHz)

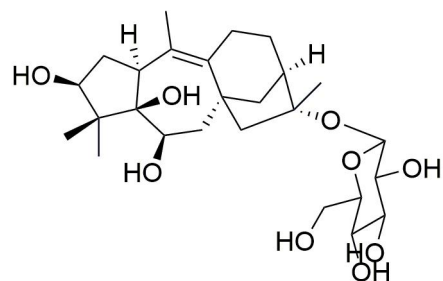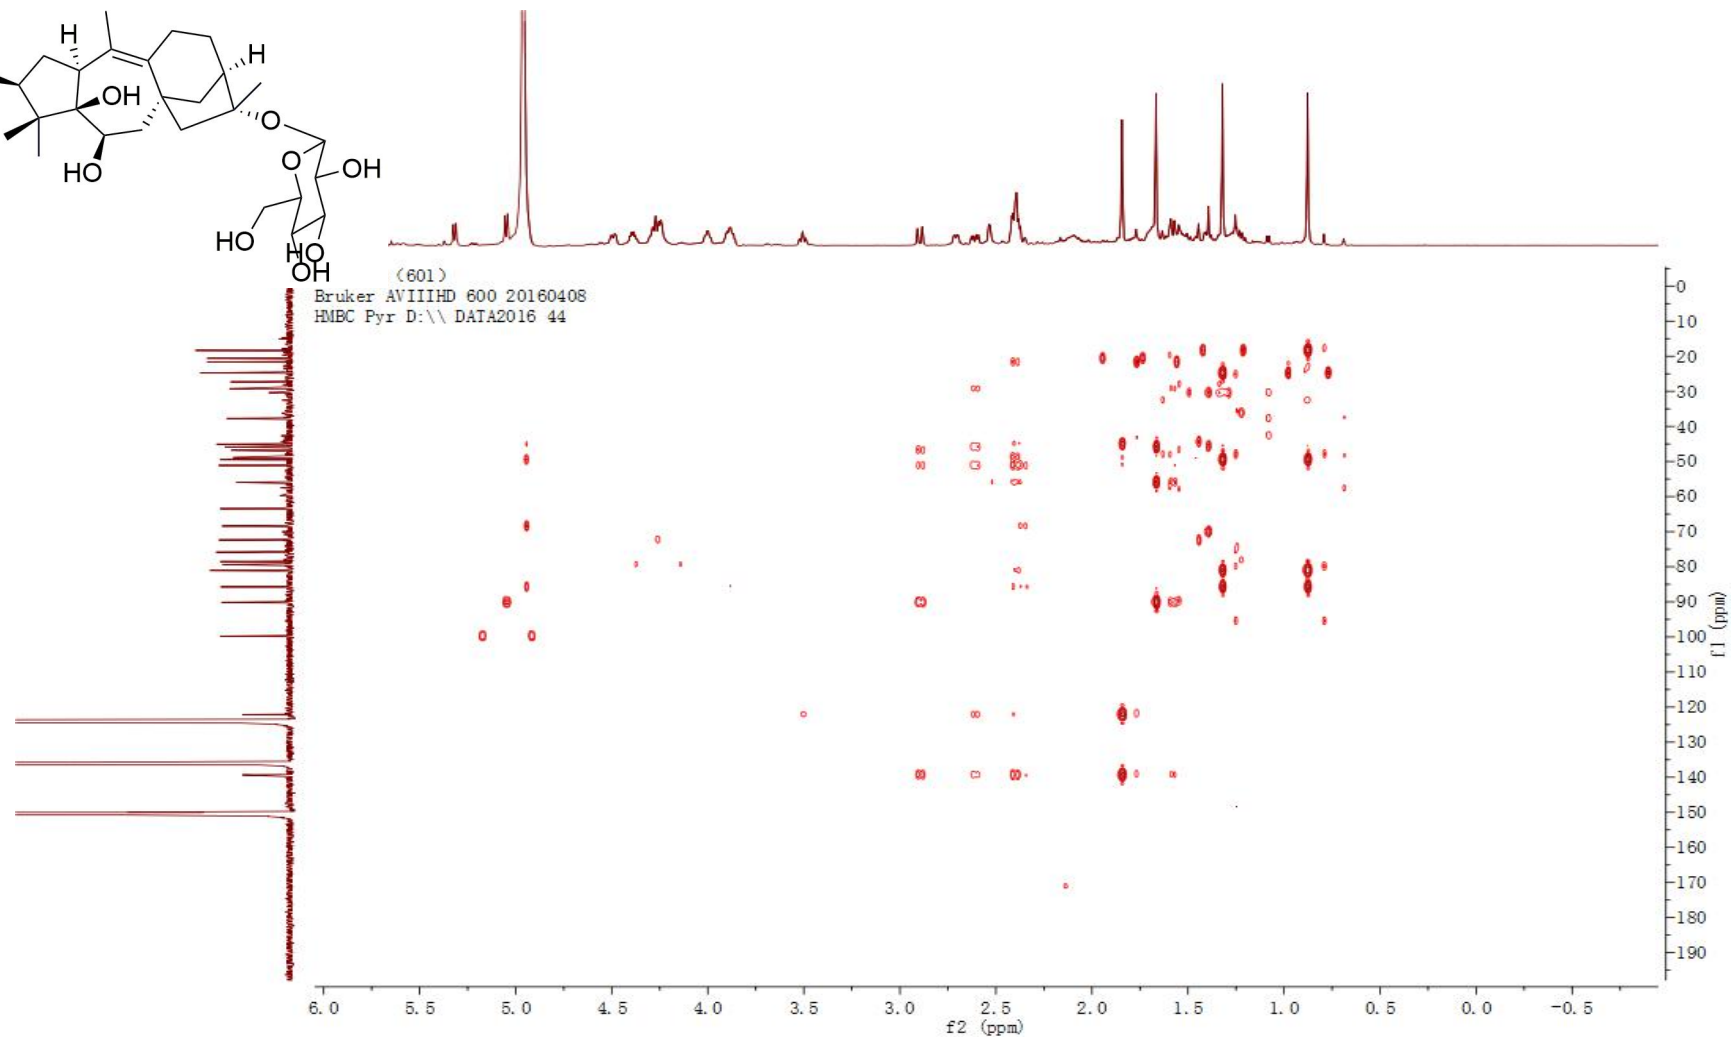

The HMBC spectrum of **5** in C<sub>5</sub>D<sub>5</sub>N (<sup>1</sup>H: 600 MHz, <sup>13</sup>C: 150 MHz)

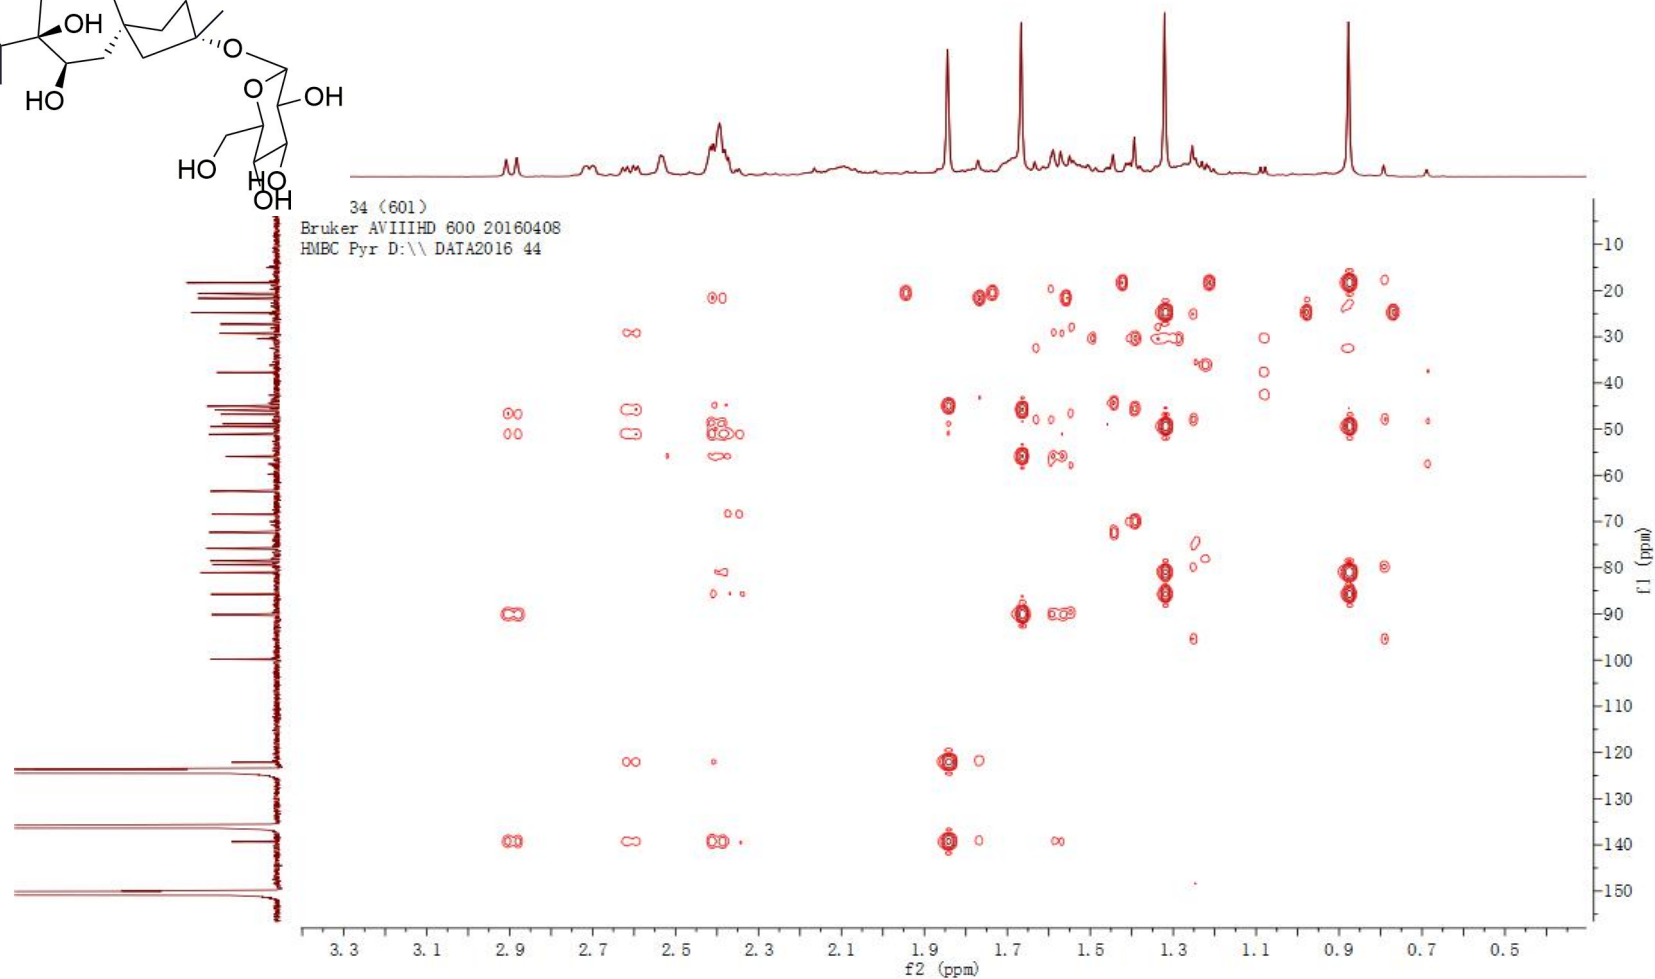

The HMBC spectrum (amplified) of **5** in  $\text{C}_5\text{D}_5\text{N}$  ( $^1\text{H}$ : 600 MHz,  $^{13}\text{C}$ : 150 MHz)

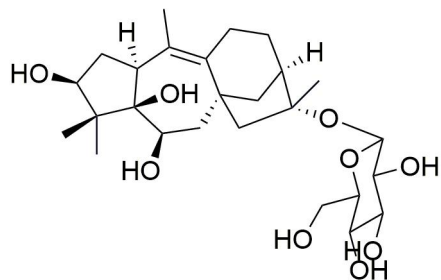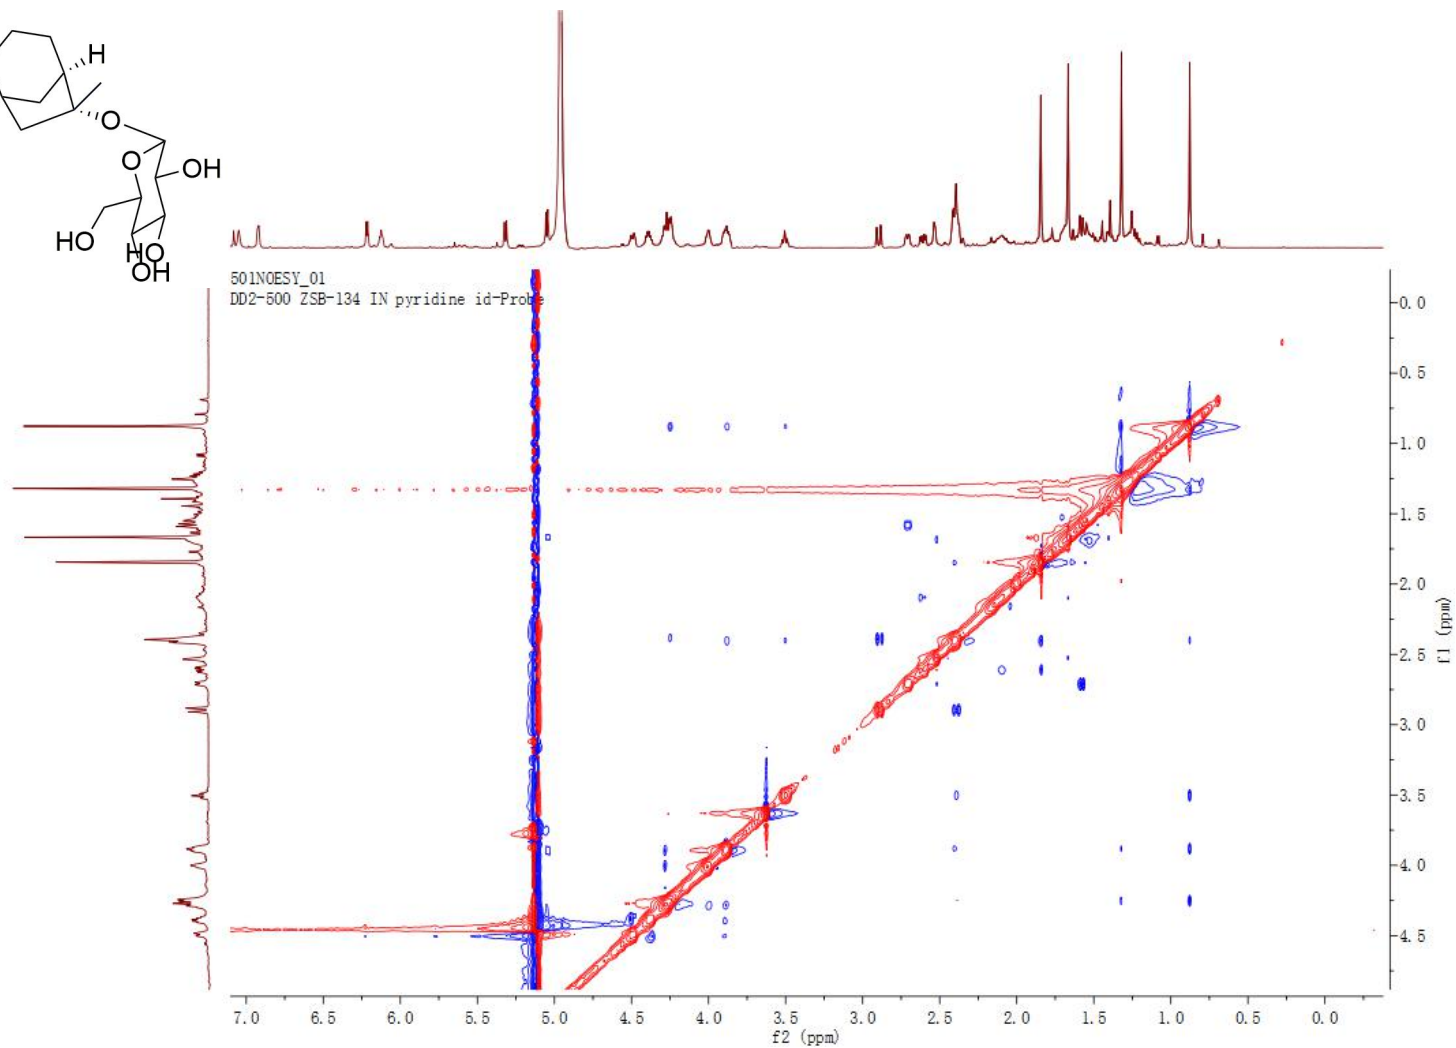

The NOESY spectrum of **5** in  $C_5D_5N$  (600 MHz)

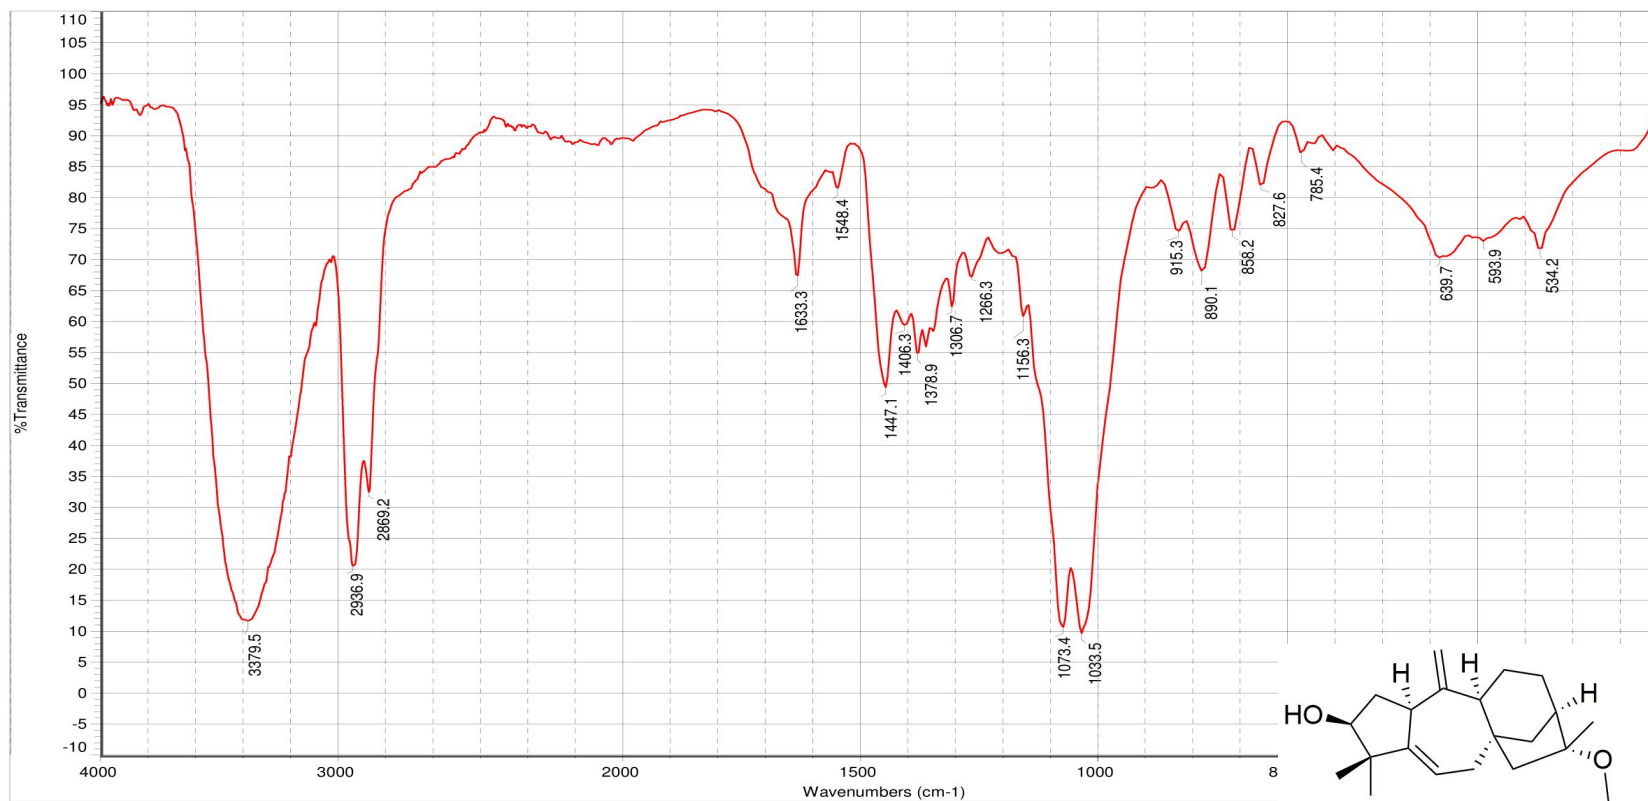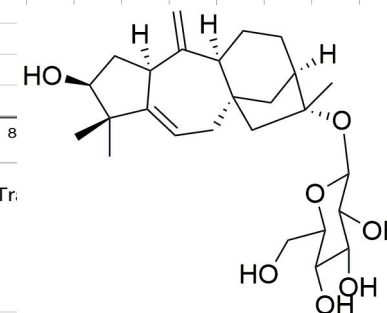

日期: 星期一 1月 16 10:43:09 2017 (GMT+08:00) Sample Name : ZSB - 189 (显微镜透射法 FT- IR Microscope Tr

扫描次数: 100

傅立叶变换显微镜红外(FT-IR Microscope): Centaurus

分辨率: 8.000

美国热电公司(Thermo)傅立叶变换红外光谱仪:Nicolet 5700

The IR spectrum of 6



MS Formula Results: + Scan (6.973 min) Sub (2016052604.d)

| m/z      | Ion                 | Formula                                          | Abundance |
|----------|---------------------|--------------------------------------------------|-----------|
| 487.2676 | (M+Na) <sup>+</sup> | C <sub>26</sub> H <sub>40</sub> NaO <sub>7</sub> | 360201.6  |

  

| Best                                | Formula (M)                                                   | Ion Formula                                                     | Score | Cross Sco | Mass     | Calc Mass | Calc m/z | Diff (ppm) | Abs Diff (ppm) | Mass Match | Abund Match | Spacing Match | DBE |
|-------------------------------------|---------------------------------------------------------------|-----------------------------------------------------------------|-------|-----------|----------|-----------|----------|------------|----------------|------------|-------------|---------------|-----|
| <input checked="" type="checkbox"/> | C <sub>26</sub> H <sub>40</sub> O <sub>7</sub>                | C <sub>26</sub> H <sub>40</sub> NaO <sub>7</sub>                | 99.81 |           | 464.2783 | 464.2774  | 487.2666 | -1.95      | 1.95           | 99.88      | 99.86       | 99.63         | 7   |
| <input type="checkbox"/>            | C <sub>23</sub> H <sub>44</sub> O <sub>7</sub> S              | C <sub>23</sub> H <sub>44</sub> NaO <sub>7</sub> S              | 98.86 |           | 464.2783 | 464.2808  | 487.27   | 5.3        | 5.3            | 99.13      | 97.69       | 99.7          | 2   |
| <input type="checkbox"/>            | C <sub>27</sub> H <sub>44</sub> O <sub>2</sub> S <sub>2</sub> | C <sub>27</sub> H <sub>44</sub> NaO <sub>2</sub> S <sub>2</sub> | 97.75 |           | 464.2783 | 464.2783  | 487.2675 | -0.09      | 0.09           | 100        | 92.46       | 99.6          | 6   |

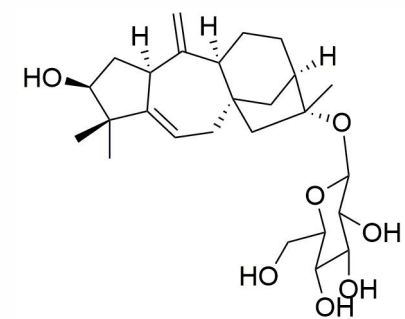

page 1

The HRESIMS spectrum of **6**

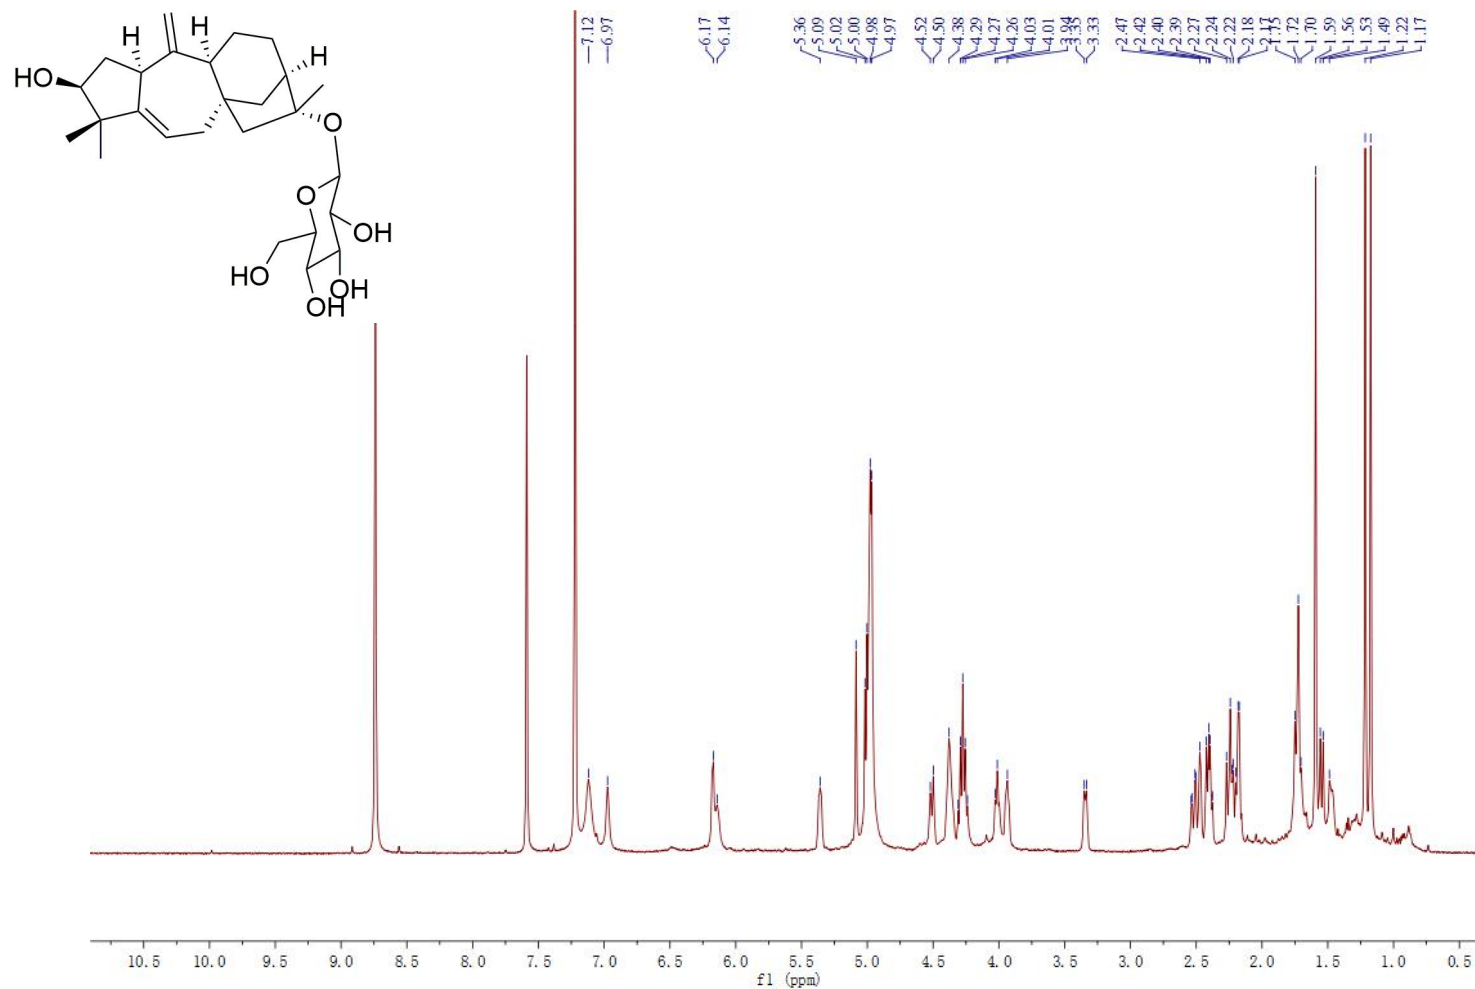

The  $^1\text{H}$  NMR spectrum of **6** in  $\text{C}_5\text{D}_5\text{N}$  (500 MHz)

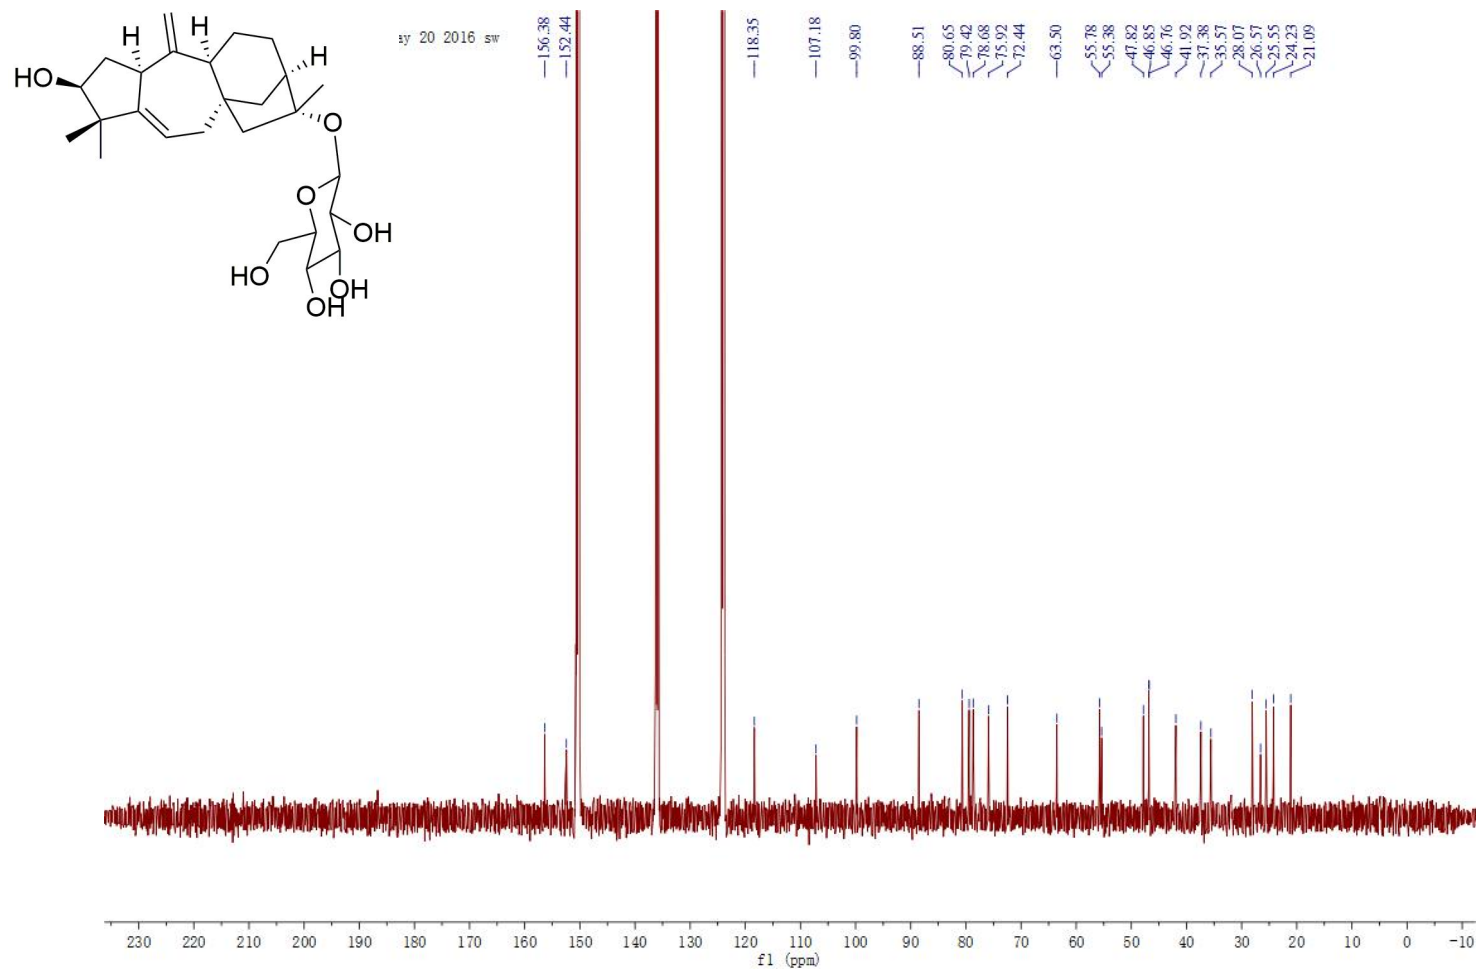

The  $^{13}\text{C}$  NMR spectrum of **6** in  $\text{C}_5\text{D}_5\text{N}$  (125 MHz)

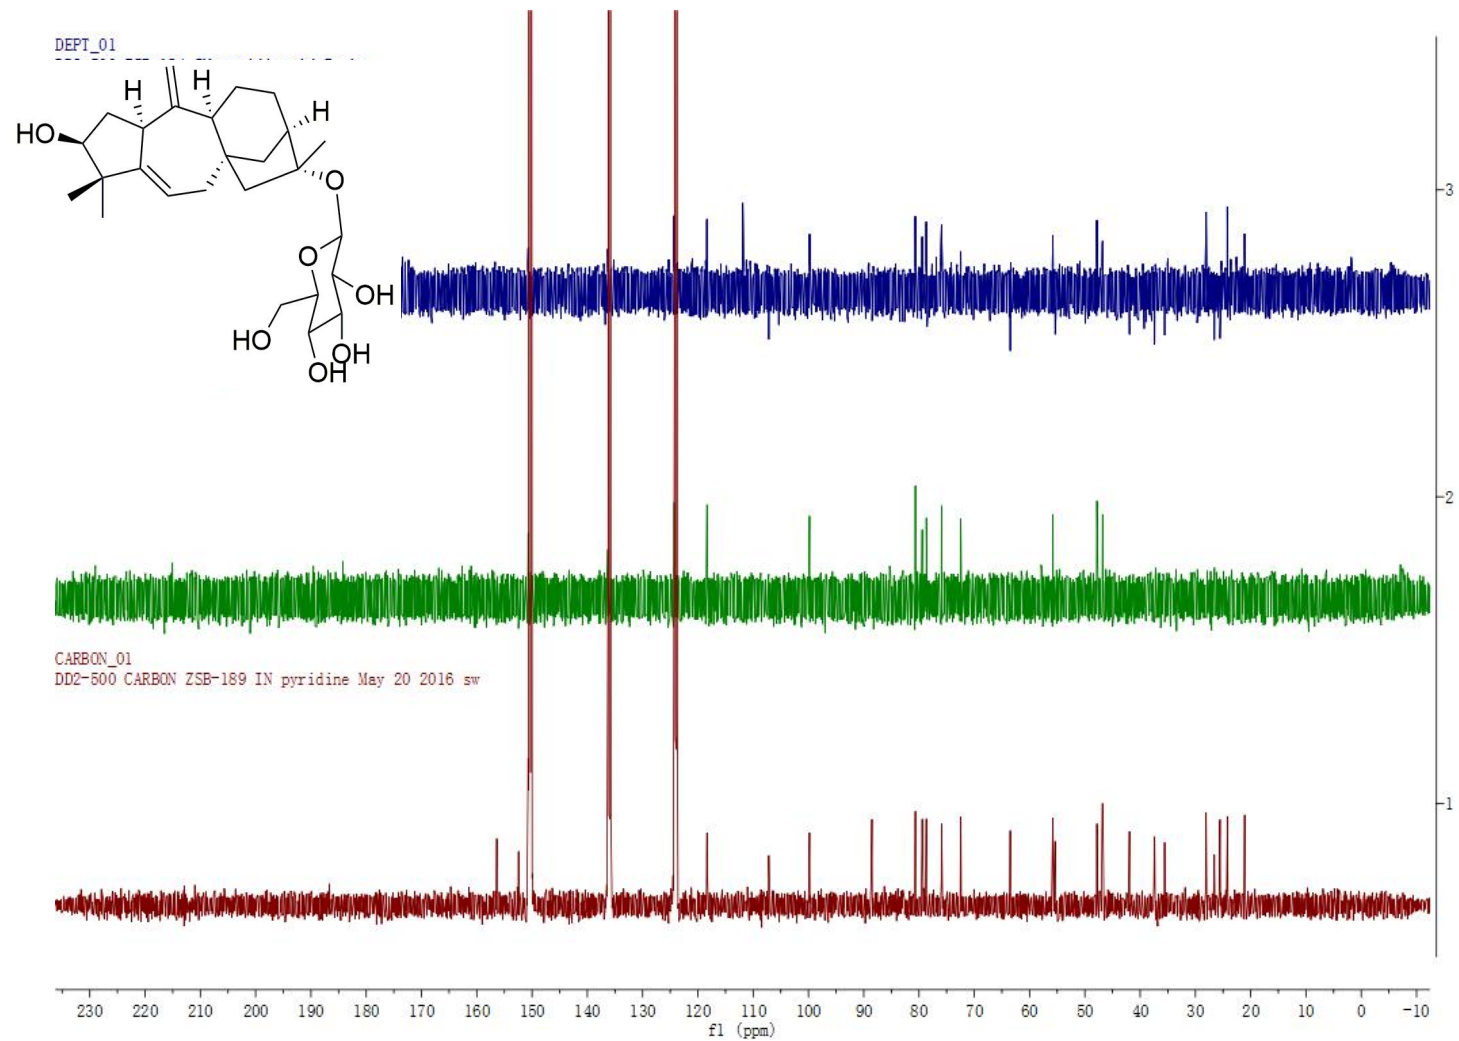

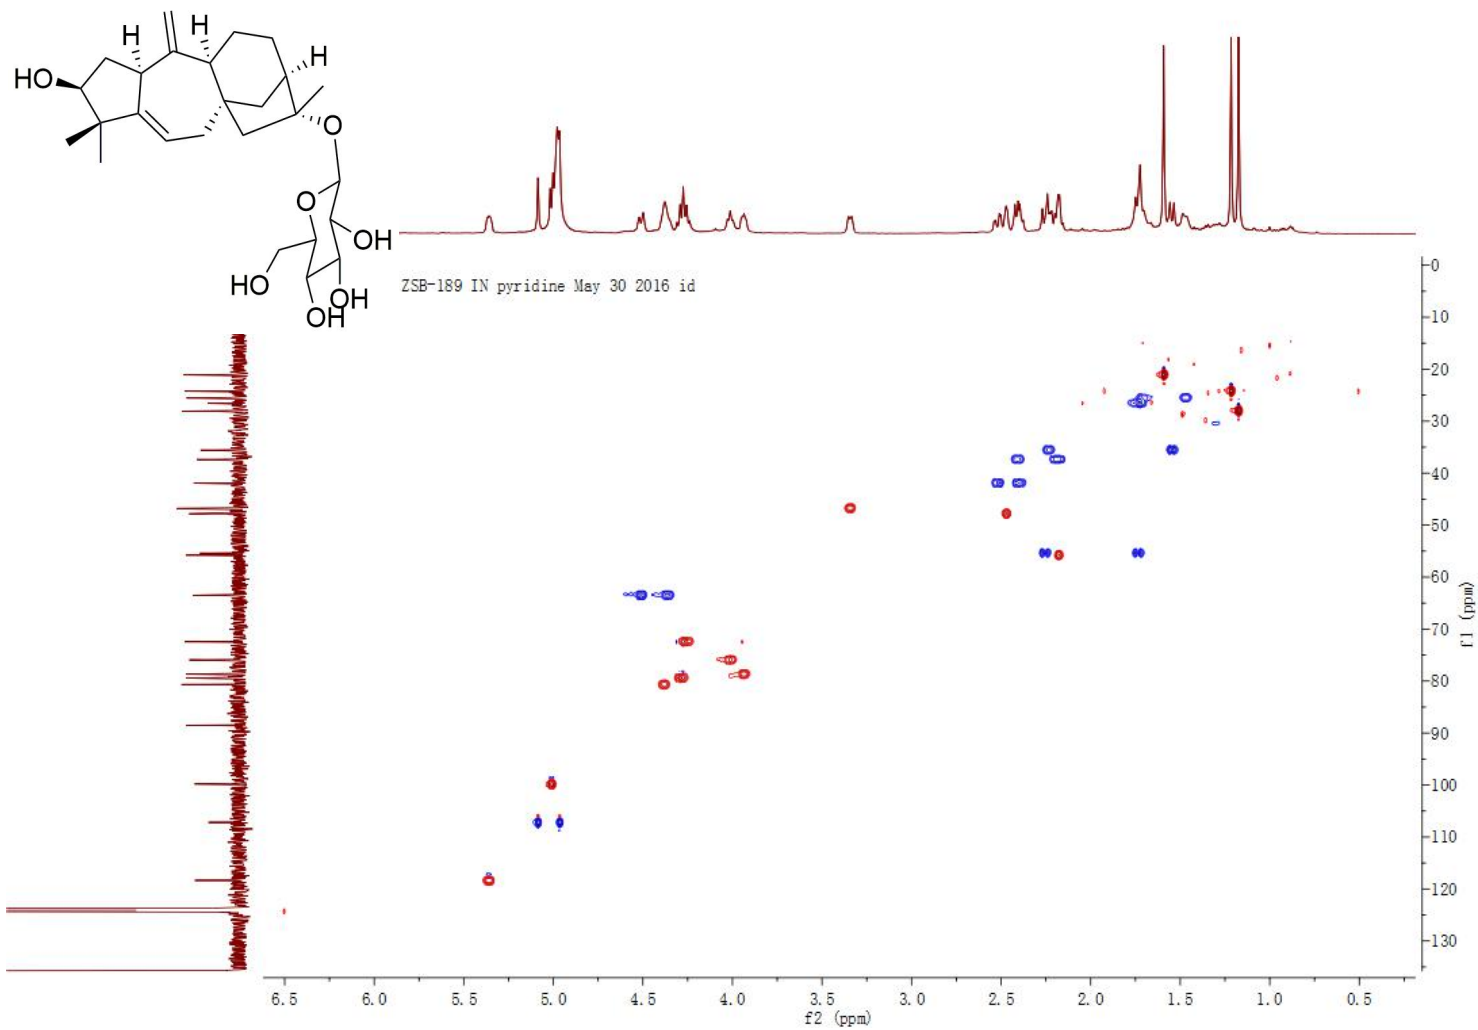

The HSQC spectrum of **6** in  $C_5D_5N$  ( $^1H$ : 500 MHz,  $^{13}C$ : 125 MHz)

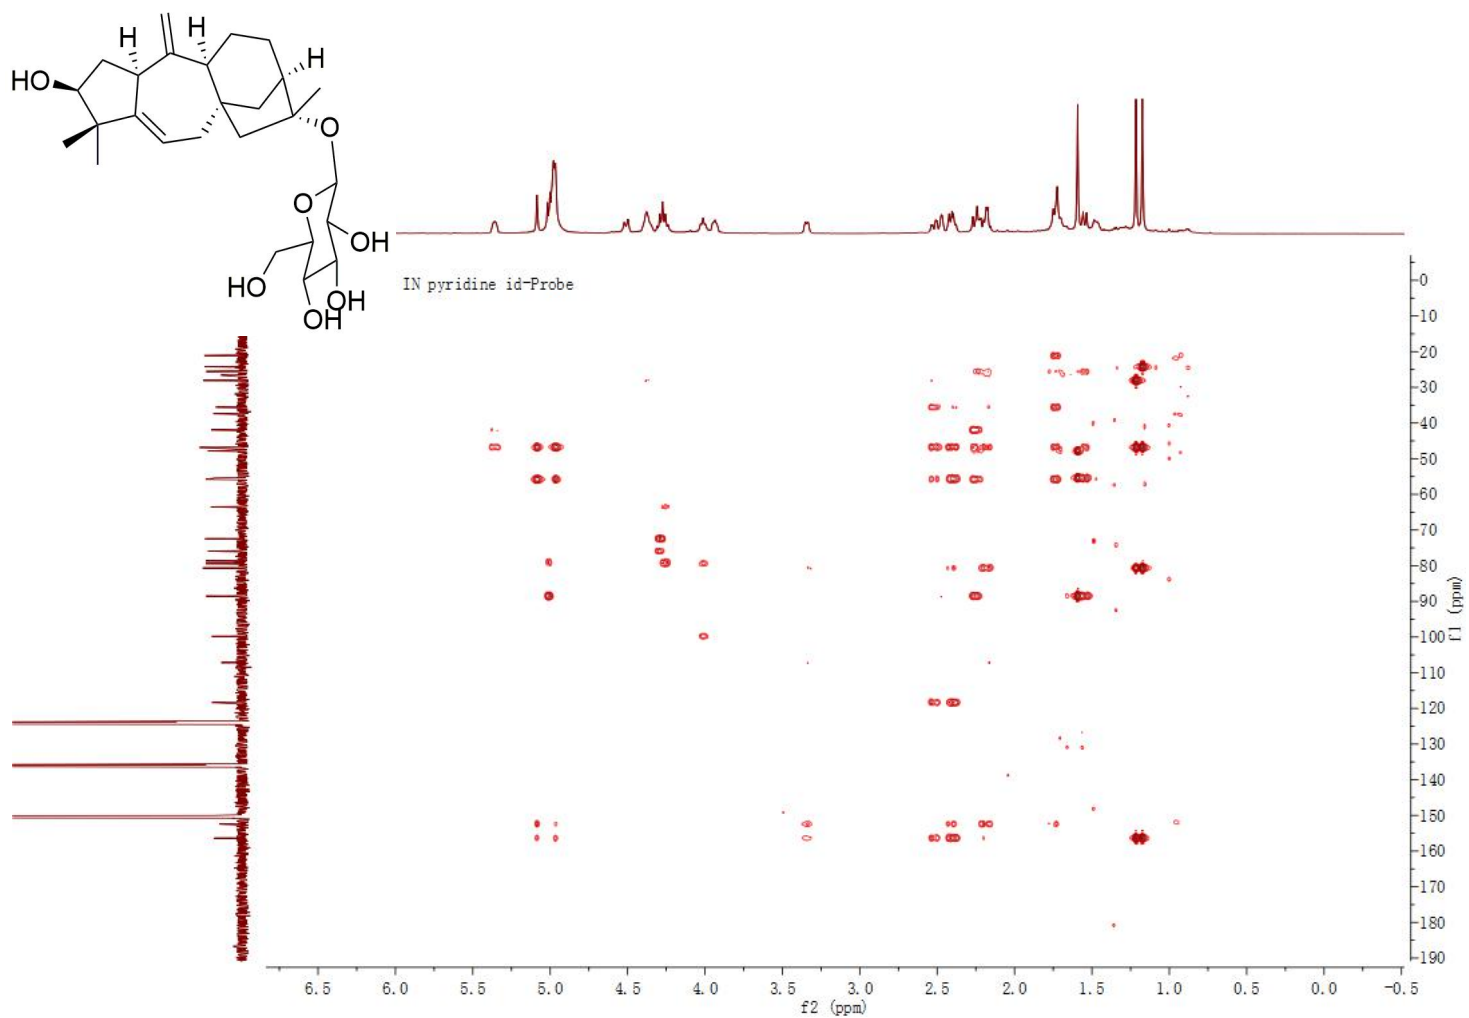

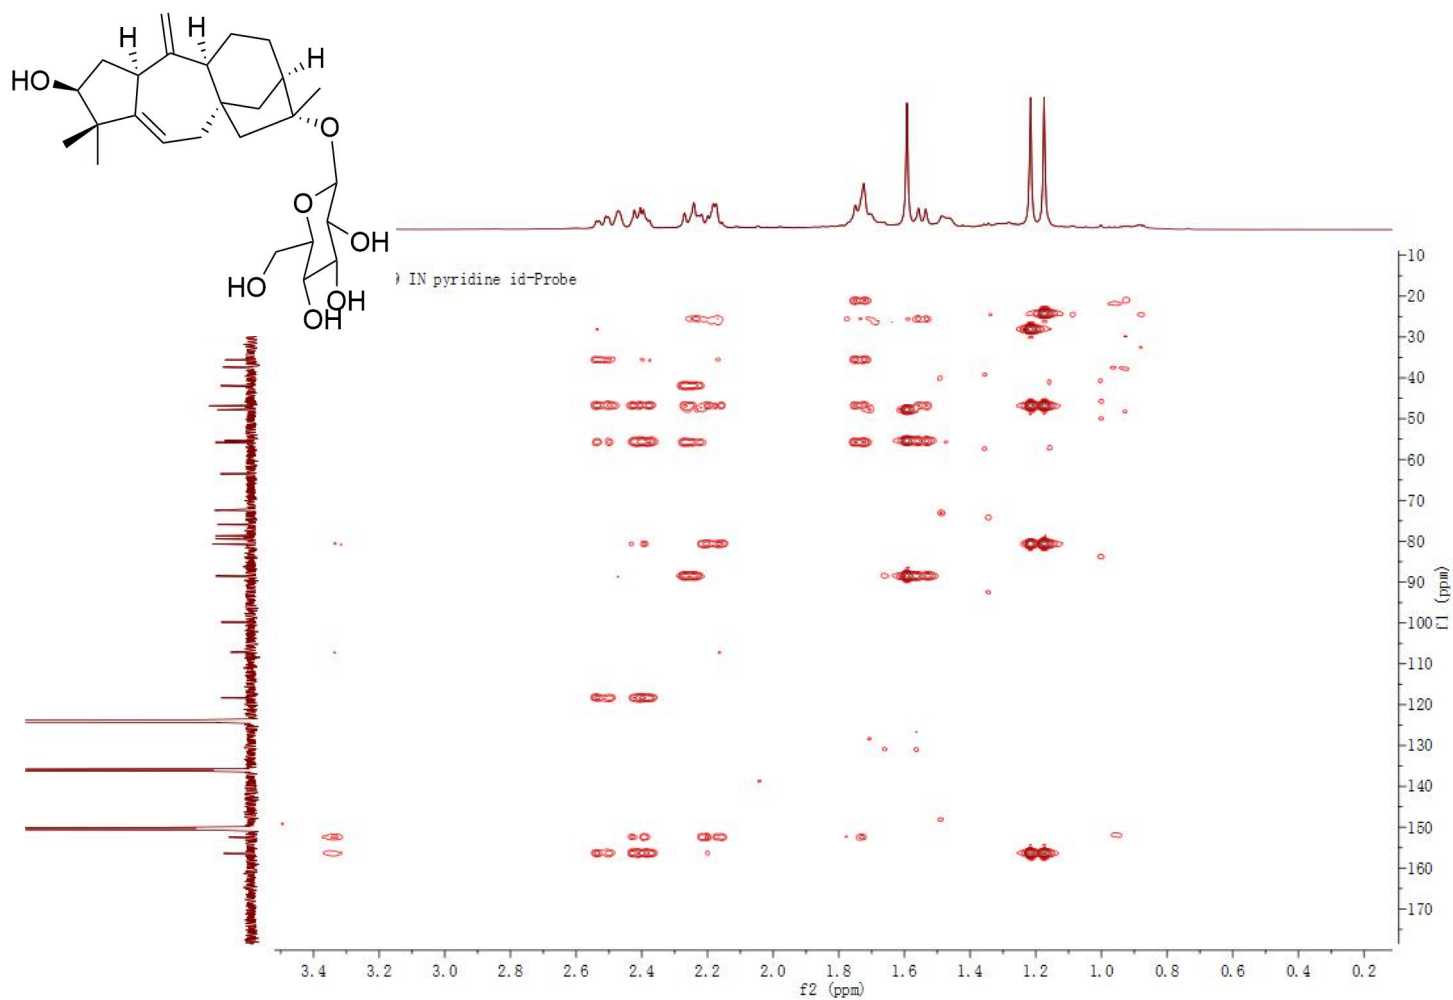

The HMBC spectrum (amplified) of **6** in  $C_5D_5N$  ( $^1H$ : 500 MHz,  $^{13}C$ : 125 MHz)

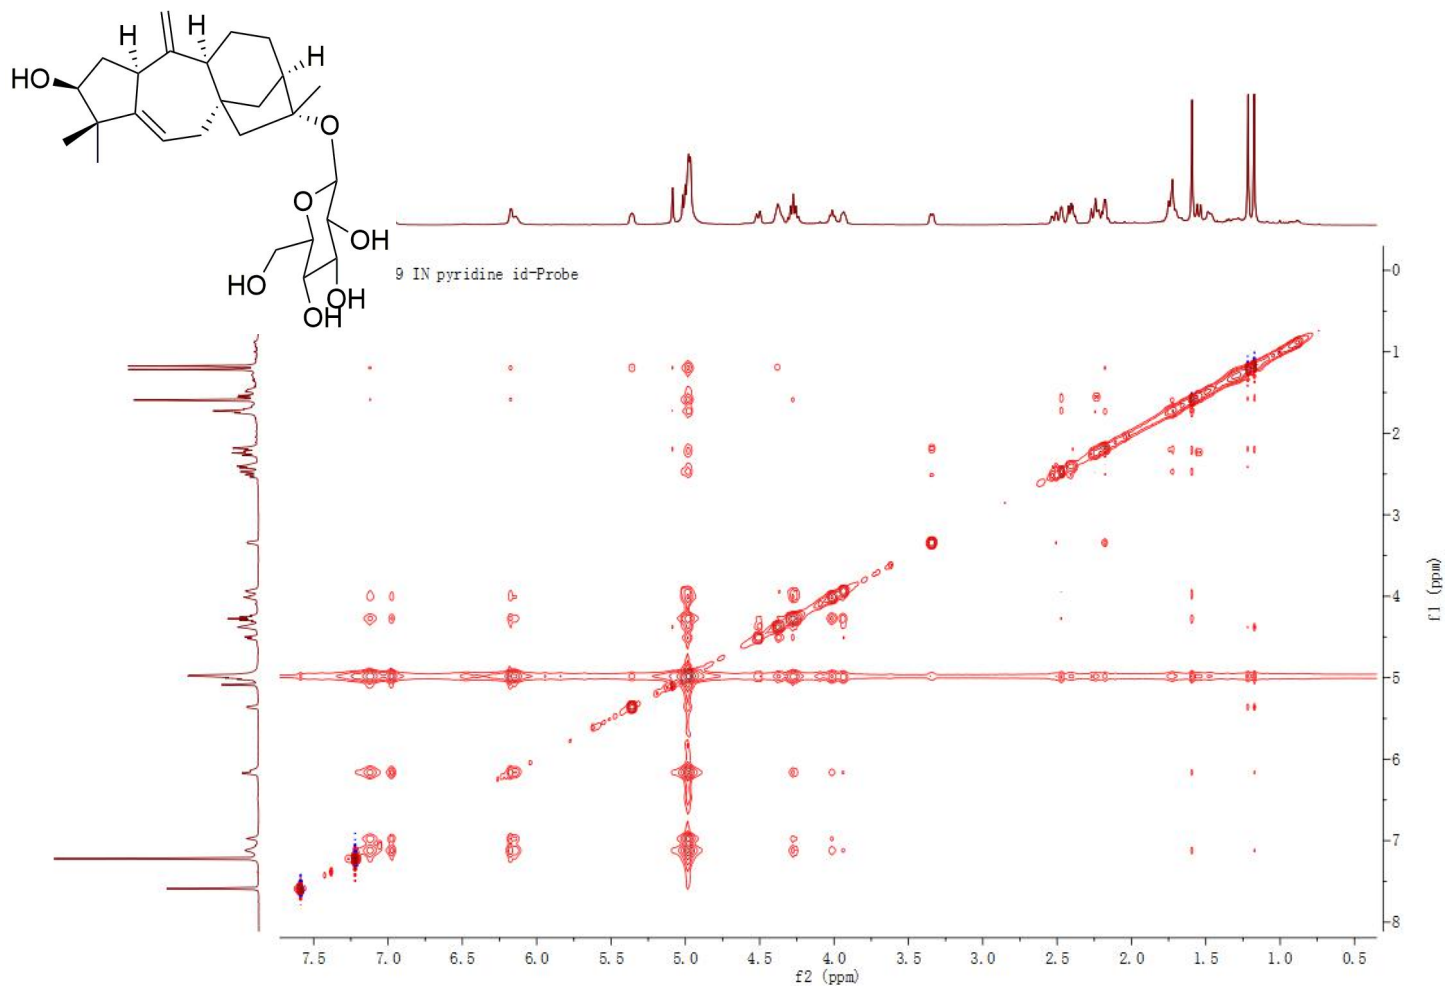

The NOESY spectrum of **6** in C<sub>5</sub>D<sub>5</sub>N (500 MHz)



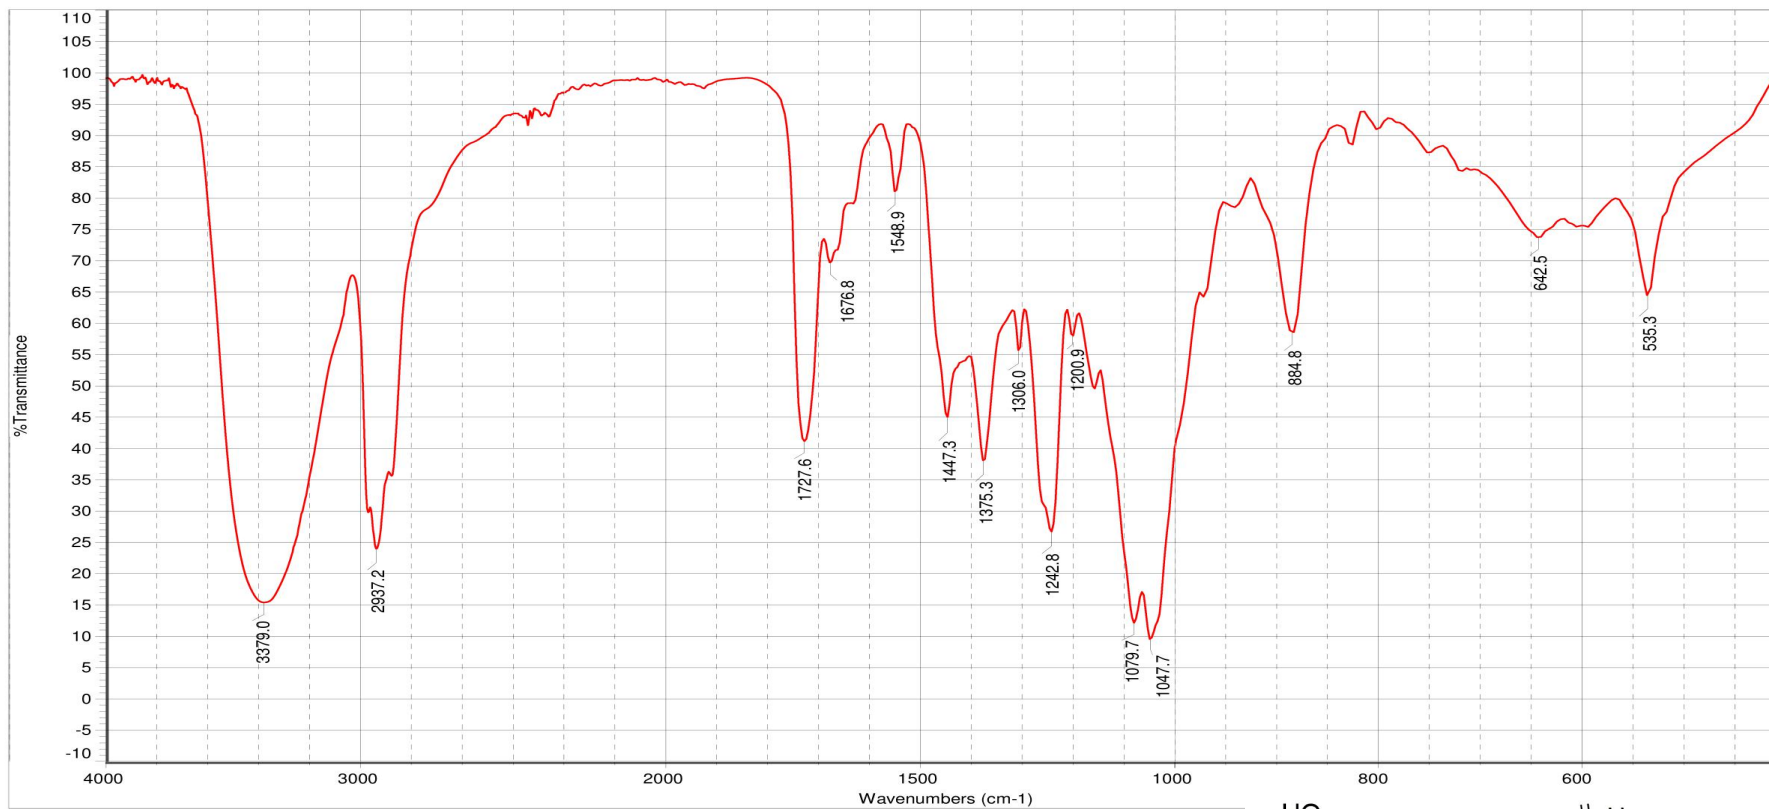

日期: 星期四 11月 03 09:17:11 2016 (GMT+08:00) Sample Name : ZSB - 191

( 显微镜透射法 FT- IR M

扫描次数: 100

傅里叶变换红外显微镜(FT-IR Microscope): Centaurus

分辨率: 8.000

美国热电公司(Thermo)傅里叶变换红外光谱仪:Nicolet 5700

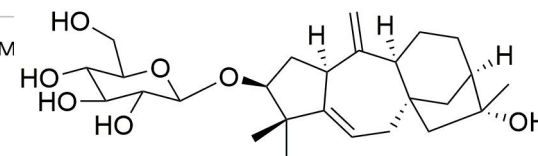

The IR spectrum of 7

MS Formula Results: + Scan (6.927 min) Sub (2016052607.d)

| m/z      | Ion                 | Formula                                          | Abundance |
|----------|---------------------|--------------------------------------------------|-----------|
| 487.2671 | (M+Na) <sup>+</sup> | C <sub>26</sub> H <sub>40</sub> NaO <sub>7</sub> | 406239.9  |

  

| Best | Formula (M)                                                   | Ion Formula                                                     | Score | Cross Sco | Mass     | Calc Mass | Calc m/z | Diff (ppm) | Abs Diff (ppm) | Mass Match | Abund Match | Spacing Match | DBE |
|------|---------------------------------------------------------------|-----------------------------------------------------------------|-------|-----------|----------|-----------|----------|------------|----------------|------------|-------------|---------------|-----|
| ✓    | C <sub>26</sub> H <sub>40</sub> O <sub>7</sub>                | C <sub>26</sub> H <sub>40</sub> NaO <sub>7</sub>                | 99.84 |           | 464.2779 | 464.2774  | 487.2666 | -1.04      | 1.04           | 99.97      | 99.67       | 99.8          | 7   |
| ☐    | C <sub>27</sub> H <sub>44</sub> O <sub>2</sub> S <sub>2</sub> | C <sub>27</sub> H <sub>44</sub> NaO <sub>2</sub> S <sub>2</sub> | 97.92 |           | 464.2779 | 464.2783  | 487.2675 | 0.82       | 0.82           | 99.98      | 93.16       | 99.49         | 6   |

page 1

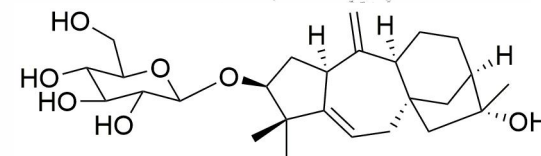

The HRESIMS spectrum of 7

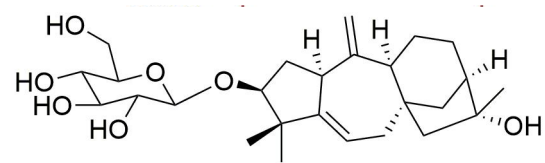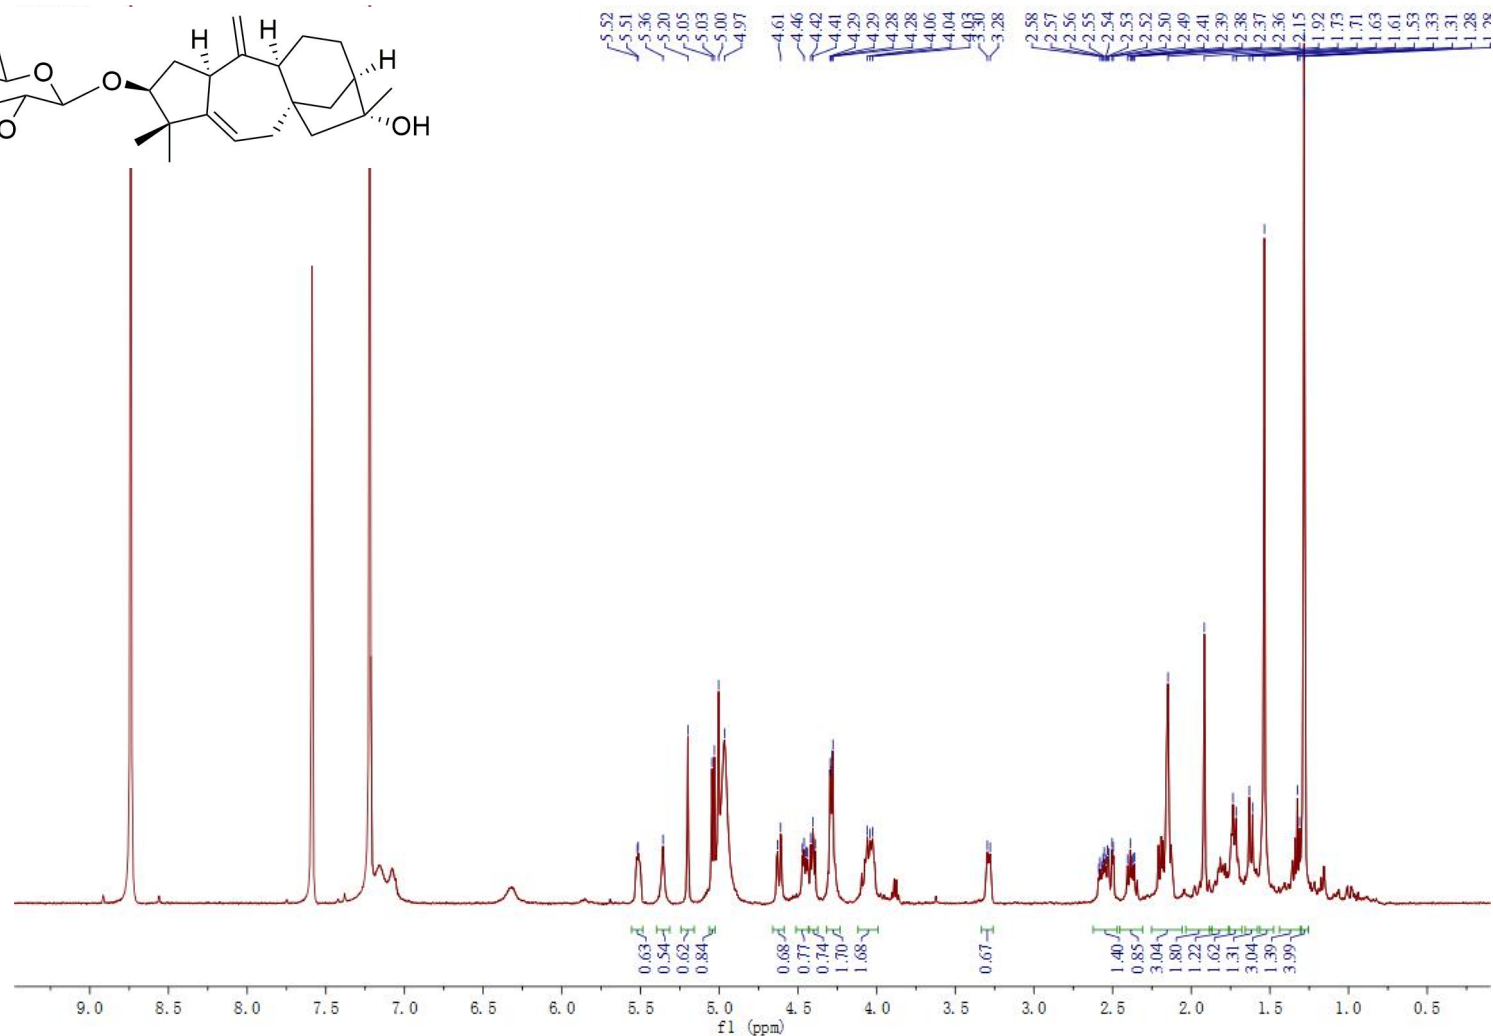

The <sup>1</sup>H NMR spectrum of **7** in C<sub>5</sub>D<sub>5</sub>N (500 MHz)

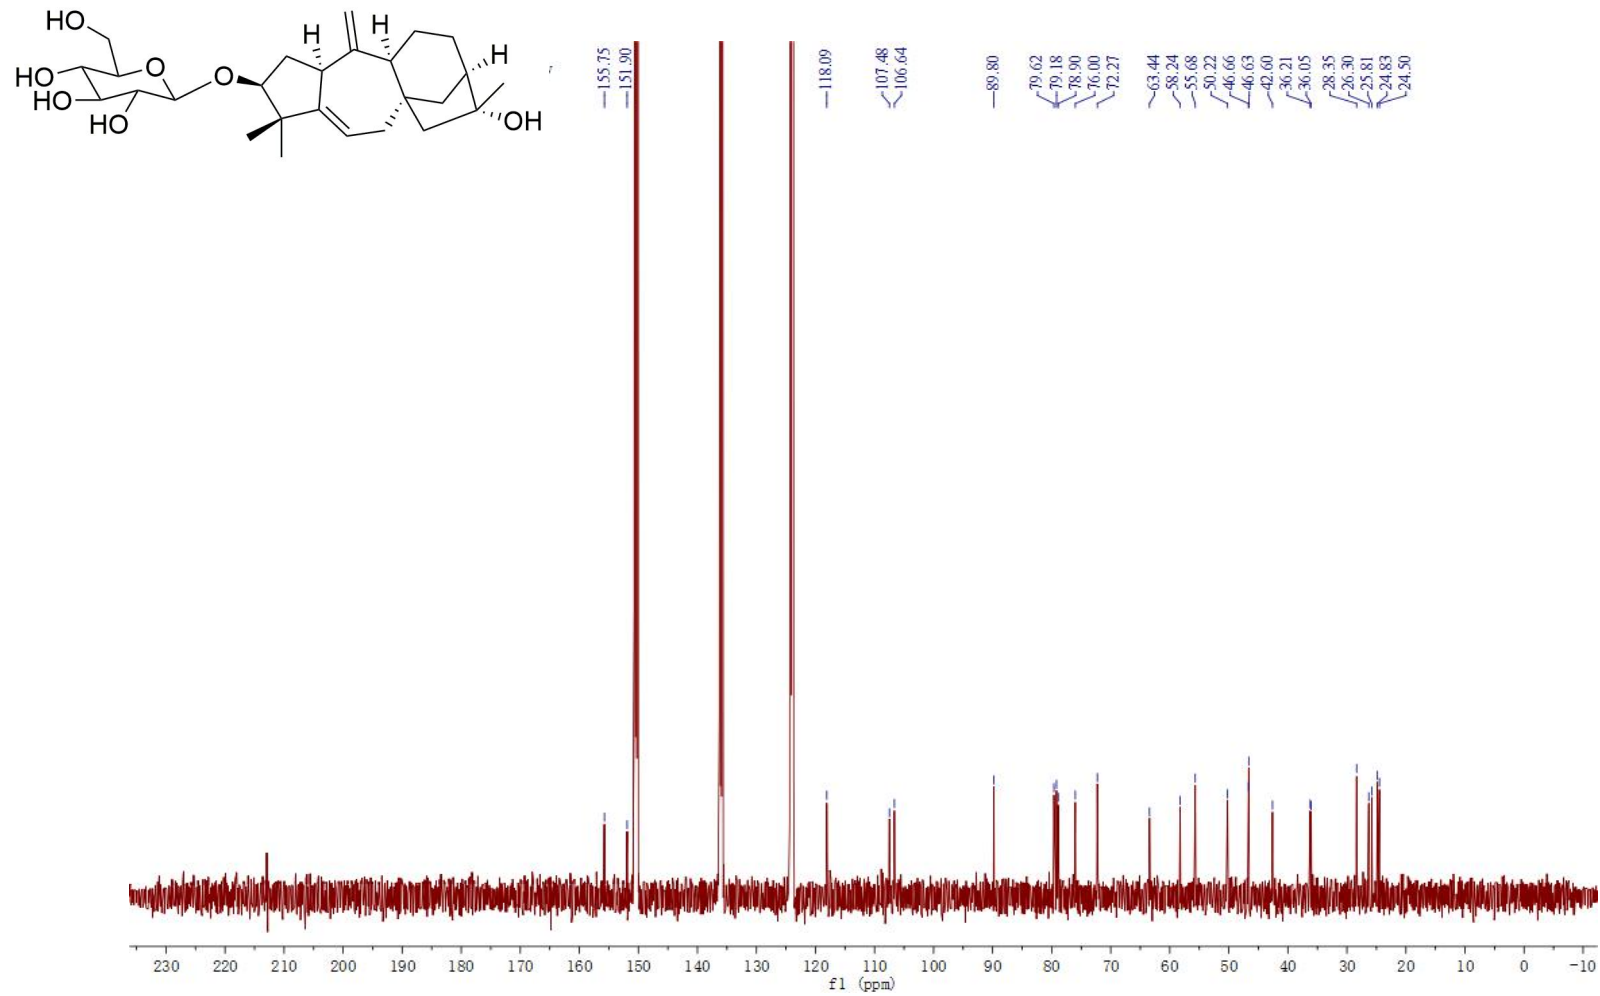

The  $^{13}\text{C}$  NMR spectrum of 7 in  $\text{C}_5\text{D}_5\text{N}$  (125 MHz)

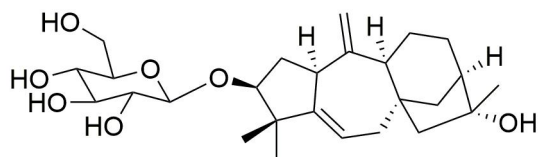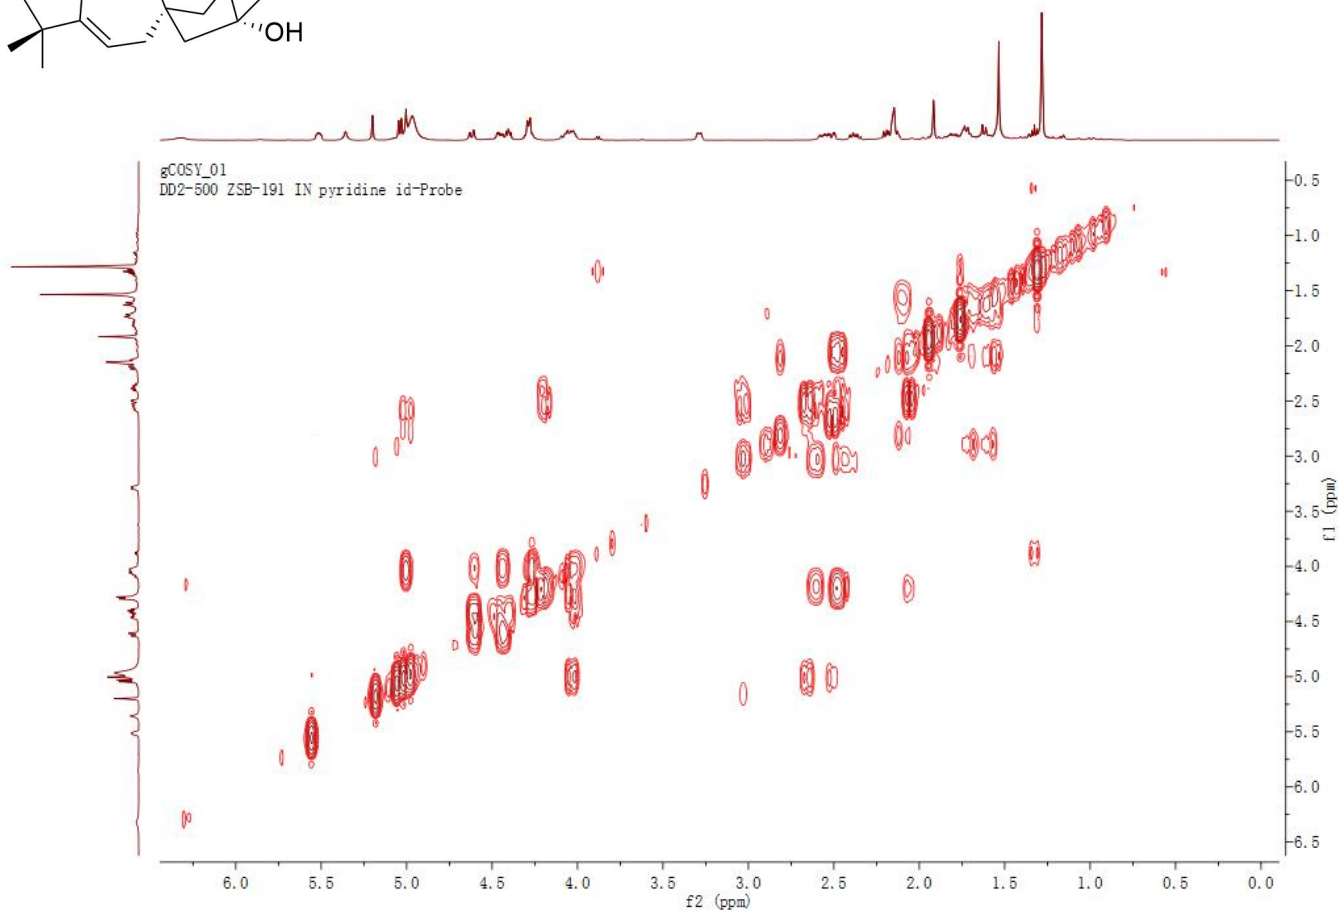

The COSY spectrum of **7** in  $C_5D_5N$  (500 MHz)

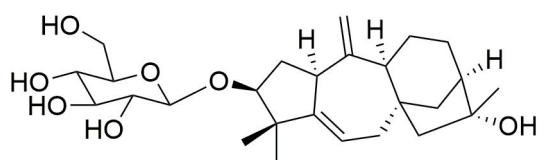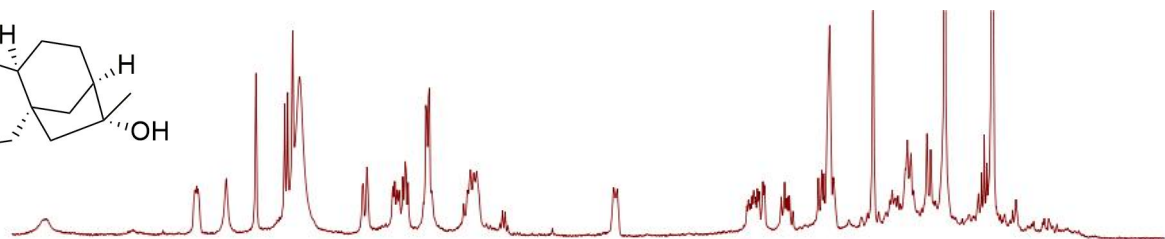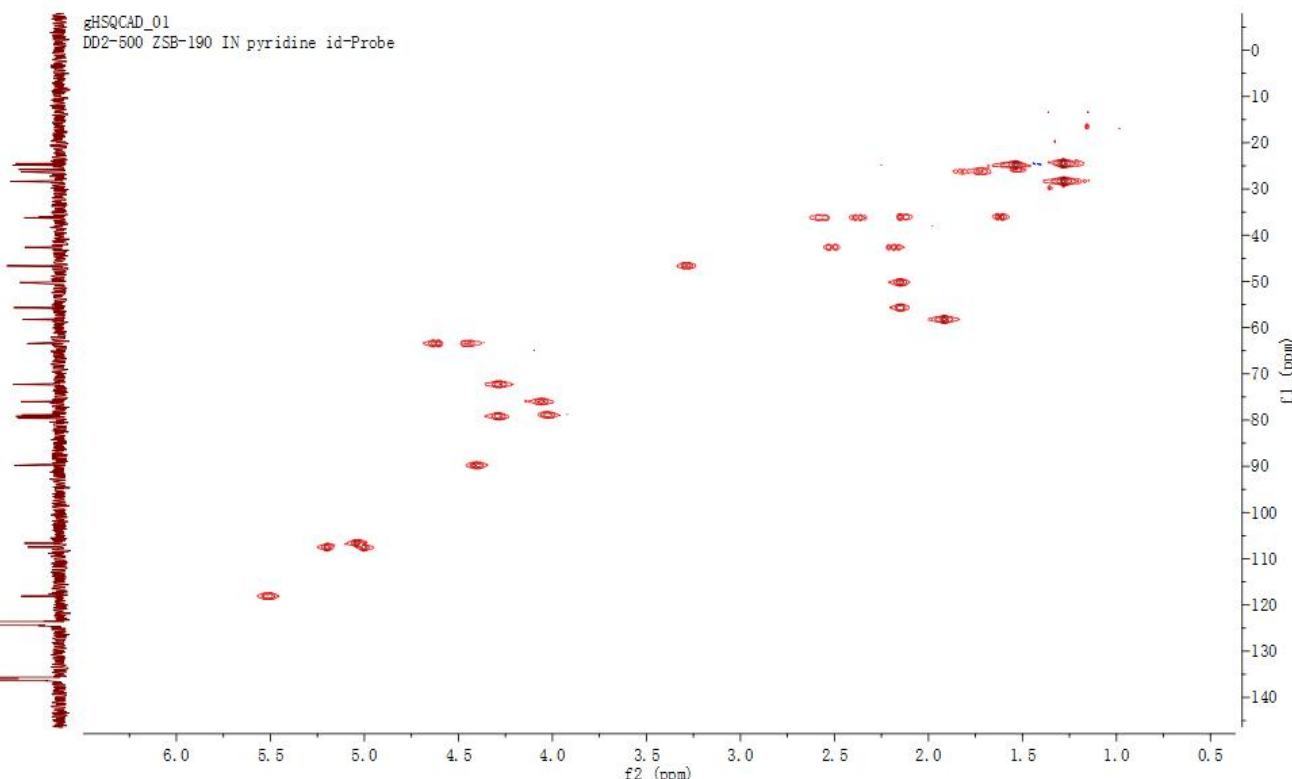

The HSQC spectrum of **7** in C<sub>5</sub>D<sub>5</sub>N (<sup>1</sup>H: 500 MHz, <sup>13</sup>C: 125 MHz)

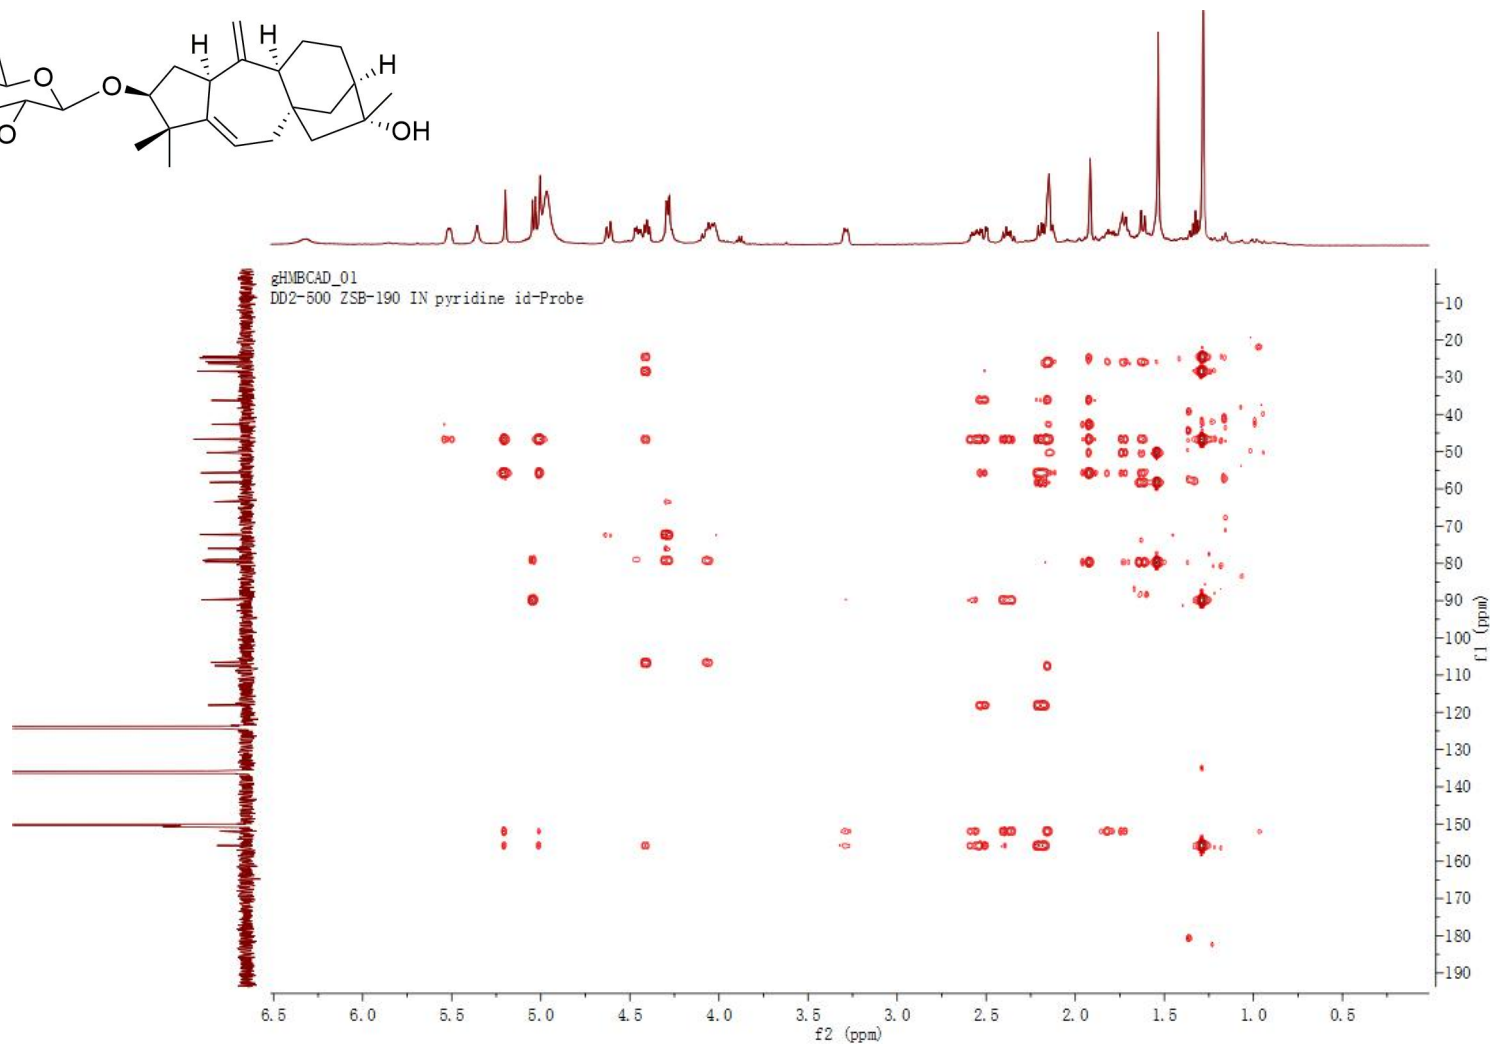

The HMBC spectrum of **7** in C<sub>5</sub>D<sub>5</sub>N (<sup>1</sup>H: 500 MHz, <sup>13</sup>C: 125 MHz)

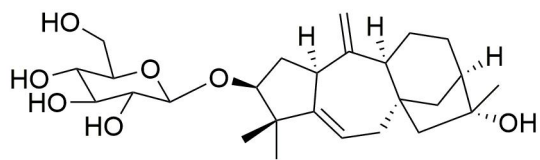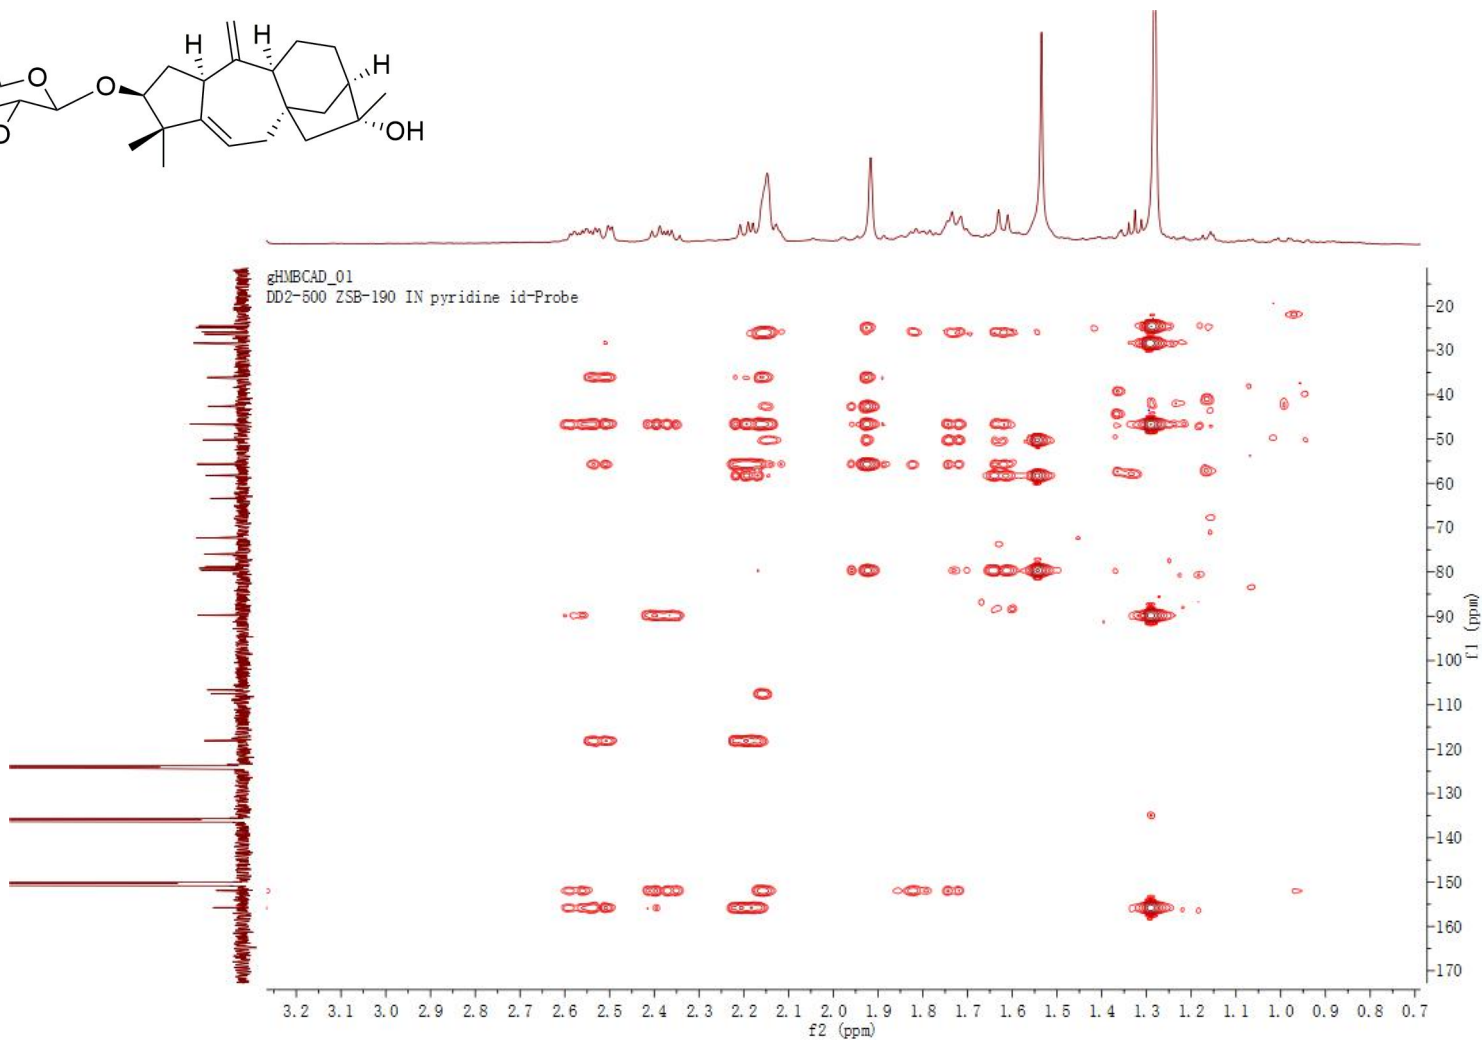

The HMBC spectrum (amplified) of **7** in  $C_5D_5N$  ( $^1H$ : 500 MHz,  $^{13}C$ : 125 MHz)



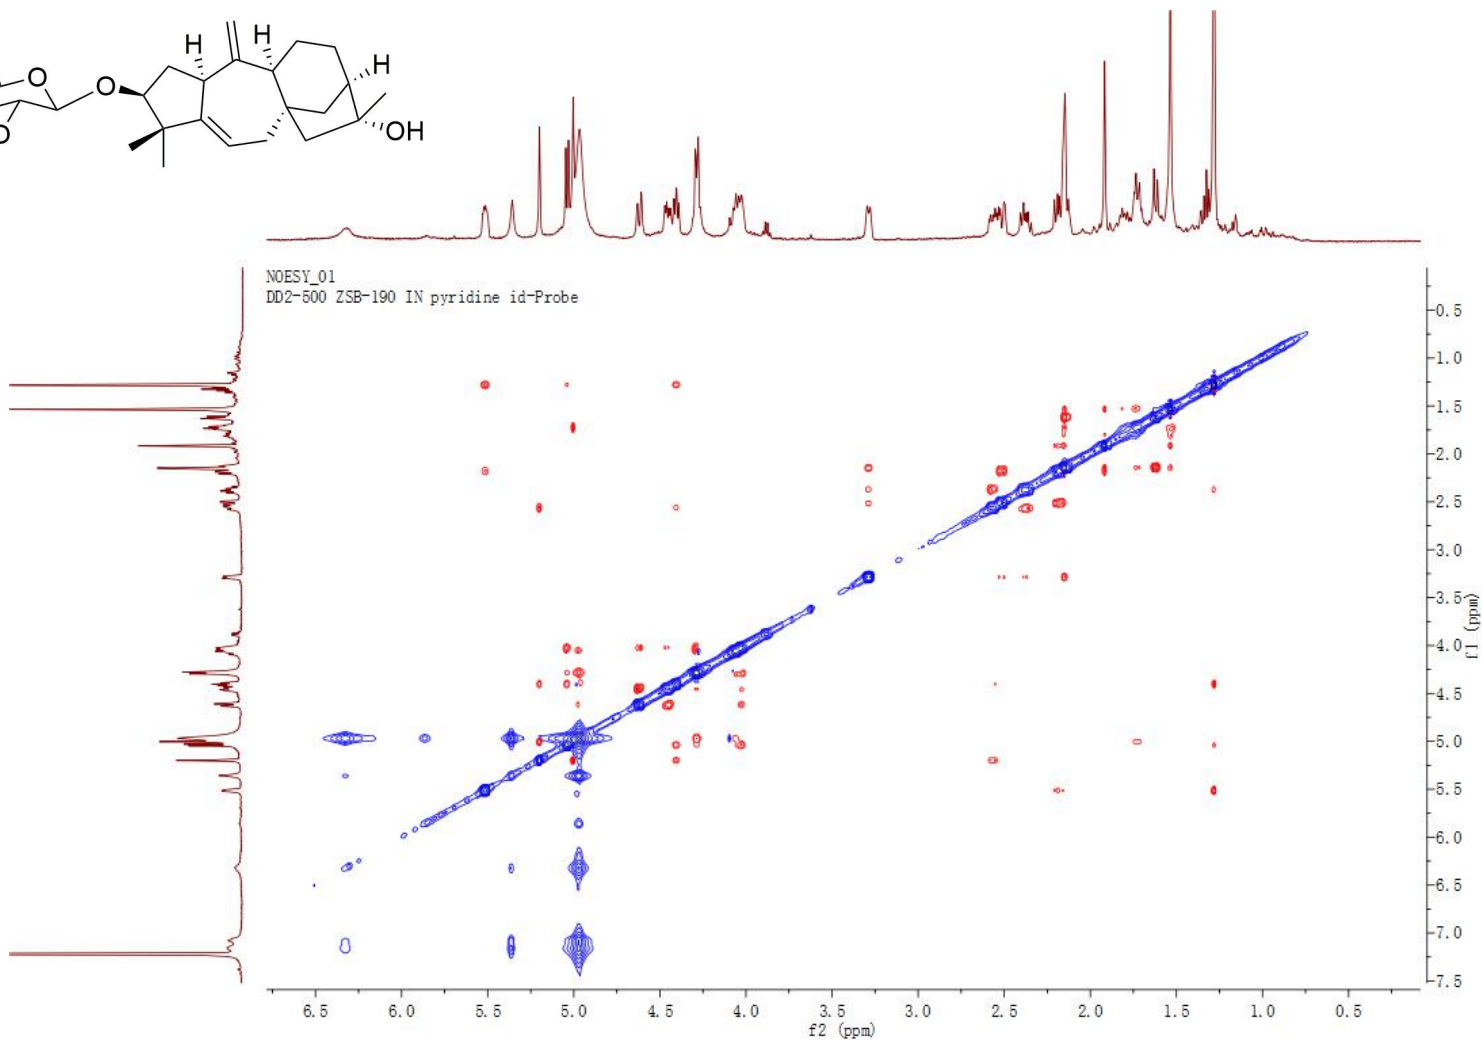

The NOESY spectrum of **7** in C<sub>5</sub>D<sub>5</sub>N (500 MHz)

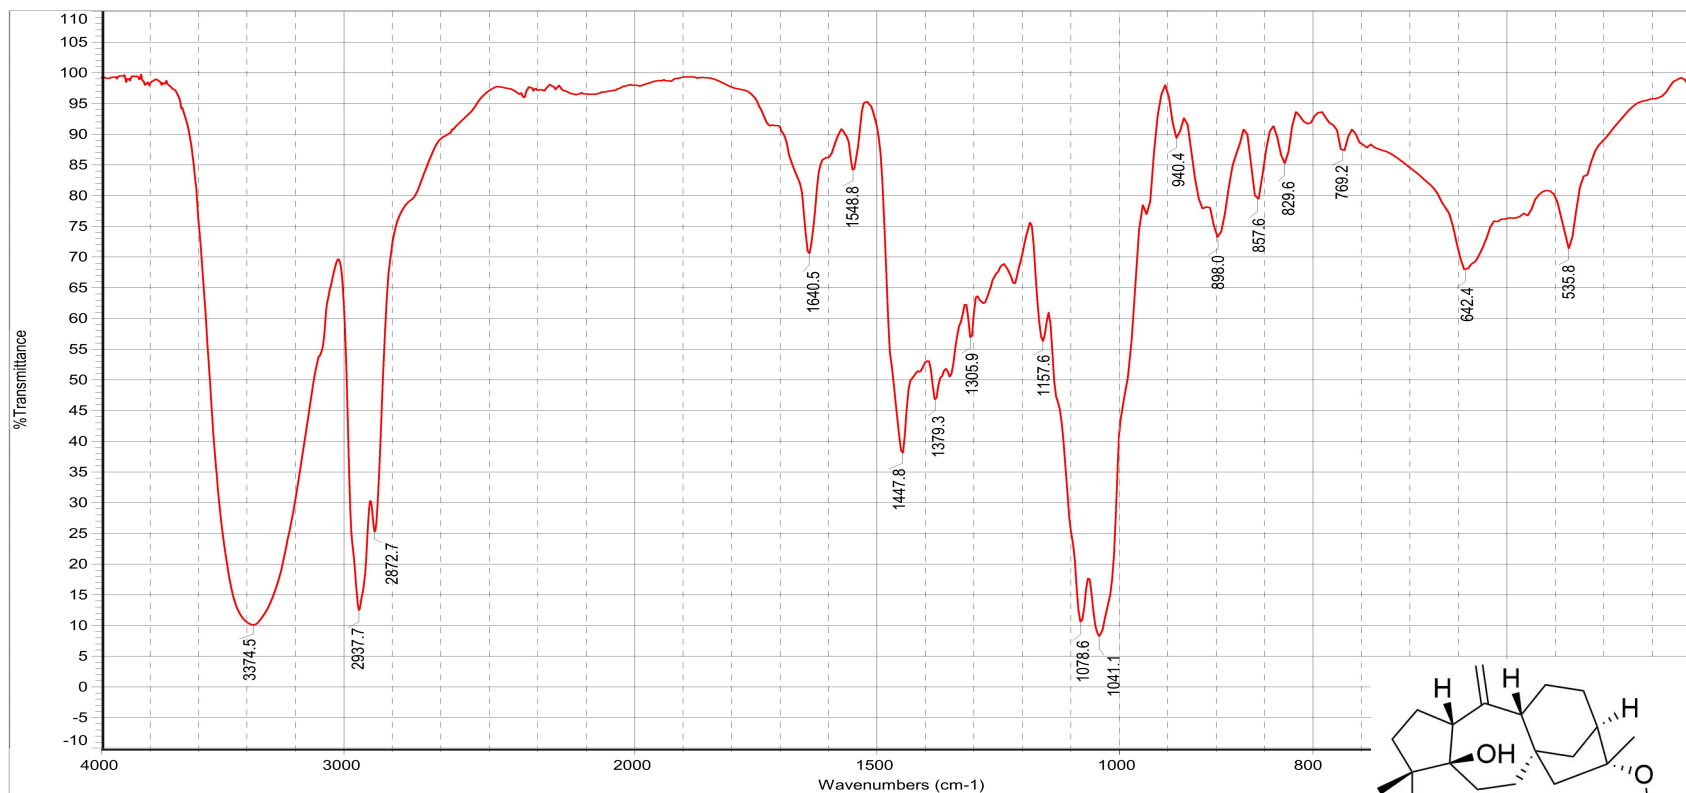

日期: 星期四 11月 03 13:14:12 2016 (GMT+08:00) Sample Name : ZSB - 183

( 显微镜透射法 FT- IR Microscope Transm

扫描次数: 100

傅里叶变换红外显微镜(FT-IR Microscope): Centaurus

分辨率: 8.000

美国热电公司(Thermo)傅里叶变换红外光谱仪:Nicolet 5700

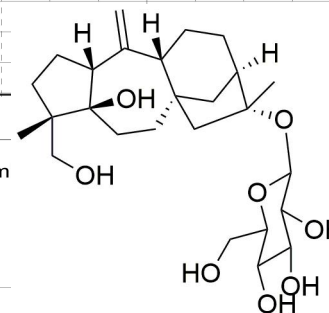

The IR spectrum of **8**

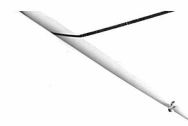

MS Formula Results: + Scan (7.433 min) Sub (2016061501.d)

| m/z      | Ion                 | Formula                                          | Abundance |
|----------|---------------------|--------------------------------------------------|-----------|
| 505.2788 | (M+Na) <sup>+</sup> | C <sub>26</sub> H <sub>42</sub> NaO <sub>8</sub> | 512537.3  |

  

| Best | Formula (M)                                                   | Ion Formula                                                     | Score | Cross Sco | Mass     | Calc Mass | Calc m/z | Diff (ppm) | Abs Diff (ppm) | Mass Match | Abund Match | Spacing Match | DBE |
|------|---------------------------------------------------------------|-----------------------------------------------------------------|-------|-----------|----------|-----------|----------|------------|----------------|------------|-------------|---------------|-----|
| ✓    | C <sub>26</sub> H <sub>42</sub> O <sub>8</sub>                | C <sub>26</sub> H <sub>42</sub> NaO <sub>8</sub>                | 99.82 |           | 482.2896 | 482.288   | 505.2772 | -3.29      | 3.29           | 99.66      | 99.95       | 99.98         | 6   |
|      | C <sub>23</sub> H <sub>46</sub> O <sub>8</sub> S              | C <sub>23</sub> H <sub>46</sub> NaO <sub>8</sub> S              | 98.91 |           | 482.2896 | 482.2913  | 505.2806 | 3.69       | 3.69           | 99.58      | 97.18       | 99.66         | 1   |
|      | C <sub>27</sub> H <sub>46</sub> O <sub>3</sub> S <sub>2</sub> | C <sub>27</sub> H <sub>46</sub> NaO <sub>3</sub> S <sub>2</sub> | 97.6  |           | 482.2896 | 482.2888  | 505.2781 | -1.51      | 1.51           | 99.93      | 92.18       | 99.44         | 5   |
|      | C <sub>24</sub> H <sub>50</sub> O <sub>3</sub> S <sub>3</sub> | C <sub>24</sub> H <sub>50</sub> NaO <sub>3</sub> S <sub>3</sub> | 94.83 |           | 482.2896 | 482.2922  | 505.2814 | 5.48       | 5.48           | 99.07      | 84.14       | 99.19         | 0   |

page 1

The HRESIMS spectrum of **8**

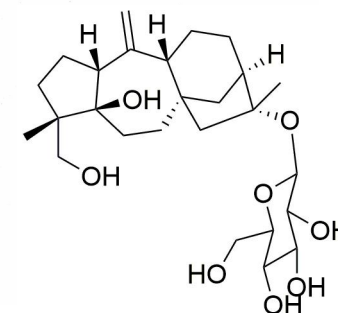

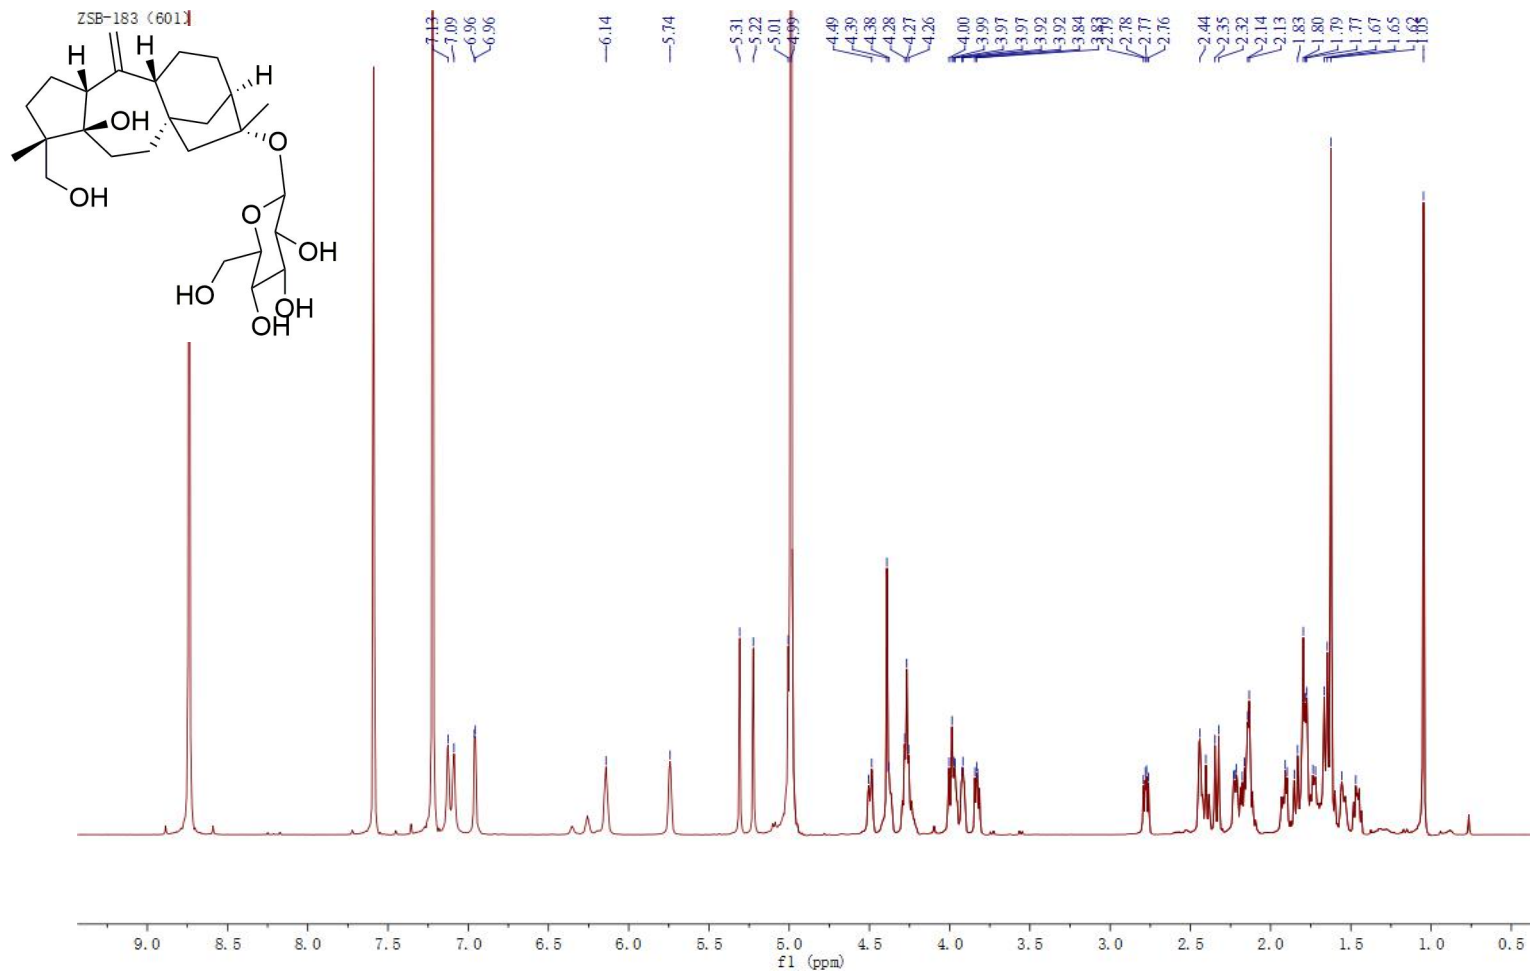

The  $^1\text{H}$  NMR spectrum of **8** in  $\text{C}_5\text{D}_5\text{N}$  (600 MHz)

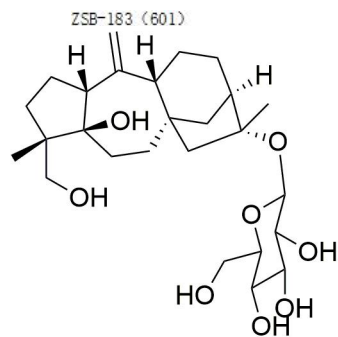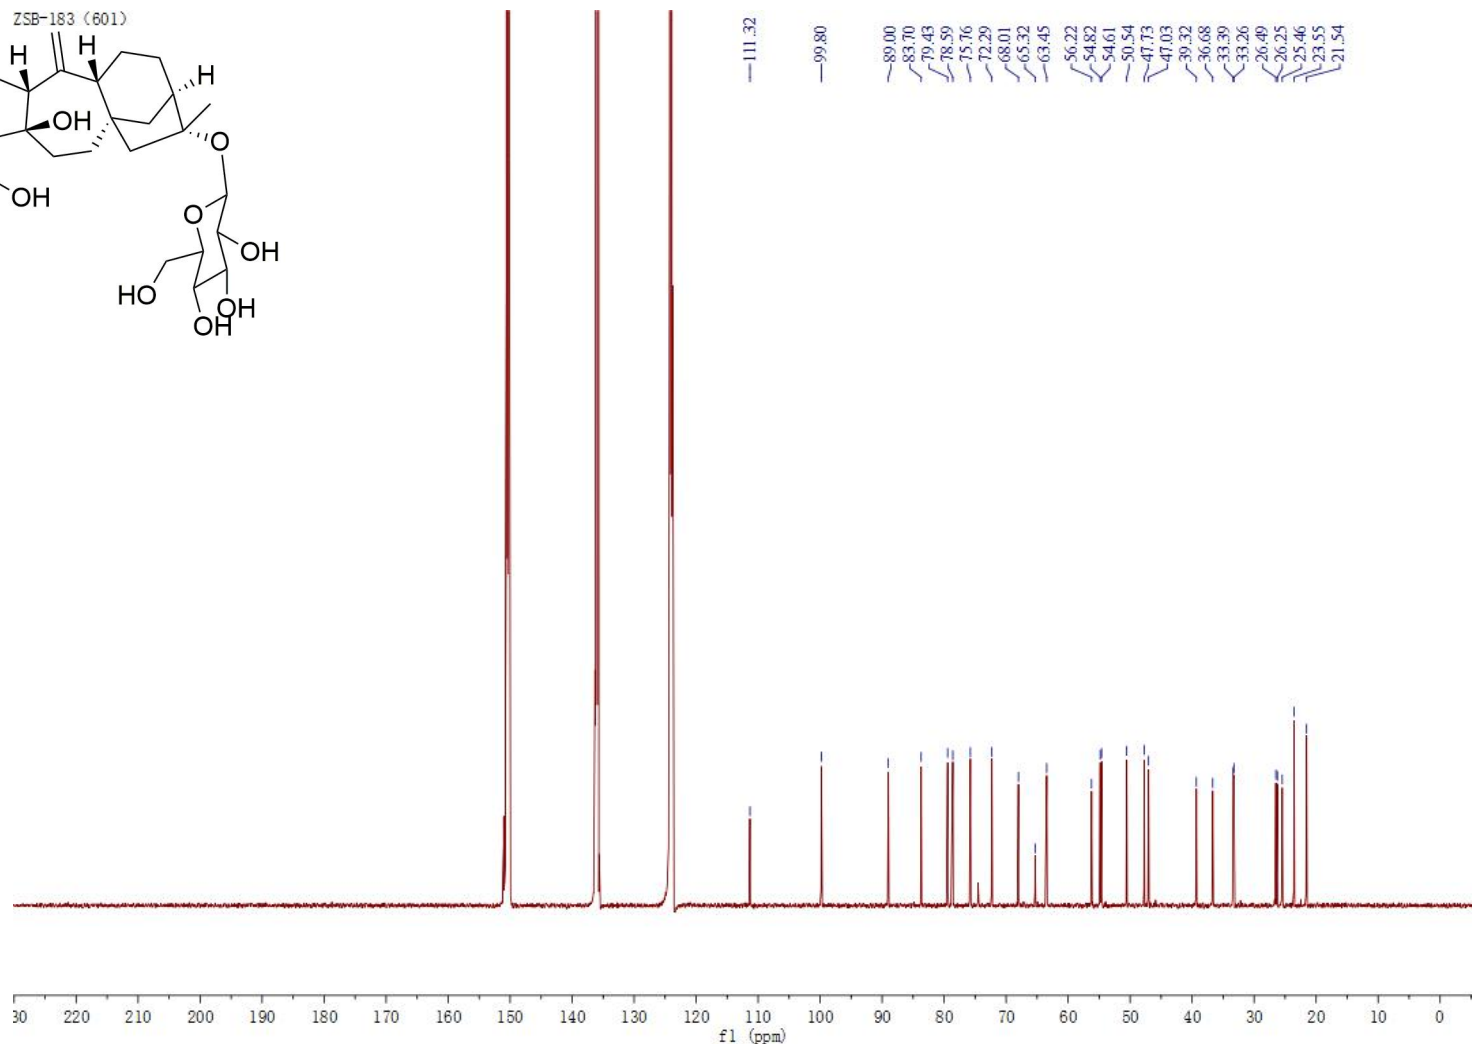

The  $^{13}\text{C}$  NMR spectrum of **8** in  $\text{C}_5\text{D}_5\text{N}$  (150 MHz)

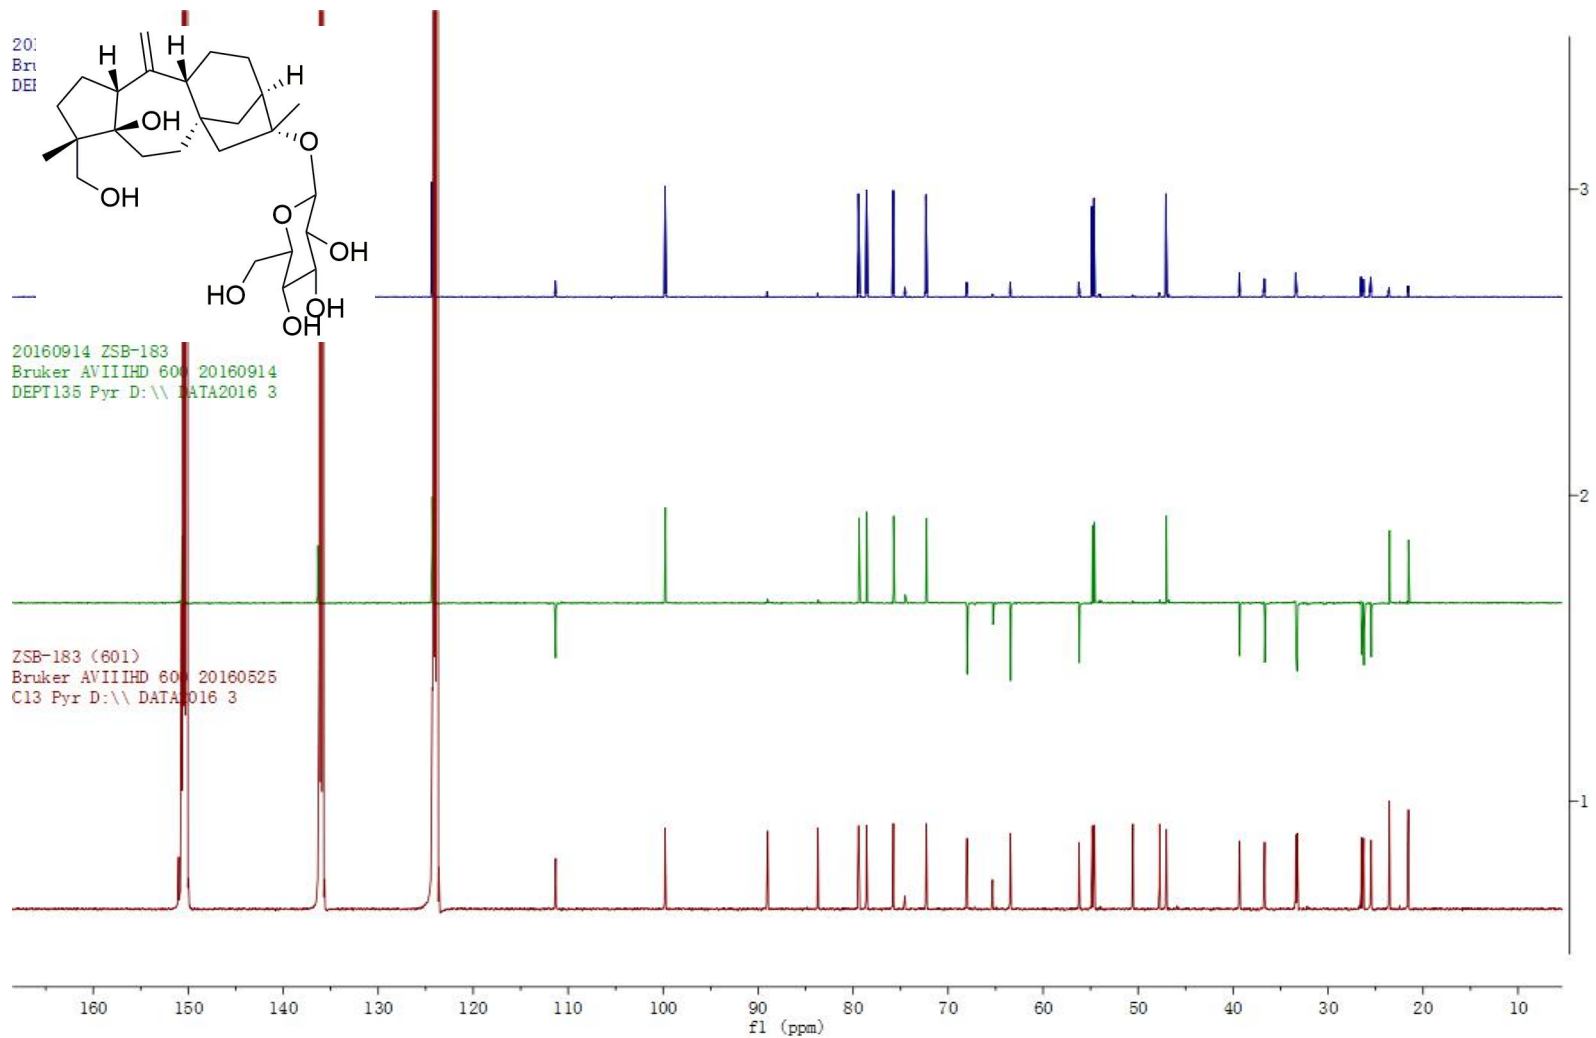

The DEPT spectrum of **8** in C<sub>5</sub>D<sub>5</sub>N (150 MHz)

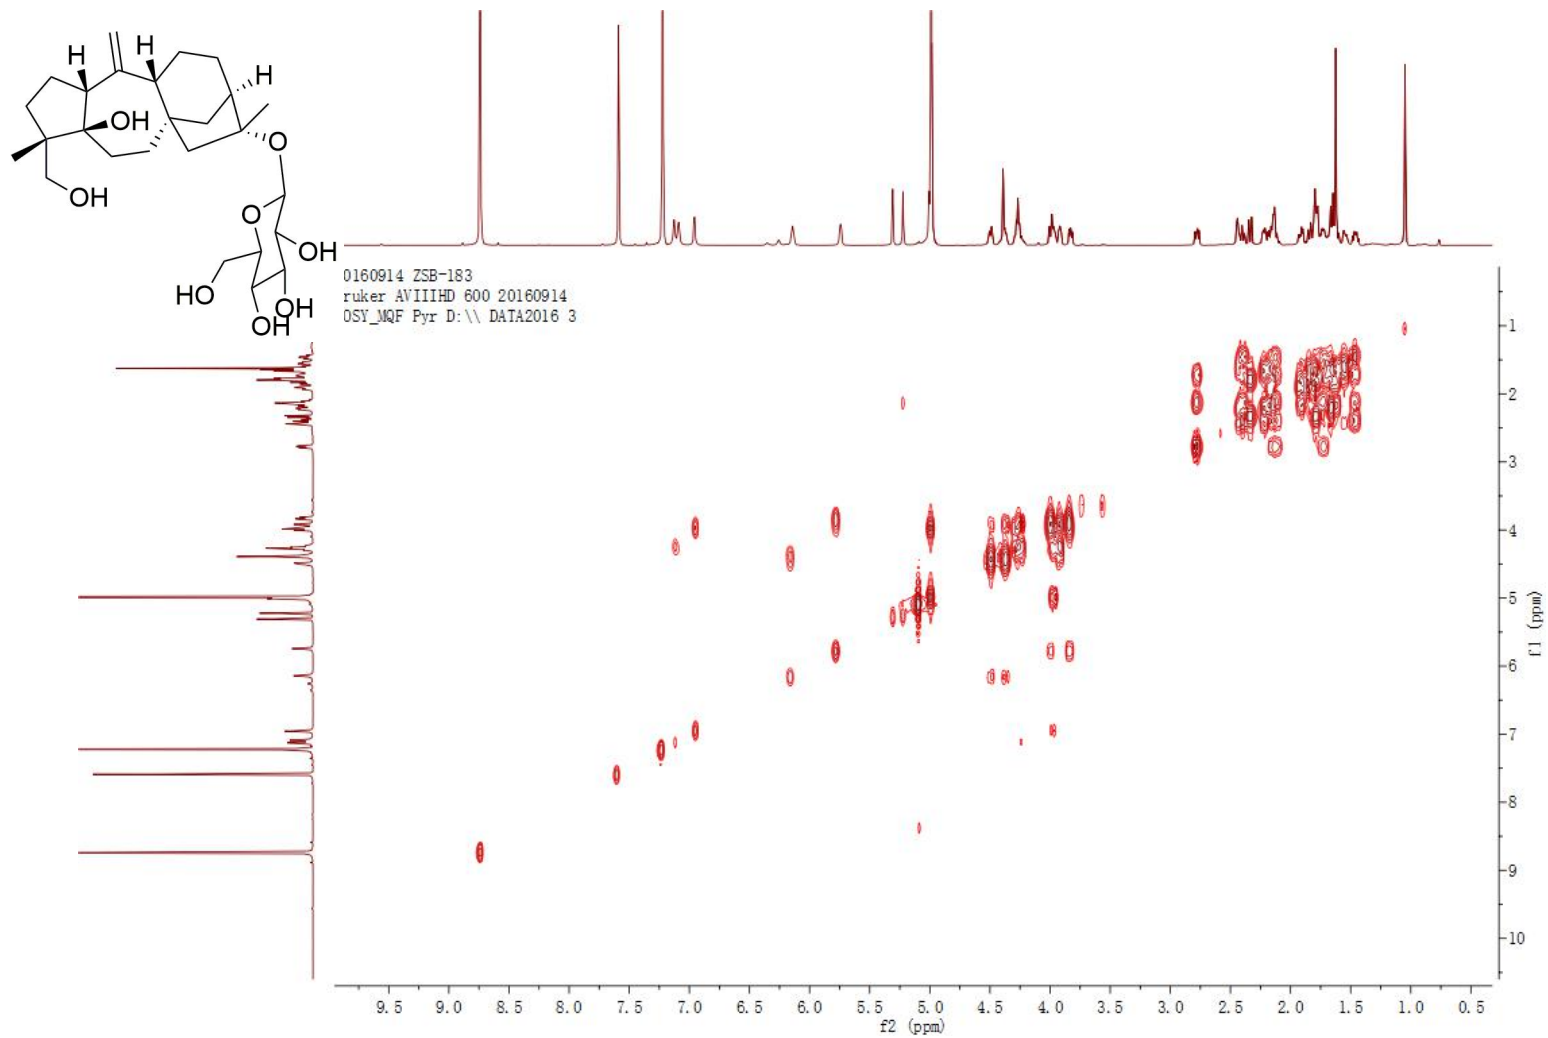

The COSY spectrum of **8** in  $C_5D_5N$  (600 MHz)

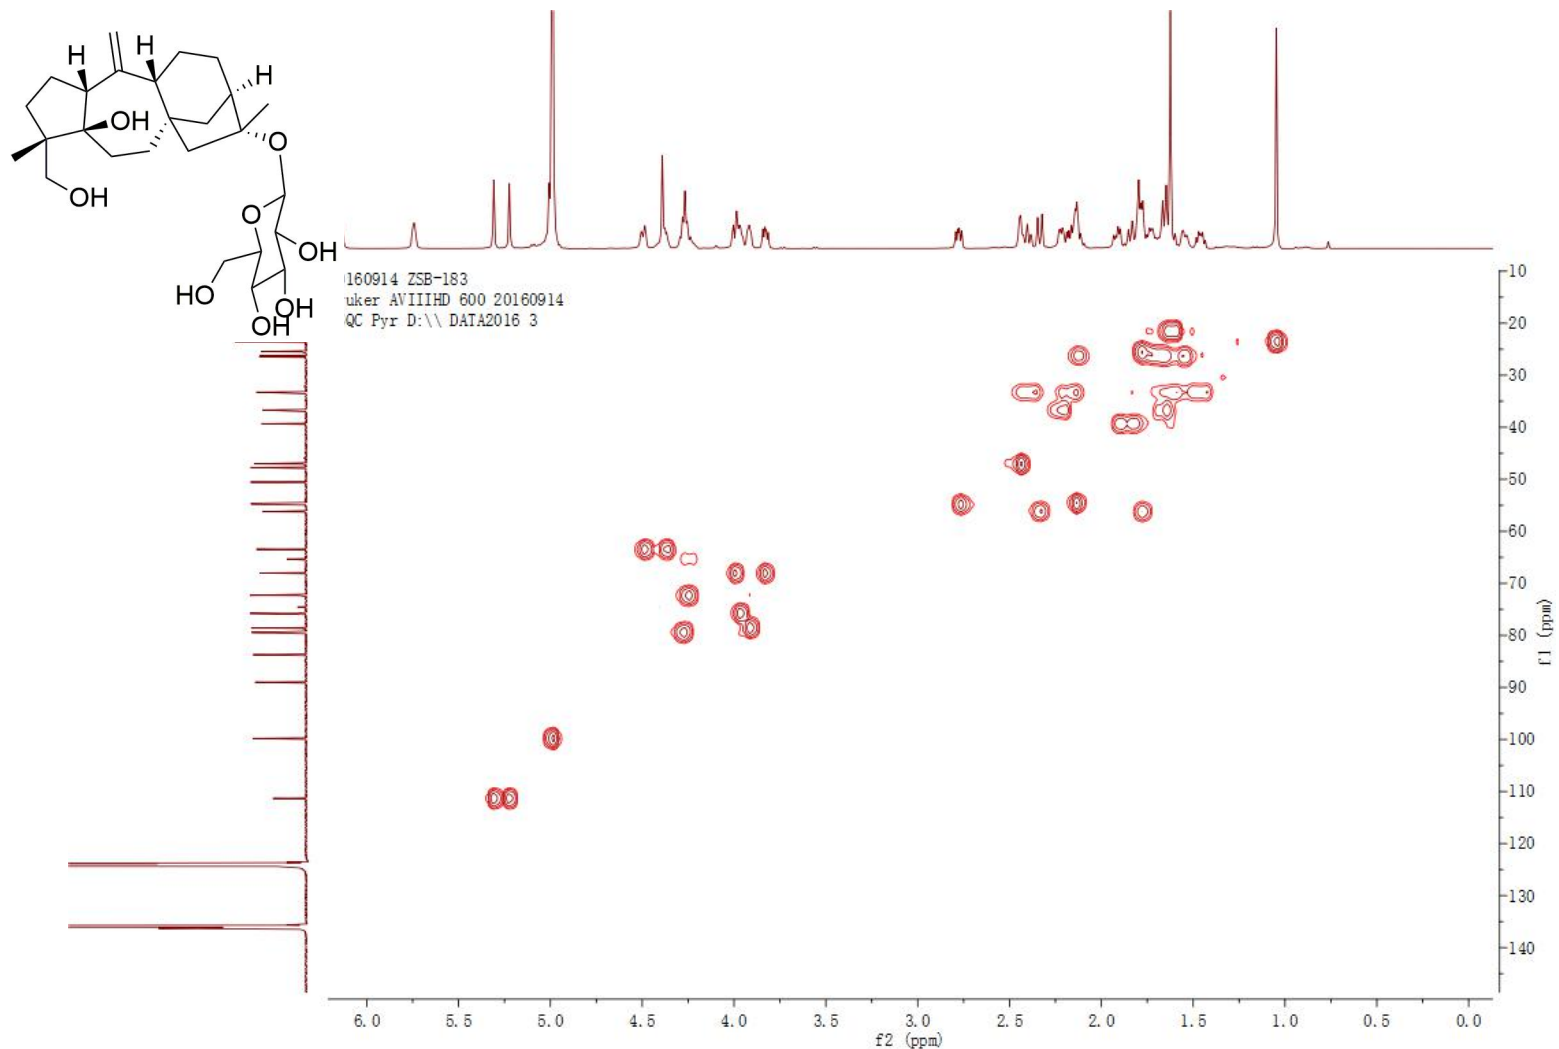

The HSQC spectrum of **8** in  $C_5D_5N$  ( $^1H$ : 600 MHz,  $^{13}C$ : 150 MHz)



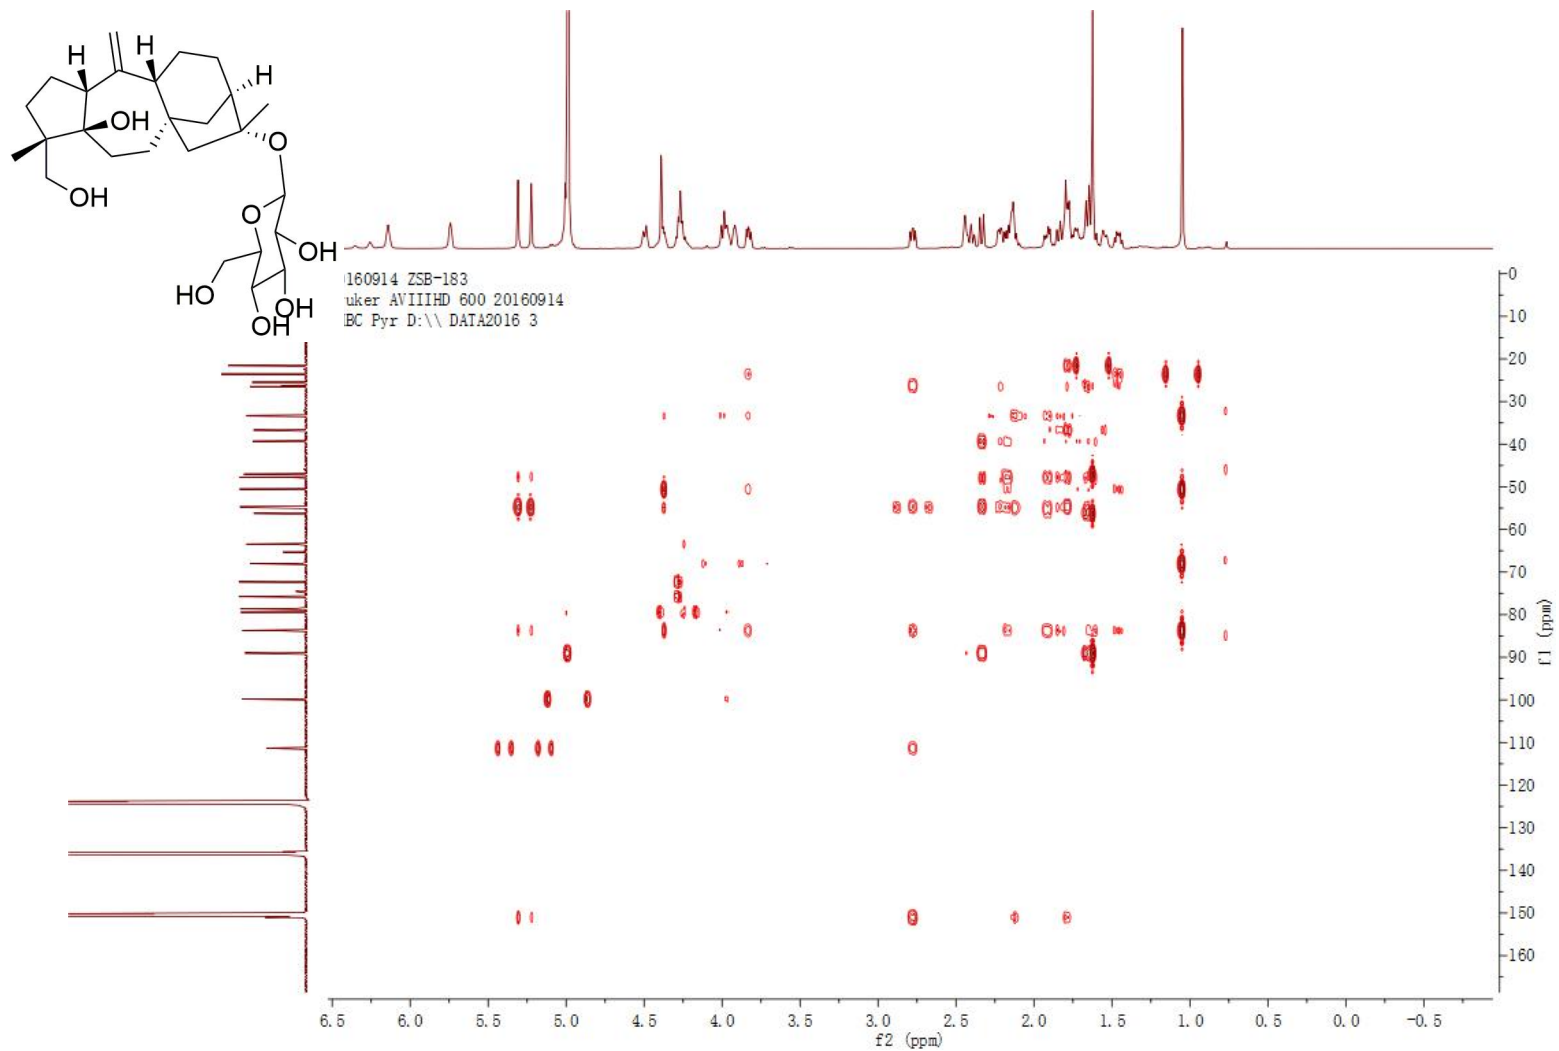

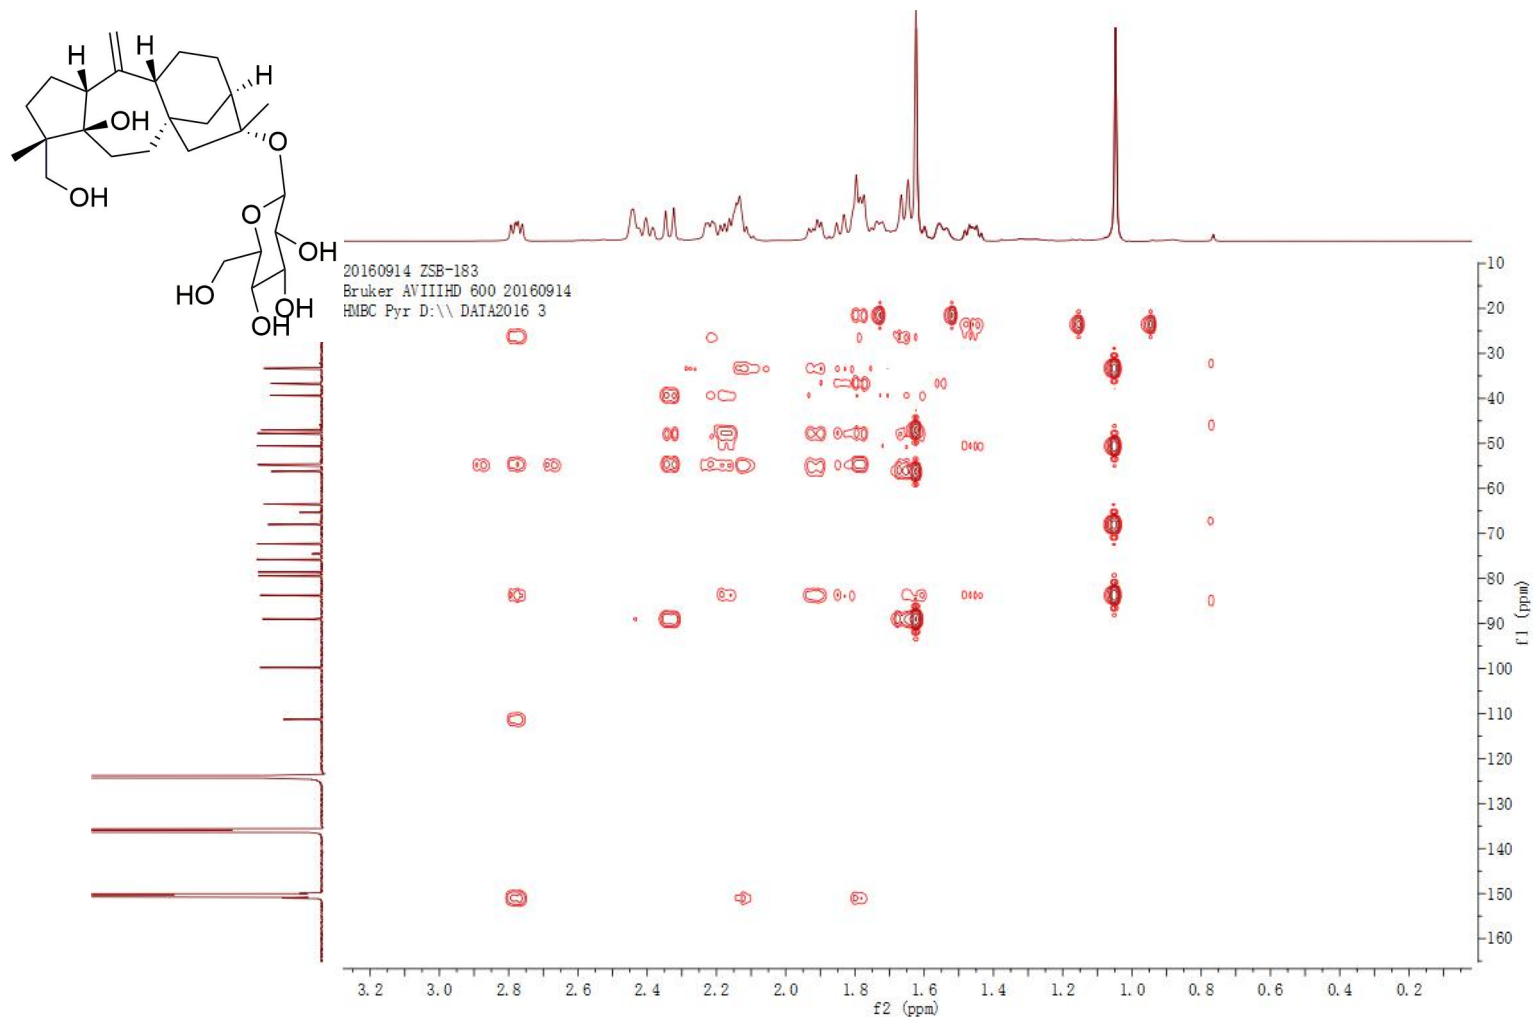

The HMBC spectrum (amplified) of **8** in  $C_5D_5N$  ( $^1H$ : 600 MHz,  $^{13}C$ : 150 MHz)

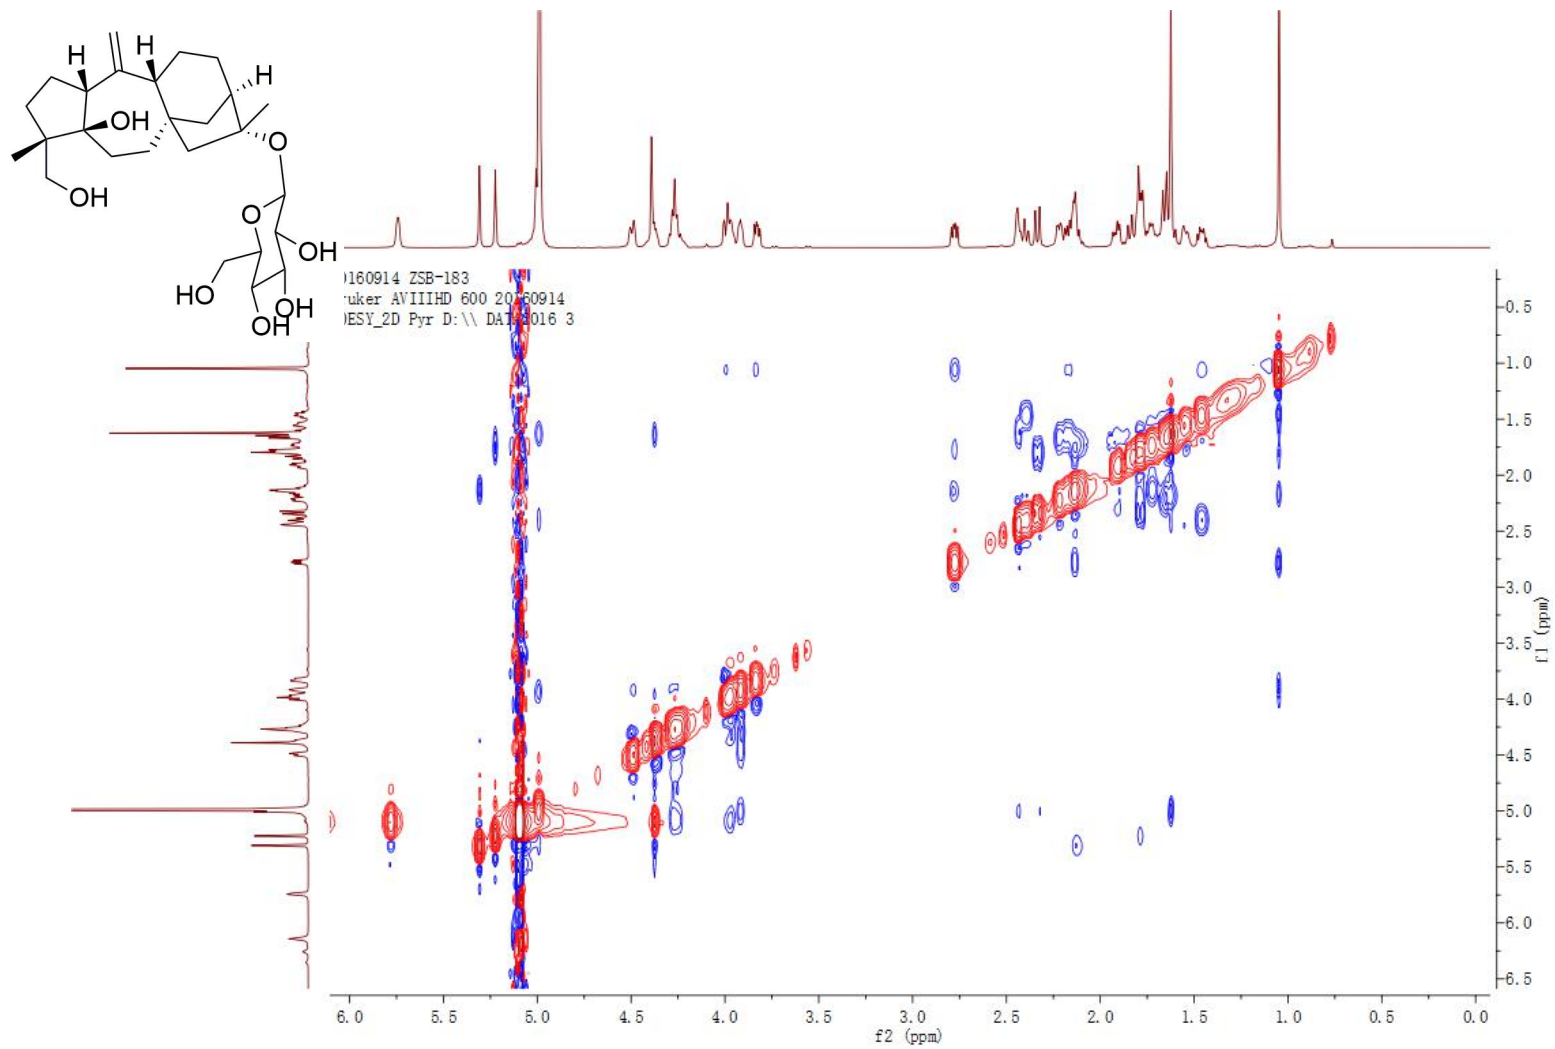

The NOESY spectrum of **8** in  $C_5D_5N$  (600 MHz)

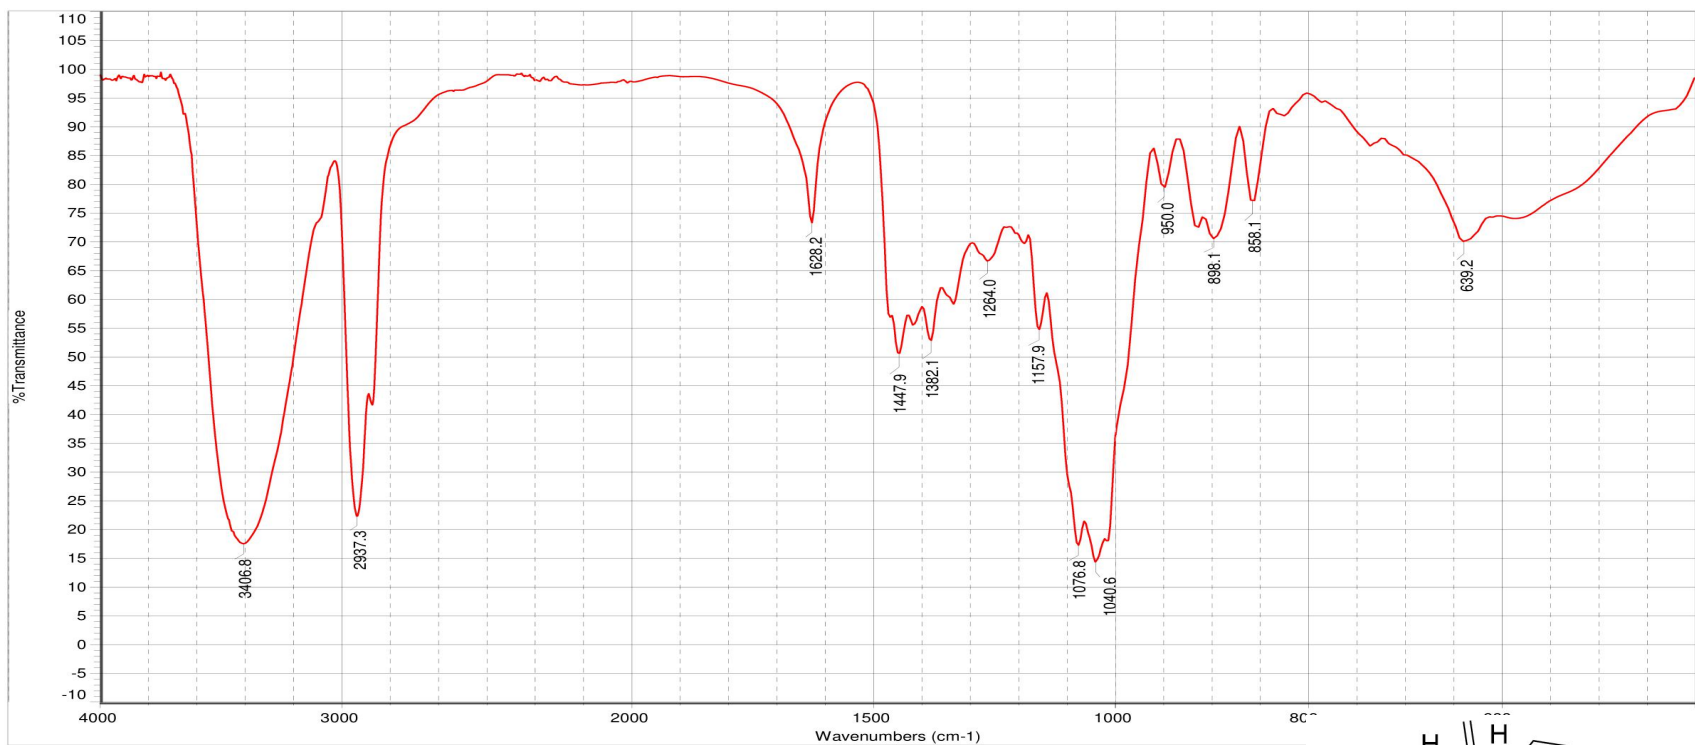

日期: 星期四 11月 03 10:32:21 2016 (GMT+08:00) Sample Name : ZSB - 151

( 显微镜透射法 FT- IR Microscope T

扫描次数: 100

傅里叶变换红外显微镜 (FT-IR Microscope): Centaurus

分辨率: 8.000

美国热电公司 (Thermo) 傅里叶变换红外光谱仪: Nicolet 5700

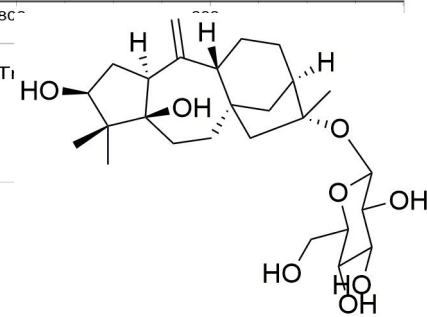

The IR spectrum of 9

MS Formula Results: + Scan (6.399 min) Sub (2016032906.d)

| m/z      | Ion                 | Formula       | Abundance |
|----------|---------------------|---------------|-----------|
| 505.2775 | (M+Na) <sup>+</sup> | C26 H42 Na O8 | 35799.6   |

  

| Best                                | Formula (M)          | Ion Formula             | Score | Cross Sco | Mass     | Calc Mass | Calc m/z | Diff (ppm) | Abs Diff (ppm) | Mass Match | Abund Match | Spacing Match | DBE |
|-------------------------------------|----------------------|-------------------------|-------|-----------|----------|-----------|----------|------------|----------------|------------|-------------|---------------|-----|
| <input checked="" type="checkbox"/> | C26 H42 O8           | C26 H42 Na O8           | 99.35 |           | 482.2882 | 482.288   | 505.2772 | -0.47      | 0.47           | 99.99      | 99.67       | 97.7          | 6   |
| <input type="checkbox"/>            | C30 H42 O3 S         | C30 H42 Na O3 S         | 98.51 |           | 482.2882 | 482.2855  | 505.2747 | -5.67      | 5.67           | 99         | 97.17       | 99.13         | 10  |
| <input type="checkbox"/>            | C27 H46 O3 S2        | C27 H46 Na O3 S2        | 98.1  |           | 482.2882 | 482.2888  | 505.2781 | 1.31       | 1.31           | 99.95      | 93.77       | 99.61         | 5   |
| <input type="checkbox"/>            | C26 H46 O4 S Si      | C26 H46 Na O4 S Si      | 98.02 |           | 482.2882 | 482.2886  | 505.2778 | 0.82       | 0.82           | 99.98      | 93.46       | 99.57         | 5   |
| <input type="checkbox"/>            | C25 H46 O5 Si2       | C25 H46 Na O5 Si2       | 97.54 |           | 482.2882 | 482.2884  | 505.2776 | 0.32       | 0.32           | 100        | 91.84       | 99.47         | 5   |
| <input type="checkbox"/>            | C29 H46 S Si2        | C29 H46 Na S Si2        | 94.58 |           | 482.2882 | 482.2859  | 505.2751 | -4.86      | 4.86           | 99.26      | 82.54       | 99.66         | 9   |
| <input type="checkbox"/>            | C28 H46 O Si3        | C28 H46 Na O Si3        | 93.71 |           | 482.2882 | 482.2856  | 505.2749 | -5.35      | 5.35           | 99.11      | 79.84       | 99.58         | 9   |
| <input type="checkbox"/>            | C26 H50 S2 Si2       | C26 H50 Na S2 Si2       | 93.68 |           | 482.2882 | 482.2892  | 505.2785 | 2.12       | 2.12           | 99.86      | 78.24       | 99.83         | 4   |
| <input type="checkbox"/>            | C25 H50 O S Si3      | C25 H50 Na O S Si3      | 93.28 |           | 482.2882 | 482.289   | 505.2782 | 1.63       | 1.63           | 99.92      | 76.78       | 99.78         | 4   |
| <input type="checkbox"/>            | C29 H43 Cl N2 Si     | C29 H43 Cl N2 Na Si     | 83.85 |           | 482.2882 | 482.2884  | 505.2776 | 0.39       | 0.39           | 100        | 43.62       | 99.85         | 10  |
| <input type="checkbox"/>            | C28 H48 Cl2 Si       | C28 H48 Cl2 Na Si       | 74.68 |           | 482.2882 | 482.2902  | 505.2795 | 4.19       | 4.19           | 99.45      | 12.39       | 99.89         | 5   |
| <input type="checkbox"/>            | C23 H48 Cl2 N2 O2 Si | C23 H48 Cl2 N2 Na O2 Si | 74.37 |           | 482.2882 | 482.2862  | 505.2754 | -4.16      | 4.16           | 99.46      | 11.27       | 99.93         | 1   |
| <input type="checkbox"/>            | C24 H48 Cl2 N2 O S   | C24 H48 Cl2 N2 Na O S   | 74.05 |           | 482.2882 | 482.2864  | 505.2757 | -3.66      | 3.66           | 99.58      | 9.99        | 99.85         | 1   |

page 1

The HRESIMS spectrum of **9**

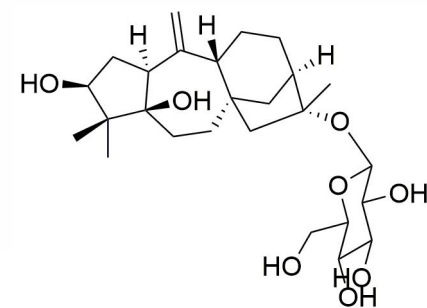

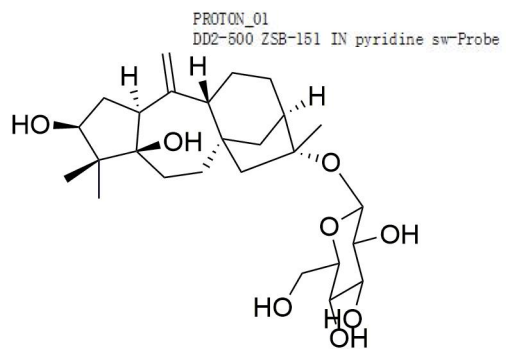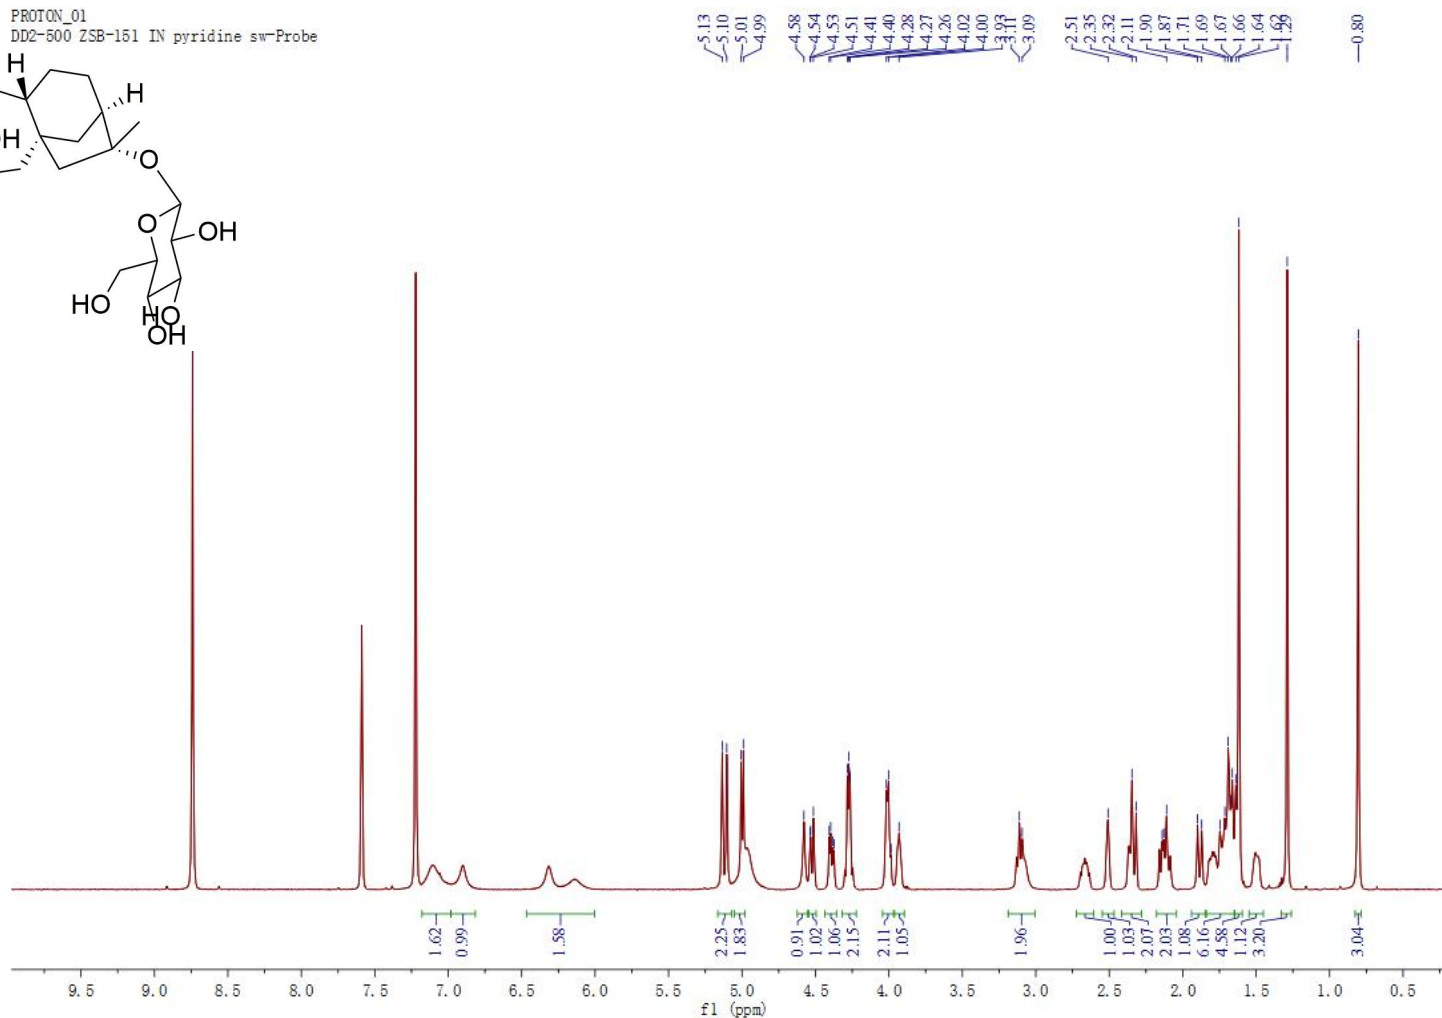

The  $^1\text{H}$  NMR spectrum of **9** in  $\text{C}_5\text{D}_5\text{N}$  (500 MHz)

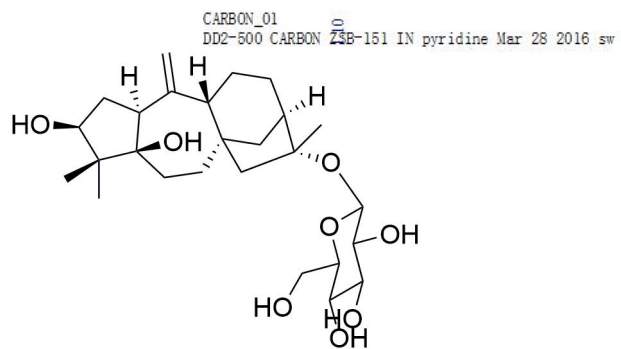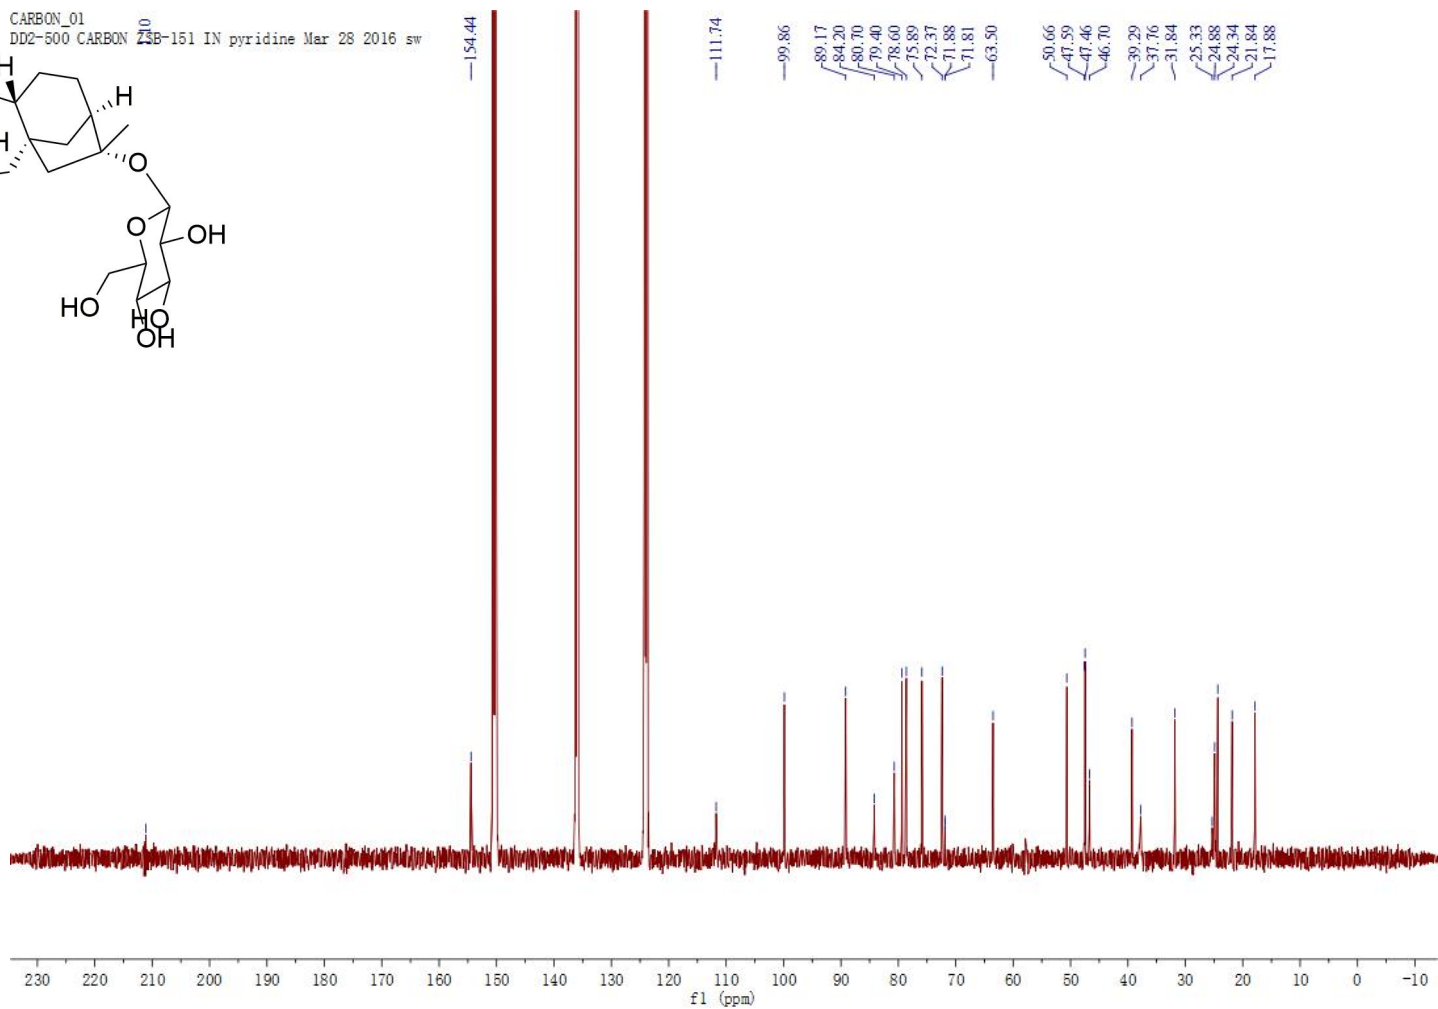

The  $^{13}\text{C}$  NMR spectrum of **9** in  $\text{C}_5\text{D}_5\text{N}$  (125 MHz)

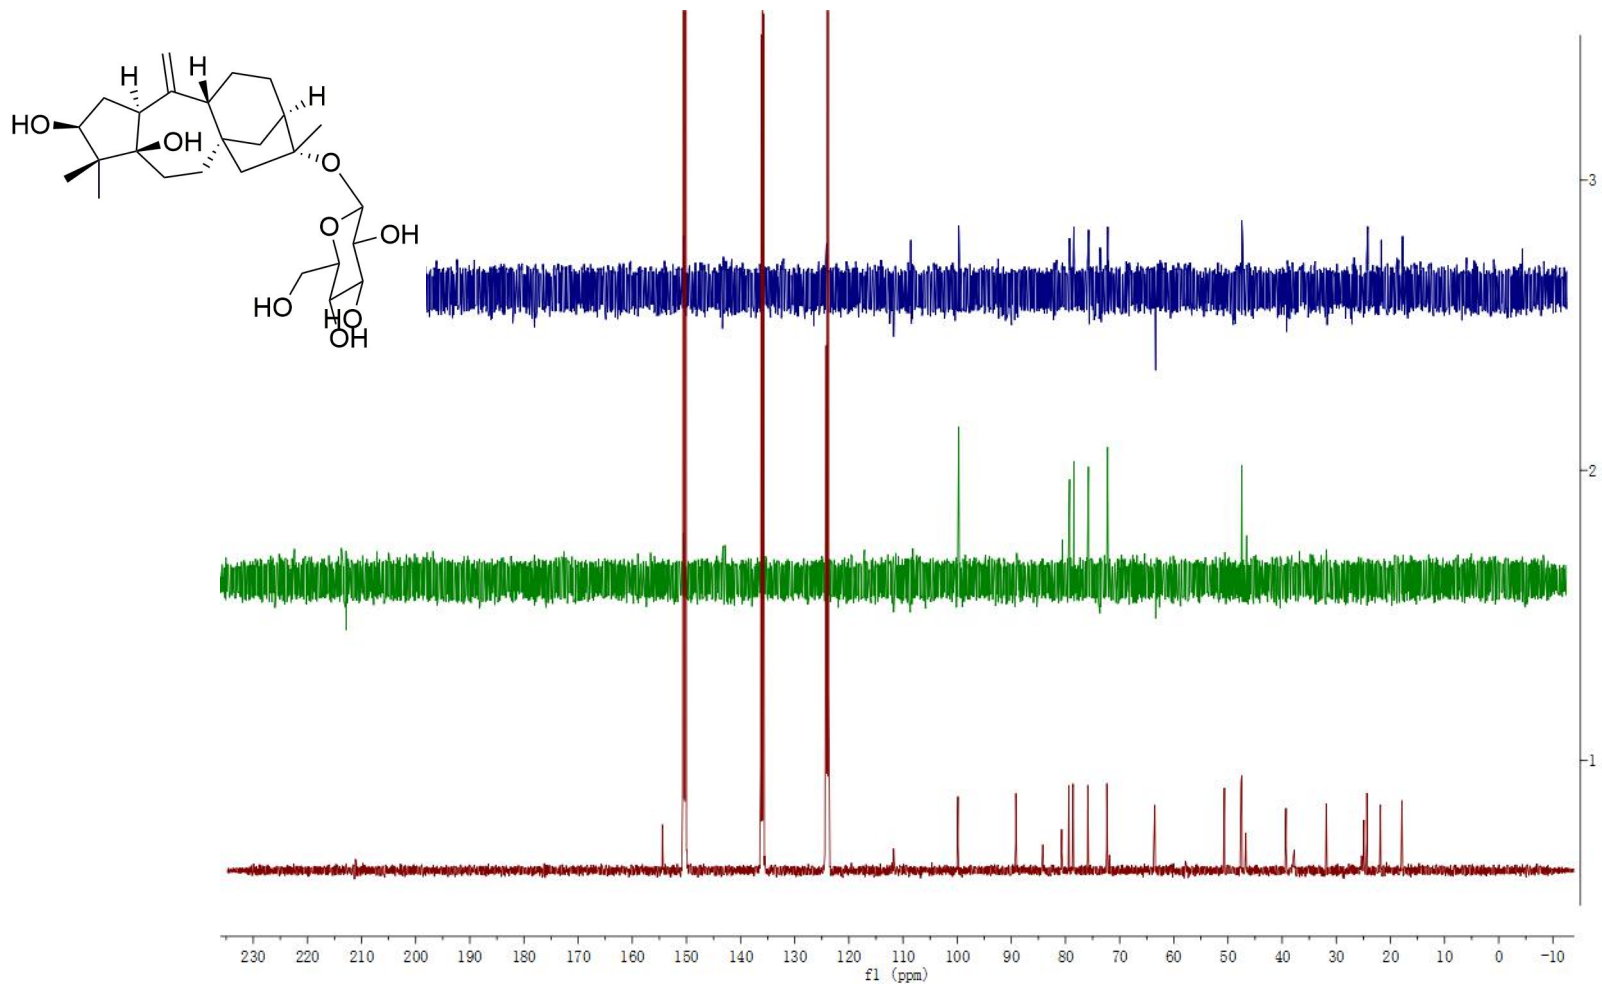

The DEPT spectrum of **9** in  $C_5D_5N$  (125 MHz)



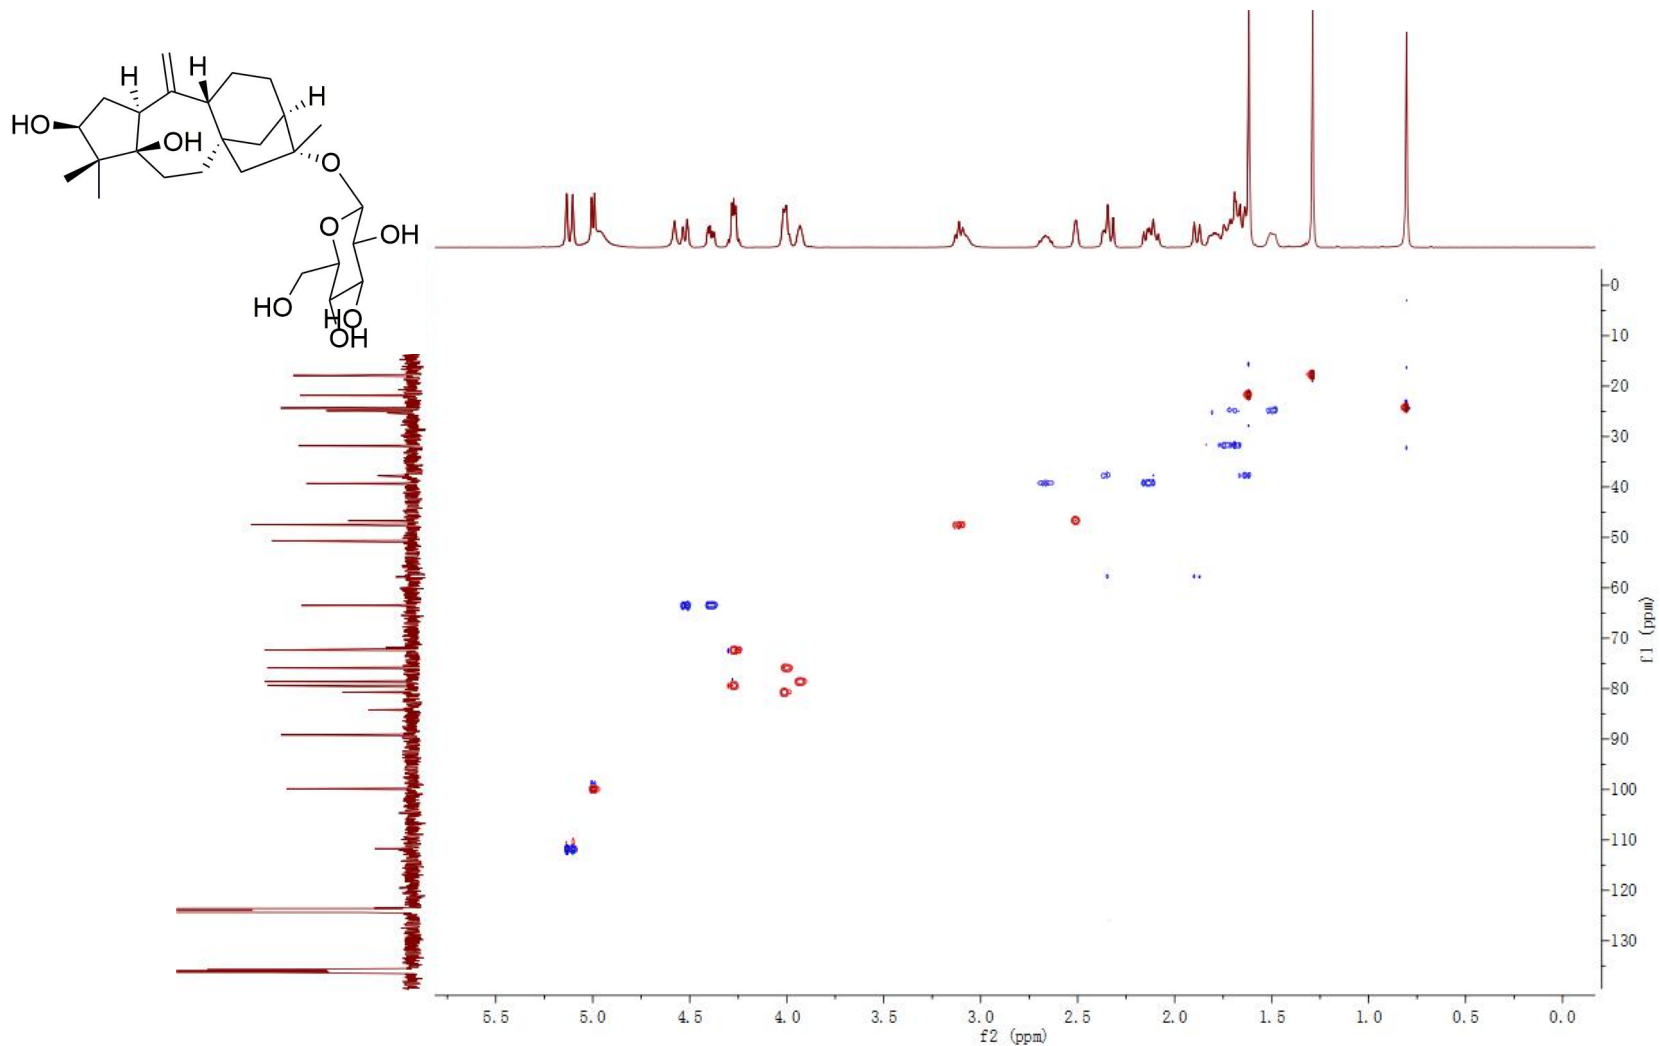

The HSQC spectrum of **9** in  $\text{C}_5\text{D}_5\text{N}$  ( $^1\text{H}$ : 500 MHz,  $^{13}\text{C}$ : 125 MHz)

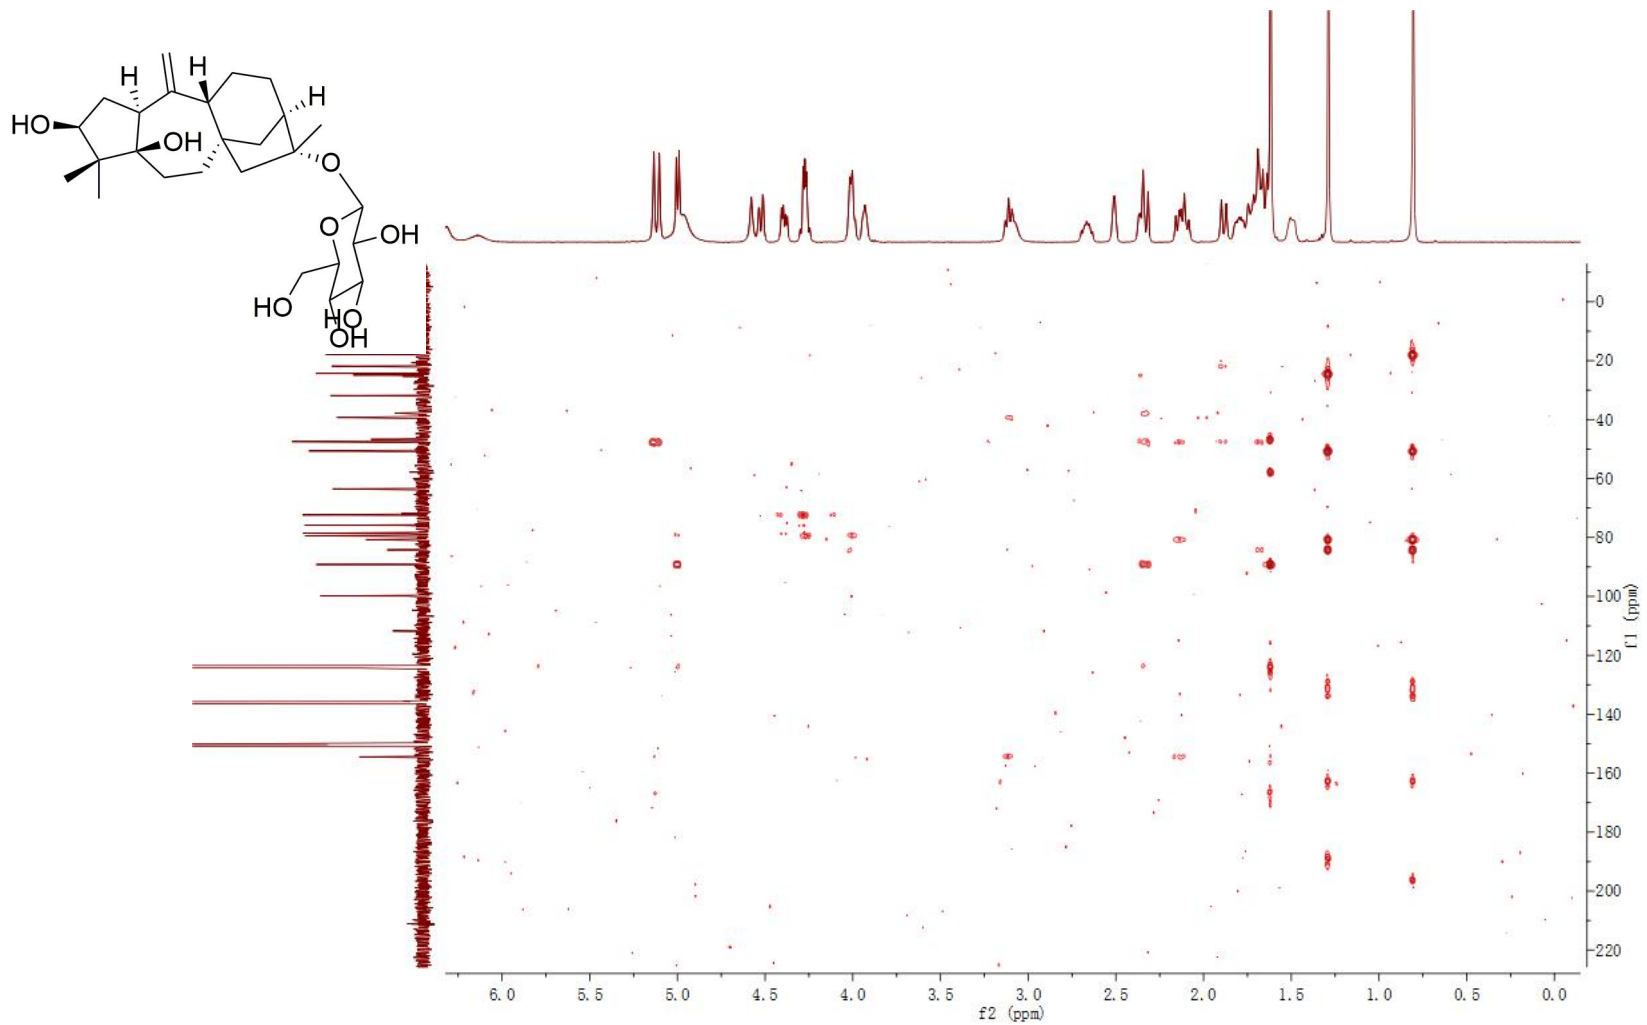

The HMBC spectrum of **9** in  $C_5D_5N$  ( $^1H$ : 500 MHz,  $^{13}C$ : 125 MHz)

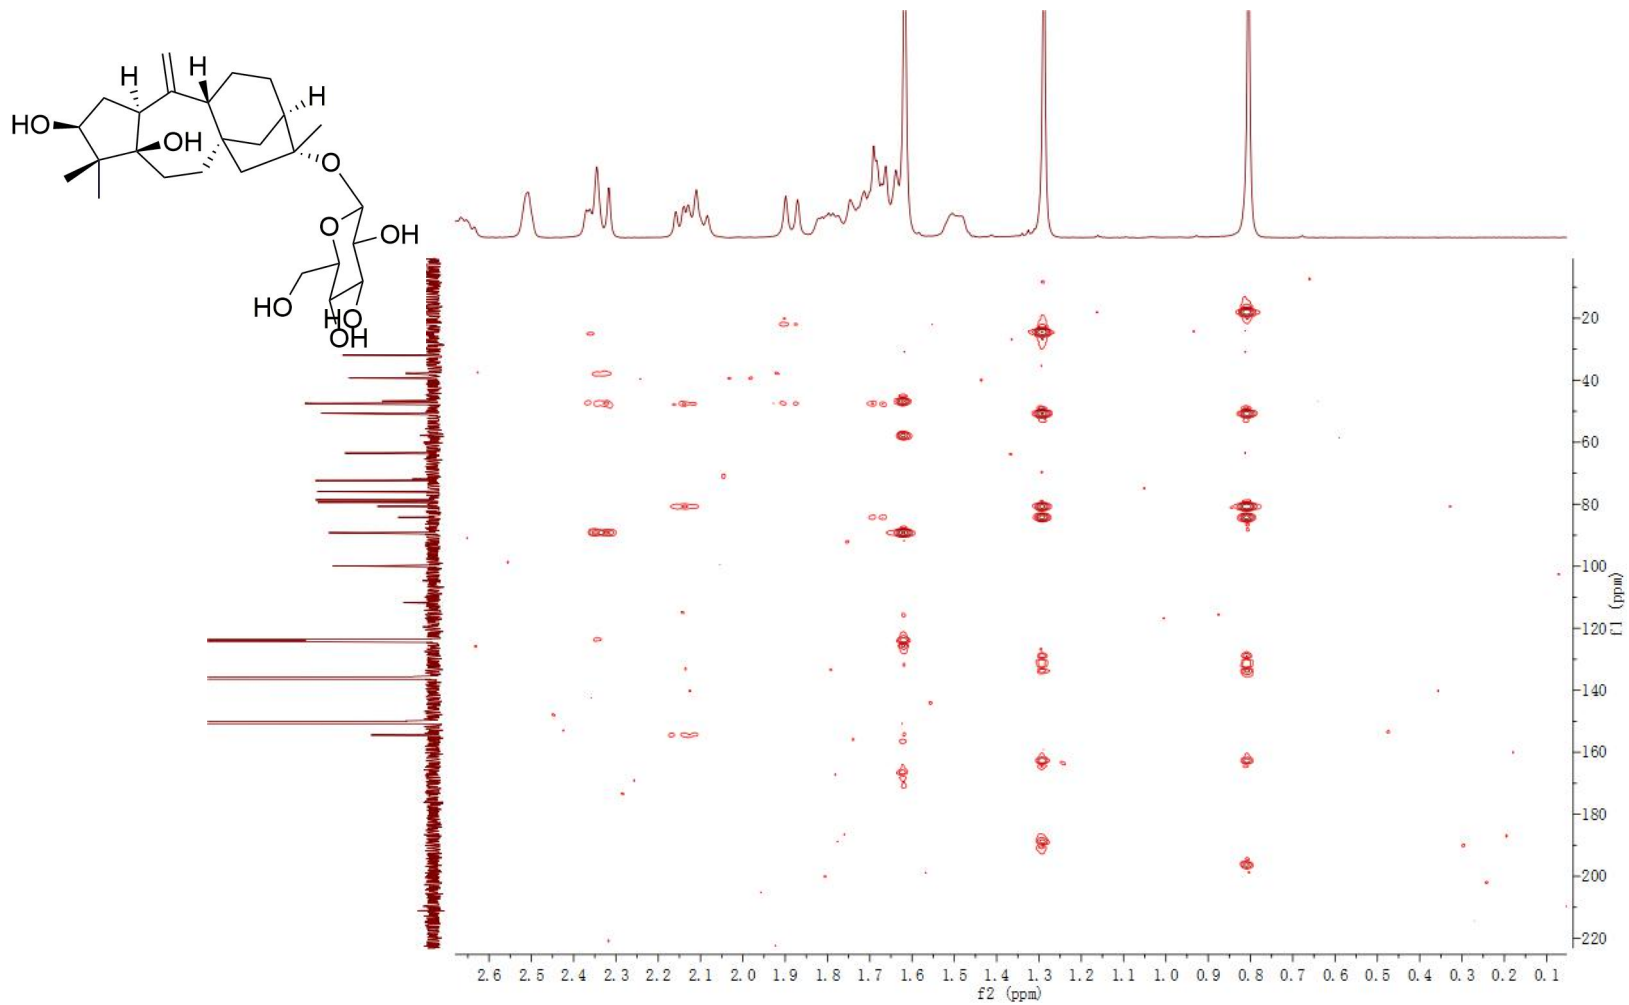

The HMBC spectrum (amplified) of **9** in  $\text{C}_5\text{D}_5\text{N}$  ( $^1\text{H}$ : 500 MHz,  $^{13}\text{C}$ : 125 MHz)

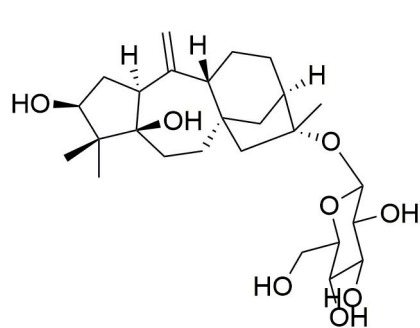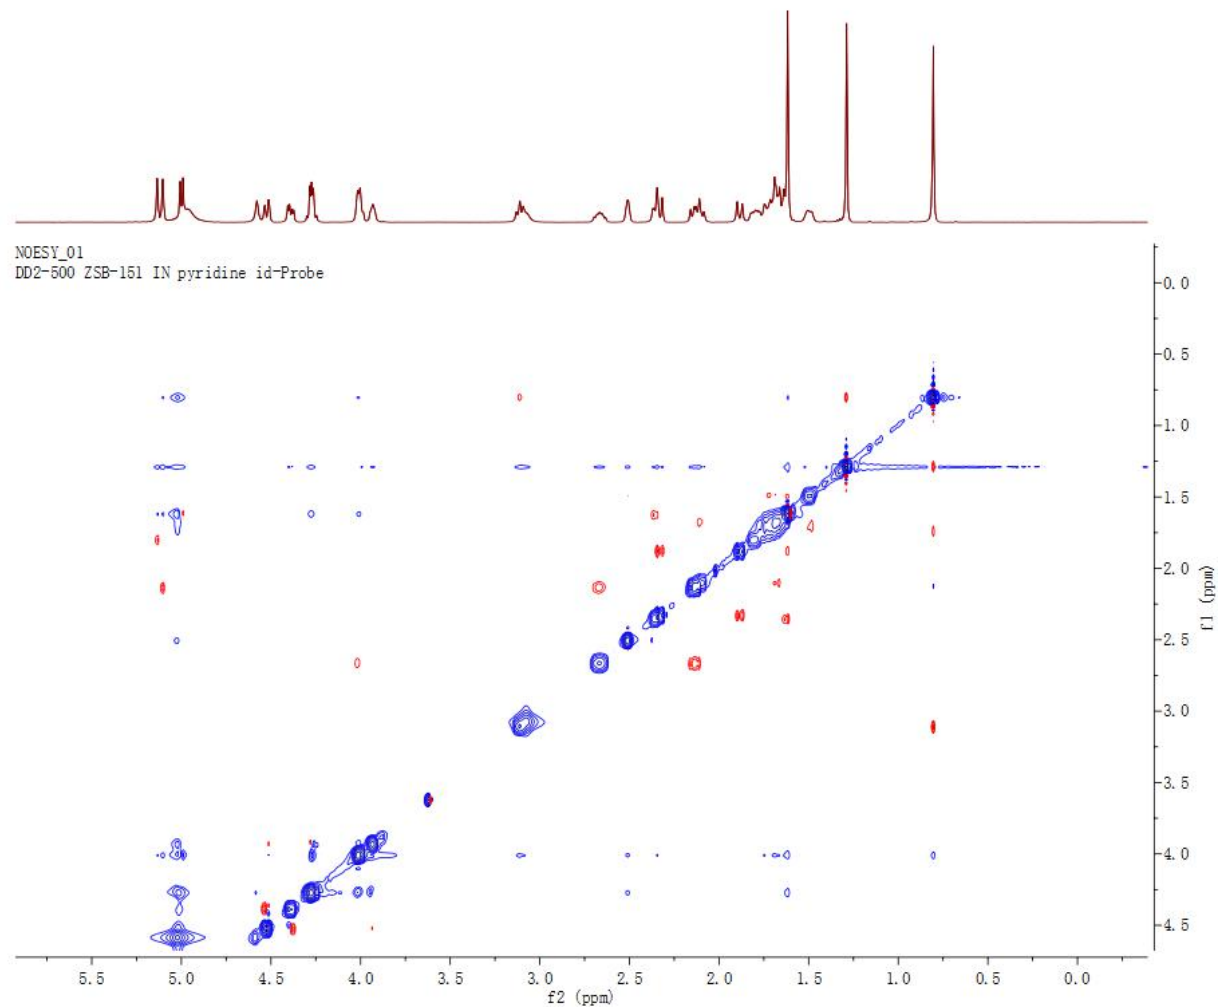

The NOESY spectrum of **9** in C<sub>5</sub>D<sub>5</sub>N (500 MHz)

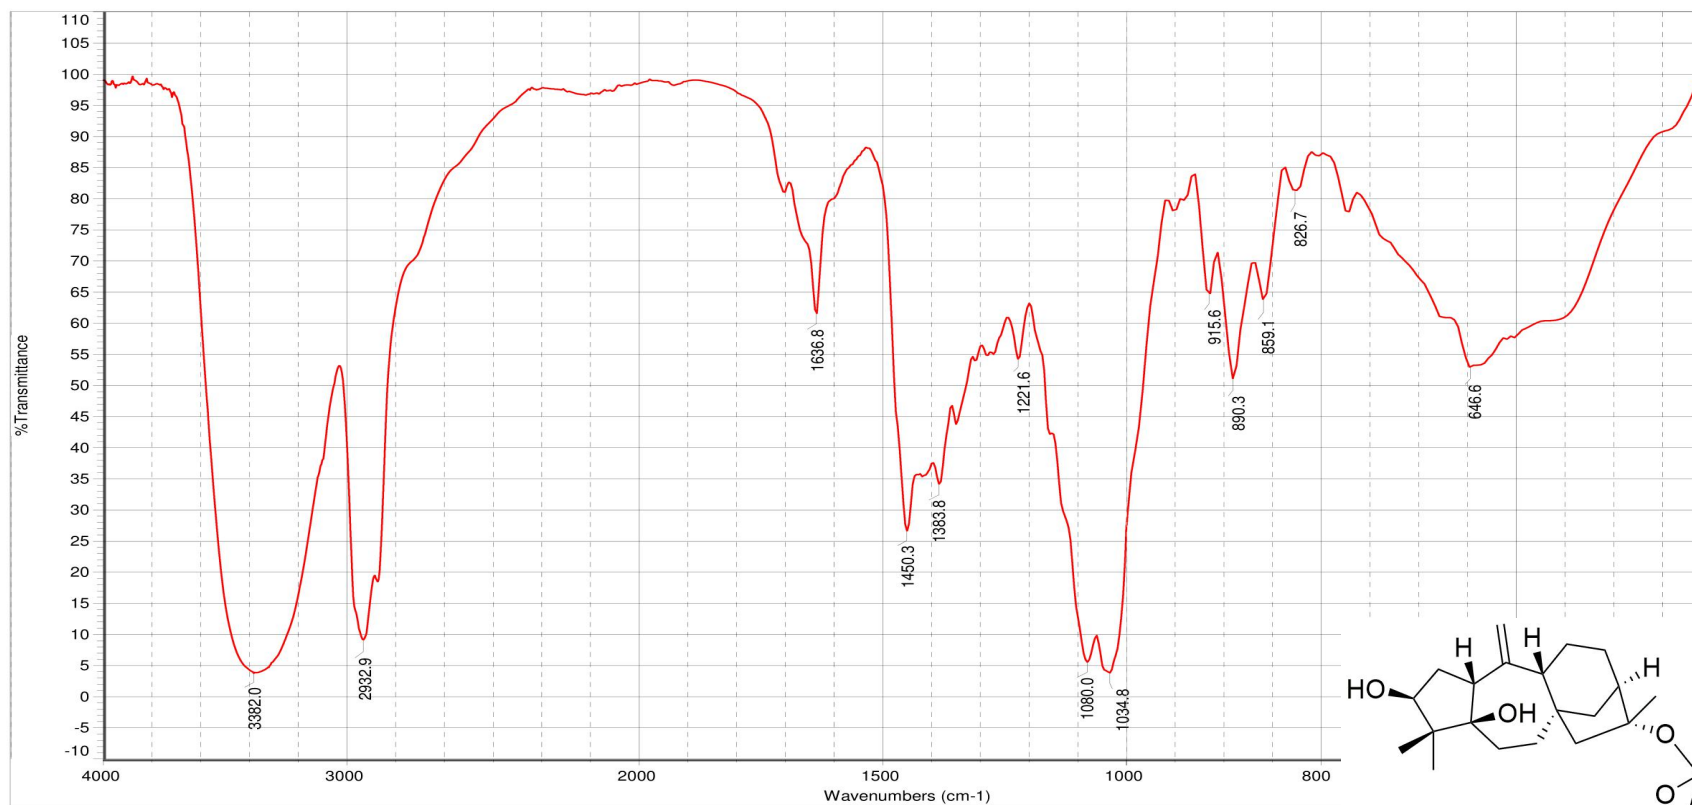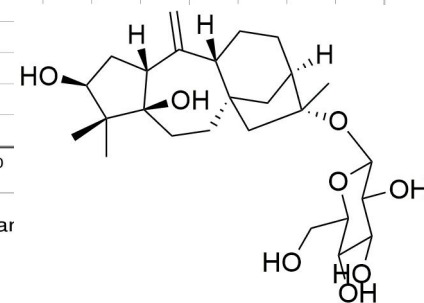

日期: 星期四 11月 03 13:44:23 2016 (GMT+08:00) Sample Name : ZSB - 188 (显微镜透射法 FT- IR Microscope Trar

扫描次数: 100

傅里叶变换红外显微镜(FT-IR Microscope): Centaurus

分辨率: 8.000

美国热电公司(Thermo)傅里叶变换红外光谱仪:Nicolet 5700

The IR spectrum of **10**

MS Formula Results: + Scan (7.005 min) Sub (2016052603.d)

| m/z      | Ion                 | Formula                                          | Abundance |
|----------|---------------------|--------------------------------------------------|-----------|
| 505.2766 | (M+Na) <sup>+</sup> | C <sub>26</sub> H <sub>42</sub> NaO <sub>8</sub> | 71321.1   |

  

| Best                                | Formula (M)                                                                  | Ion Formula                                                                    | Score | Cross Sco | Mass     | Calc Mass | Calc m/z | Diff (ppm) | Abs Diff (ppm) | Mass Match | Abund Match | Spacing Match | DBE |
|-------------------------------------|------------------------------------------------------------------------------|--------------------------------------------------------------------------------|-------|-----------|----------|-----------|----------|------------|----------------|------------|-------------|---------------|-----|
| <input checked="" type="checkbox"/> | C <sub>26</sub> H <sub>42</sub> O <sub>8</sub>                               | C <sub>26</sub> H <sub>42</sub> NaO <sub>8</sub>                               | 99.67 |           | 482.2874 | 482.288   | 505.2772 | 1.25       | 1.25           | 99.95      | 99.63       | 99.16         | 6   |
| <input type="checkbox"/>            | C <sub>30</sub> H <sub>42</sub> O <sub>3</sub> S                             | C <sub>30</sub> H <sub>42</sub> NaO <sub>3</sub> S                             | 98.79 |           | 482.2874 | 482.2855  | 505.2747 | -3.95      | 3.95           | 99.51      | 98.55       | 97.65         | 10  |
| <input type="checkbox"/>            | C <sub>27</sub> H <sub>46</sub> O <sub>3</sub> S <sub>2</sub>                | C <sub>27</sub> H <sub>46</sub> NaO <sub>3</sub> S <sub>2</sub>                | 97.44 |           | 482.2874 | 482.2888  | 505.2781 | 3.03       | 3.03           | 99.71      | 94.43       | 96.52         | 5   |
| <input type="checkbox"/>            | C <sub>22</sub> H <sub>46</sub> N <sub>2</sub> O <sub>5</sub> S <sub>2</sub> | C <sub>22</sub> H <sub>46</sub> N <sub>2</sub> NaO <sub>5</sub> S <sub>2</sub> | 96.55 |           | 482.2874 | 482.2848  | 505.274  | -5.32      | 5.32           | 99.12      | 92.63       | 96.13         | 1   |

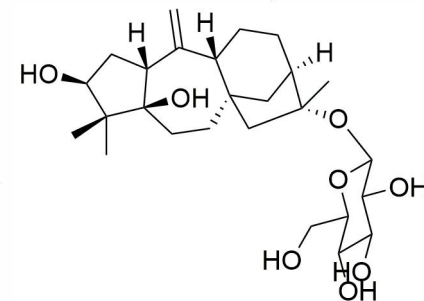

page 1

The HRESIMS spectrum of **10**

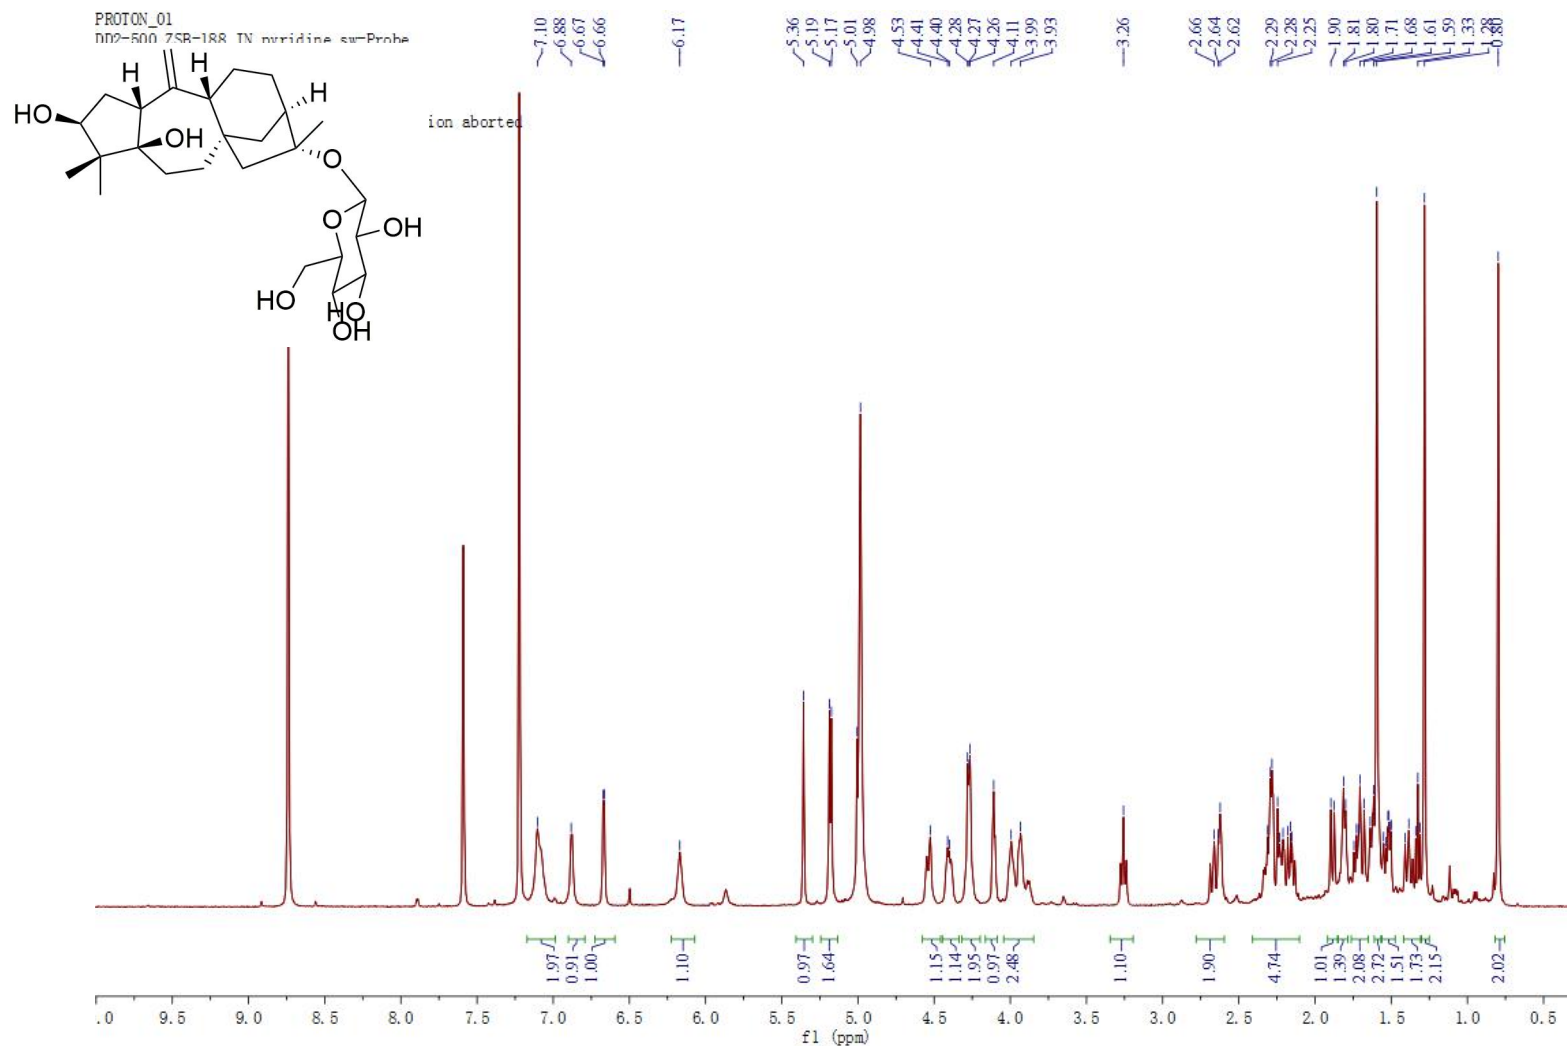

The  $^1\text{H}$  NMR spectrum of **10** in  $\text{C}_5\text{D}_5\text{N}$  (500 MHz)

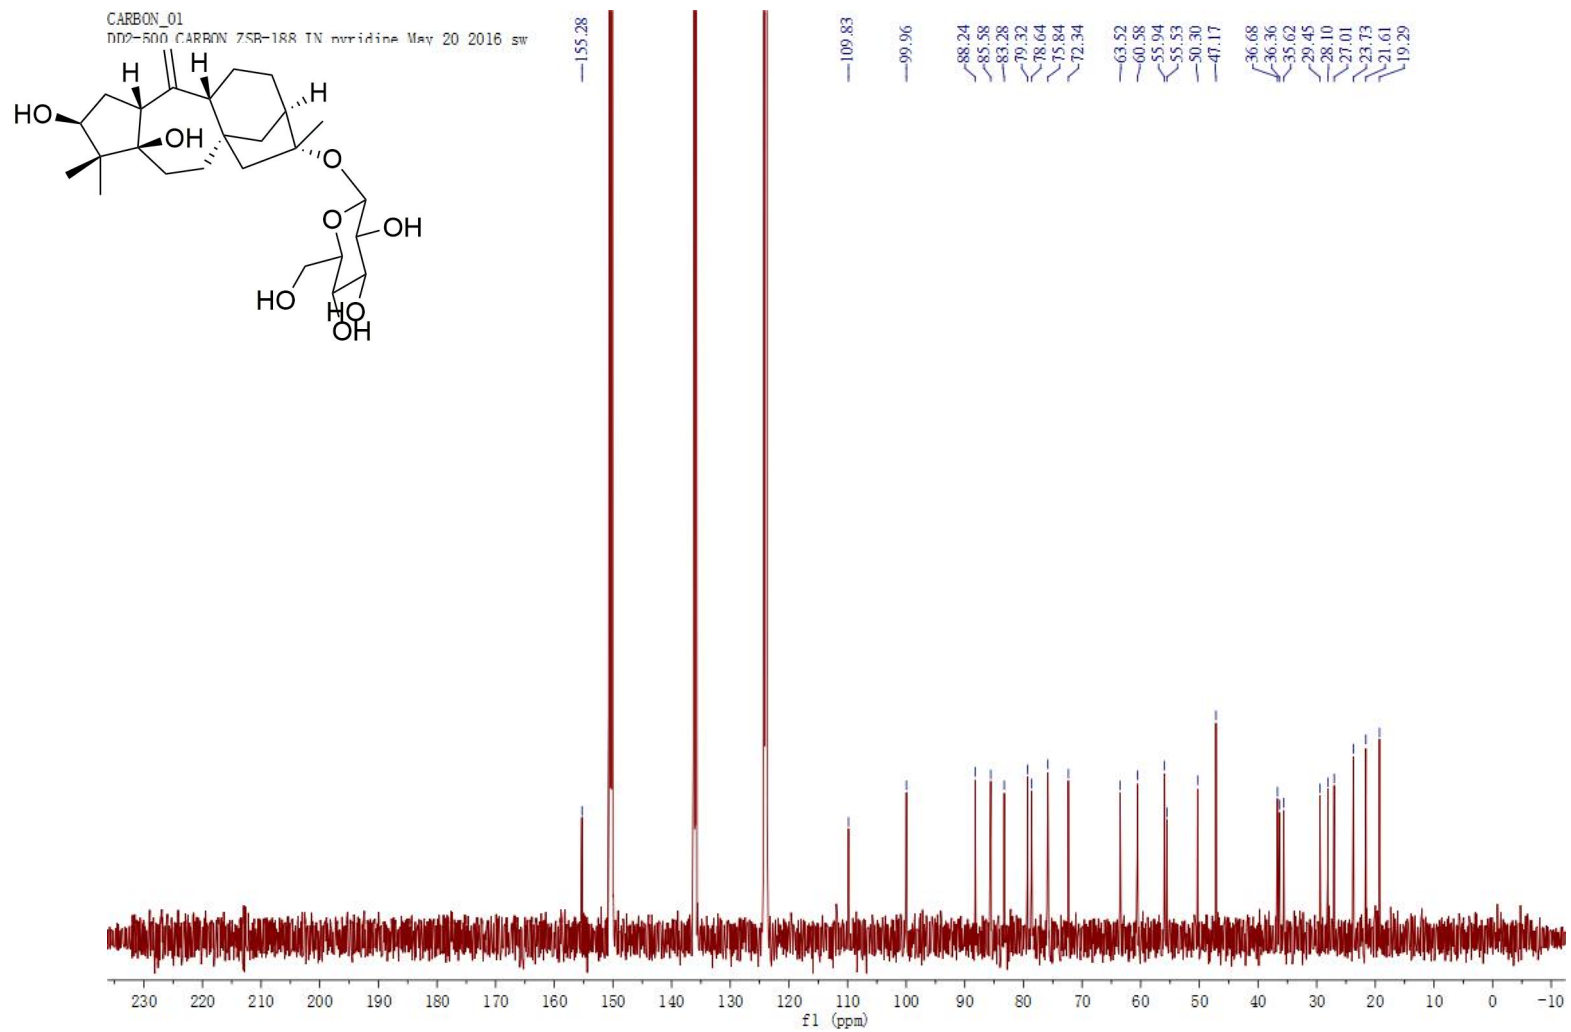



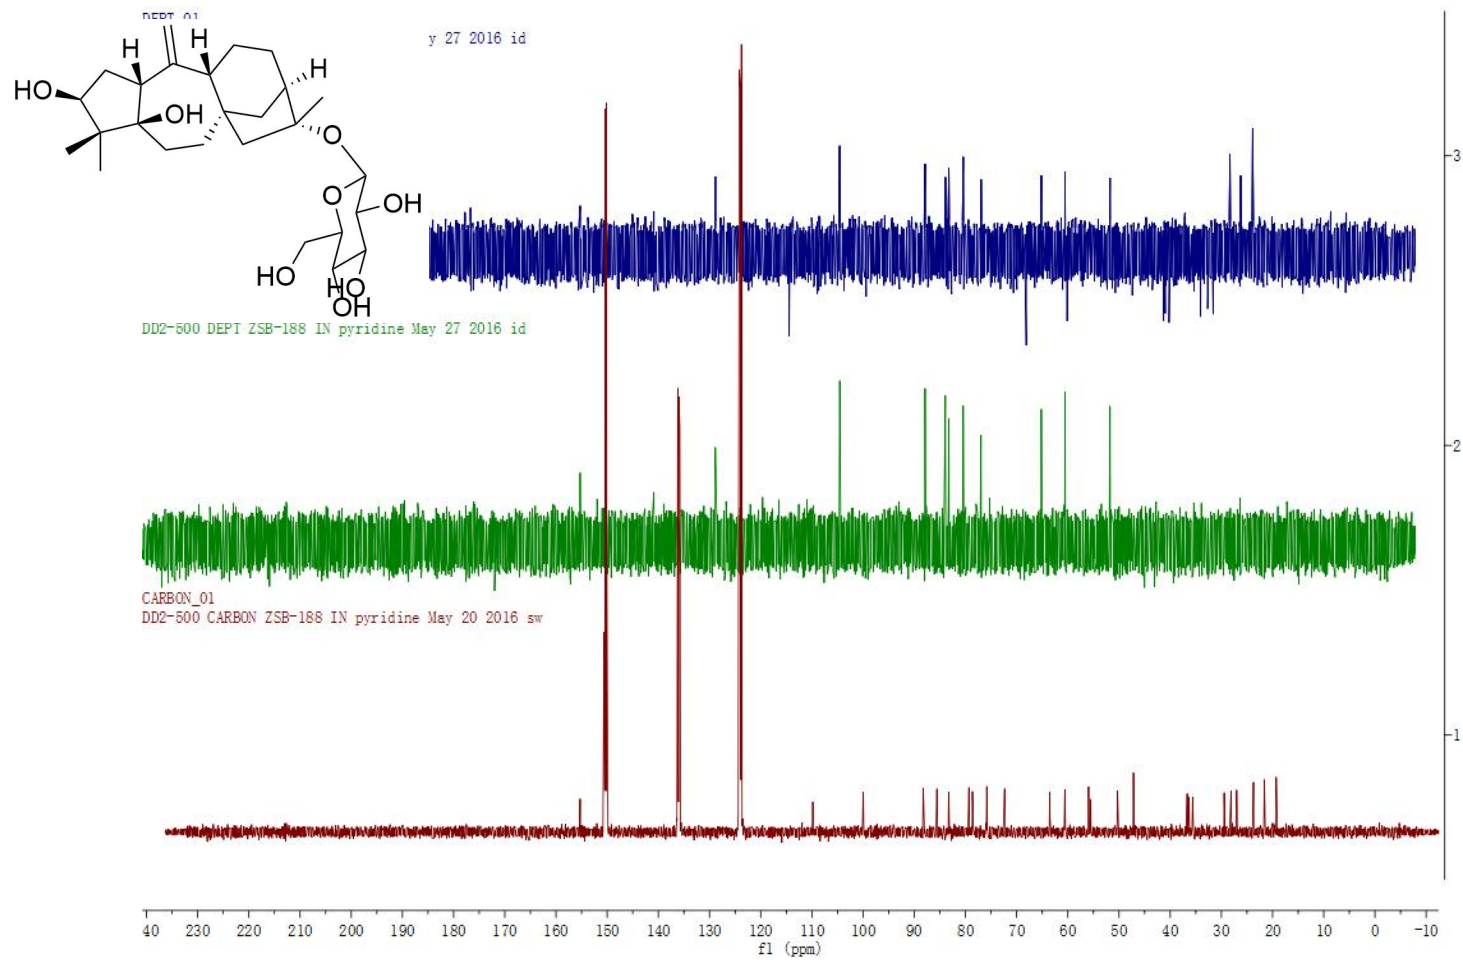

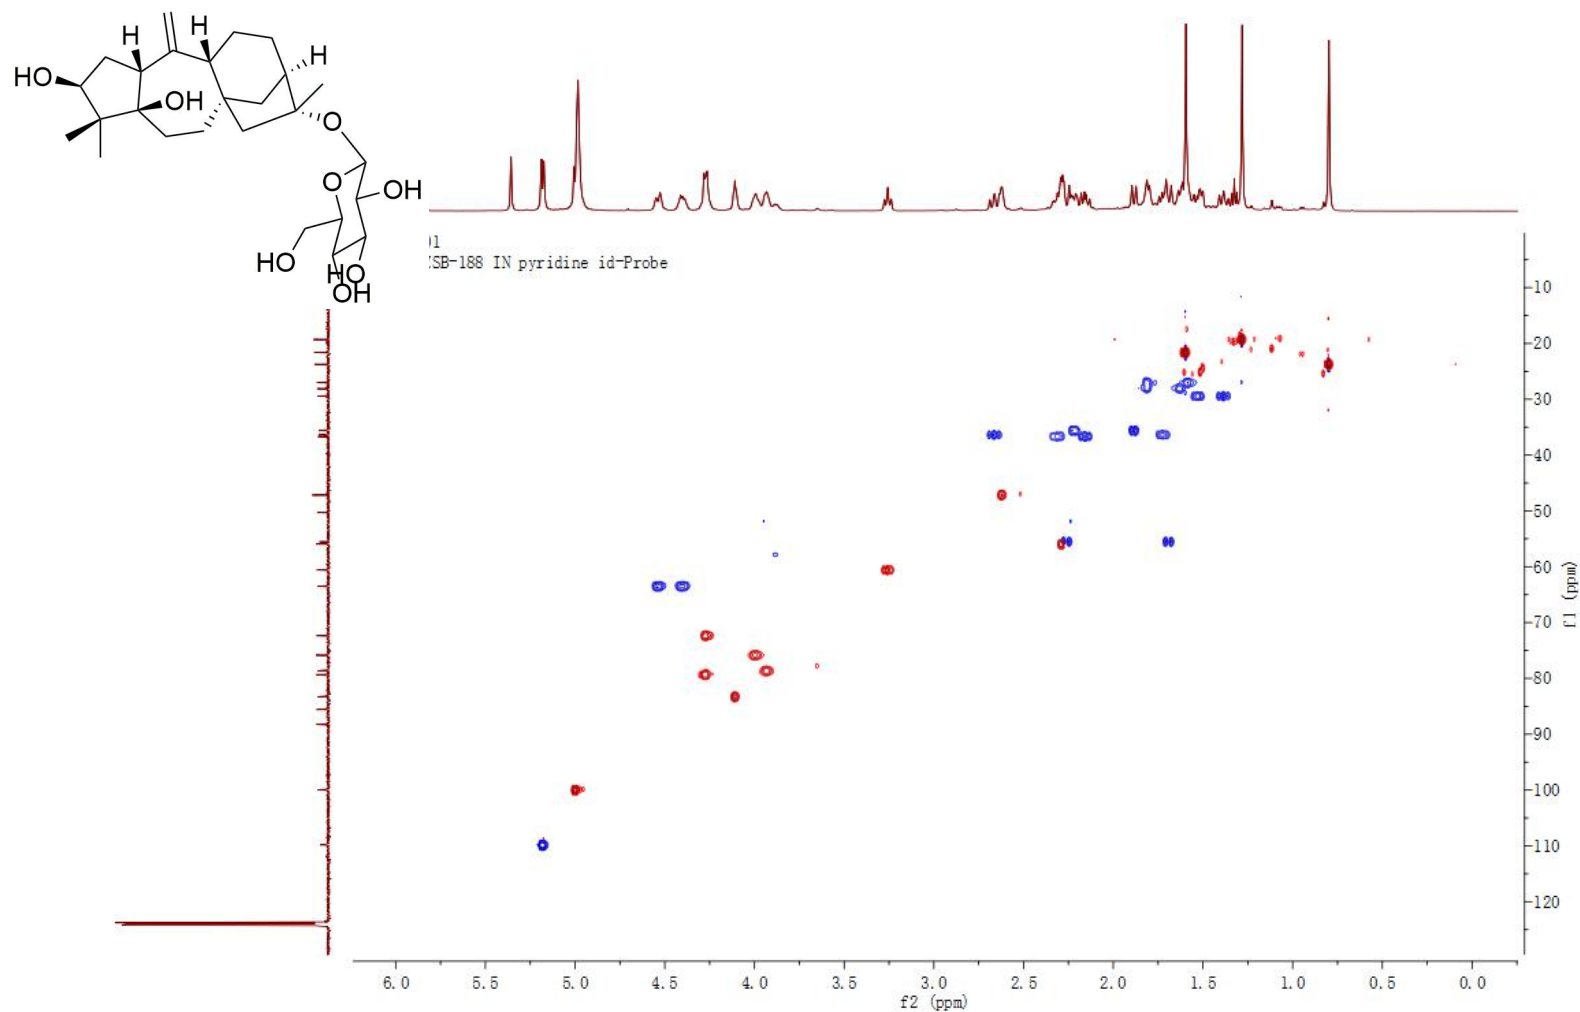

The COSY spectrum of **10** in C<sub>5</sub>D<sub>5</sub>N (500 MHz)

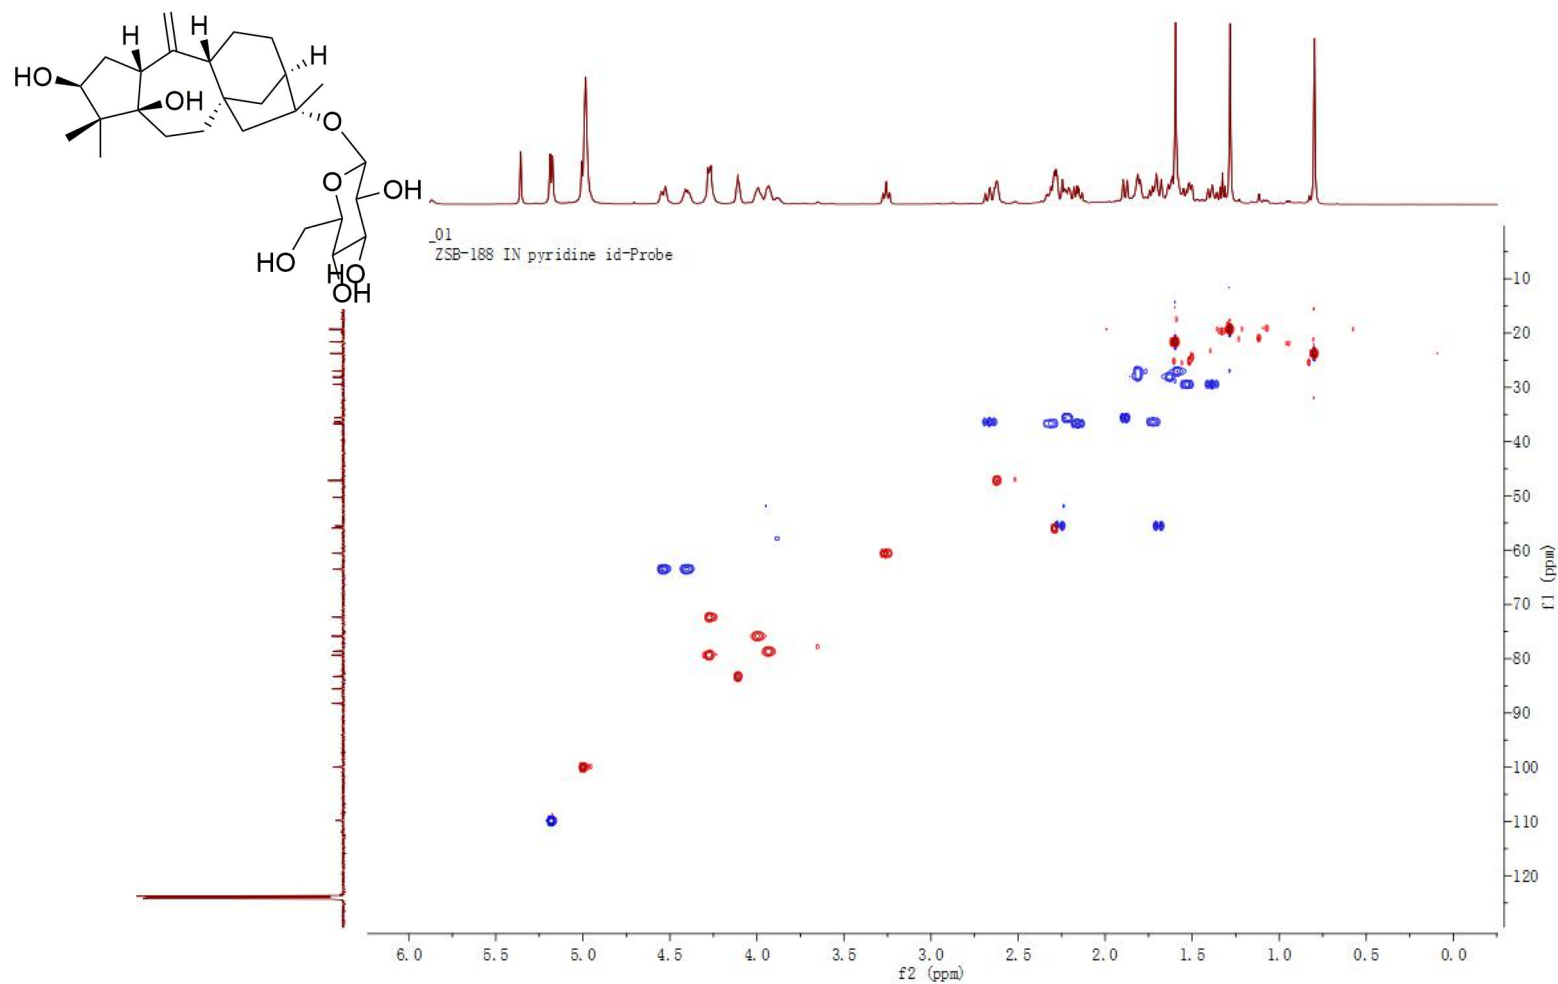

The HSQC spectrum of **10** in  $C_5D_5N$  ( $^1H$ : 500 MHz,  $^{13}C$ : 125 MHz)

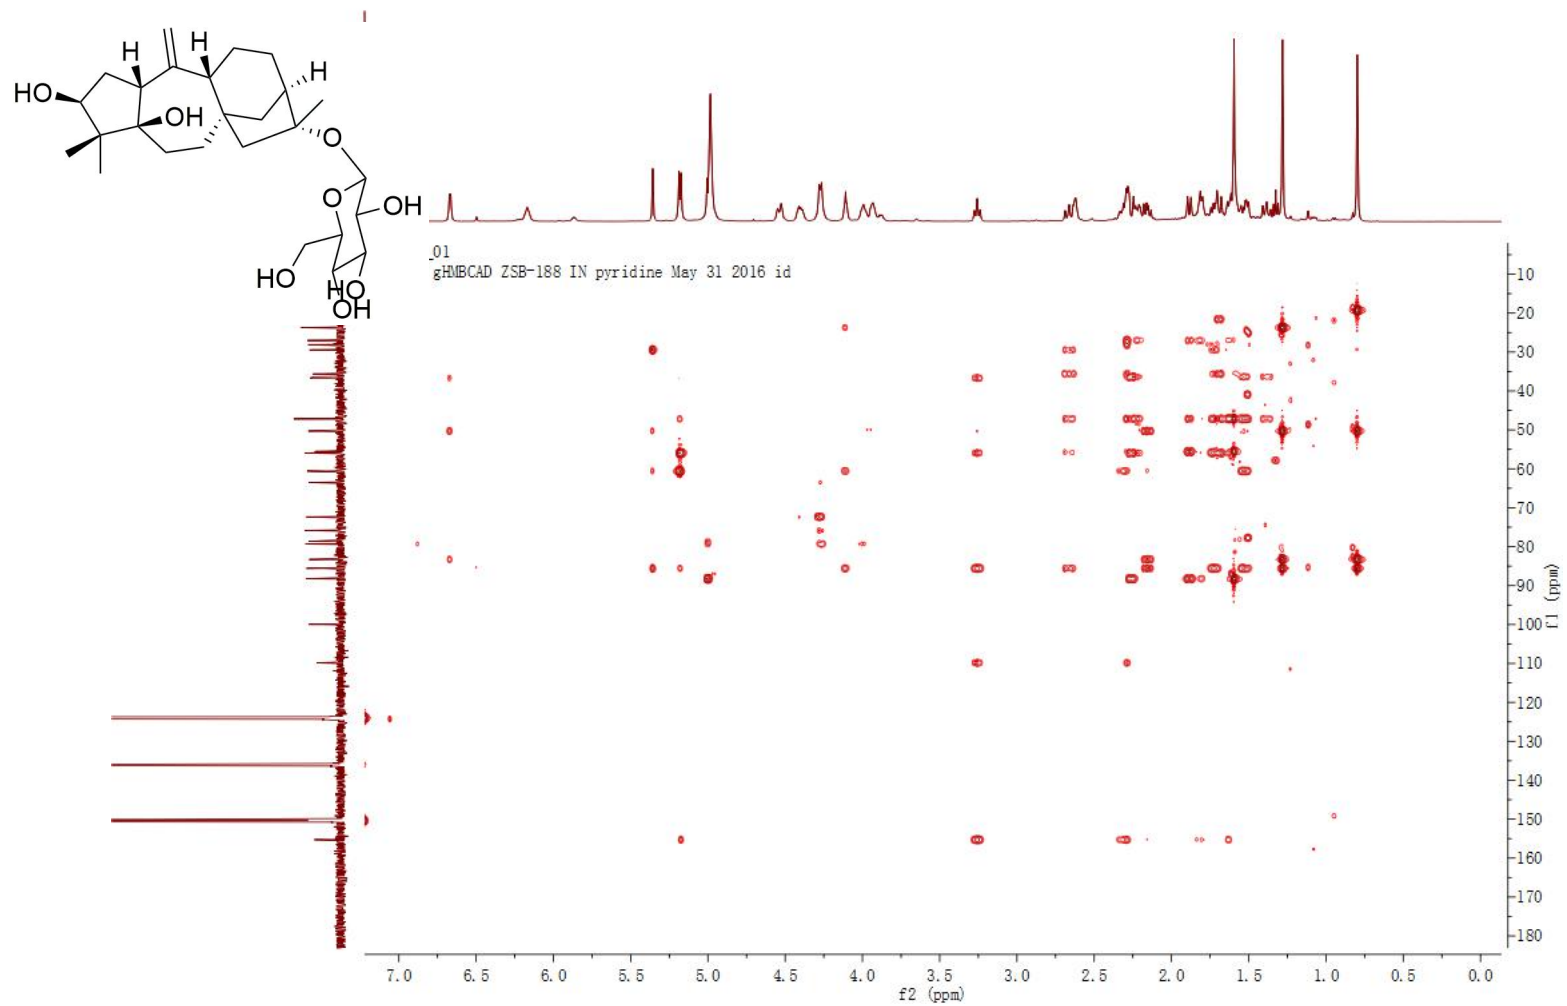

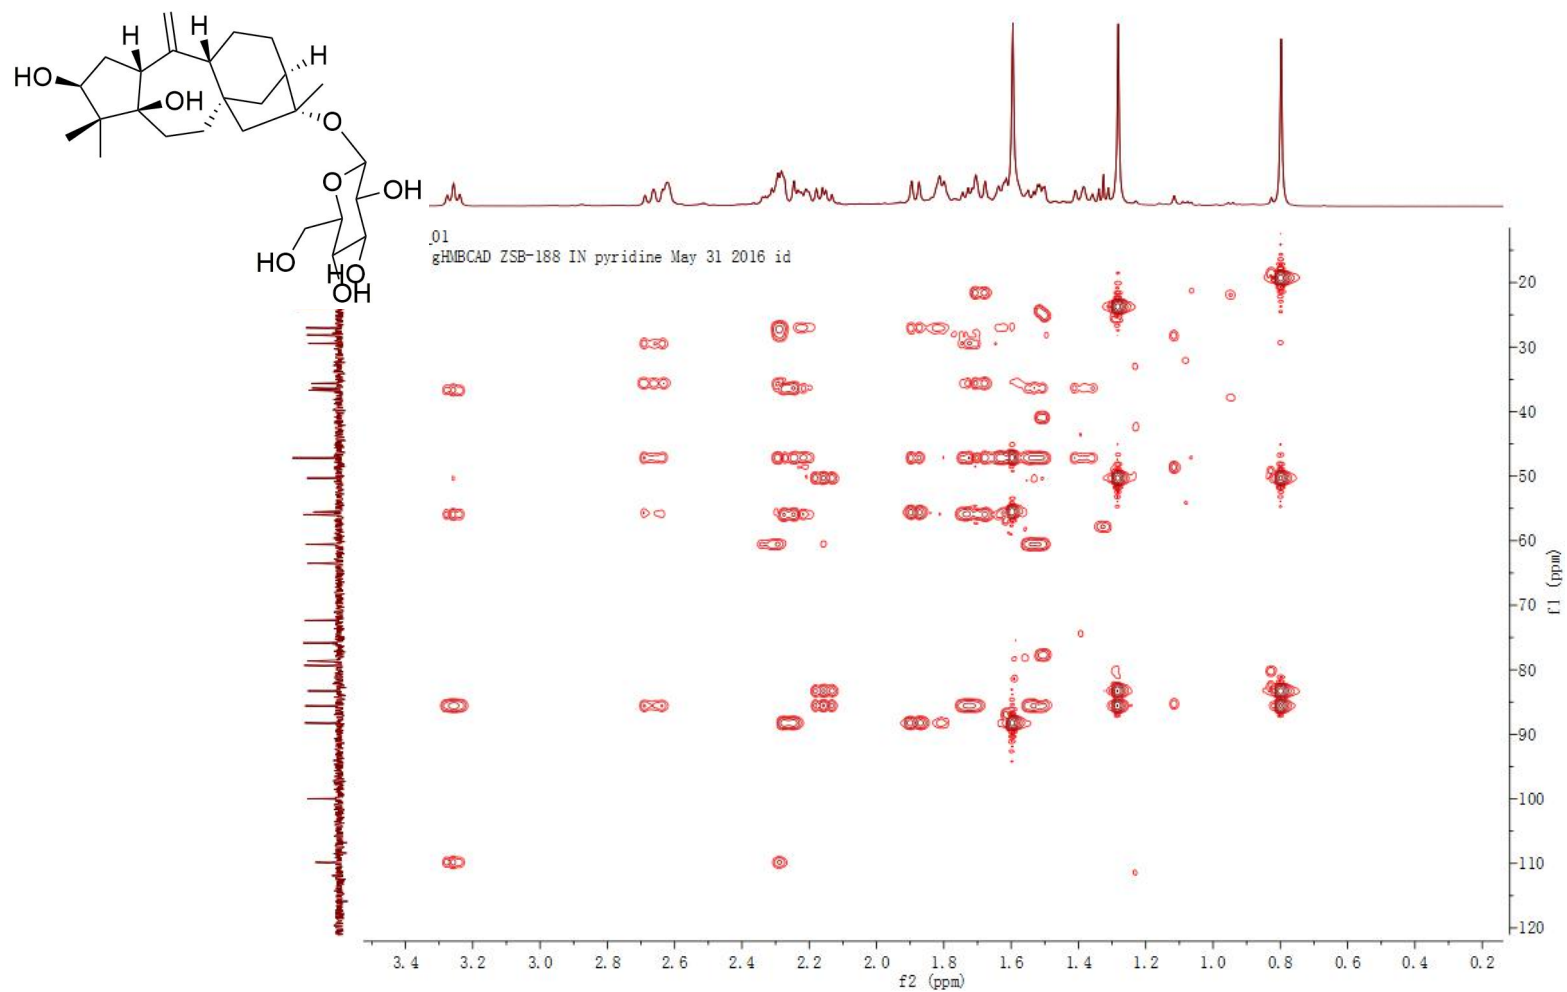

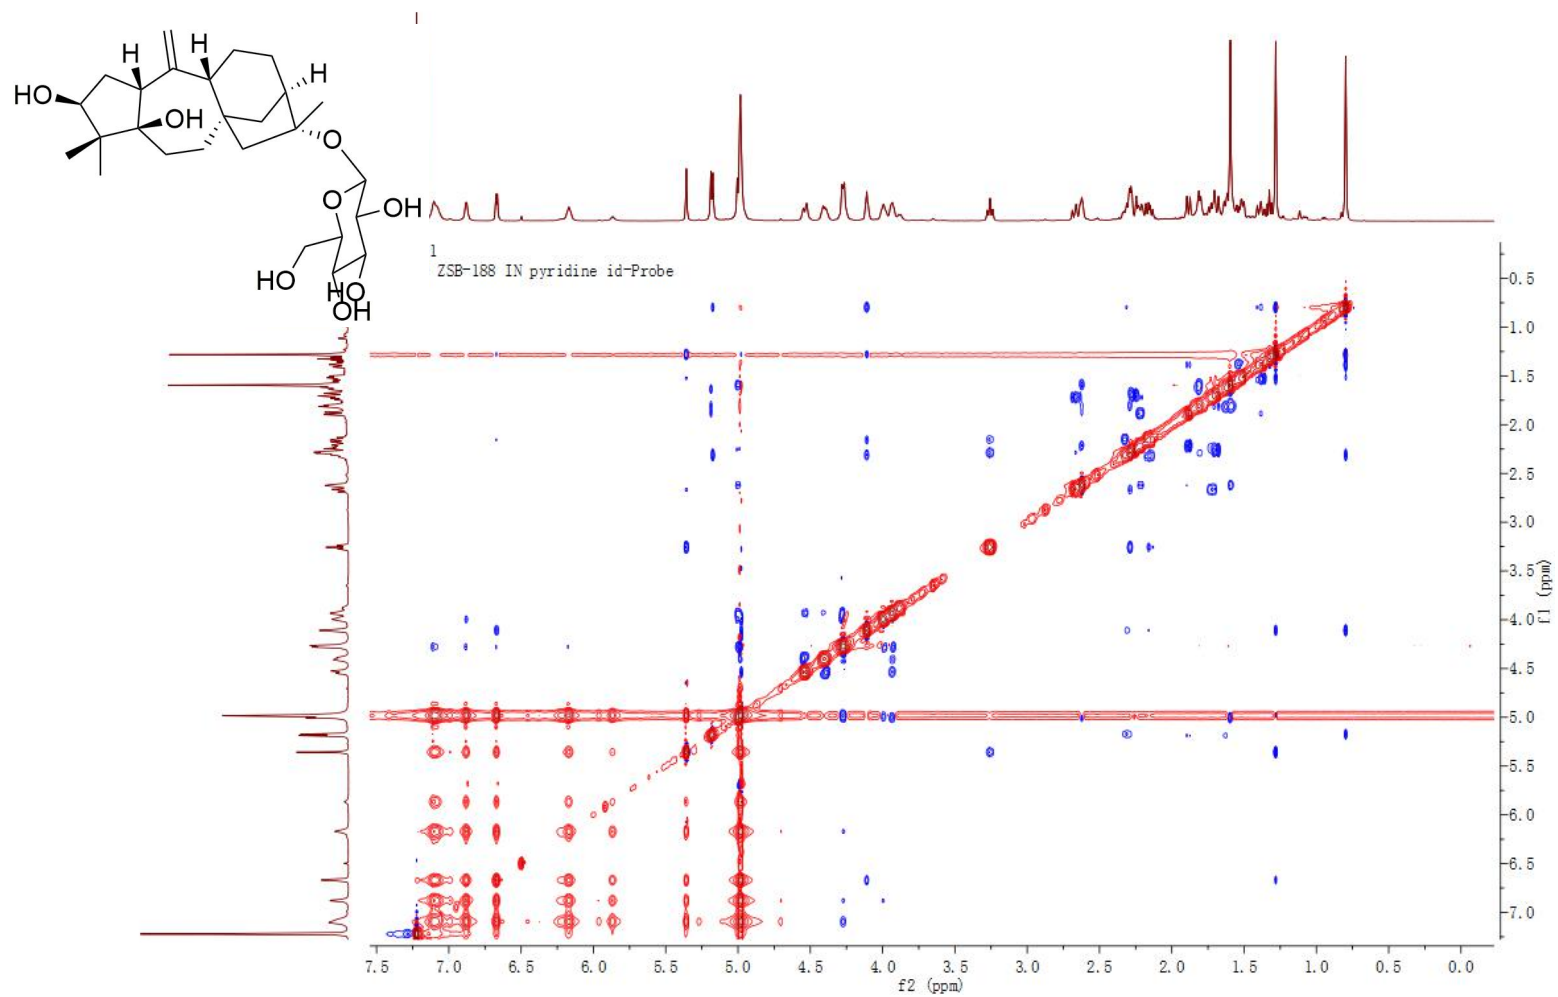

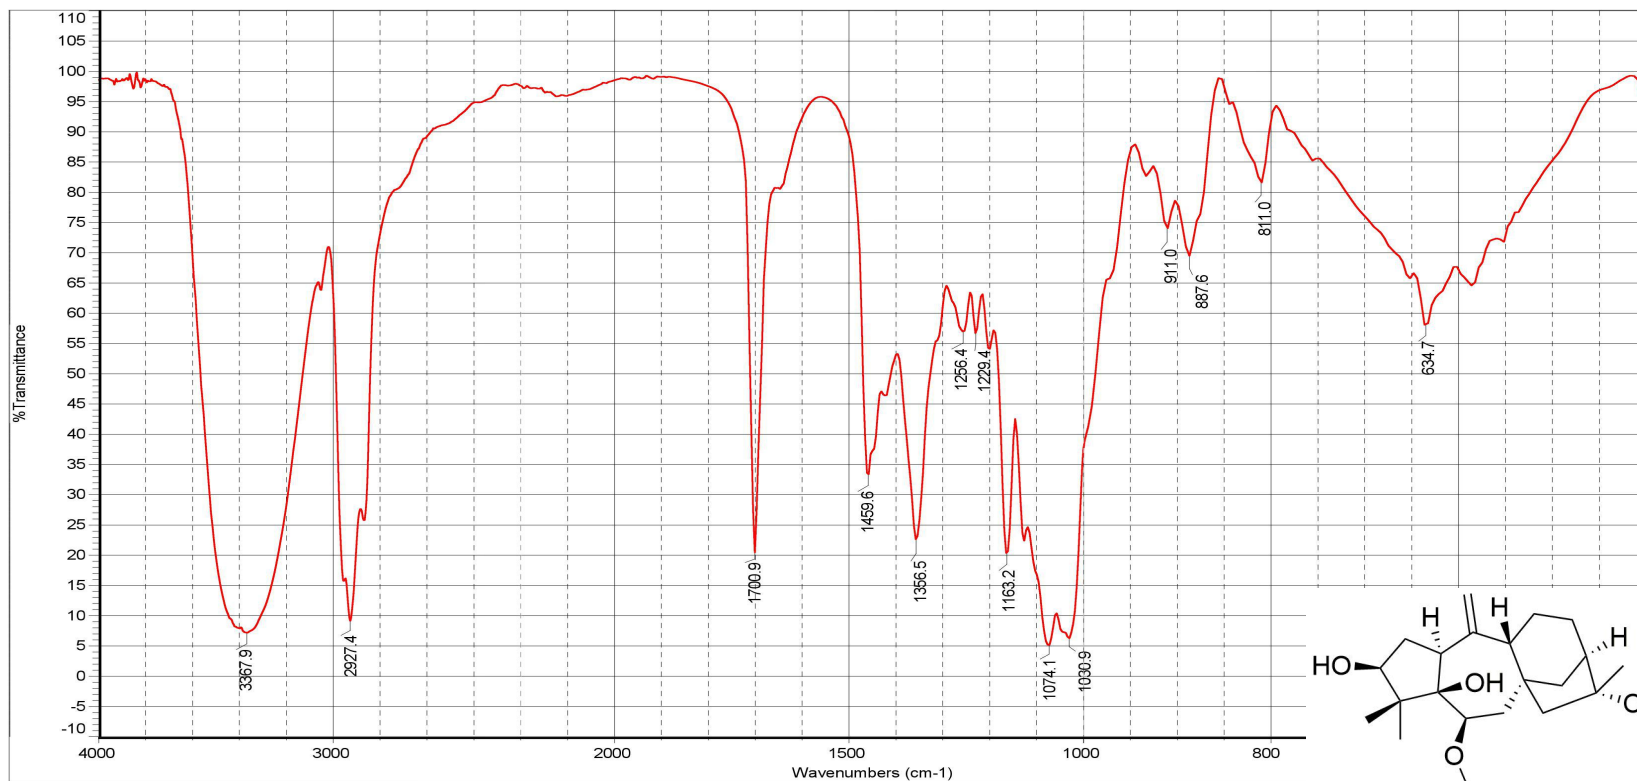

日期: 星期四 11月 03 13:36:04 2016 (GMT+08:00) Sample Name : ZSB - 114 (显微镜透射法 FT- IR Microscope Trans  
 扫描次数: 100 傅里叶变换红外显微镜(FT-IR Microscope): Centaurus  
 分辨率: 8.000 美国热电公司(Thermo)傅里叶变换红外光谱仪:Nicolet 5700

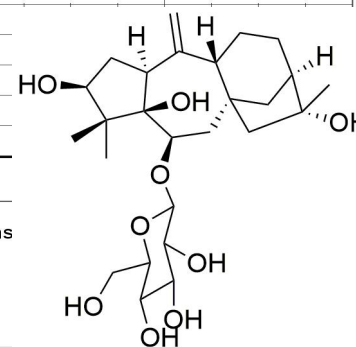

The IR spectrum of 11

MS Formula Results: + Scan (6.461 min) Sub (2015123103.d)

| m/z      | Ion                 | Formula                                          | Abundance |
|----------|---------------------|--------------------------------------------------|-----------|
| 521.2721 | (M+Na) <sup>+</sup> | C <sub>26</sub> H <sub>42</sub> NaO <sub>9</sub> | 2216676.5 |

  

| Best                                | Formula (M)                                                   | Ion Formula                                                     | Score | Cross Sco | Mass     | Calc Mass | Calc m/z | Diff (ppm) | Abs Diff (ppm) | Mass Match | Abund Match | Spacing Match | DBE |
|-------------------------------------|---------------------------------------------------------------|-----------------------------------------------------------------|-------|-----------|----------|-----------|----------|------------|----------------|------------|-------------|---------------|-----|
| <input checked="" type="checkbox"/> | C <sub>26</sub> H <sub>42</sub> O <sub>9</sub>                | C <sub>26</sub> H <sub>42</sub> NaO <sub>9</sub>                | 98.03 |           | 498.2829 | 498.2829  | 521.2721 | -0.06      | 0.06           | 100        | 93.15       | 99.95         | 6   |
| <input type="checkbox"/>            | C <sub>27</sub> H <sub>38</sub> N <sub>4</sub> O <sub>5</sub> | C <sub>27</sub> H <sub>38</sub> N <sub>4</sub> NaO <sub>5</sub> | 96.87 |           | 498.2829 | 498.2842  | 521.2734 | 2.62       | 2.62           | 99.78      | 89.47       | 99.93         | 11  |
| <input type="checkbox"/>            | C <sub>27</sub> H <sub>46</sub> O <sub>4</sub> S <sub>2</sub> | C <sub>27</sub> H <sub>46</sub> NaO <sub>4</sub> S <sub>2</sub> | 95.6  |           | 498.2829 | 498.2838  | 521.273  | 1.68       | 1.68           | 99.91      | 84.93       | 99.78         | 5   |
| <input type="checkbox"/>            | C <sub>30</sub> H <sub>42</sub> O <sub>4</sub> S              | C <sub>30</sub> H <sub>42</sub> NaO <sub>4</sub> S              | 95.39 |           | 498.2829 | 498.2804  | 521.2696 | -5.09      | 5.09           | 99.19      | 85.26       | 99.94         | 10  |
| <input type="checkbox"/>            | C <sub>28</sub> H <sub>42</sub> N <sub>4</sub> S <sub>2</sub> | C <sub>28</sub> H <sub>42</sub> N <sub>4</sub> NaS <sub>2</sub> | 94.67 |           | 498.2829 | 498.2851  | 521.2743 | 4.36       | 4.36           | 99.4       | 82.54       | 99.74         | 10  |
| <input type="checkbox"/>            | C <sub>31</sub> H <sub>38</sub> N <sub>4</sub> S              | C <sub>31</sub> H <sub>38</sub> N <sub>4</sub> NaS              | 94.64 |           | 498.2829 | 498.2817  | 521.2709 | -2.41      | 2.41           | 99.82      | 81.62       | 99.91         | 15  |

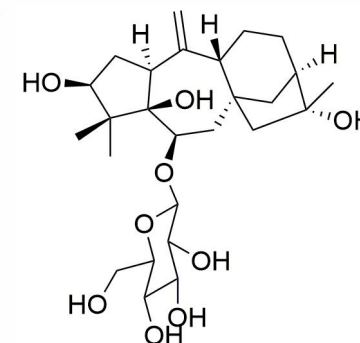

page 1

The HRESIMS spectrum of **11**



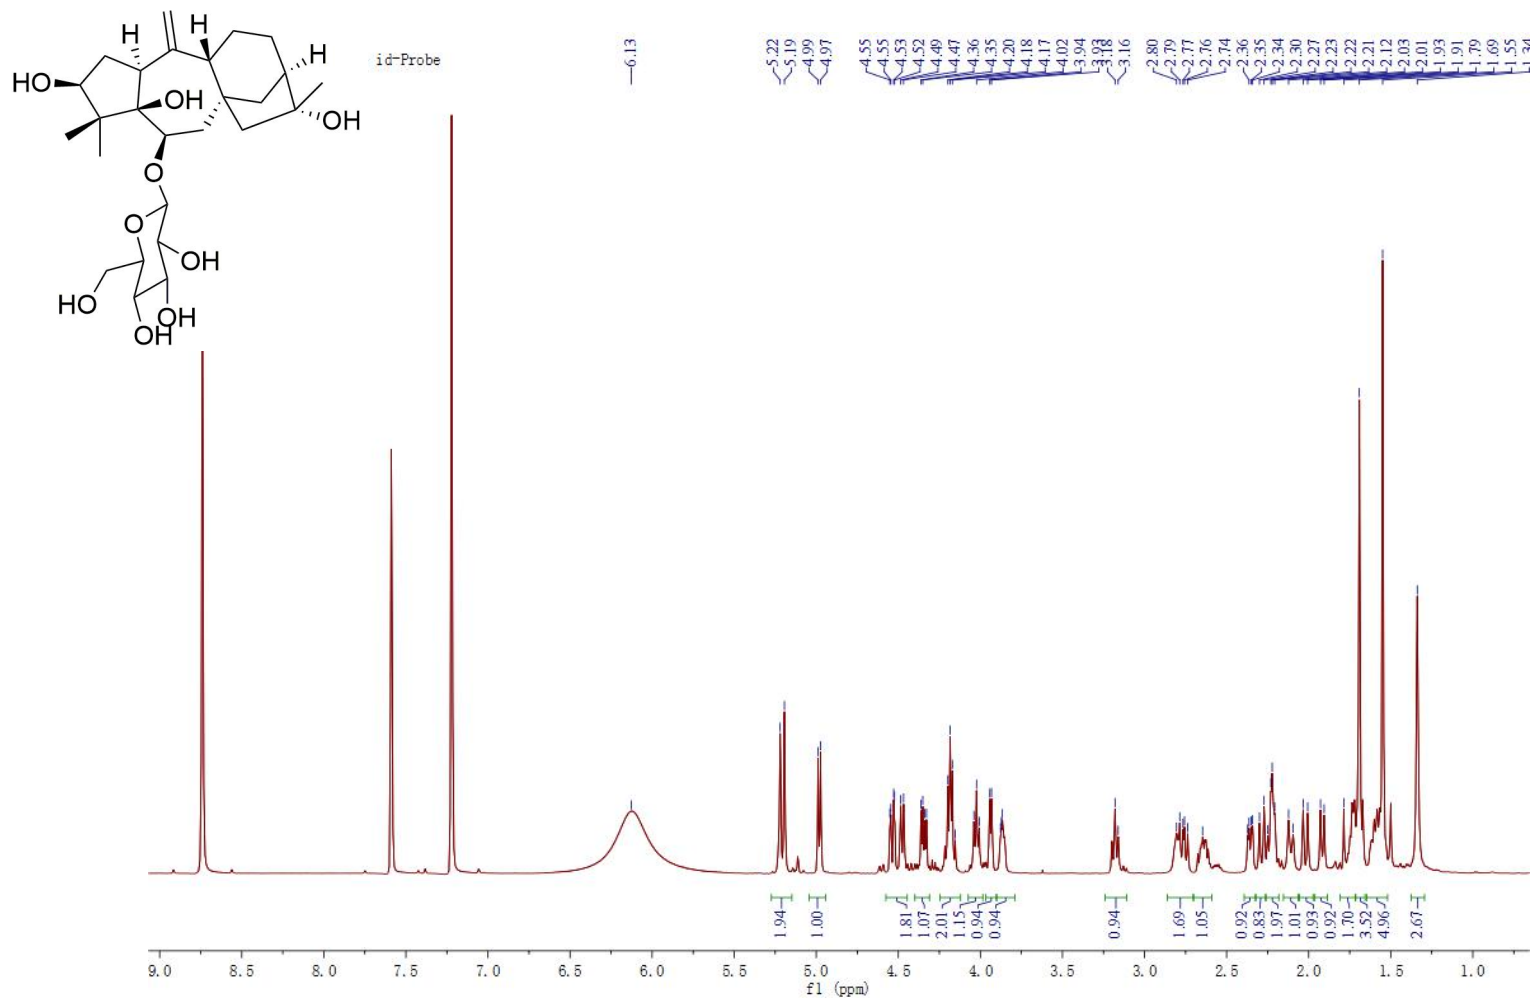

The  $^1\text{H}$  NMR spectrum of **11** in  $\text{C}_5\text{D}_5\text{N}$  (500 MHz)

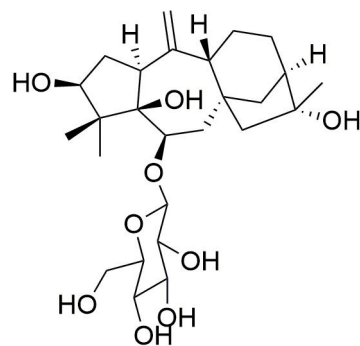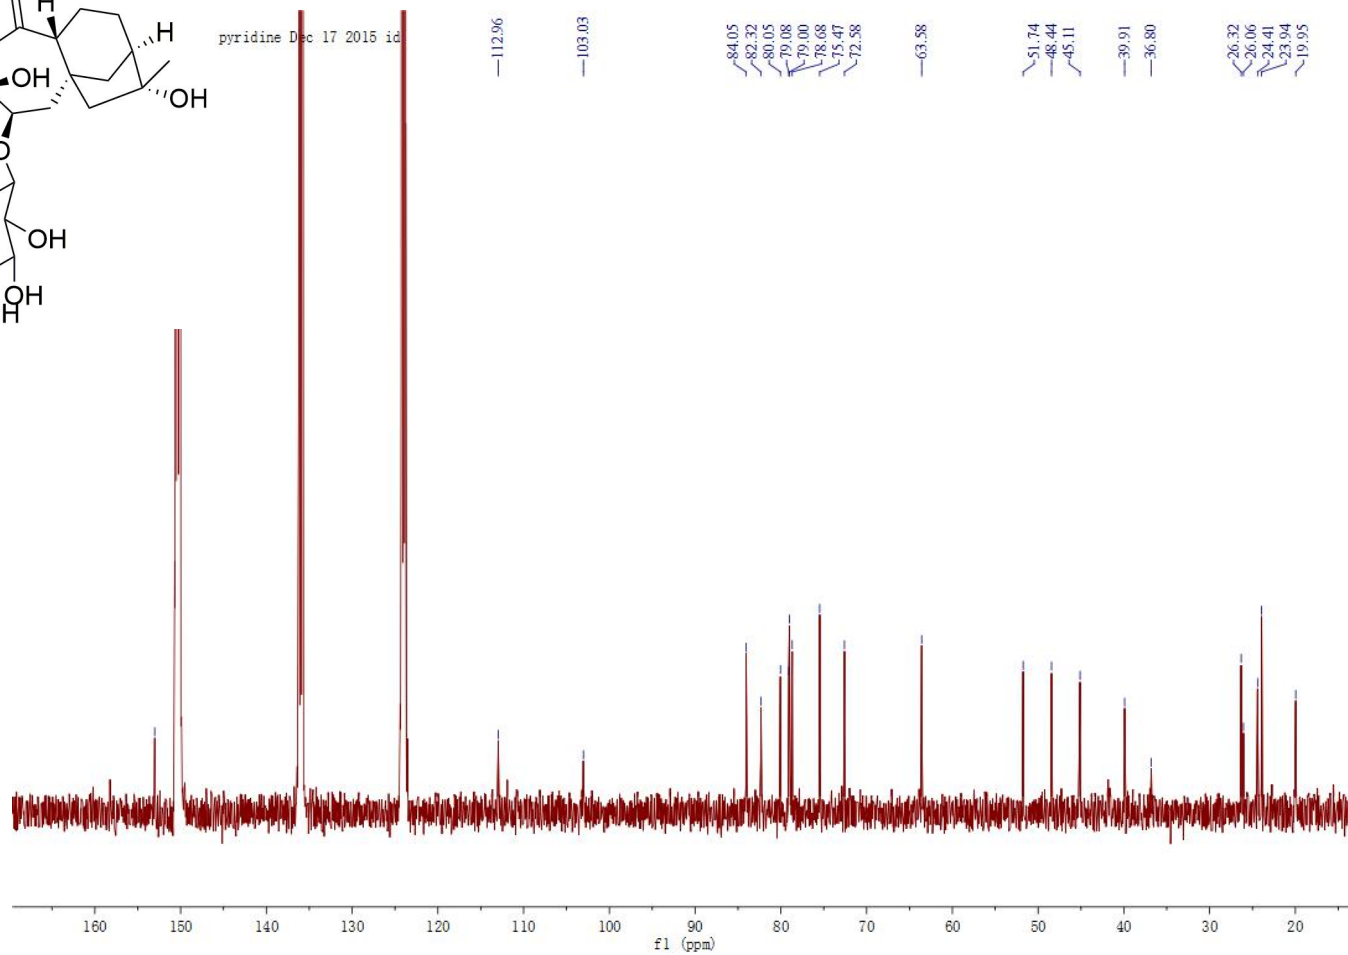

The  $^{13}\text{C}$  NMR spectrum of **11** in  $\text{C}_5\text{D}_5\text{N}$  (125 MHz)

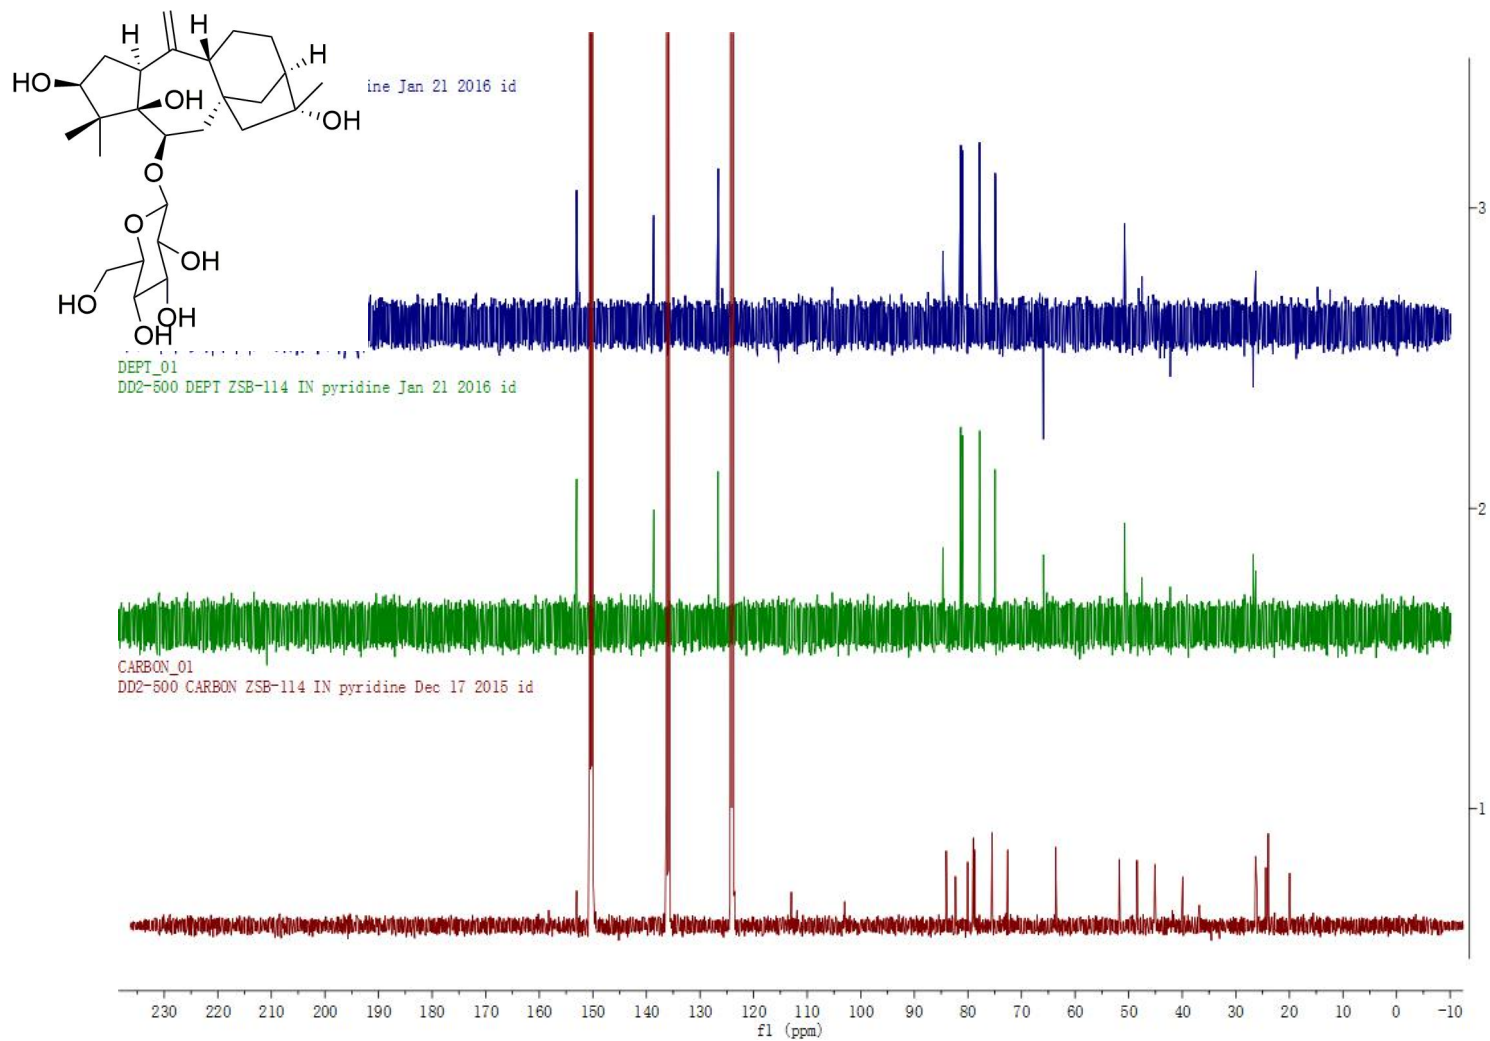

The DEPT spectrum of **11** in  $C_5D_5N$  (125 MHz)

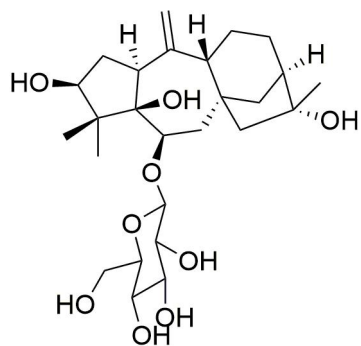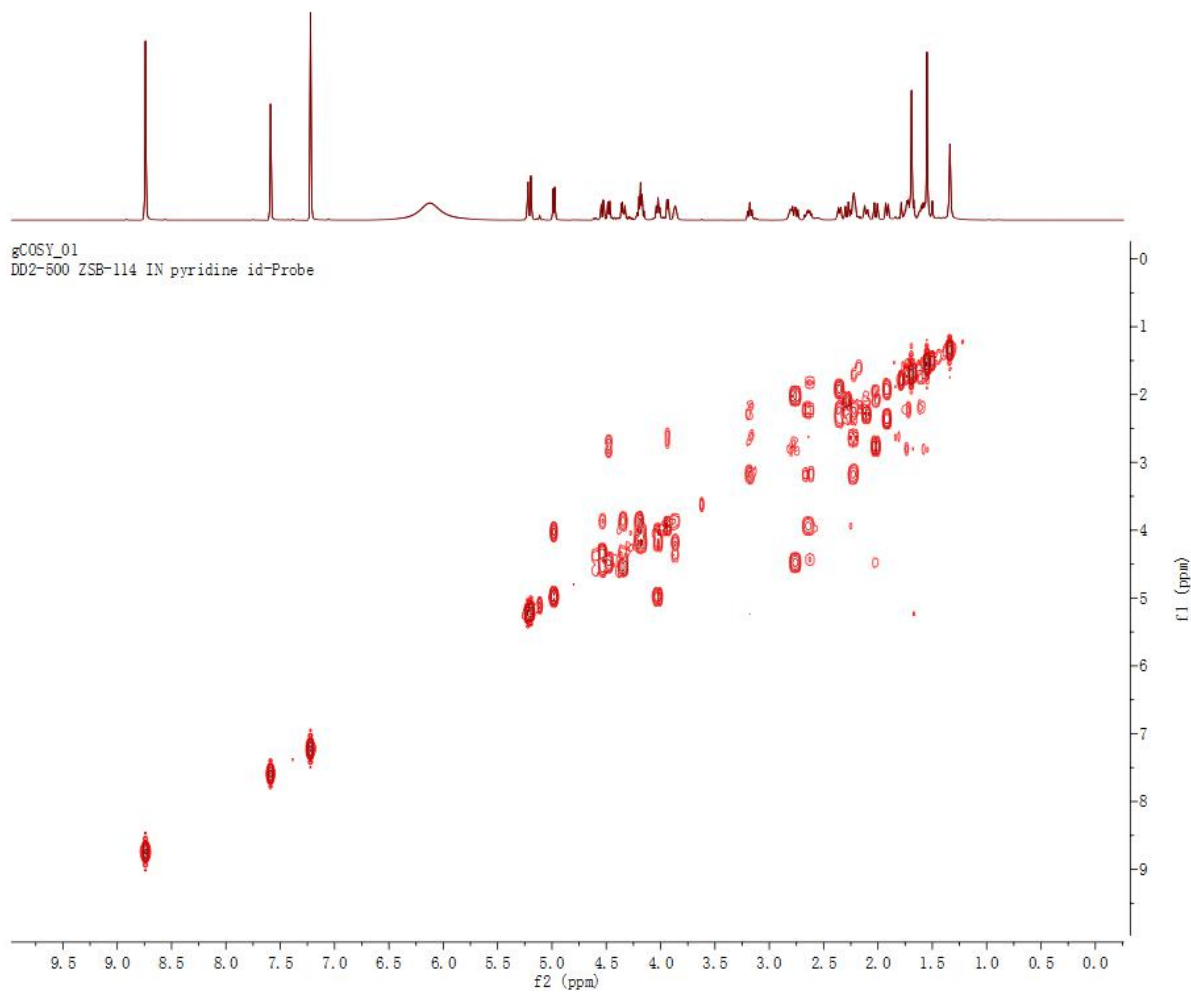

The COSY spectrum of **11** in C<sub>5</sub>D<sub>5</sub>N (500 MHz)

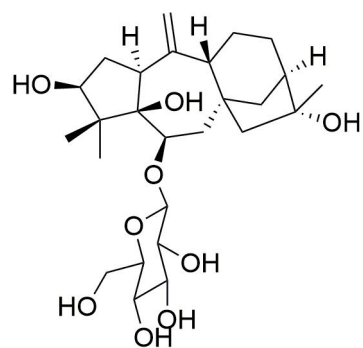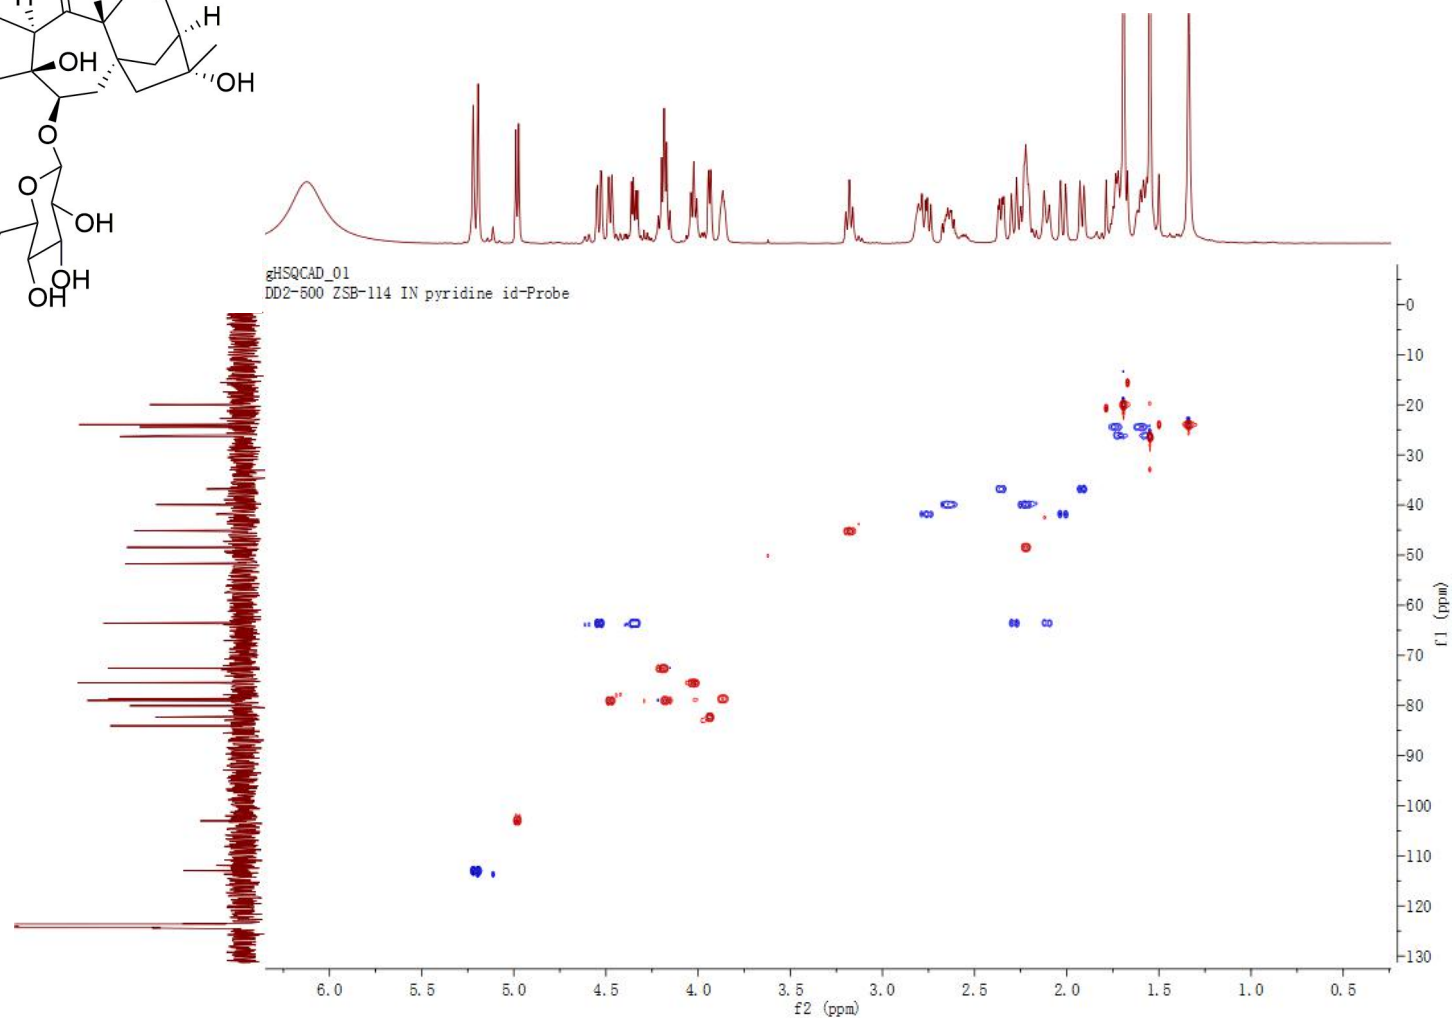

The HSQC spectrum of **11** in  $C_5D_5N$  ( $^1H$ : 500 MHz,  $^{13}C$ : 125 MHz)

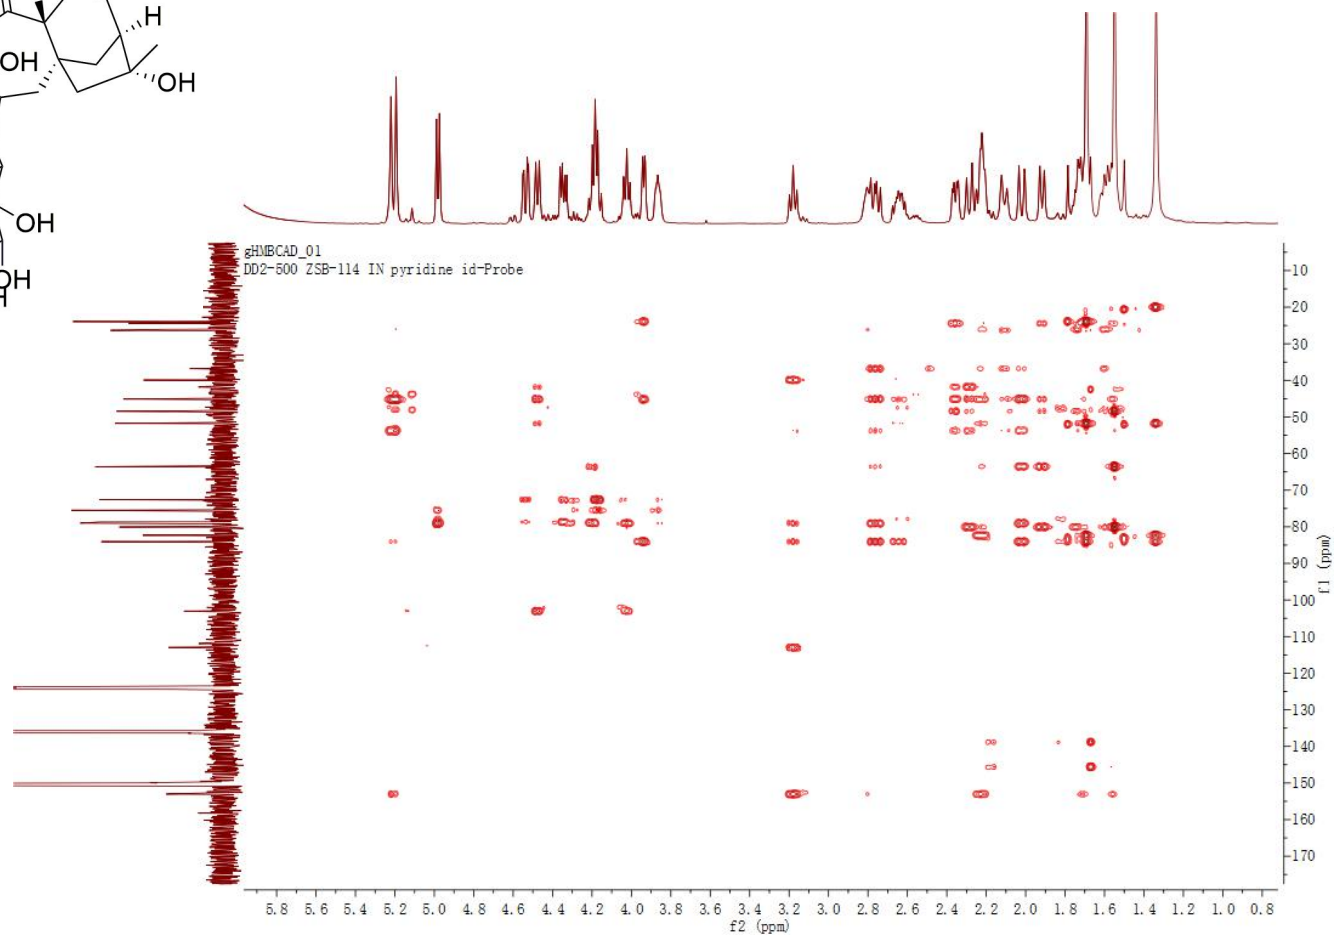

The HMBC spectrum of **11** in C<sub>5</sub>D<sub>5</sub>N (<sup>1</sup>H: 500 MHz, <sup>13</sup>C: 125 MHz)

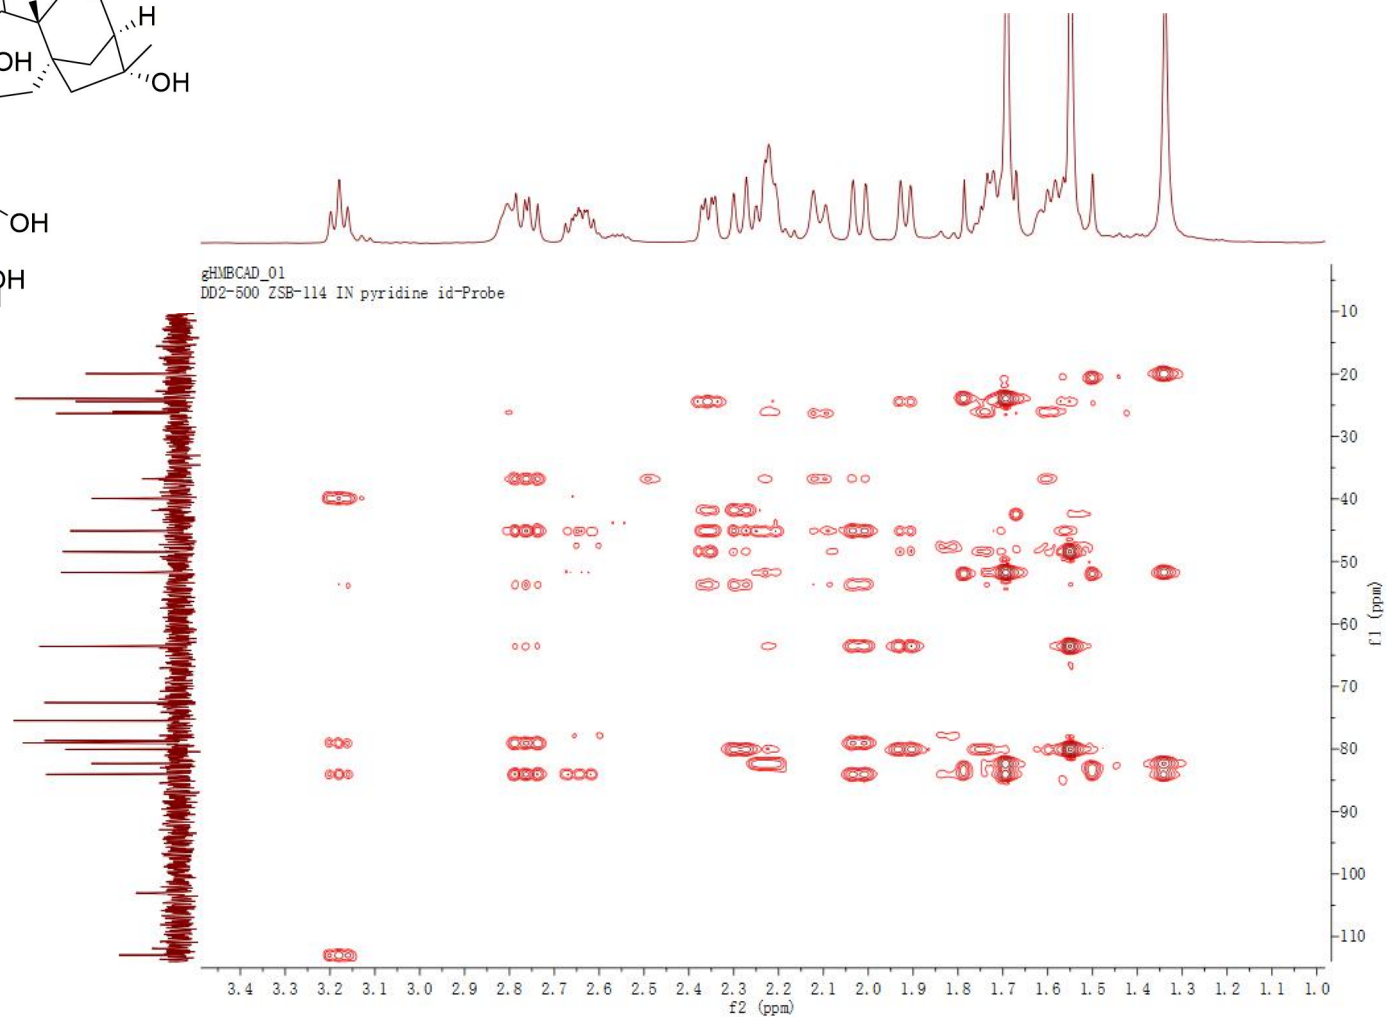

The HMBC spectrum (amplified) of **11** in  $C_5D_5N$  ( $^1H$ : 500 MHz,  $^{13}C$ : 125 MHz)

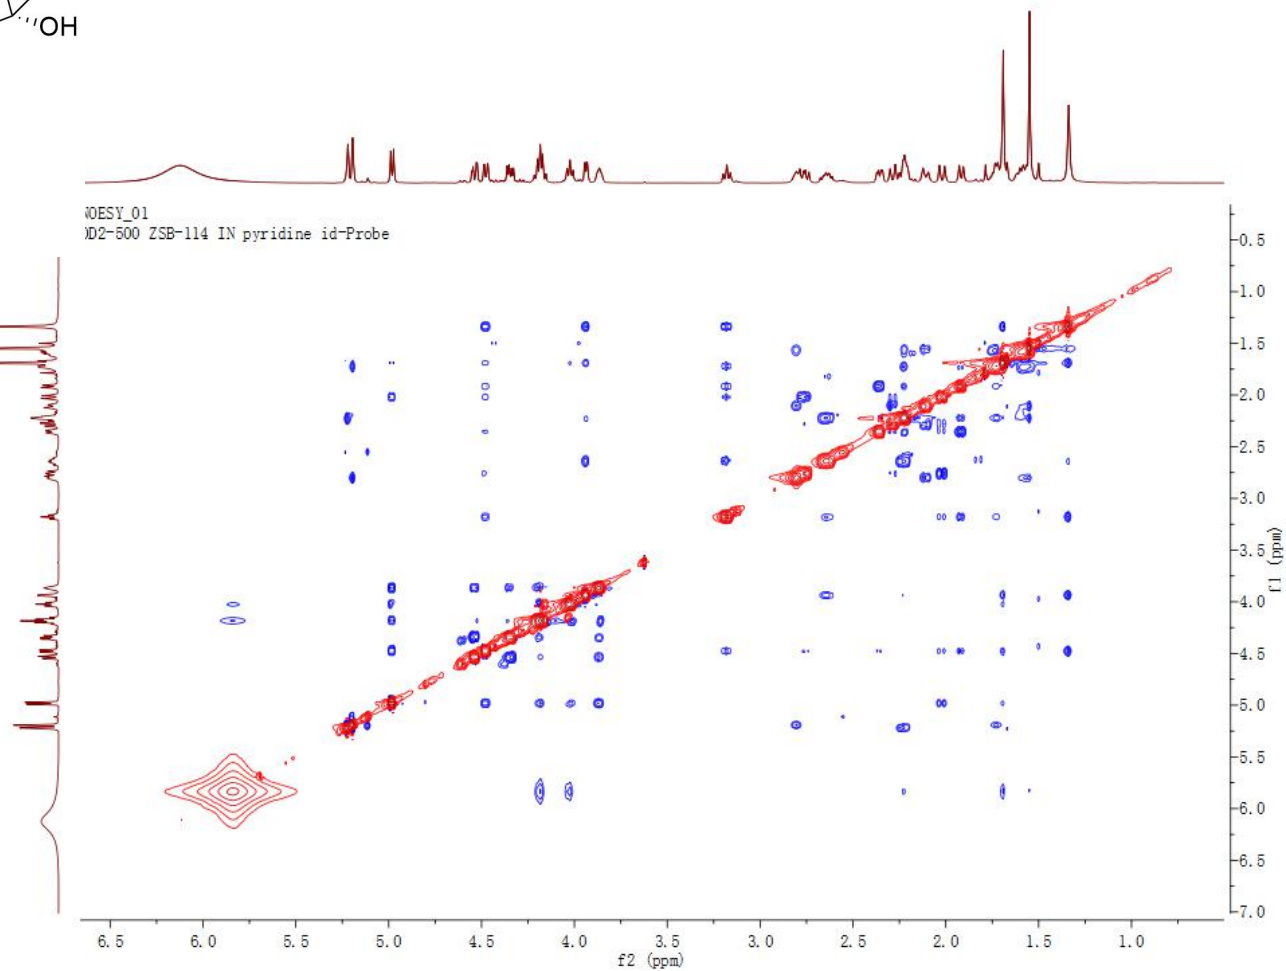

The NOESY spectrum of **11** in C<sub>5</sub>D<sub>5</sub>N (500 MHz)



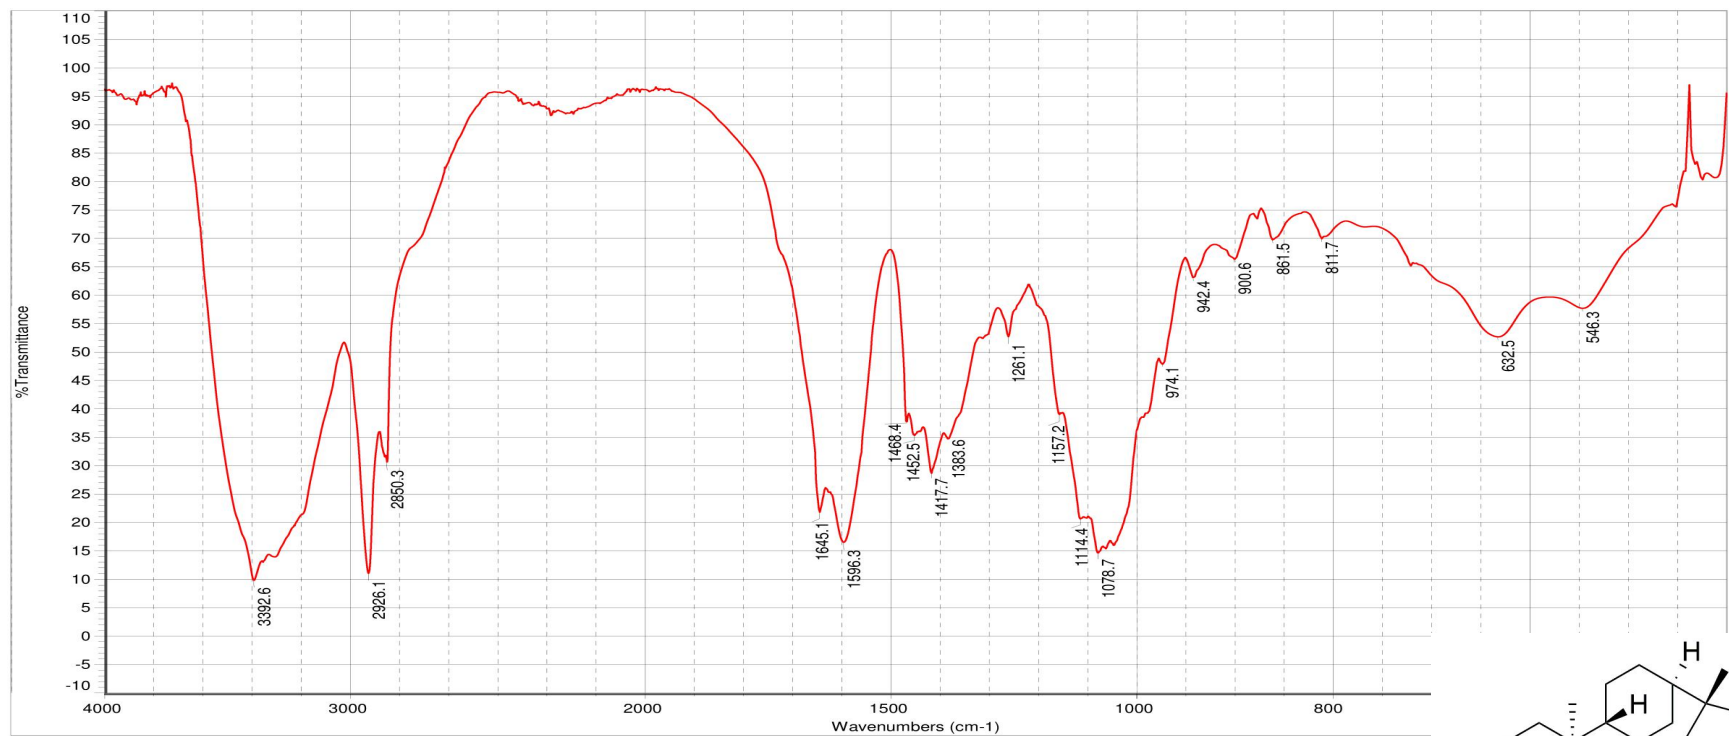

日期: 星期三 12月 26 12:08:30 2018 (GMT+08:00) Sample Name : ZSB - 161

(显微镜透射法 FT- IR Microscope Transmis

扫描次数: 64

傅里叶变换红外显微镜 (FT-IR Microscope): Centaurus

分辨率: 4.000

美国热电公司 (Thermo) 傅里叶变换红外光谱仪: Nicolet 5700

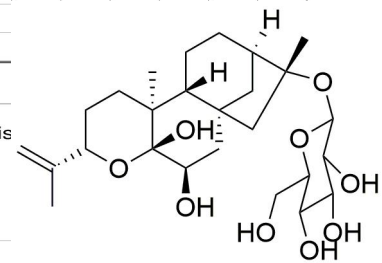

The IR spectrum of 12

MS Formula Results: + Scan (7.390 min) Sub (2016050404.d)

| m/z      | Ion                 | Formula                                          | Abundance |
|----------|---------------------|--------------------------------------------------|-----------|
| 521.2708 | (M+Na) <sup>+</sup> | C <sub>26</sub> H <sub>42</sub> NaO <sub>9</sub> | 469797.6  |

  

| Best                                | Formula (M)                                                                  | Ion Formula                                                                    | Score | Cross Sco | Mass     | Calc Mass | Calc m/z | Diff (ppm) | Abs Diff (ppm) | Mass Match | Abund Match | Spacing Match | DBE |
|-------------------------------------|------------------------------------------------------------------------------|--------------------------------------------------------------------------------|-------|-----------|----------|-----------|----------|------------|----------------|------------|-------------|---------------|-----|
| <input checked="" type="checkbox"/> | C <sub>26</sub> H <sub>42</sub> O <sub>9</sub>                               | C <sub>26</sub> H <sub>42</sub> NaO <sub>9</sub>                               | 99.83 |           | 498.2816 | 498.2829  | 521.2721 | 2.56       | 2.56           | 99.79      | 99.89       | 99.83         | 6   |
| <input type="checkbox"/>            | C <sub>21</sub> H <sub>42</sub> N <sub>2</sub> O <sub>11</sub>               | C <sub>21</sub> H <sub>42</sub> N <sub>2</sub> NaO <sub>11</sub>               | 99.17 |           | 498.2816 | 498.2789  | 521.2681 | -5.52      | 5.52           | 99.04      | 98.79       | 99.89         | 2   |
| <input type="checkbox"/>            | C <sub>30</sub> H <sub>42</sub> O <sub>4</sub> S                             | C <sub>30</sub> H <sub>42</sub> NaO <sub>4</sub> S                             | 98.98 |           | 498.2816 | 498.2804  | 521.2696 | -2.47      | 2.47           | 99.81      | 96.78       | 99.96         | 10  |
| <input type="checkbox"/>            | C <sub>27</sub> H <sub>46</sub> O <sub>4</sub> S <sub>2</sub>                | C <sub>27</sub> H <sub>46</sub> NaO <sub>4</sub> S <sub>2</sub>                | 97.73 |           | 498.2816 | 498.2838  | 521.273  | 4.29       | 4.29           | 99.42      | 93.19       | 99.79         | 5   |
| <input type="checkbox"/>            | C <sub>22</sub> H <sub>46</sub> N <sub>2</sub> O <sub>6</sub> S <sub>2</sub> | C <sub>22</sub> H <sub>46</sub> N <sub>2</sub> NaO <sub>6</sub> S <sub>2</sub> | 97.66 |           | 498.2816 | 498.2797  | 521.2689 | -3.79      | 3.79           | 99.55      | 92.81       | 99.72         | 1   |

page 1

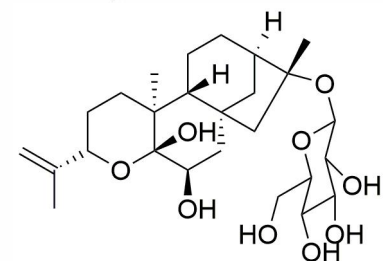

The HRESIMS spectrum of **12**

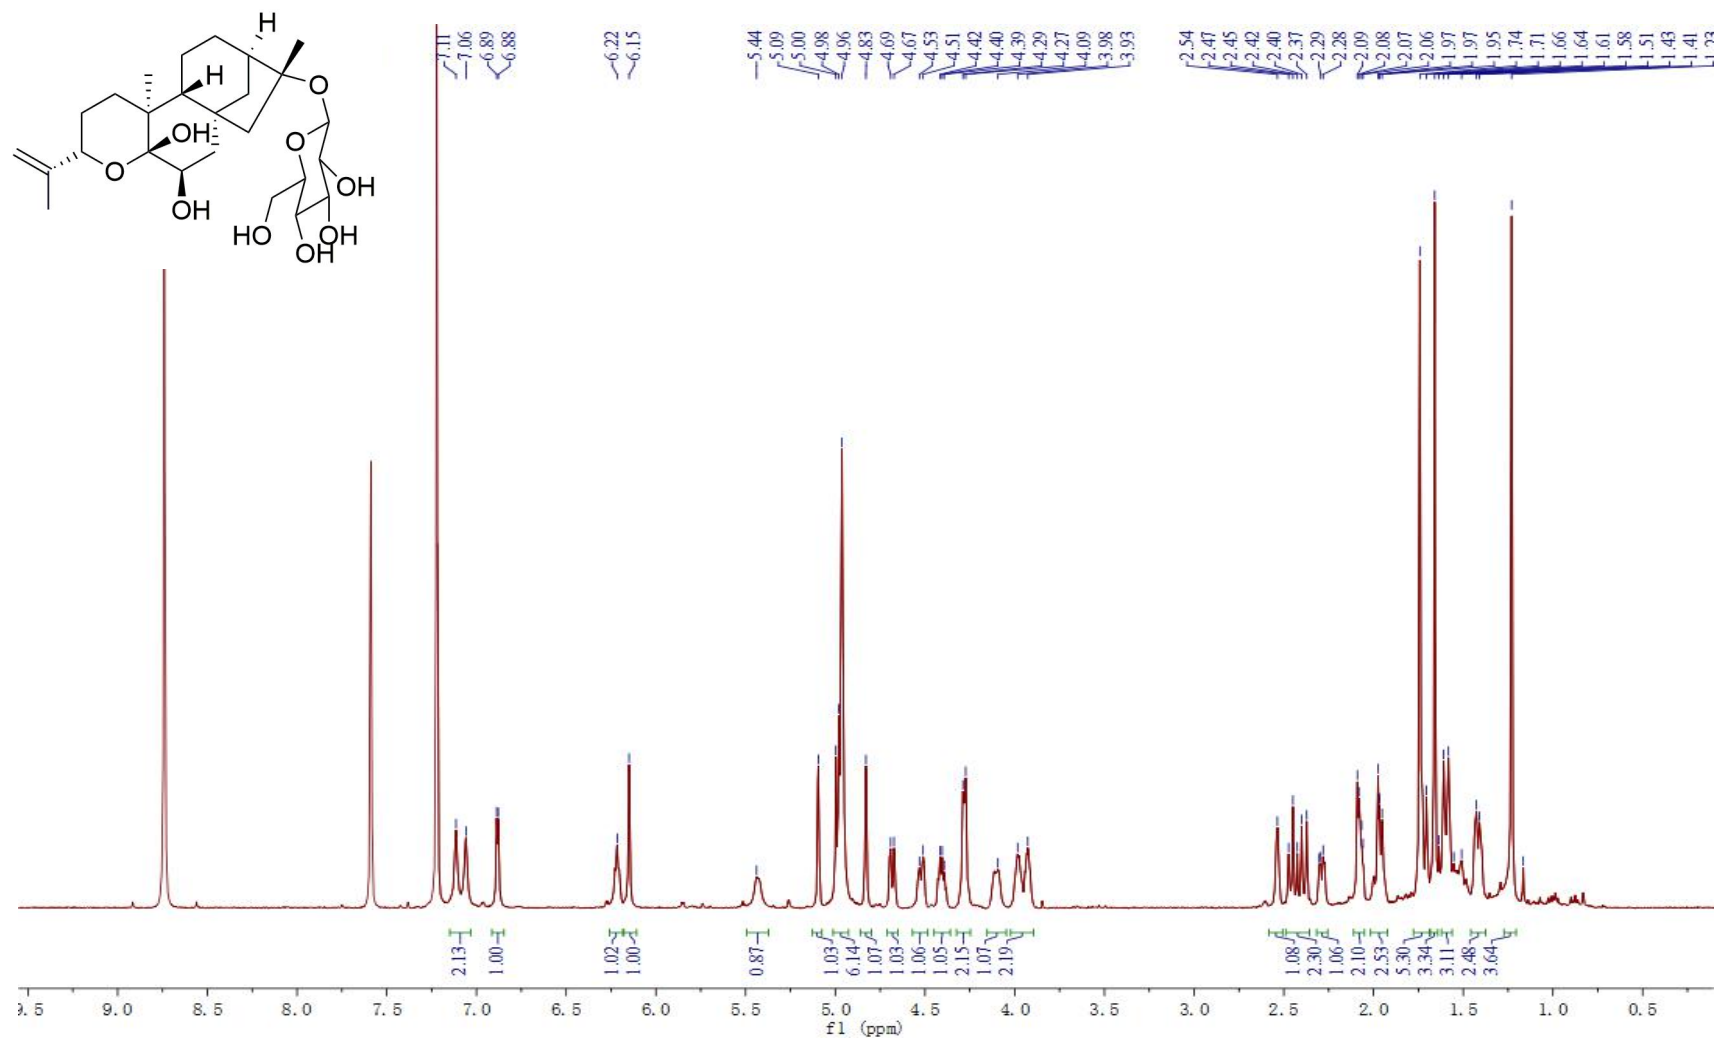

The  $^1\text{H}$  NMR spectrum of **12** in  $\text{C}_5\text{D}_5\text{N}$  (500 MHz)

CARBON\_1  
DD2-500

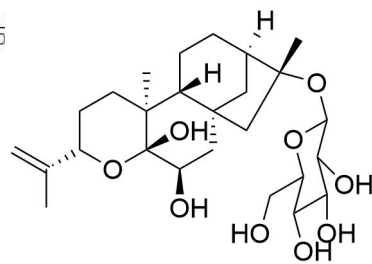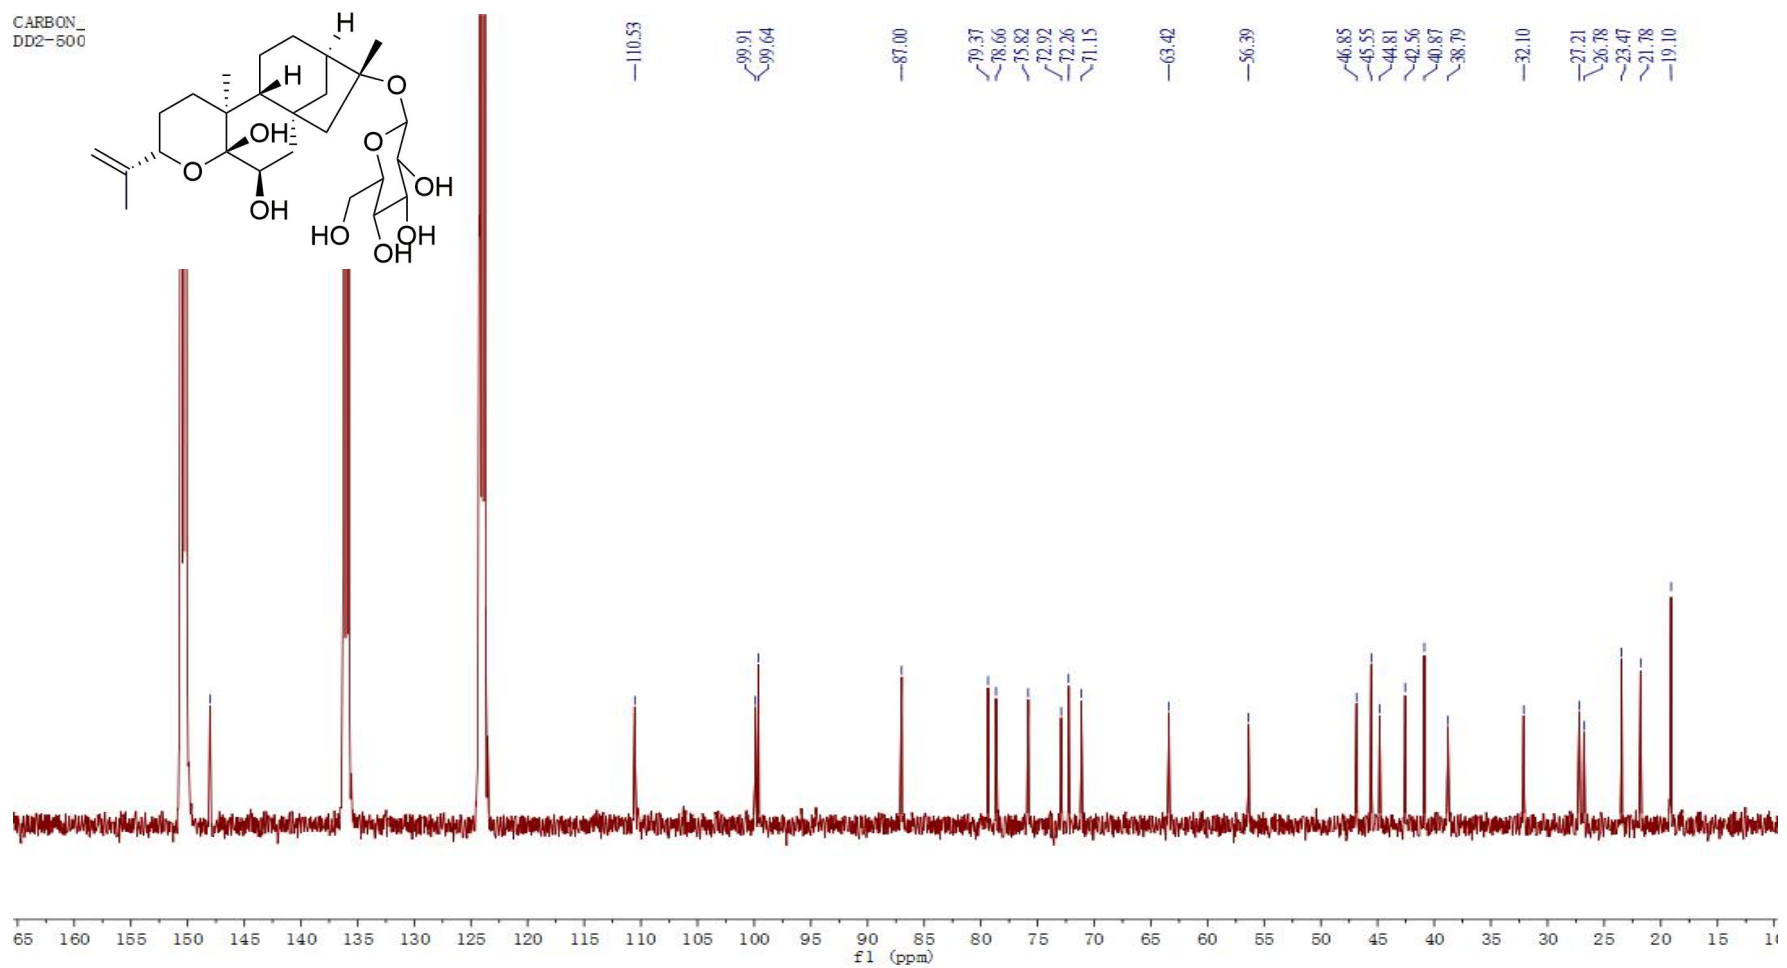

The  $^{13}\text{C}$  NMR spectrum of **12** in  $\text{C}_5\text{D}_5\text{N}$  (125 MHz)

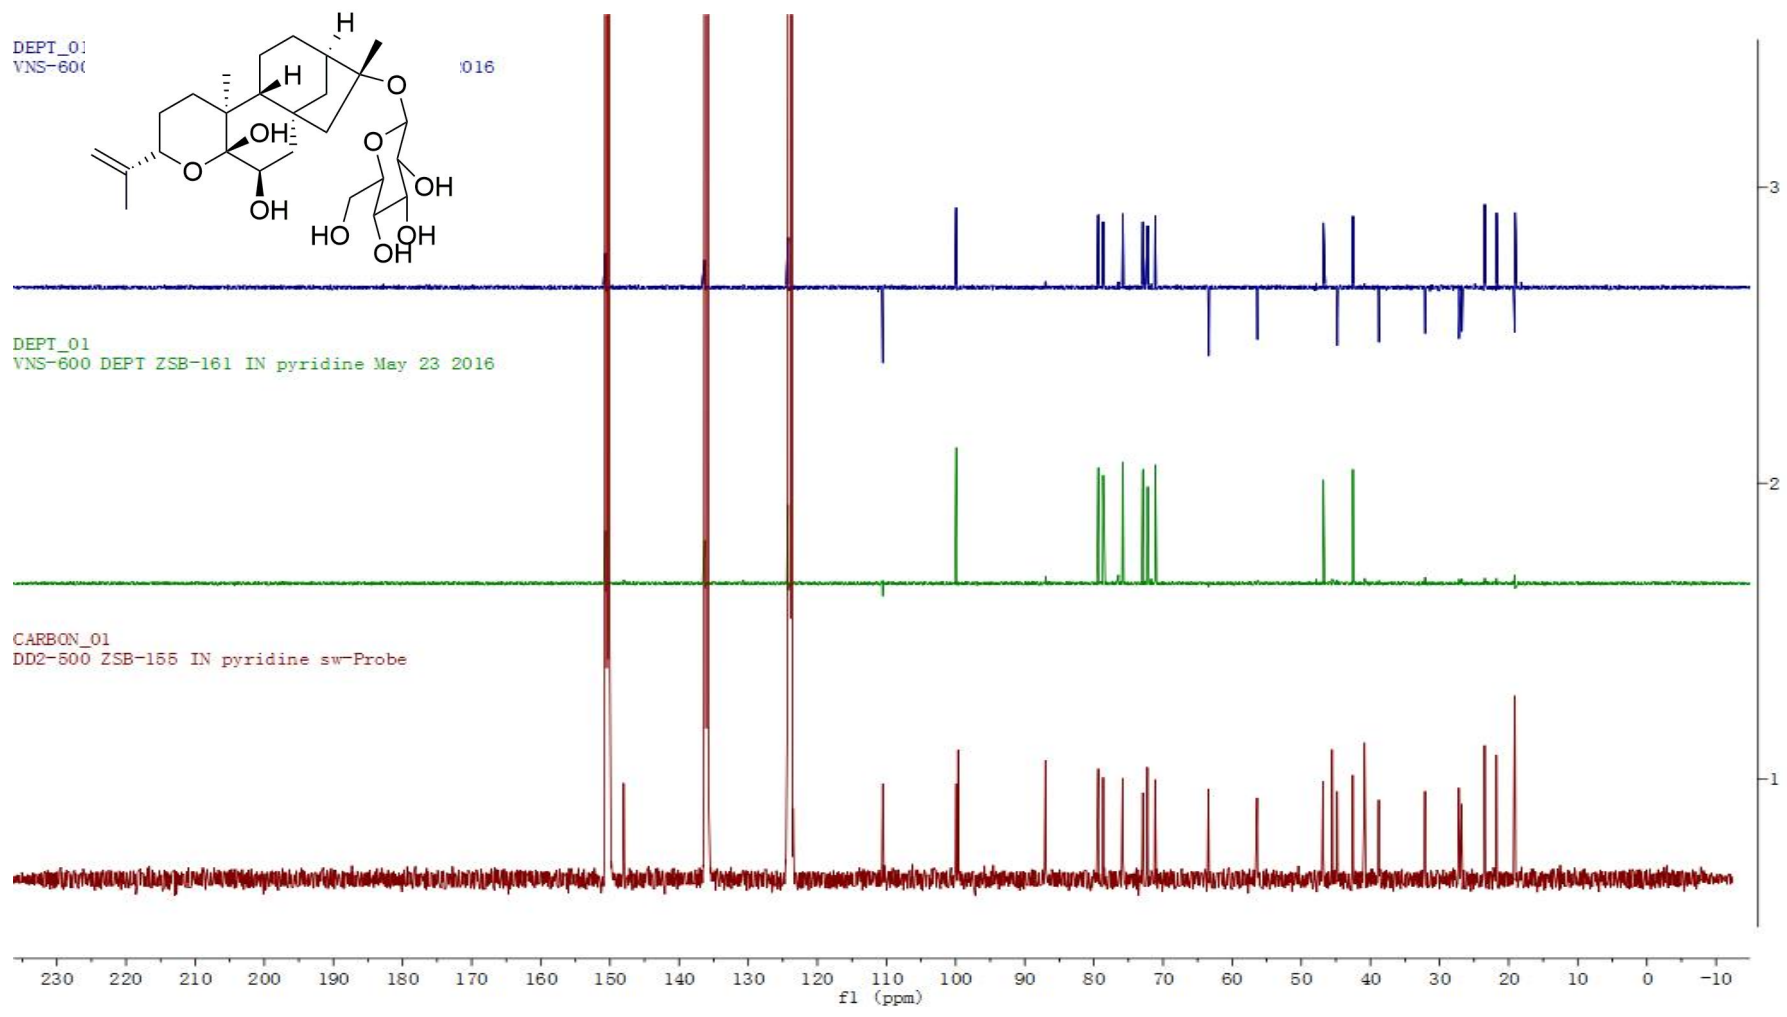

The DEPT spectrum of **12** in  $C_5D_5N$  (125 MHz)

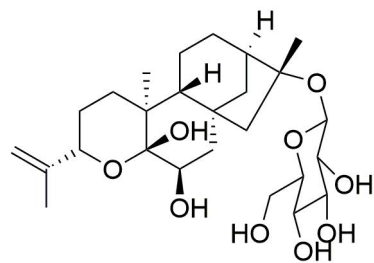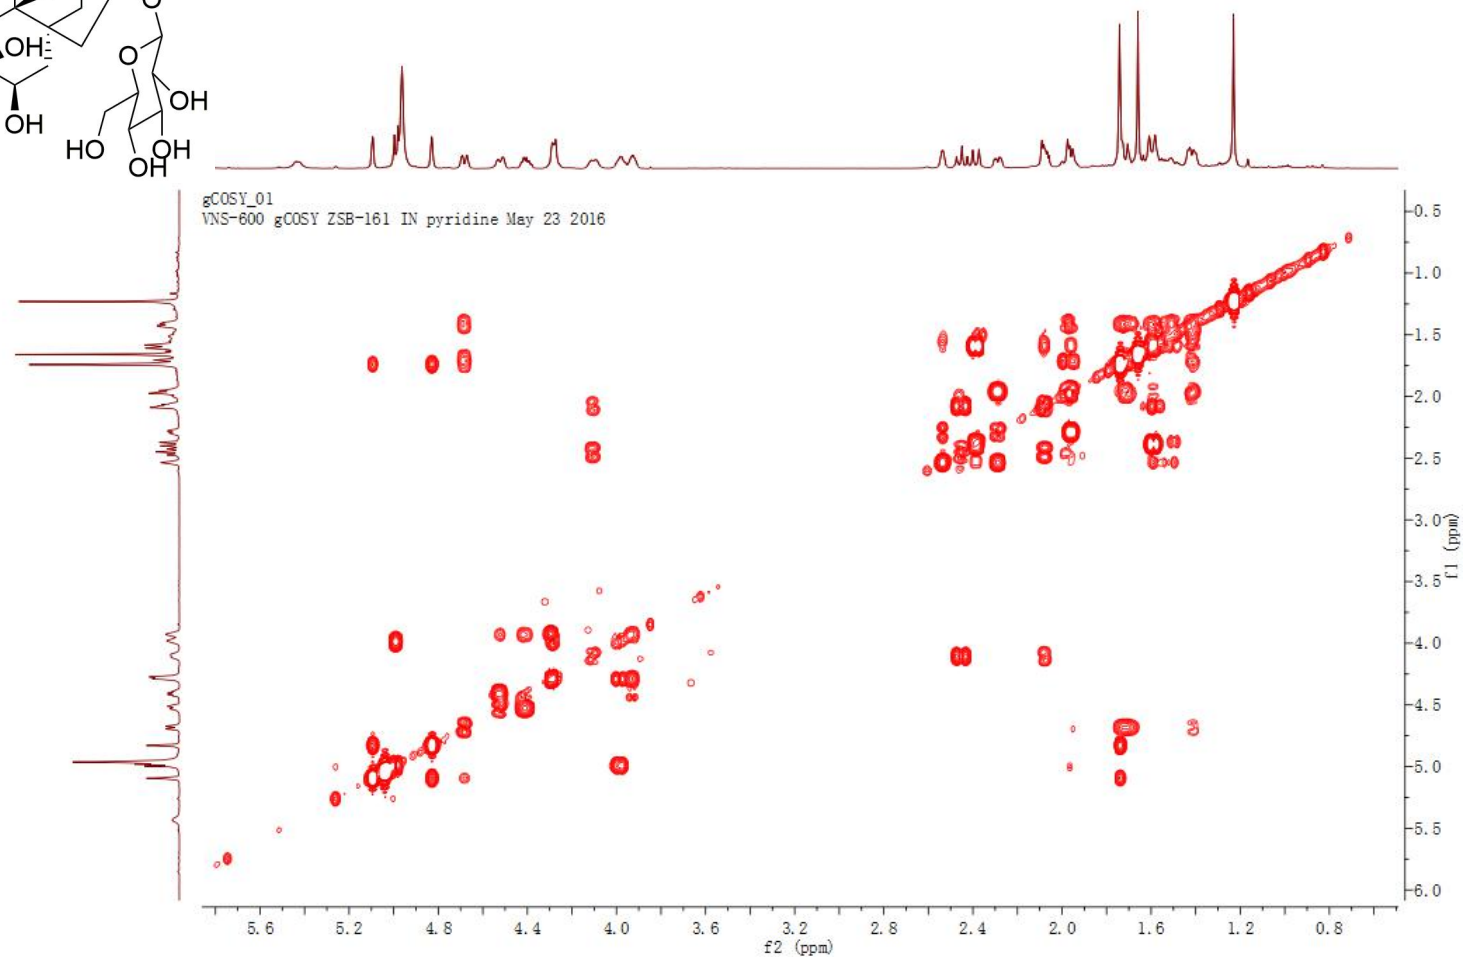

The COSY spectrum of **12** in C<sub>5</sub>D<sub>5</sub>N (500 MHz)

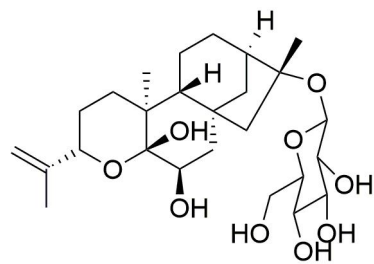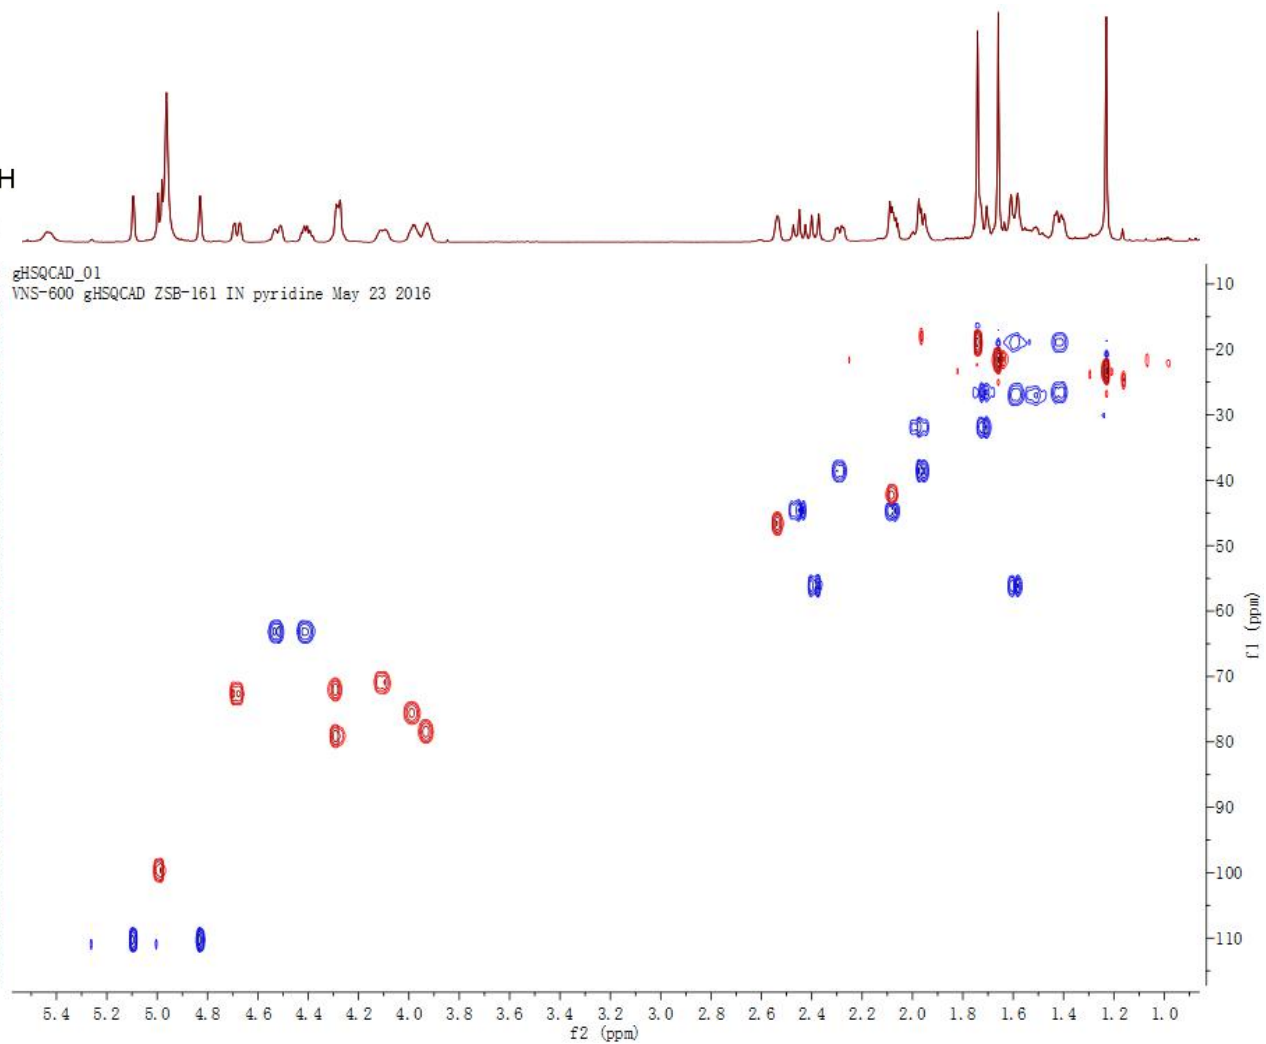

The HSQC spectrum of **12** in  $\text{C}_5\text{D}_5\text{N}$  ( $^1\text{H}$ : 500 MHz,  $^{13}\text{C}$ : 125 MHz)

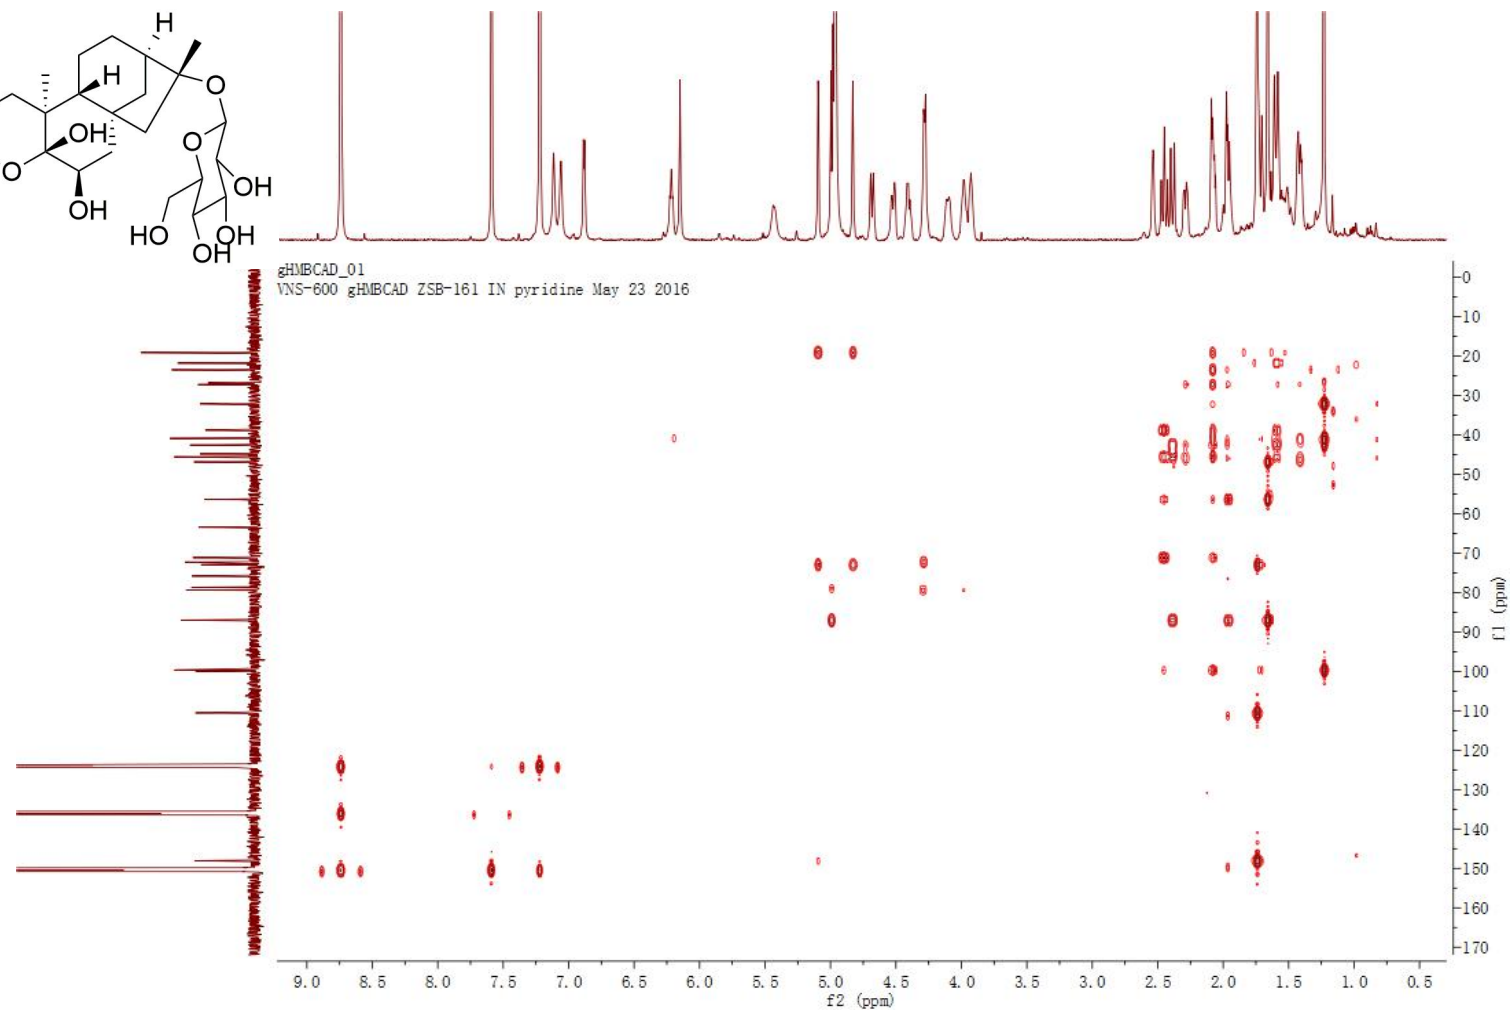

The HMBC spectrum of **12** in  $C_5D_5N$  ( $^1H$ : 500 MHz,  $^{13}C$ : 125 MHz)



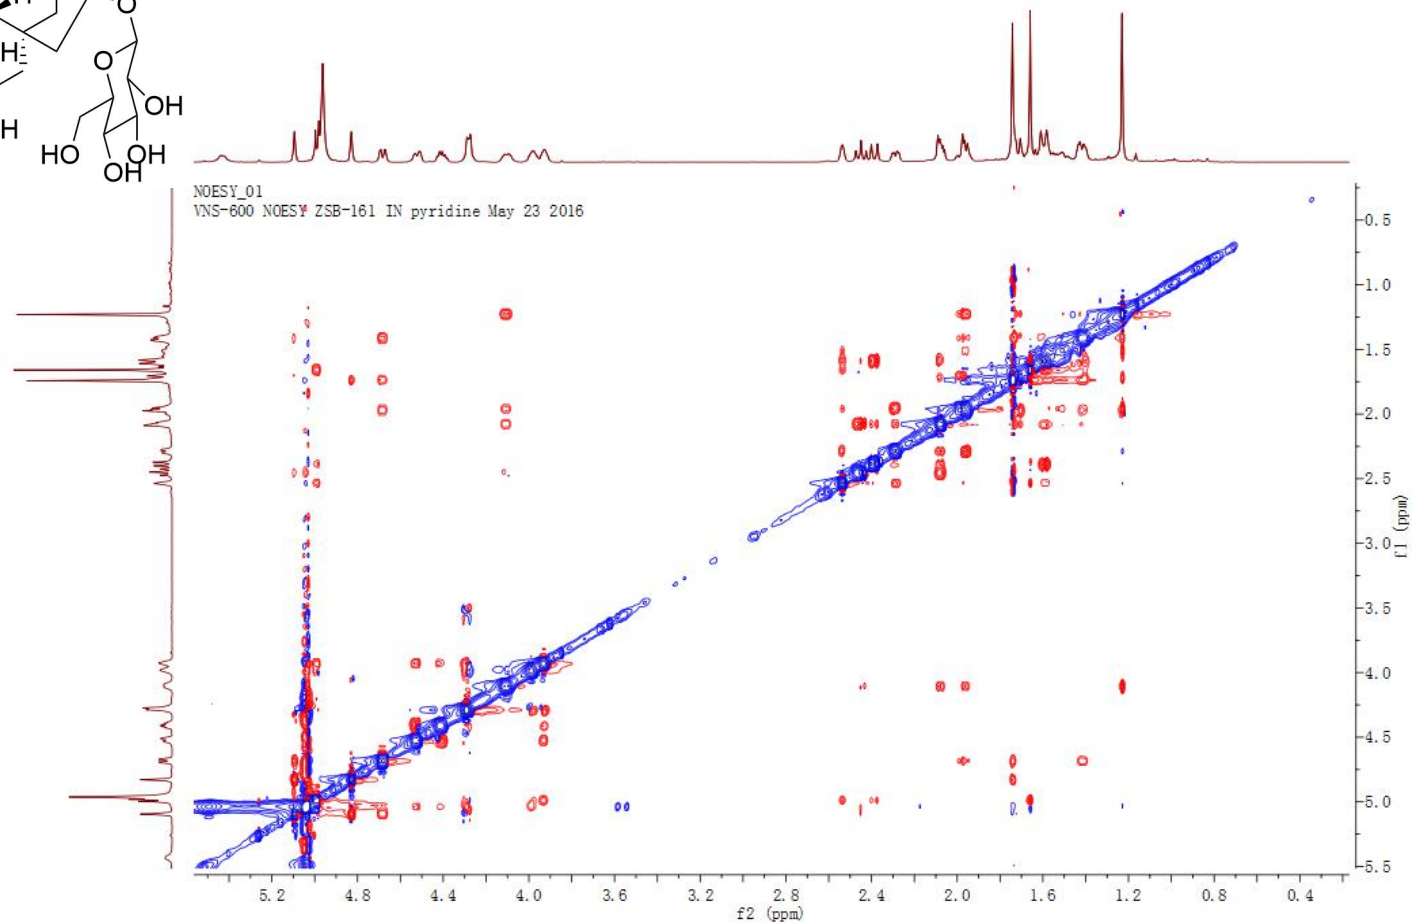

The NOESY spectrum of **12** in  $C_5D_5N$  (500 MHz)

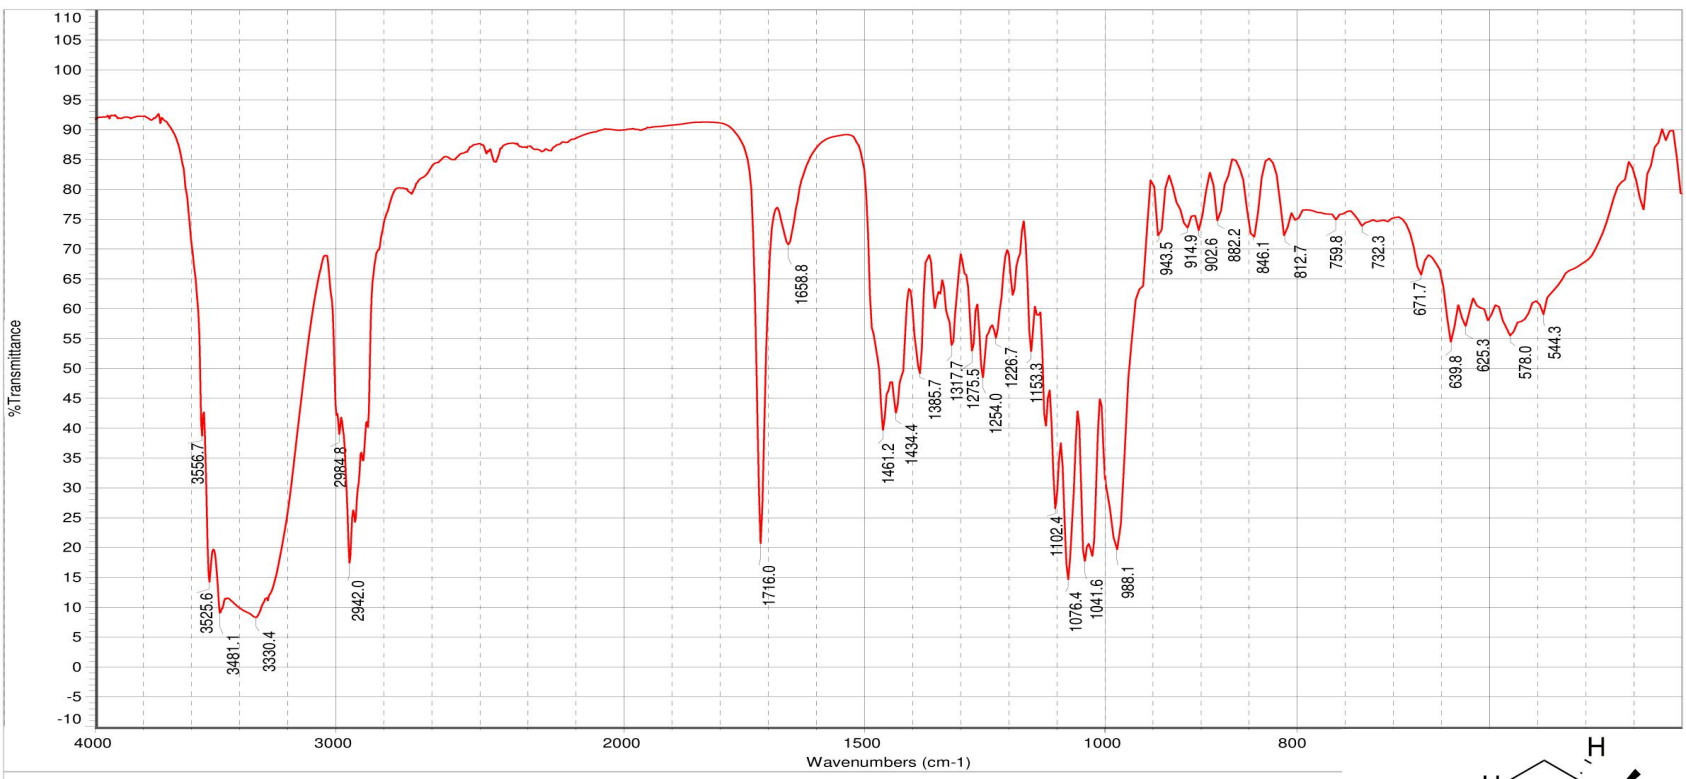

日期: 星期四 11月 03 10:19:57 2016 (GMT+08:00) Sample Name : ZSB - 159 (显微镜透射法 FT- IR Microscope Transr  
 扫描次数: 100 傅里叶变换红外显微镜 (FT-IR Microscope): Centaurus  
 分辨率: 8.000 美国热电公司 (Thermo) 傅里叶变换红外光谱仪: Nicolet 5700

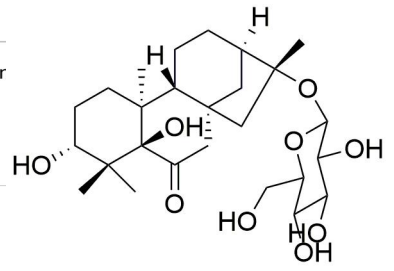

The IR spectrum of 13

MS Formula Results: + Scan (6.856 min) Sub (2016053102.d)

| m/z      | Ion                 | Formula                                          | Abundance |
|----------|---------------------|--------------------------------------------------|-----------|
| 521.2719 | (M+Na) <sup>+</sup> | C <sub>26</sub> H <sub>42</sub> NaO <sub>9</sub> | 129910.7  |

  

| Best                                | Formula (M)                                                                  | Ion Formula                                                                    | Score | Cross Sco | Mass     | Calc Mass | Calc m/z | Diff (ppm) | Abs Diff (ppm) | Mass Match | Abund Match | Spacing Match | DBE |
|-------------------------------------|------------------------------------------------------------------------------|--------------------------------------------------------------------------------|-------|-----------|----------|-----------|----------|------------|----------------|------------|-------------|---------------|-----|
| <input checked="" type="checkbox"/> | C <sub>26</sub> H <sub>42</sub> O <sub>9</sub>                               | C <sub>26</sub> H <sub>42</sub> NaO <sub>9</sub>                               | 99.89 |           | 498.2827 | 498.2829  | 521.2721 | 0.42       | 0.42           | 99.99      | 99.65       | 99.99         | 6   |
| <input type="checkbox"/>            | C <sub>30</sub> H <sub>42</sub> O <sub>4</sub> S                             | C <sub>30</sub> H <sub>42</sub> NaO <sub>4</sub> S                             | 99.1  |           | 498.2827 | 498.2804  | 521.2696 | -4.61      | 4.61           | 99.33      | 98.22       | 99.7          | 10  |
| <input type="checkbox"/>            | C <sub>27</sub> H <sub>46</sub> O <sub>4</sub> S <sub>2</sub>                | C <sub>27</sub> H <sub>46</sub> NaO <sub>4</sub> S <sub>2</sub>                | 98.34 |           | 498.2827 | 498.2838  | 521.273  | 2.15       | 2.15           | 99.85      | 95.12       | 99.18         | 5   |
| <input type="checkbox"/>            | C <sub>22</sub> H <sub>46</sub> N <sub>2</sub> O <sub>6</sub> S <sub>2</sub> | C <sub>22</sub> H <sub>46</sub> N <sub>2</sub> NaO <sub>6</sub> S <sub>2</sub> | 97.56 |           | 498.2827 | 498.2797  | 521.2689 | -5.93      | 5.93           | 98.9       | 94.13       | 98.98         | 1   |

page 1

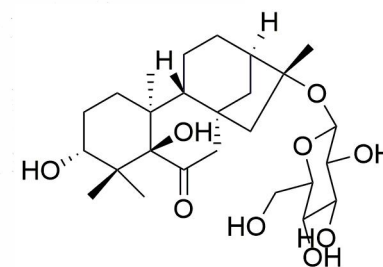

The HRESIMS spectrum of **13**

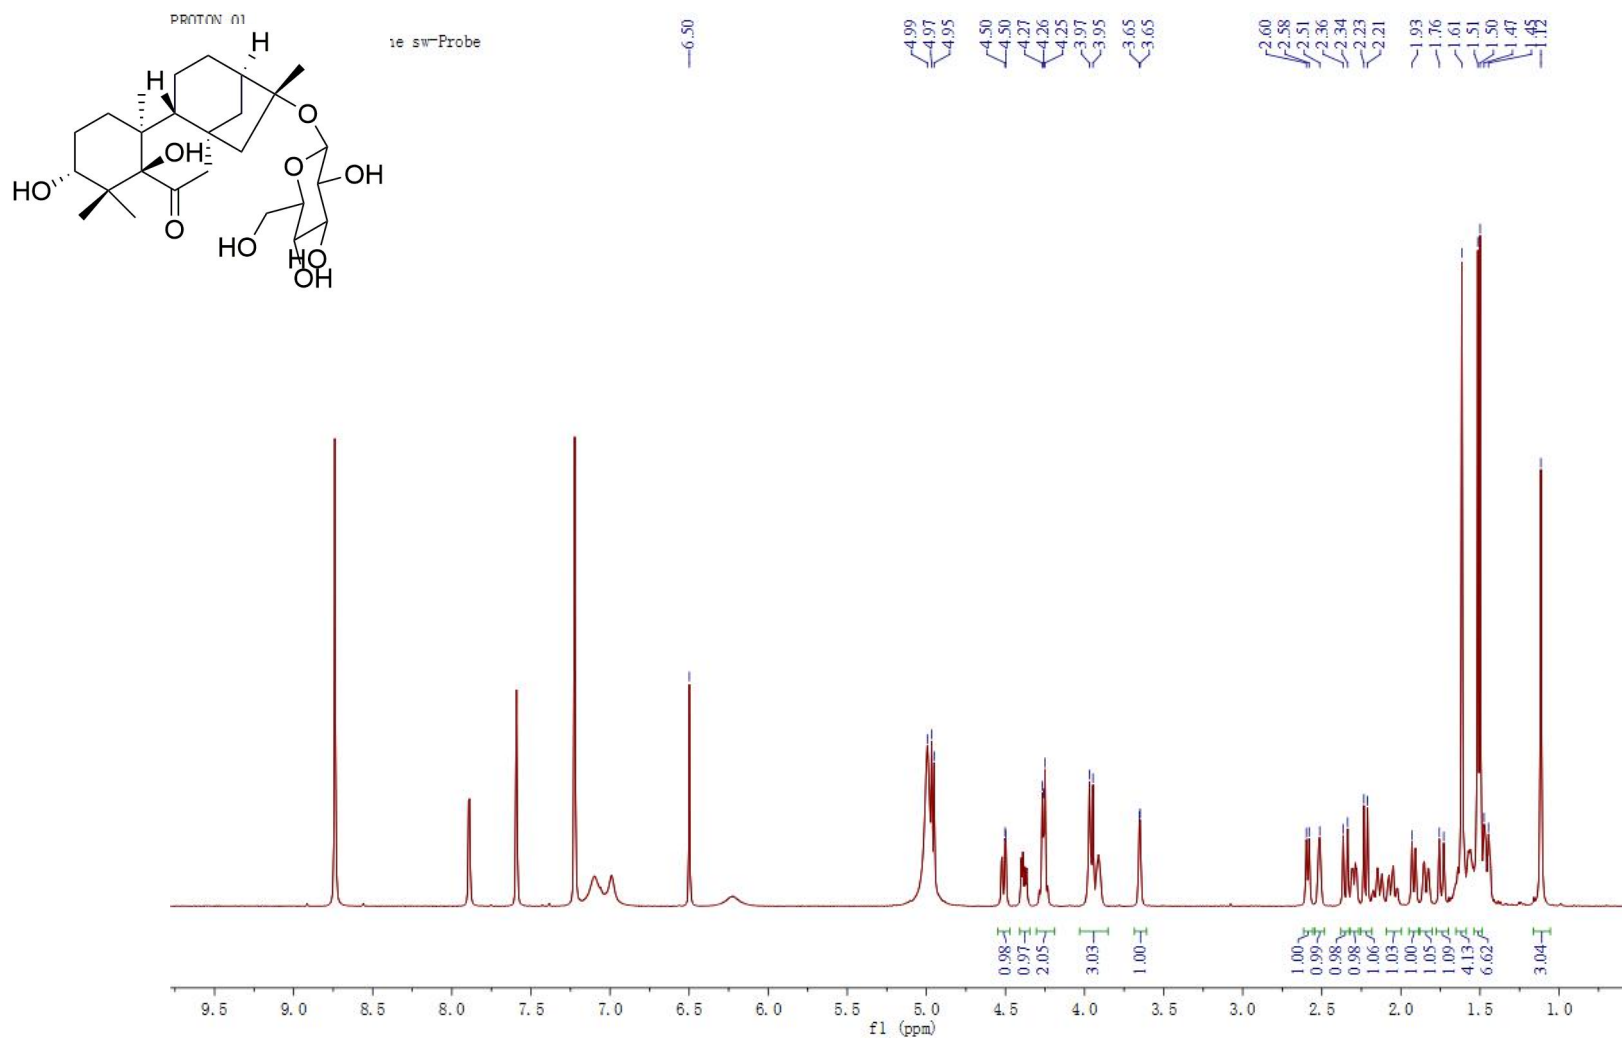

The  $^1\text{H}$  NMR spectrum of **13** in  $\text{C}_5\text{D}_5\text{N}$  (500 MHz)

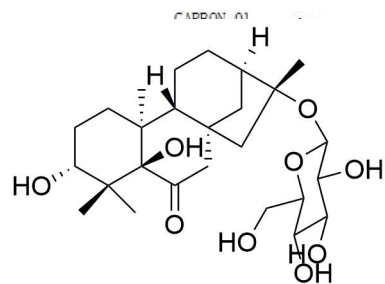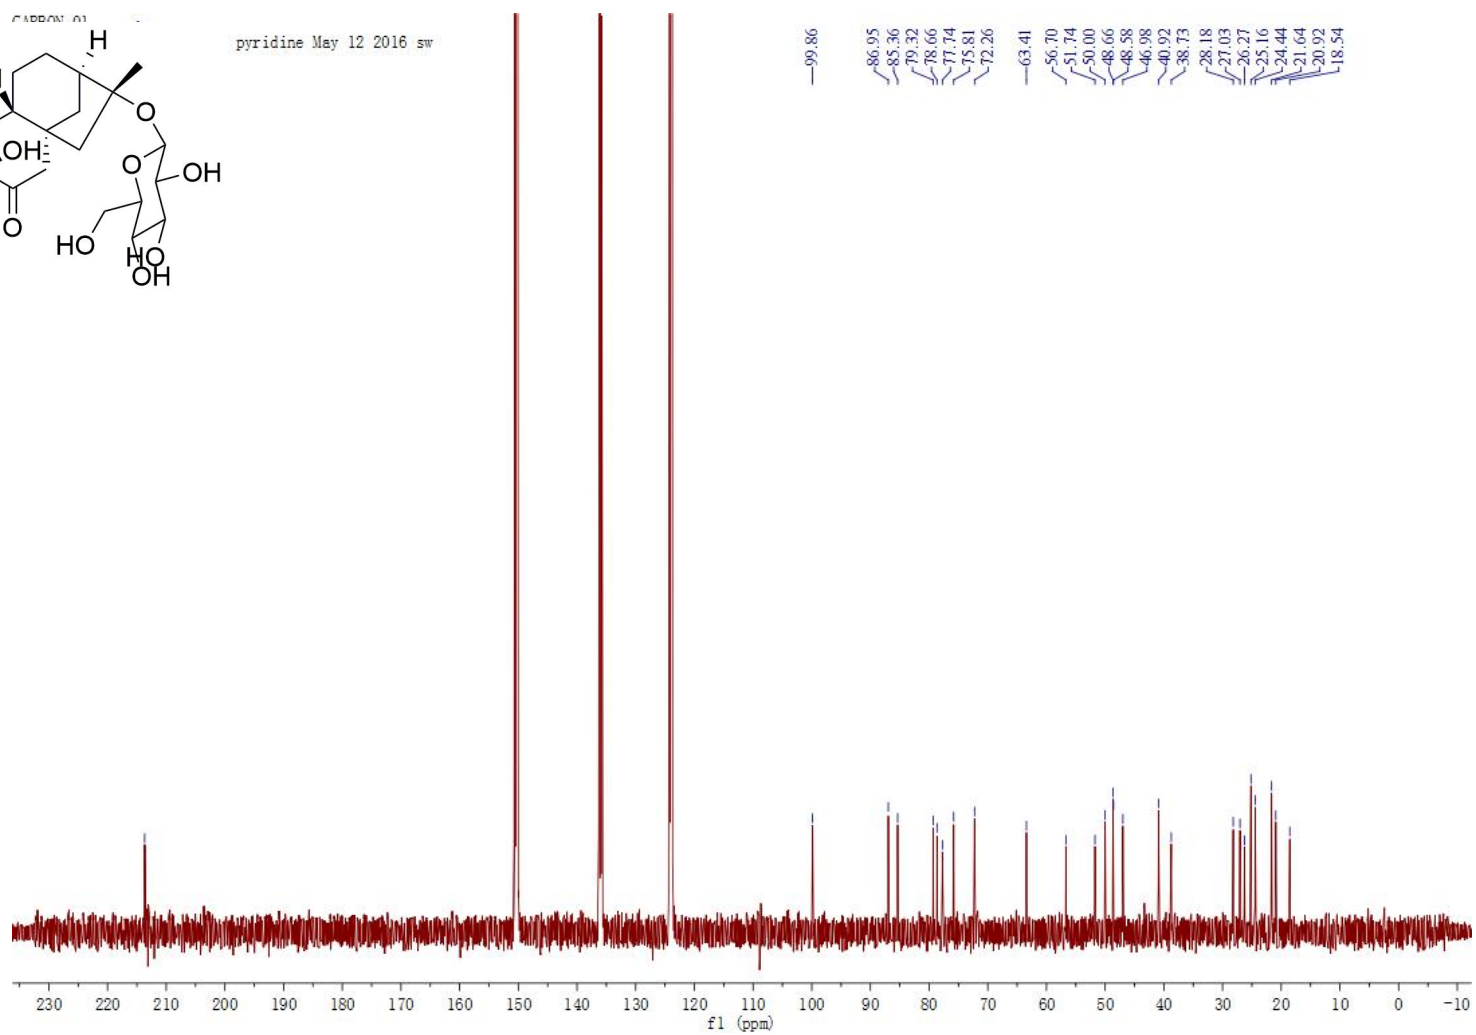

The  $^{13}\text{C}$  NMR spectrum of **13** in  $\text{C}_5\text{D}_5\text{N}$  (125 MHz)

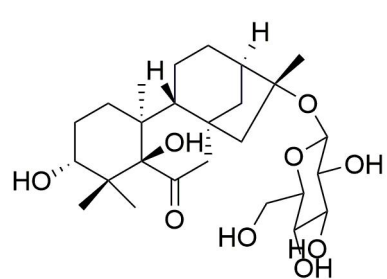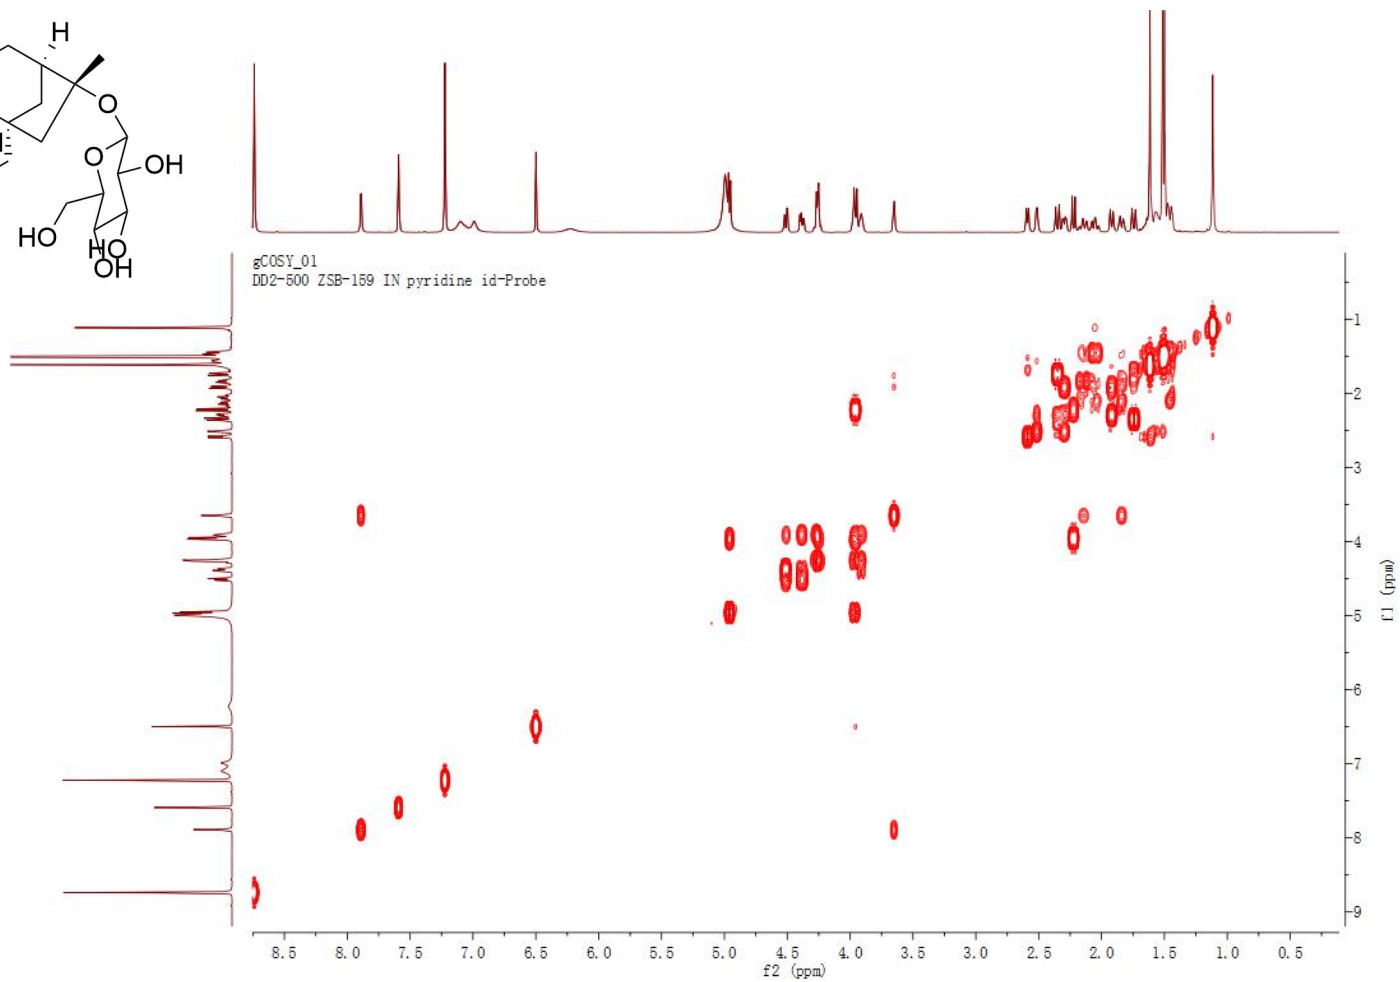

The COSY spectrum of **13** in  $C_5D_5N$  (500 MHz)

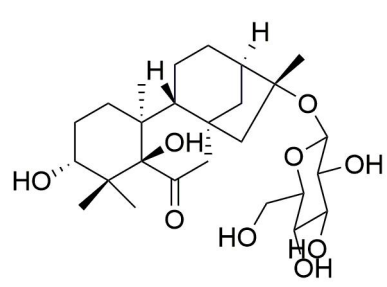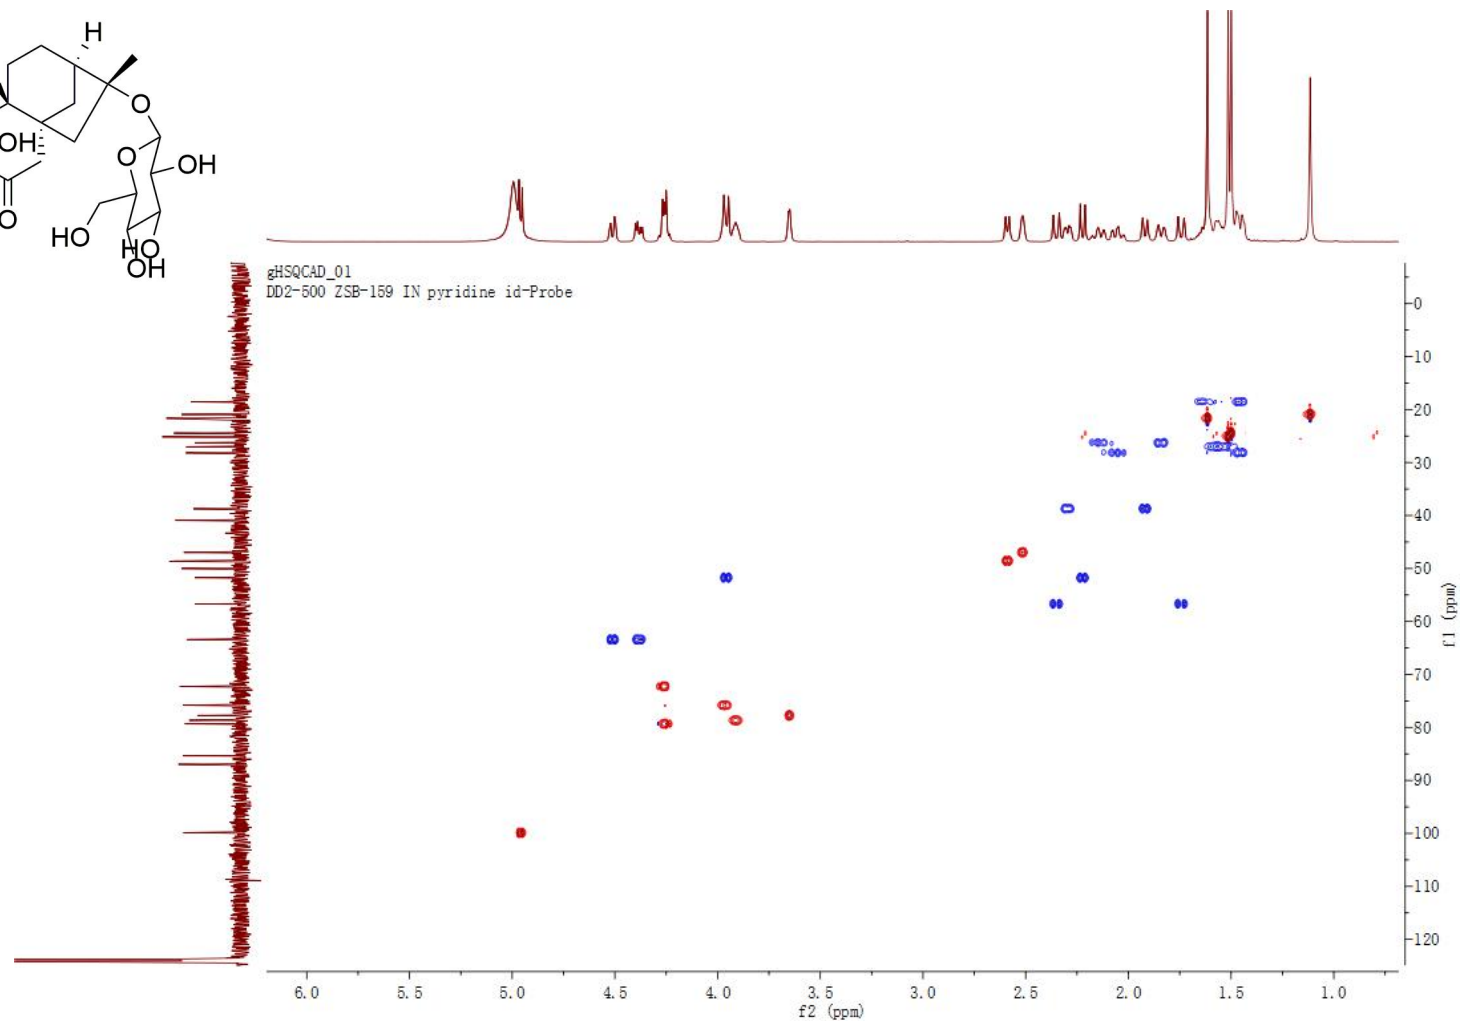

The HSQC spectrum of **13** in  $\text{C}_5\text{D}_5\text{N}$  ( $^1\text{H}$ : 500 MHz,  $^{13}\text{C}$ : 125 MHz)

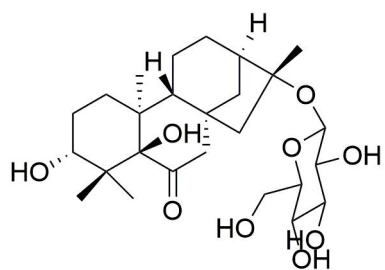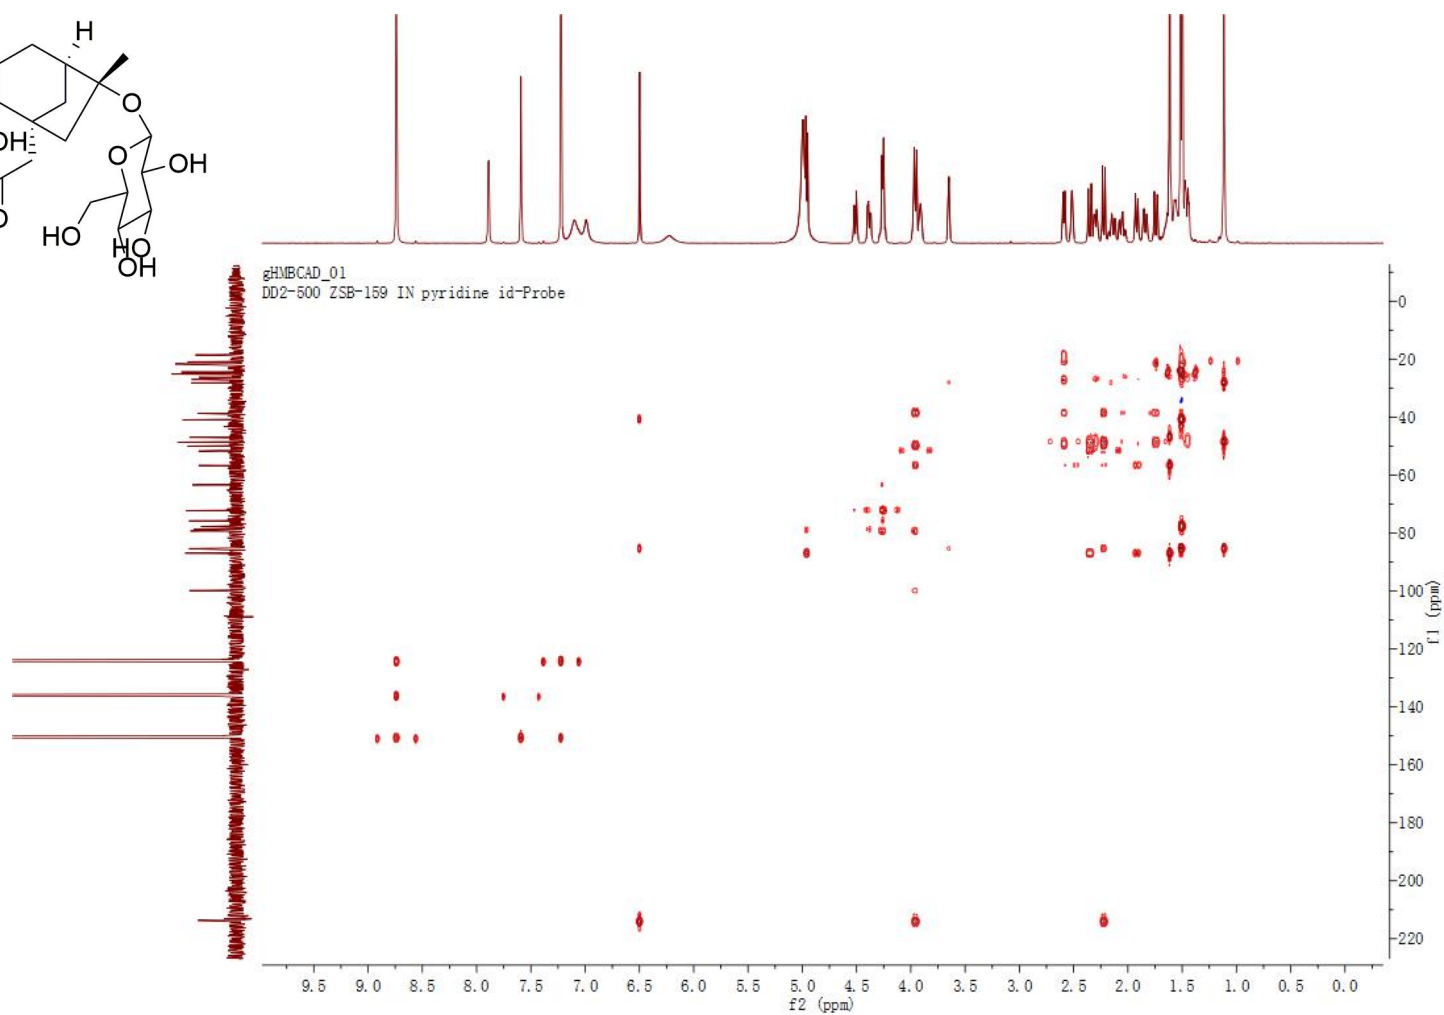

The HMBC spectrum of **13** in  $C_5D_5N$  ( $^1H$ : 500 MHz,  $^{13}C$ : 125 MHz)



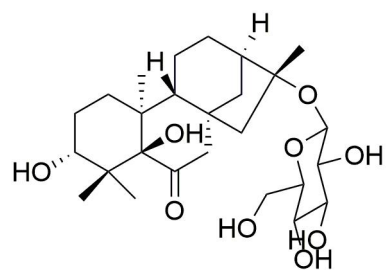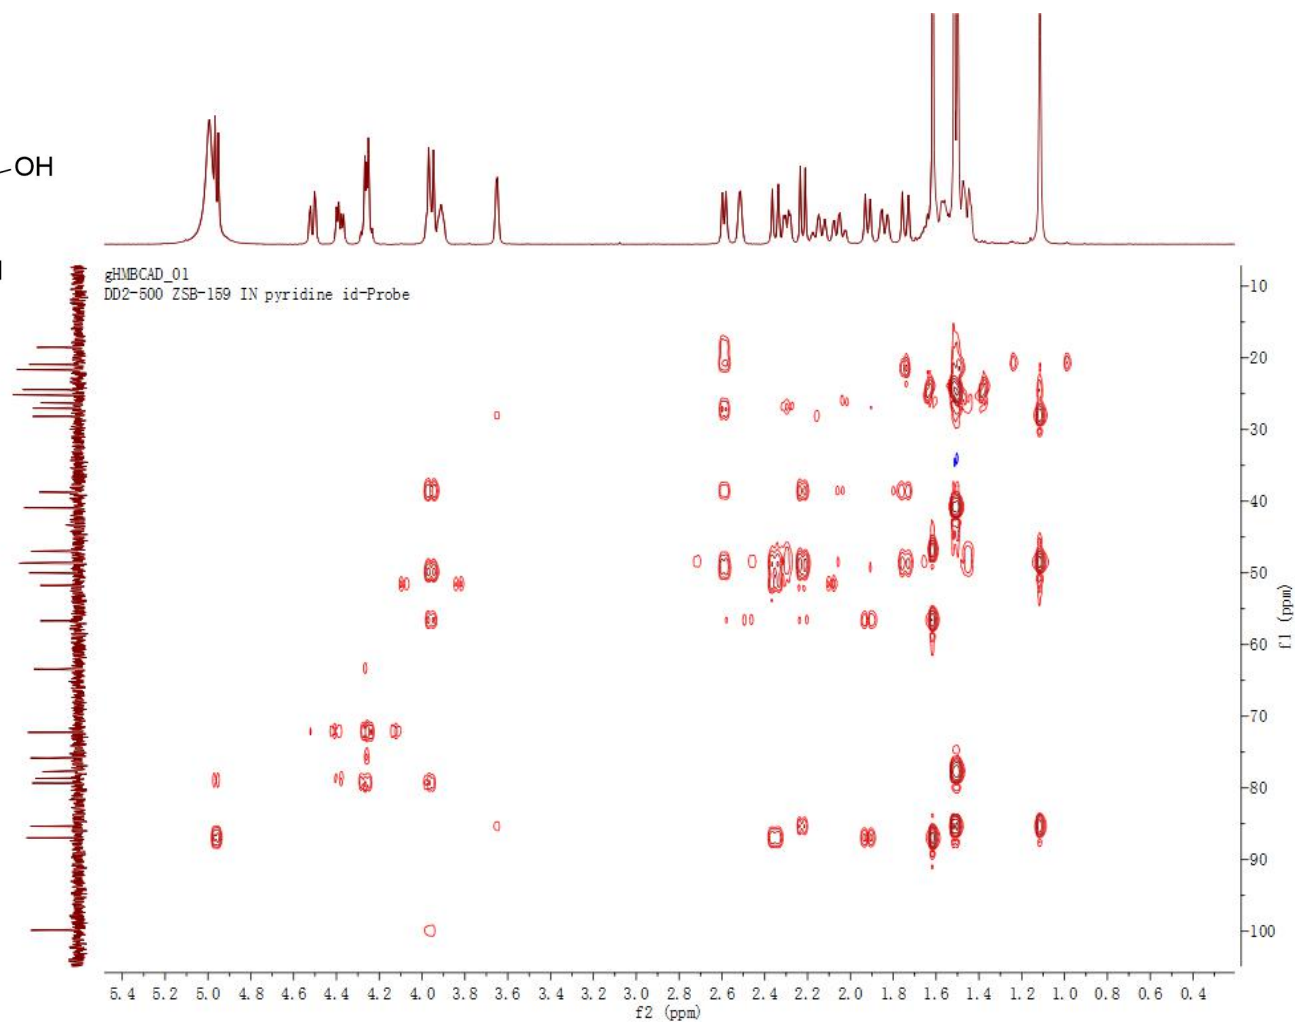

The HMBC spectrum (amplified) of **13** in  $C_5D_5N$  ( $^1H$ : 500 MHz,  $^{13}C$ : 125 MHz)

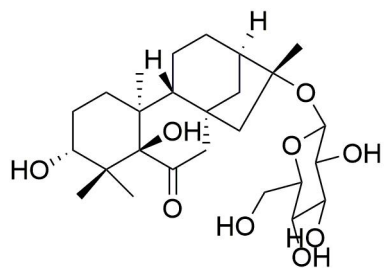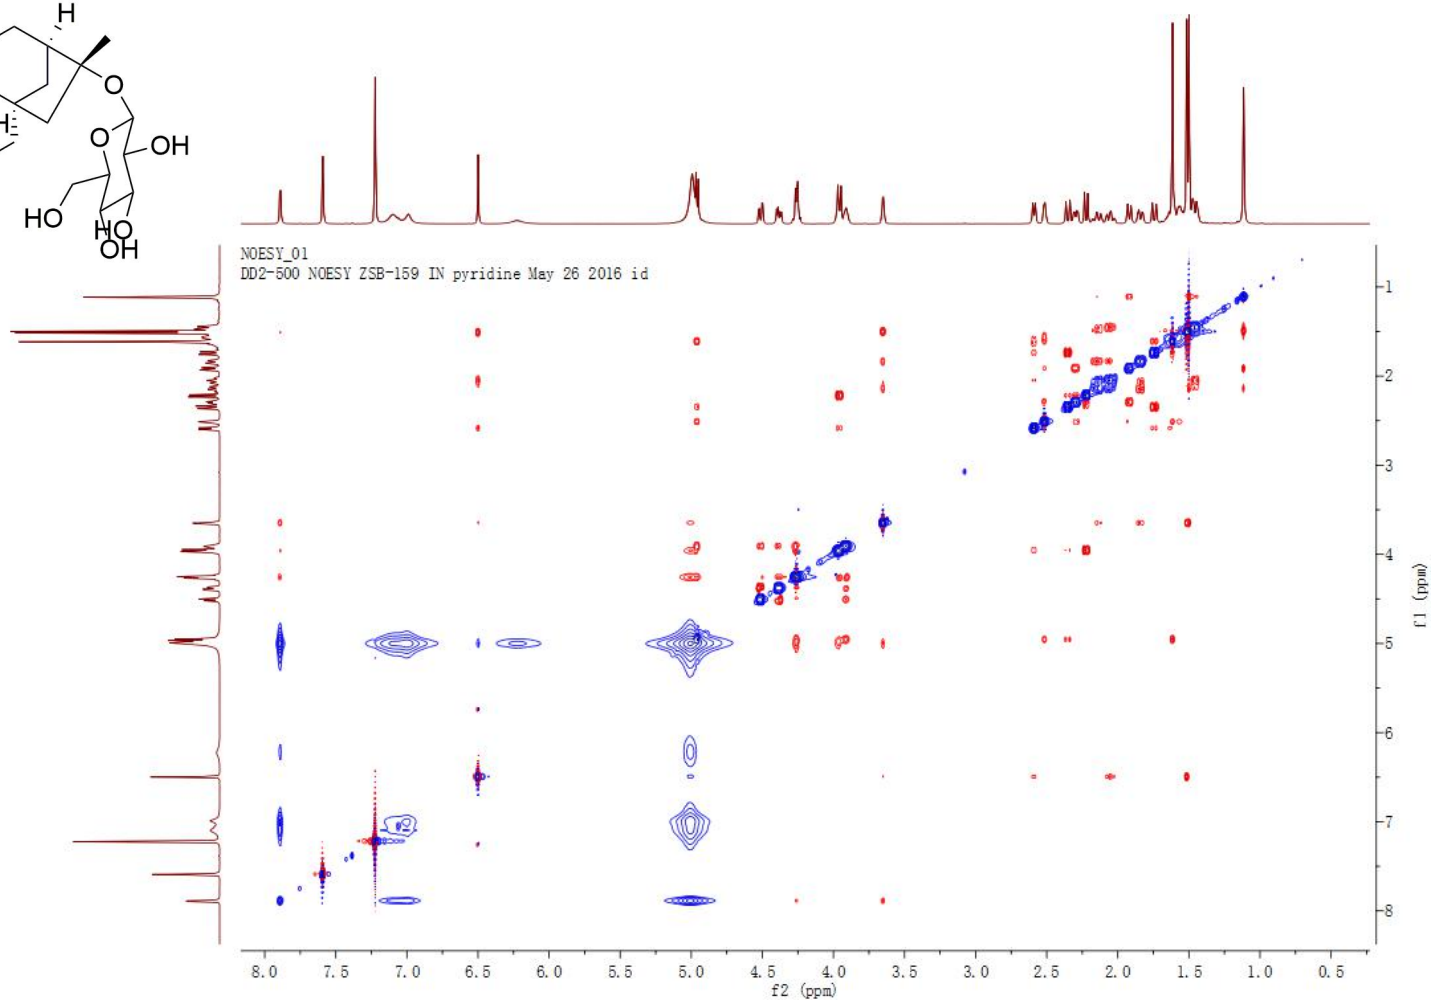

The NOESY spectrum of **13** in  $C_5D_5N$  (500 MHz)

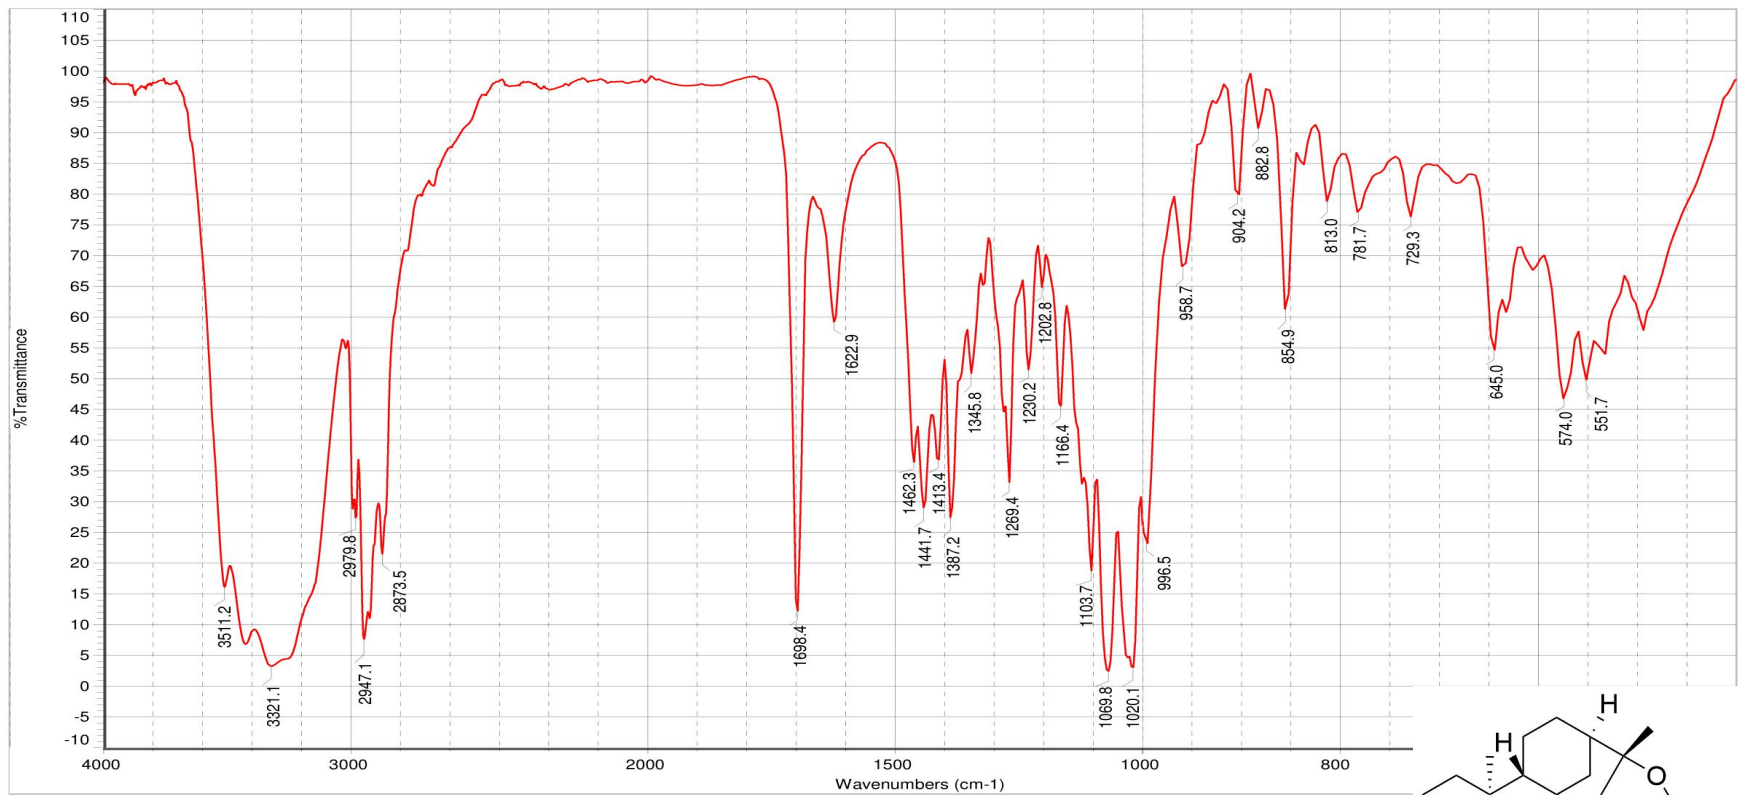

日期: 星期五 8月 26 16:04:34 2016 (GMT+08:00) Sample Name : ZSB - 184

(显微镜透射法 FT- IR Microscope Transmis

扫描次数: 100

傅里叶变换红外显微镜(FT-IR Microscope): Centaurμs

分辨率: 8.000

美国热电公司(Thermo)傅里叶变换红外光谱仪:Nicolet 5700

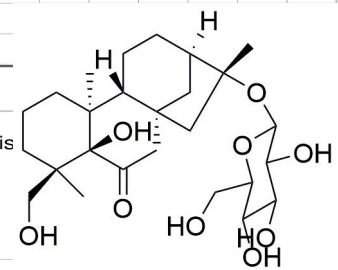

The IR spectrum of 14

MS Formula Results: + Scan (7.428 min) Sub (2016052602.d)

| m/z      | Ion                 | Formula                                          | Abundance |
|----------|---------------------|--------------------------------------------------|-----------|
| 521.2711 | (M+Na) <sup>+</sup> | C <sub>26</sub> H <sub>42</sub> NaO <sub>9</sub> | 140097.7  |

  

| Best                                | Formula (M)                                                                  | Ion Formula                                                                    | Score | Cross Sco | Mass     | Calc Mass | Calc m/z | Diff (ppm) | Abs Diff (ppm) | Mass Match | Abund Match | Spacing Match | DBE |
|-------------------------------------|------------------------------------------------------------------------------|--------------------------------------------------------------------------------|-------|-----------|----------|-----------|----------|------------|----------------|------------|-------------|---------------|-----|
| <input checked="" type="checkbox"/> | C <sub>26</sub> H <sub>42</sub> O <sub>9</sub>                               | C <sub>26</sub> H <sub>42</sub> NaO <sub>9</sub>                               | 99.13 |           | 498.2819 | 498.2829  | 521.2721 | 2.04       | 2.04           | 99.87      | 97.96       | 99.05         | 6   |
| <input type="checkbox"/>            | C <sub>30</sub> H <sub>42</sub> O <sub>4</sub> S                             | C <sub>30</sub> H <sub>42</sub> NaO <sub>4</sub> S                             | 98.79 |           | 498.2819 | 498.2804  | 521.2696 | -2.99      | 2.99           | 99.72      | 98.56       | 97.2          | 10  |
| <input type="checkbox"/>            | C <sub>27</sub> H <sub>46</sub> O <sub>4</sub> S <sub>2</sub>                | C <sub>27</sub> H <sub>46</sub> NaO <sub>4</sub> S <sub>2</sub>                | 98.17 |           | 498.2819 | 498.2838  | 521.273  | 3.76       | 3.76           | 99.55      | 97.94       | 95.68         | 5   |
| <input type="checkbox"/>            | C <sub>22</sub> H <sub>46</sub> N <sub>2</sub> O <sub>6</sub> S <sub>2</sub> | C <sub>22</sub> H <sub>46</sub> N <sub>2</sub> NaO <sub>6</sub> S <sub>2</sub> | 97.84 |           | 498.2819 | 498.2797  | 521.2689 | -4.32      | 4.32           | 99.41      | 97.37       | 95.27         | 1   |

page 1

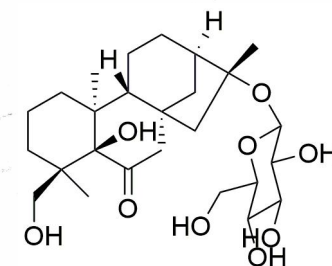

The HRESIMS spectrum of **14**

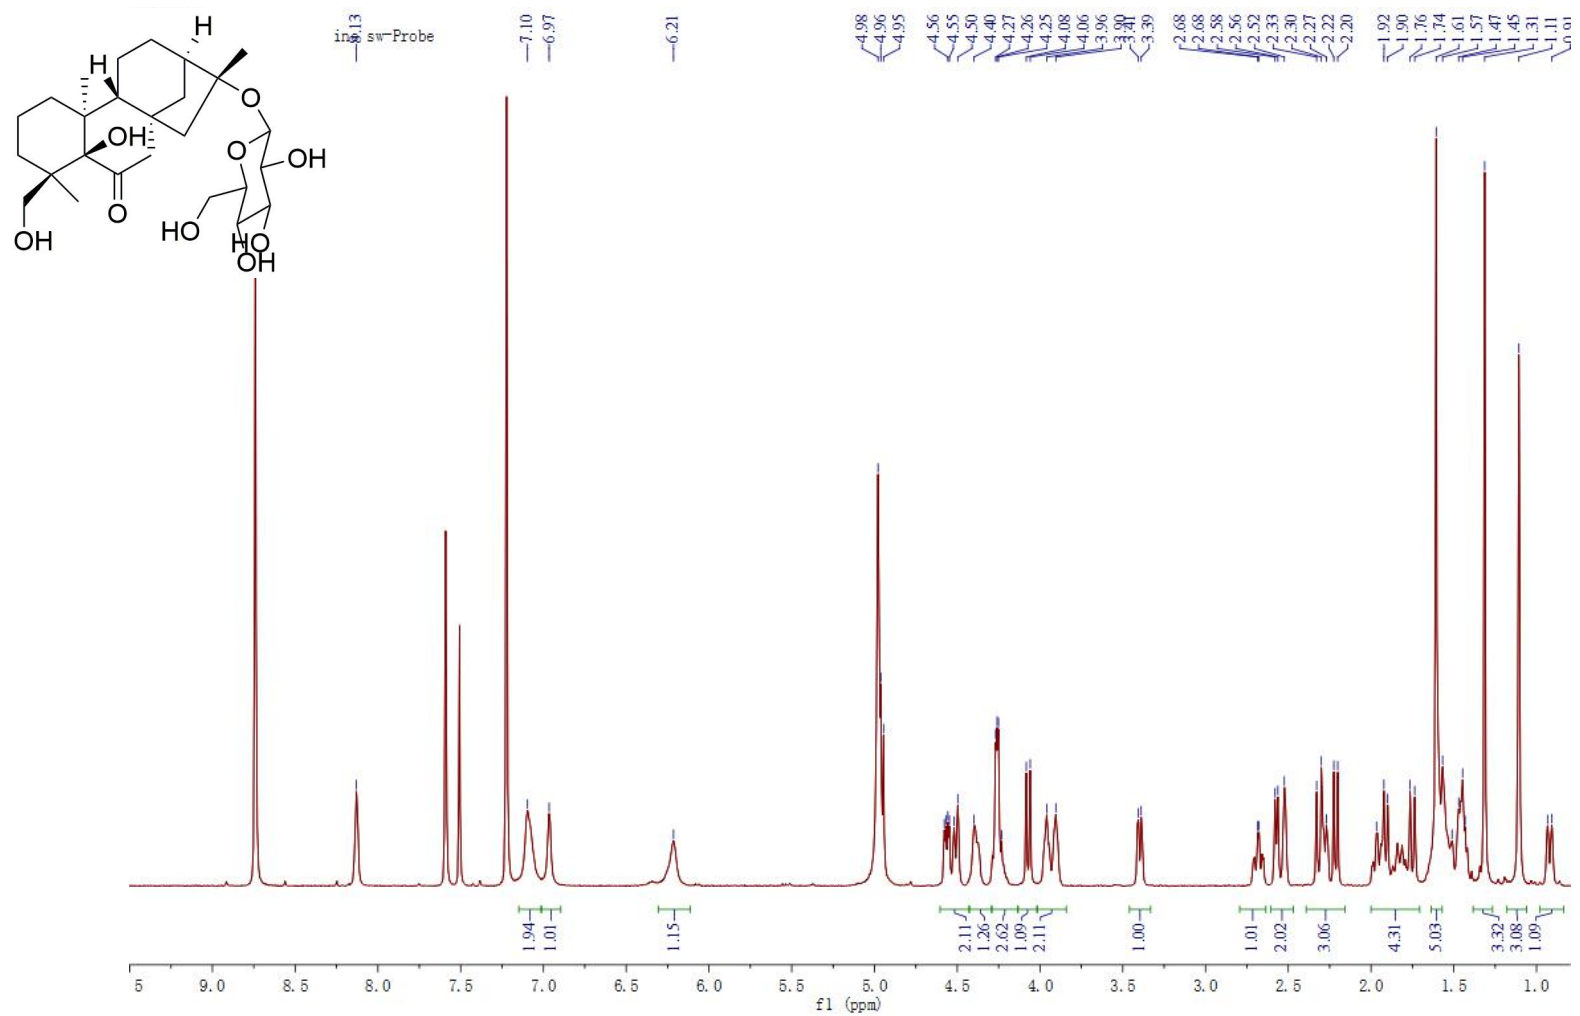

The  $^1\text{H}$  NMR spectrum of **14** in  $\text{C}_5\text{D}_5\text{N}$  (500 MHz)

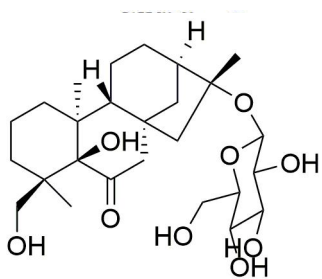

N pyridine May 20 2016 sw

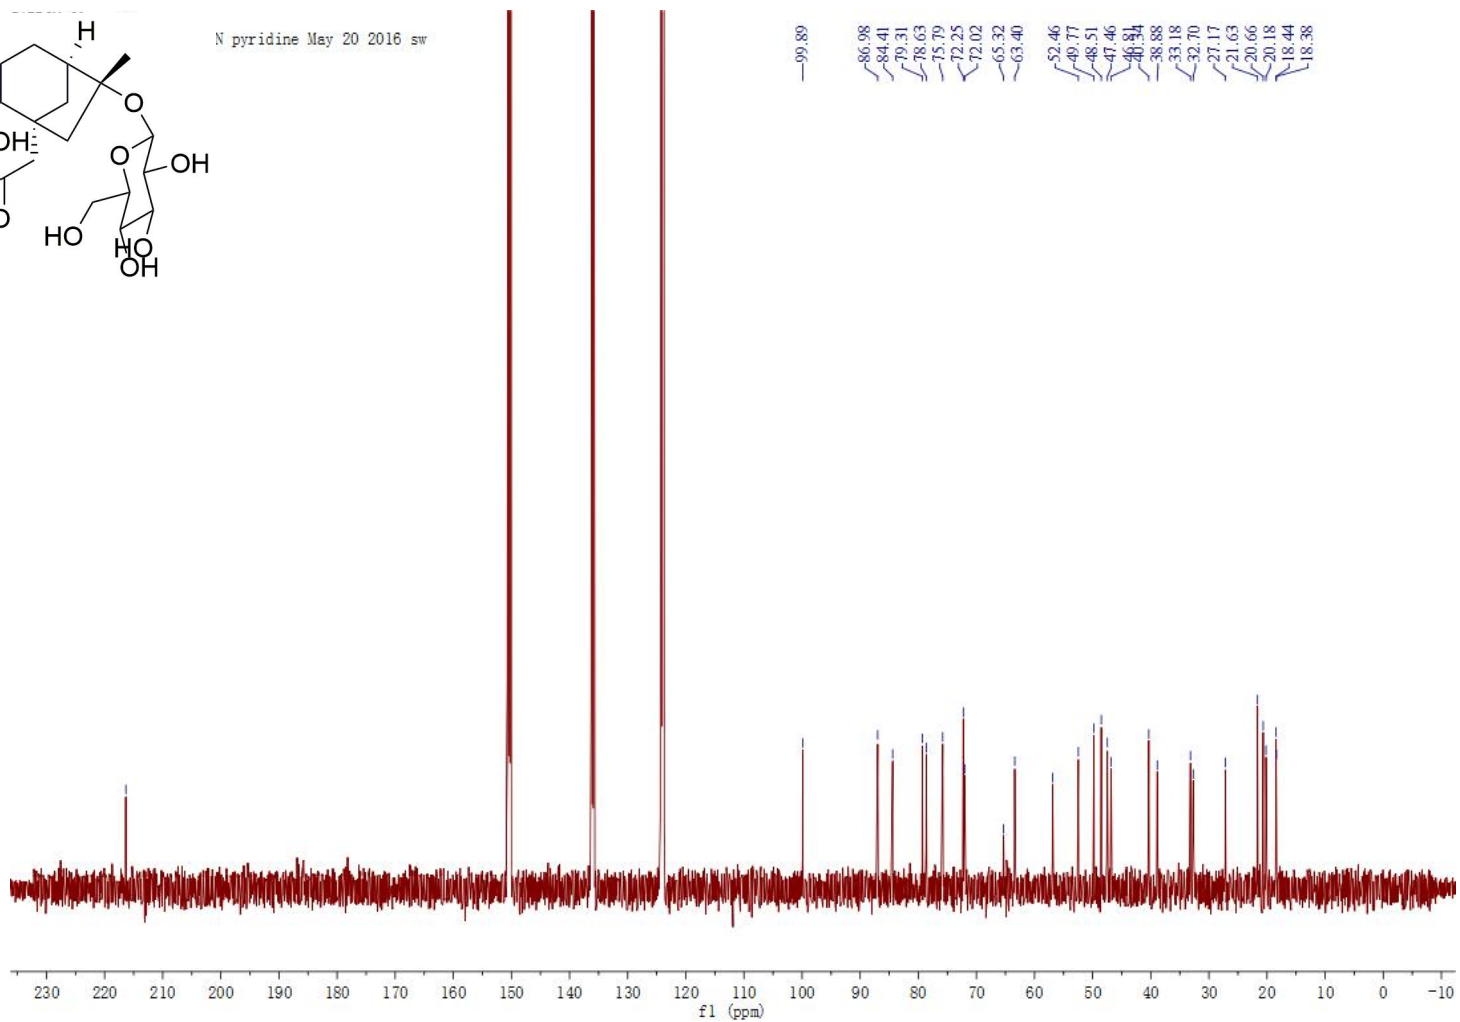

The  $^{13}\text{C}$  NMR spectrum of **14** in  $\text{C}_5\text{D}_5\text{N}$  (125 MHz)

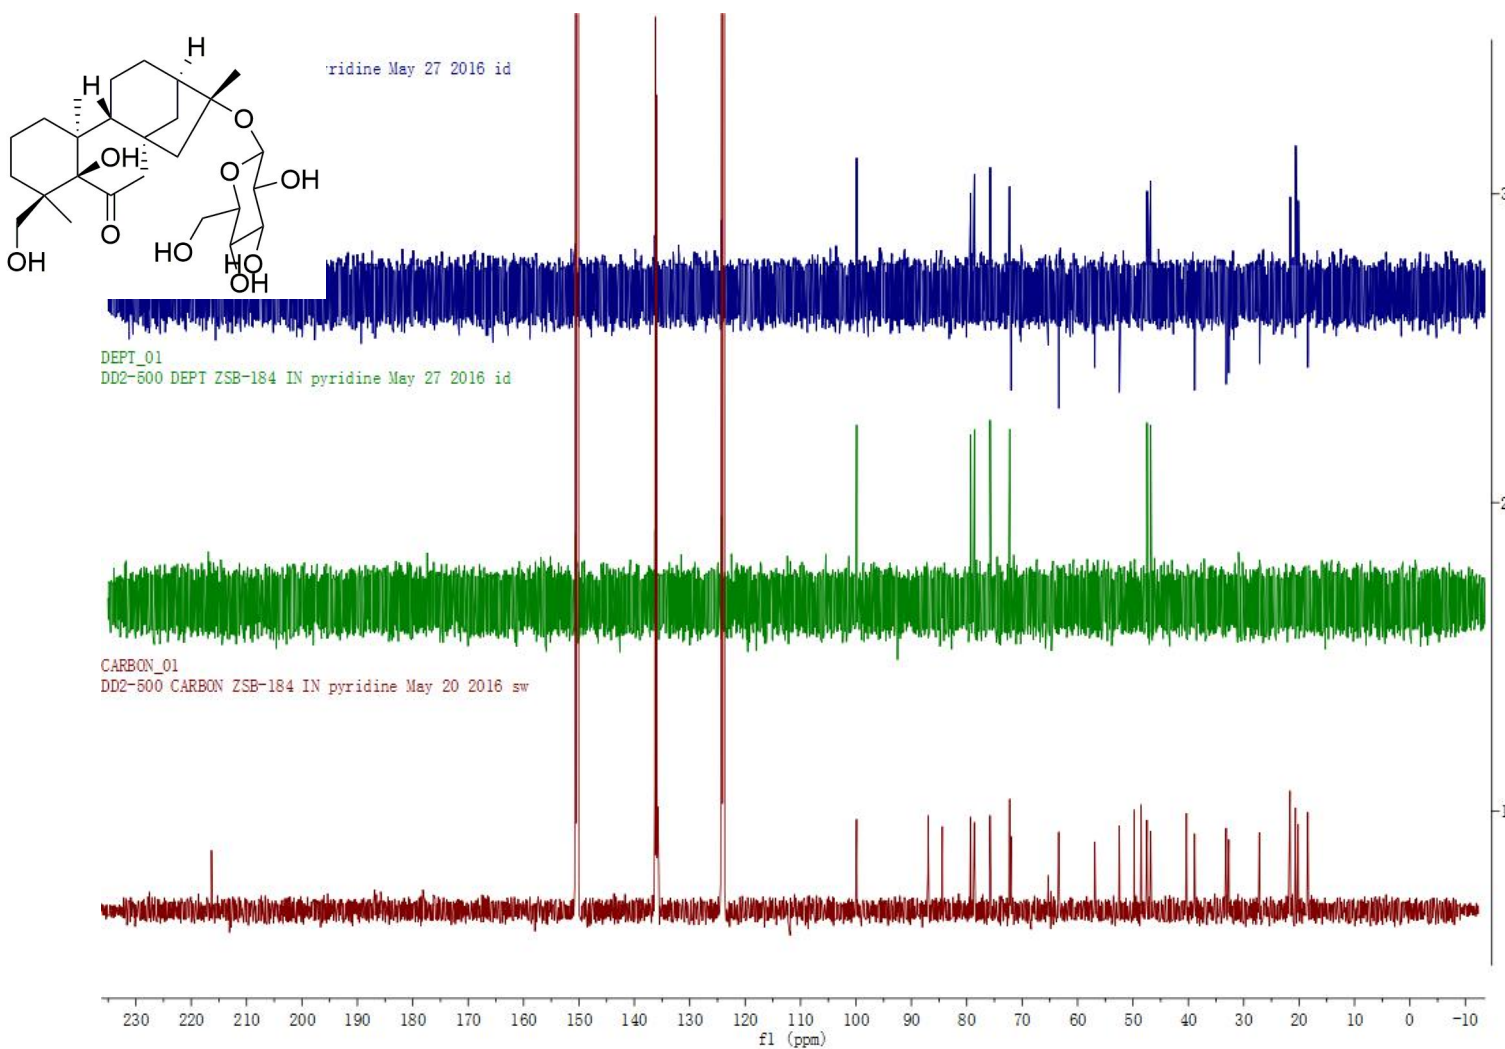

The DEPT spectrum of **14** in C<sub>5</sub>D<sub>5</sub>N (125 MHz)

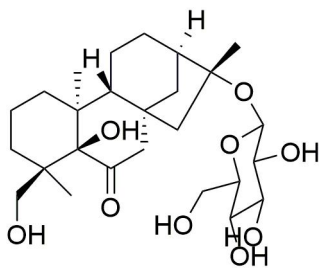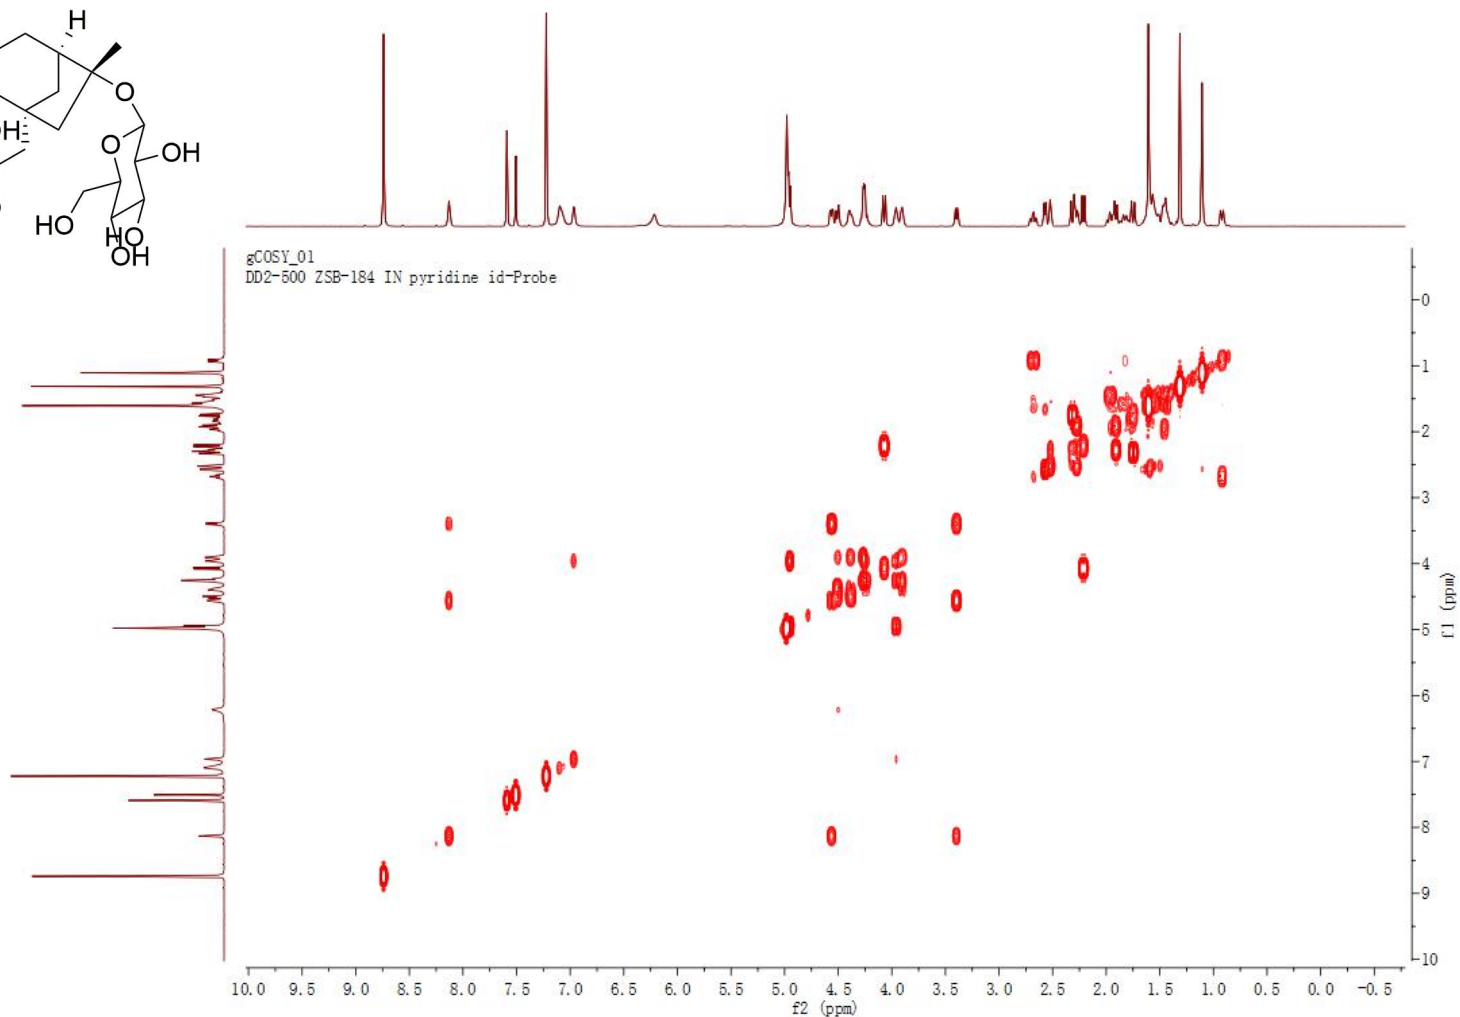

The COSY spectrum of **14** in C<sub>5</sub>D<sub>5</sub>N (500MHz)



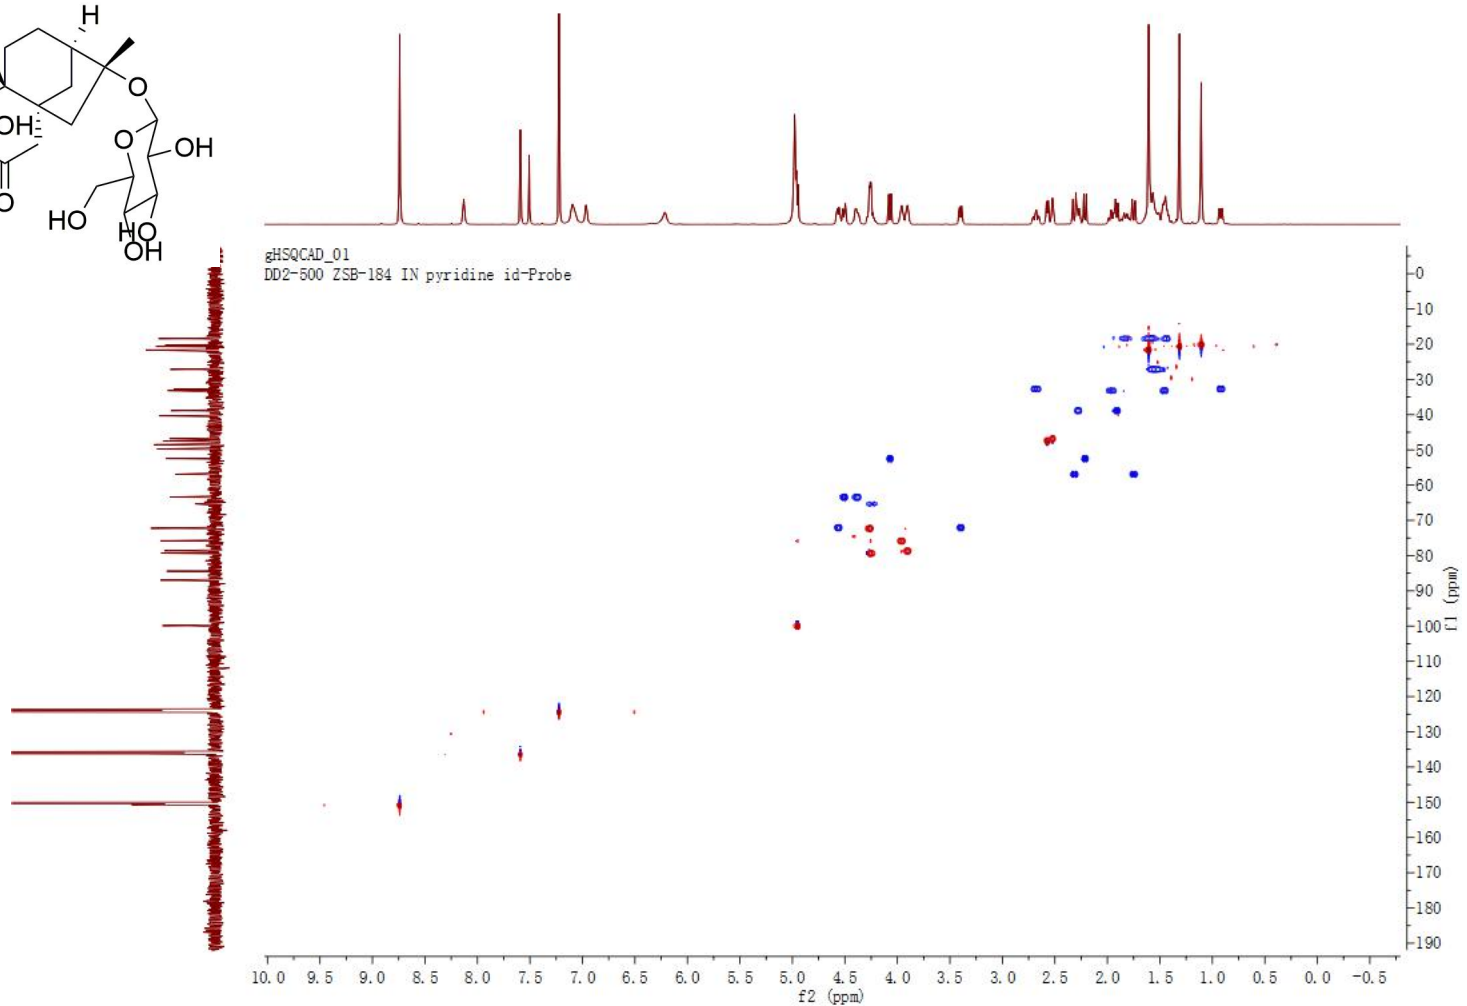

The HSQC spectrum of **14** in  $C_5D_5N$  ( $^1H$ : 500 MHz,  $^{13}C$ : 125 MHz)

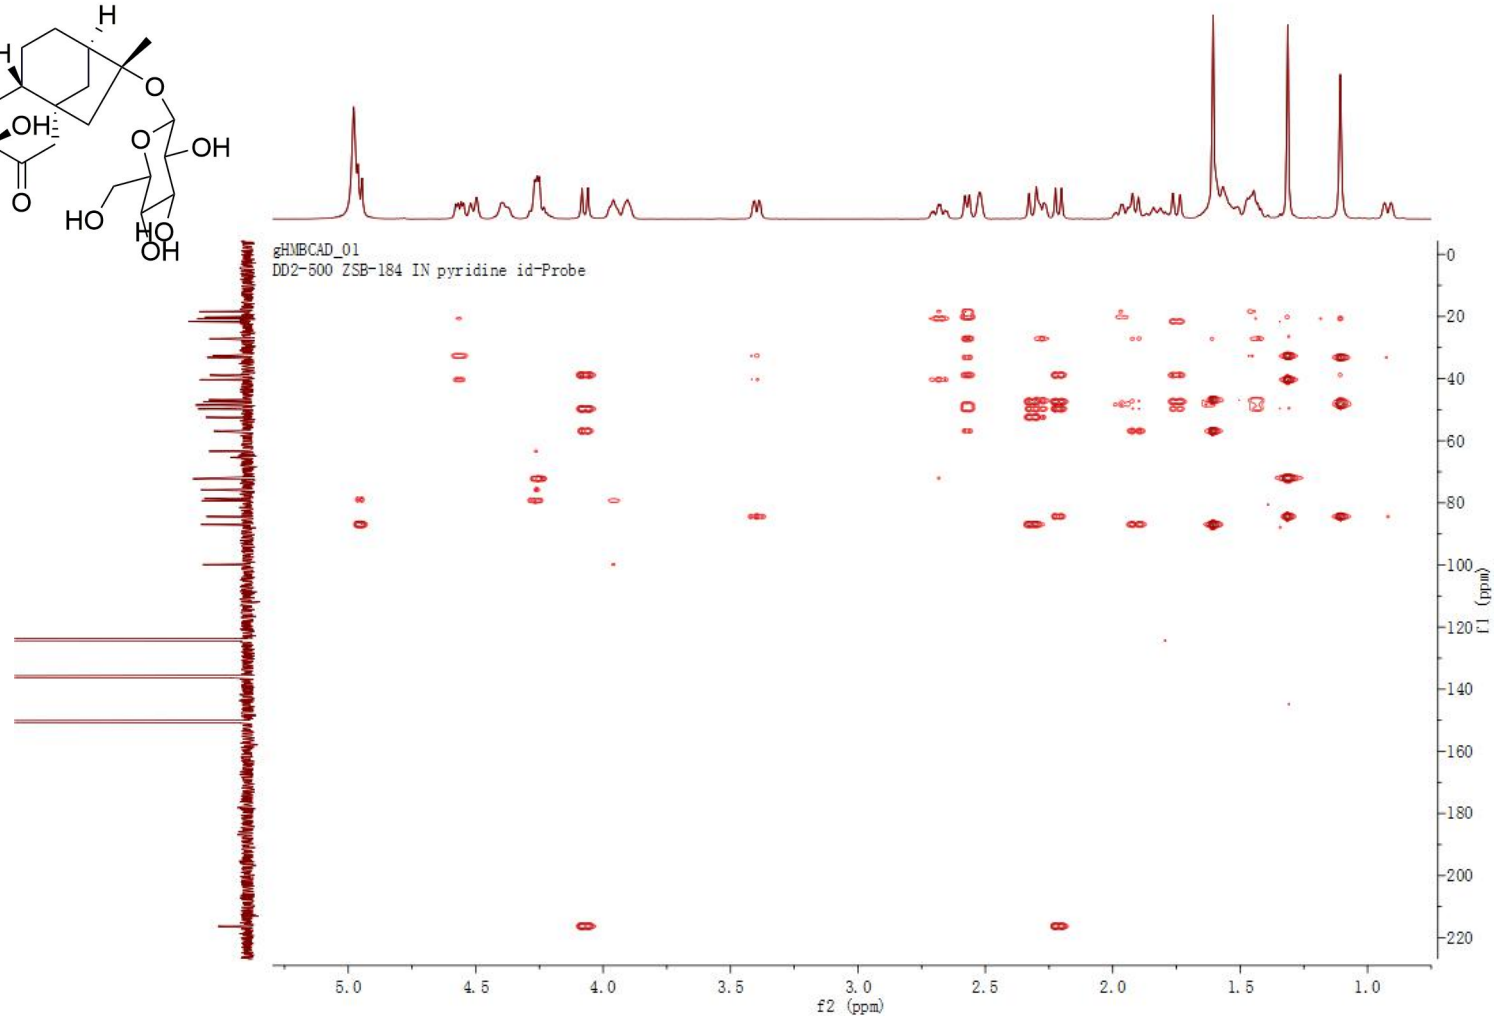

The HMBC spectrum of **14** in  $C_5D_5N$  ( $^1H$ : 500 MHz,  $^{13}C$ : 125 MHz)

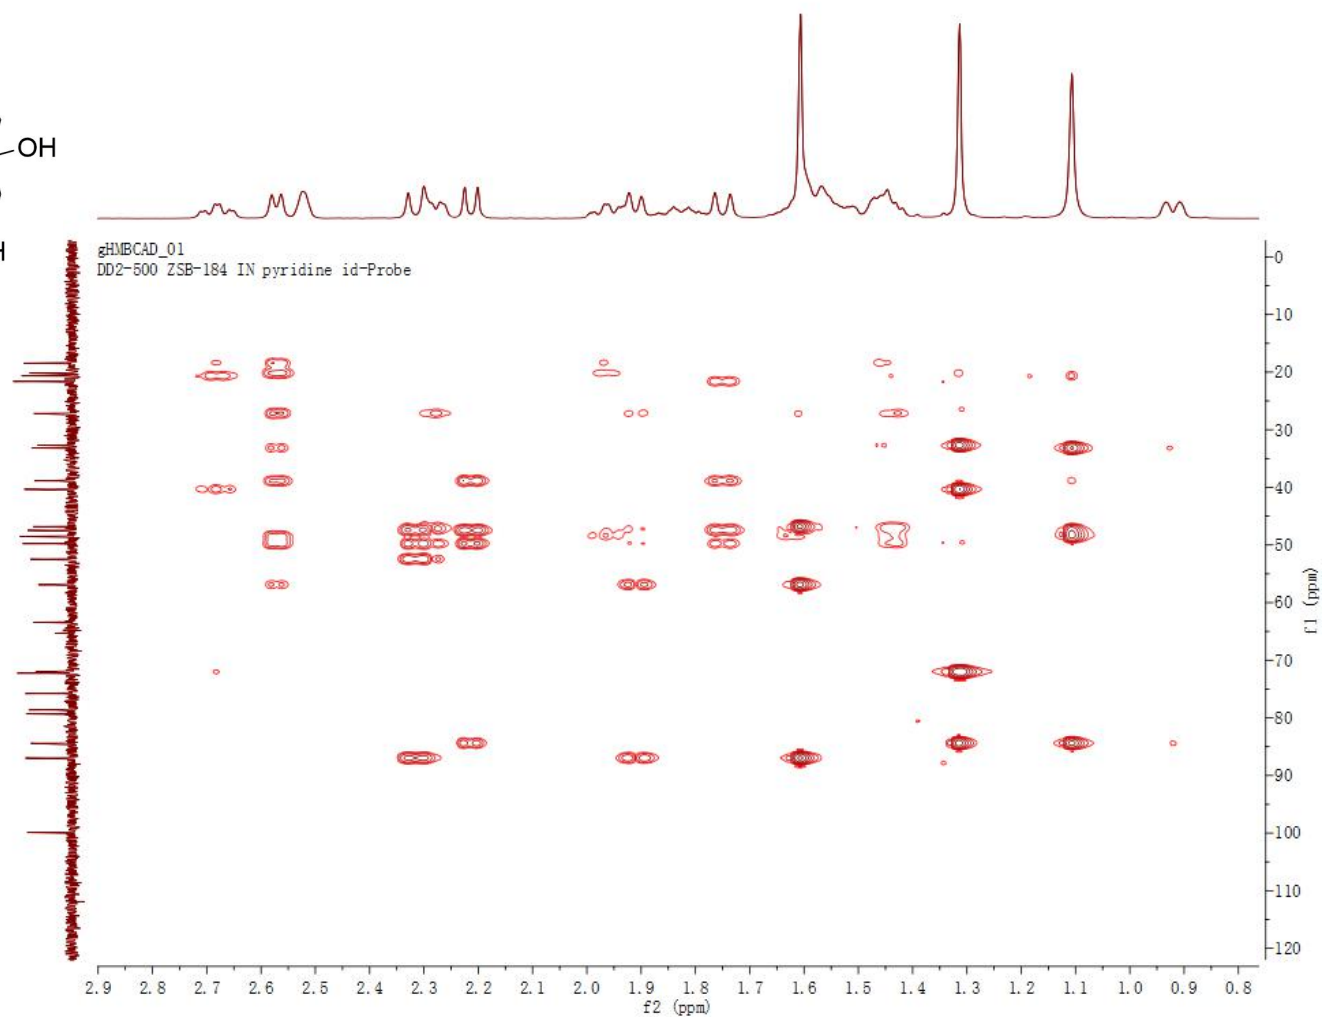

The HMBC spectrum (amplified) of **14** in  $\text{C}_5\text{D}_5\text{N}$  ( $^1\text{H}$ : 500 MHz,  $^{13}\text{C}$ : 125 MHz)

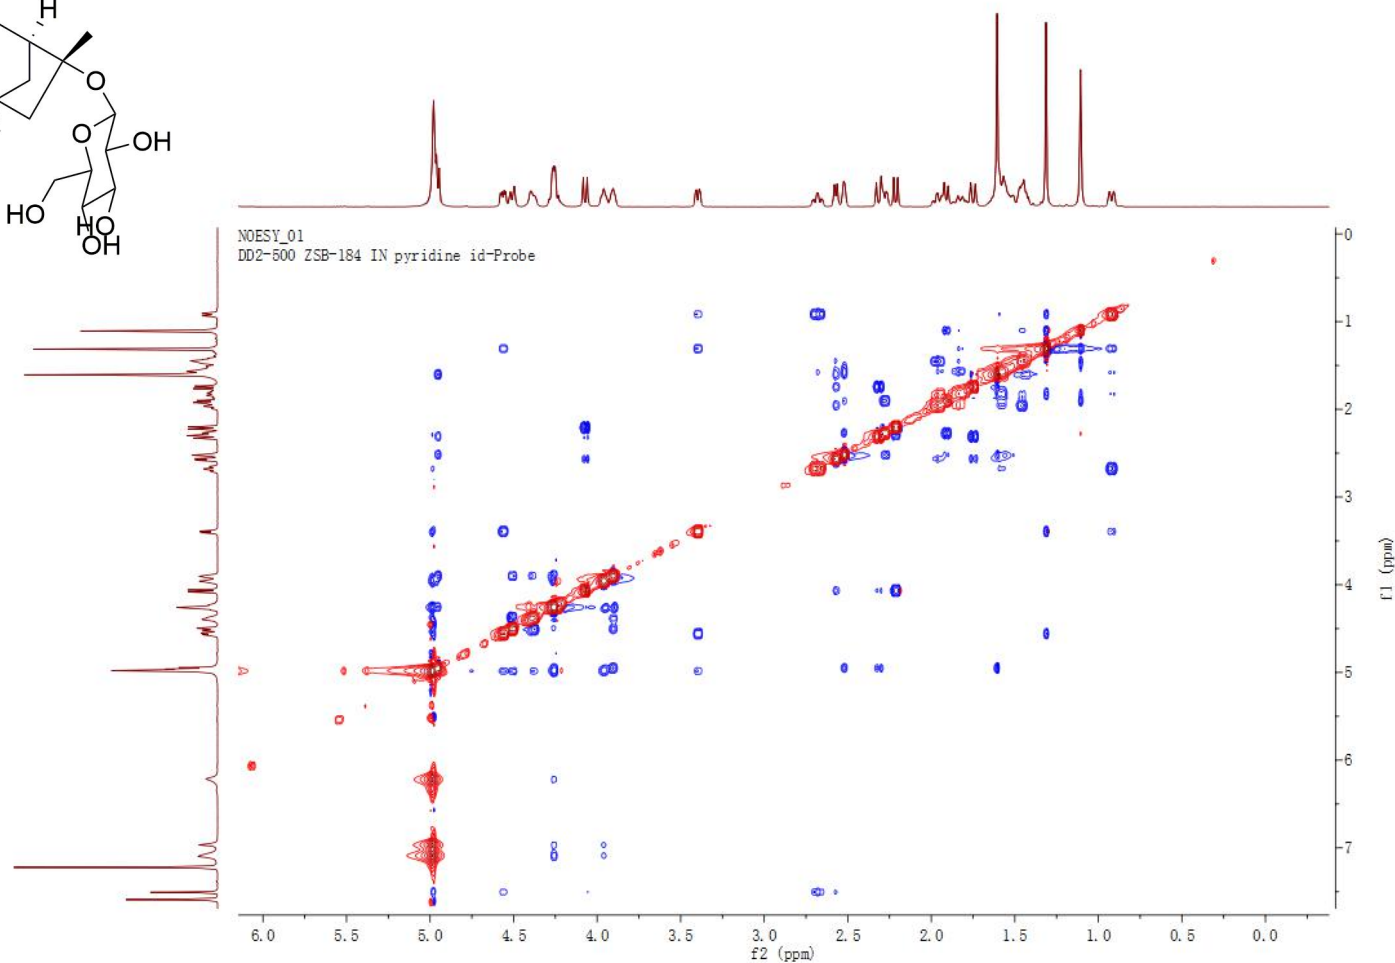

The NOESY spectrum of **14** in C<sub>5</sub>D<sub>5</sub>N (500MHz)

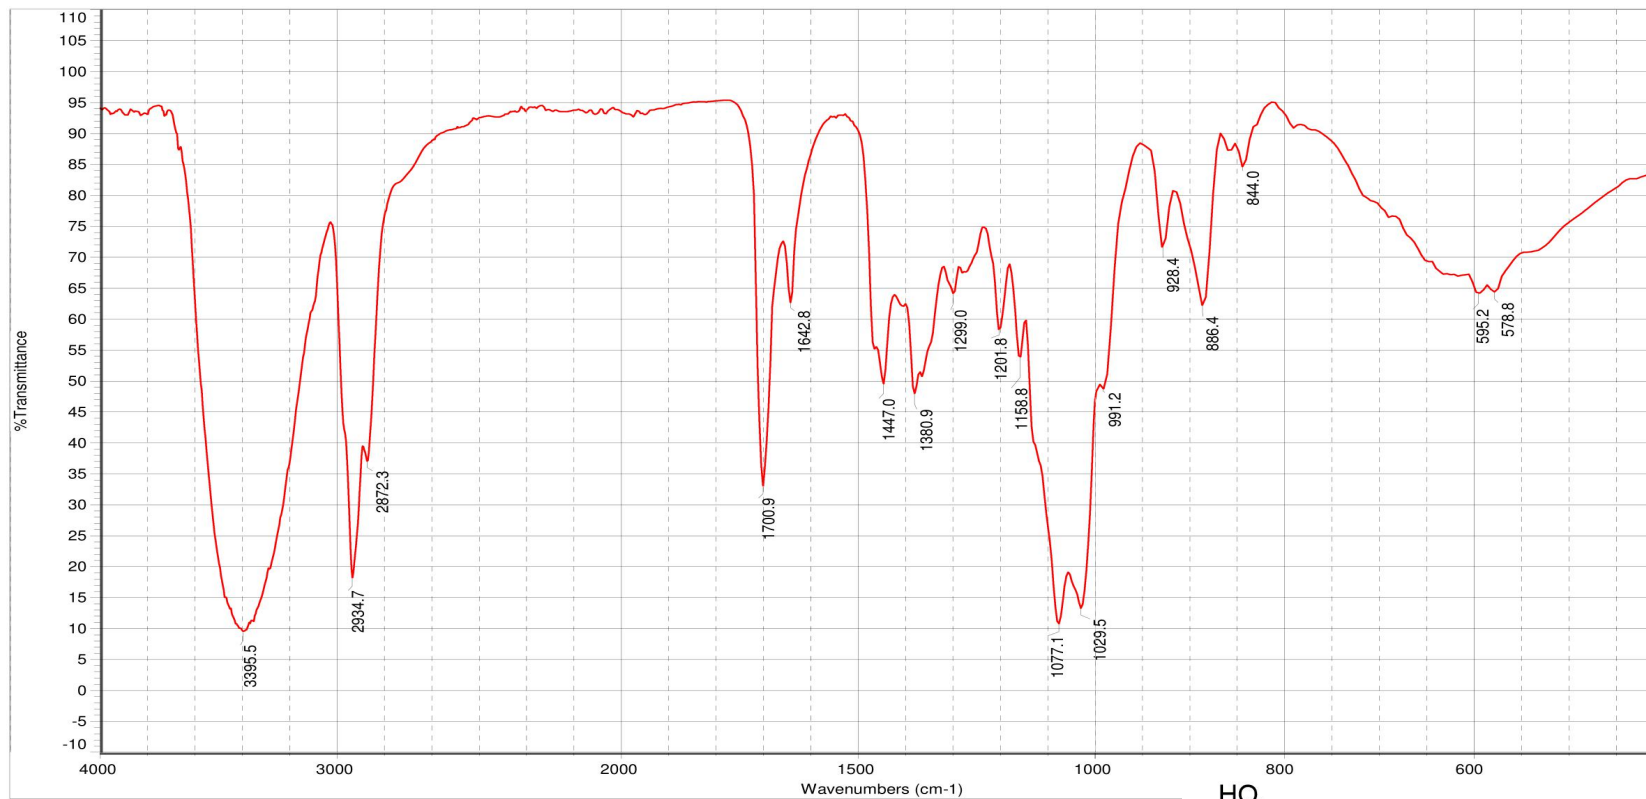

日期: 星期一 1月 16 10:16:27 2017 (GMT+08:00) Sample Name : ZSB - 52 (显微镜透射法 FT- IR Micro  
 扫描次数: 100 傅立叶变换显微镜红外 (FT-IR Microscope): Centaurus  
 分辨率: 8.000 美国热电公司 (Thermo) 傅立叶变换红外光谱仪: Nicolet 5700

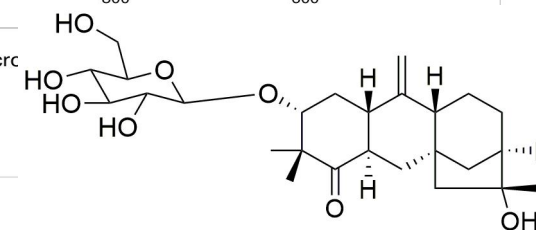

The IR spectrum of 15

MS Formula Results: + Scan (6.184 min) Sub (2015092903.d)

| m/z      | Ion                 | Formula                                          | Abundance |
|----------|---------------------|--------------------------------------------------|-----------|
| 503.2615 | (M+Na) <sup>+</sup> | C <sub>26</sub> H <sub>40</sub> NaO <sub>8</sub> | 2388776.3 |

  

| Best                                | Formula (M)                                                   | Ion Formula                                                     | Score | Cross Sco | Mass     | Calc Mass | Calc m/z | Diff (ppm) | Abs Diff (ppm) | Mass Match | Abund Match | Spacing Match | DBE |
|-------------------------------------|---------------------------------------------------------------|-----------------------------------------------------------------|-------|-----------|----------|-----------|----------|------------|----------------|------------|-------------|---------------|-----|
| <input checked="" type="checkbox"/> | C <sub>26</sub> H <sub>40</sub> O <sub>8</sub>                | C <sub>26</sub> H <sub>40</sub> NaO <sub>8</sub>                | 99.83 |           | 480.2723 | 480.2723  | 503.2615 | 0.05       | 0.05           | 100        | 99.53       | 99.85         | 7   |
| <input type="checkbox"/>            | C <sub>27</sub> H <sub>36</sub> N <sub>4</sub> O <sub>4</sub> | C <sub>27</sub> H <sub>36</sub> N <sub>4</sub> NaO <sub>4</sub> | 99.79 |           | 480.2723 | 480.2737  | 503.2629 | 2.82       | 2.82           | 99.75      | 99.89       | 99.76         | 12  |
| <input type="checkbox"/>            | C <sub>22</sub> H <sub>36</sub> N <sub>6</sub> O <sub>6</sub> | C <sub>22</sub> H <sub>36</sub> N <sub>6</sub> NaO <sub>6</sub> | 98.95 |           | 480.2723 | 480.2696  | 503.2589 | -5.57      | 5.57           | 99.03      | 98.22       | 99.67         | 8   |

page 1

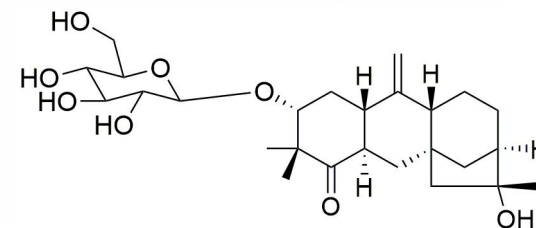

The HRESIMS spectrum of **15**

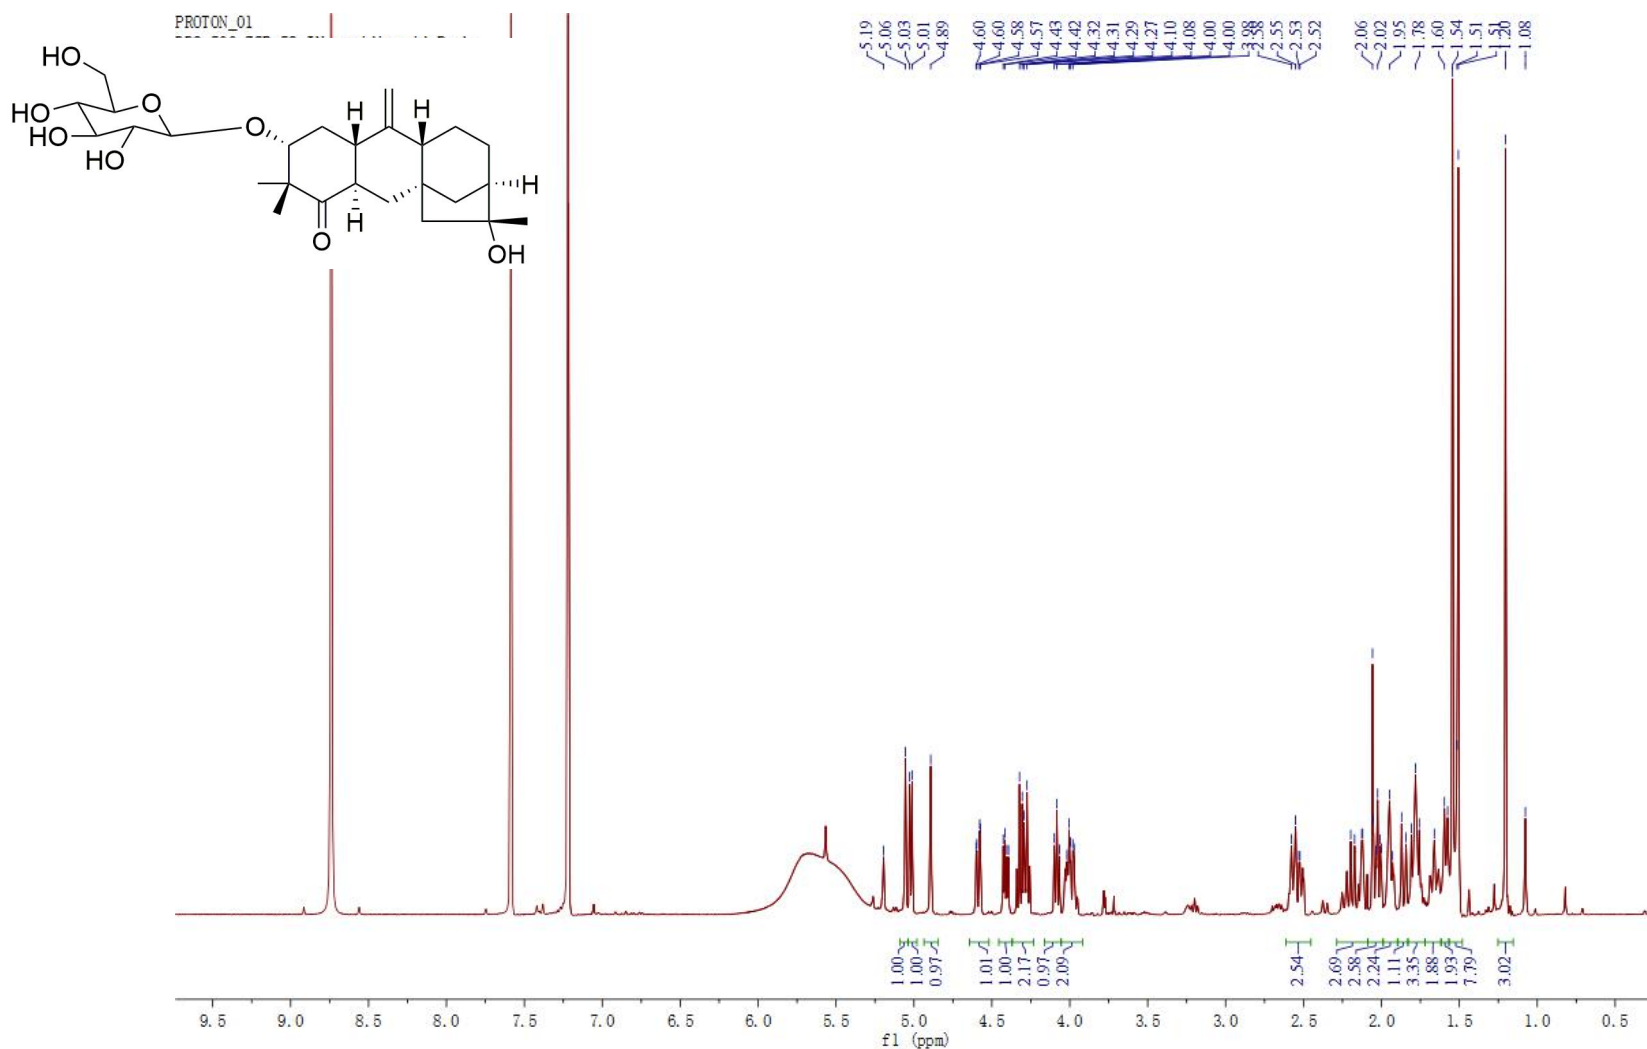

The  $^1\text{H}$  NMR spectrum of **15** in  $\text{C}_5\text{D}_5\text{N}$  (500 MHz)

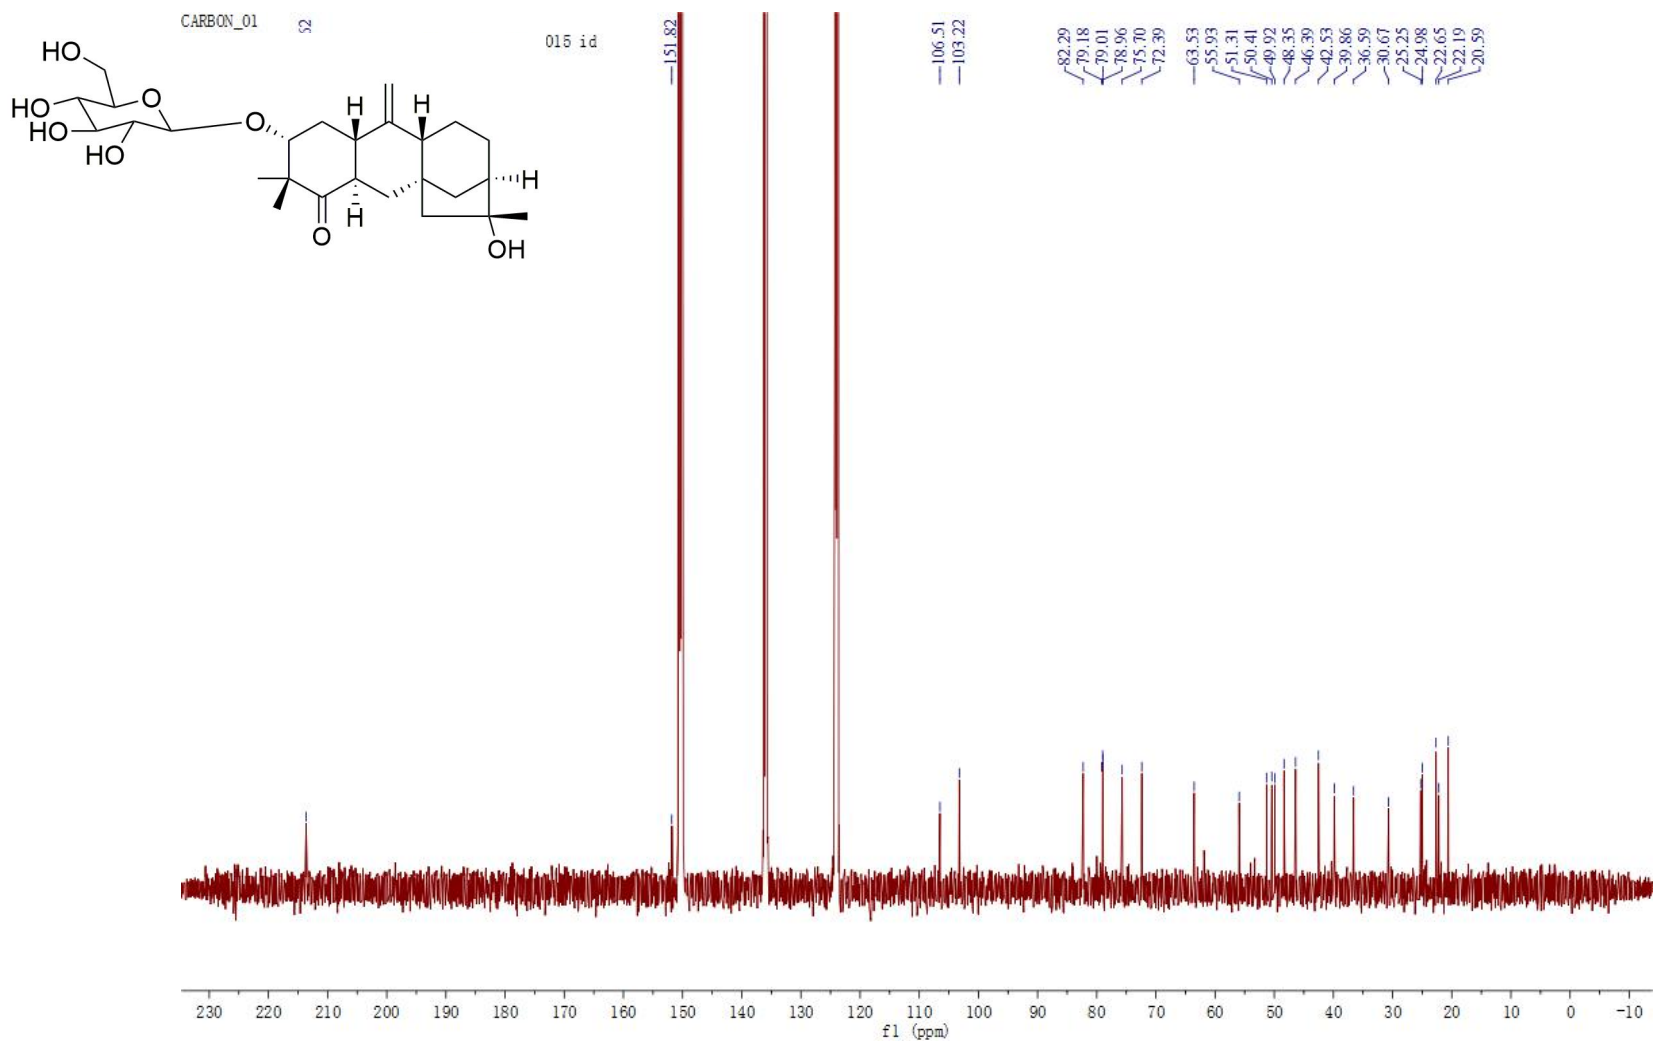

The  $^{13}\text{C}$  NMR spectrum of **15** in  $\text{C}_5\text{D}_5\text{N}$  (125 MHz)



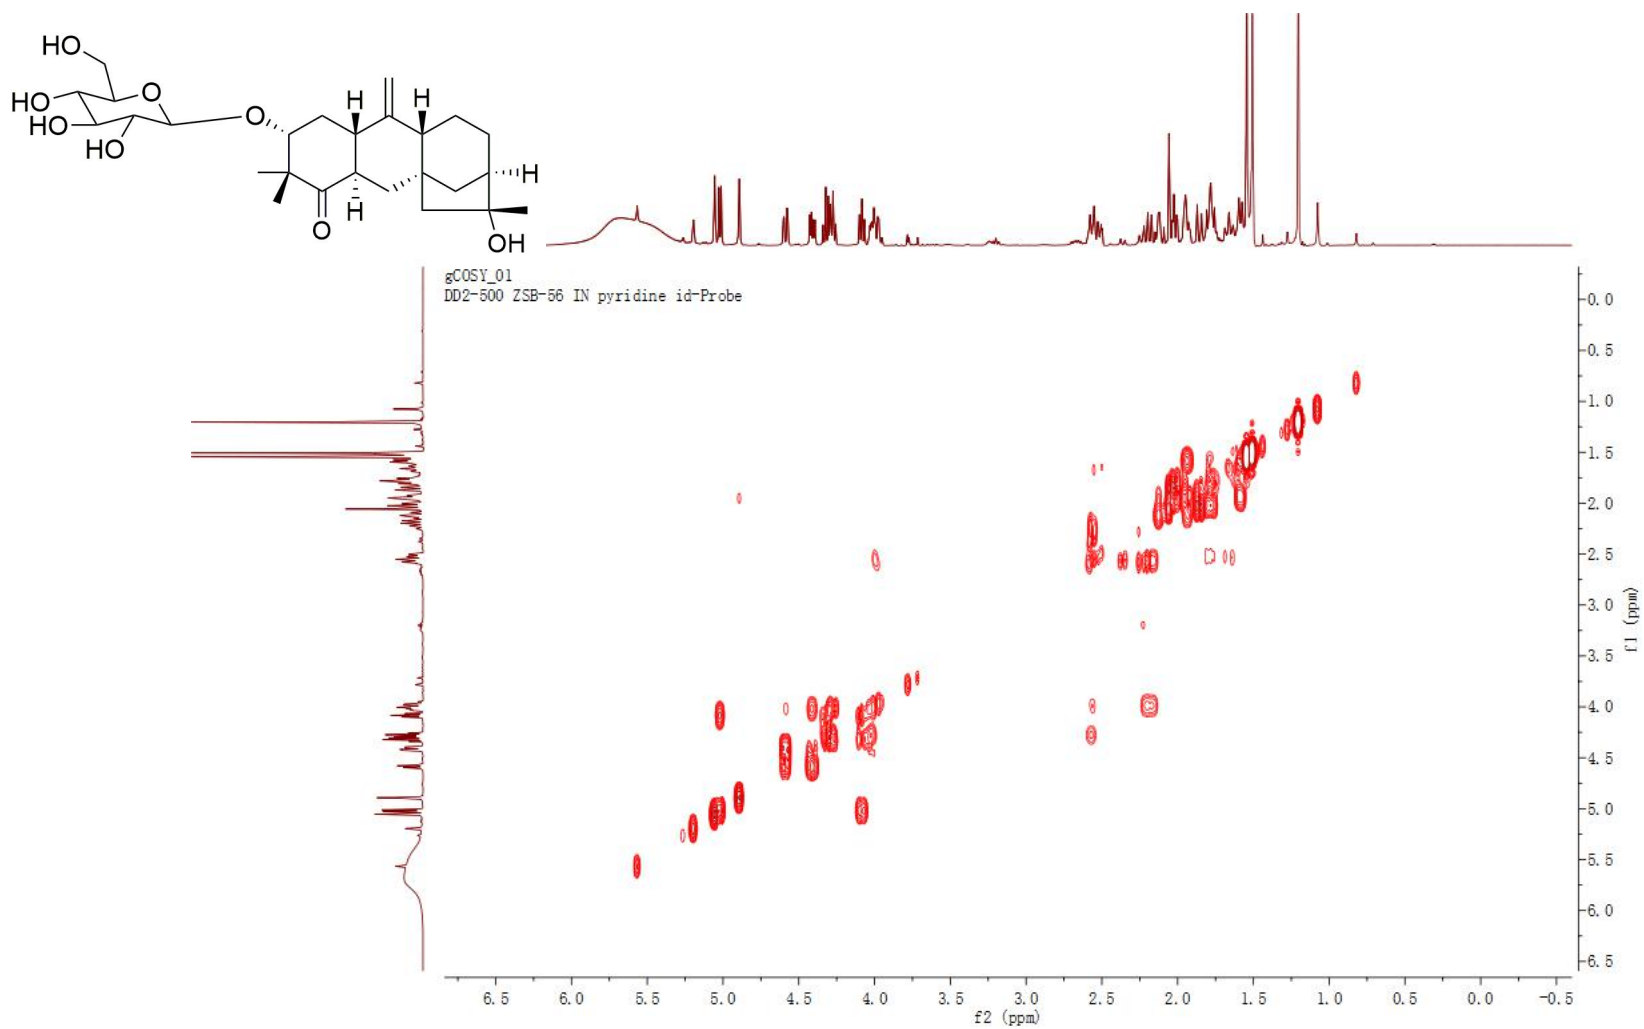

The COSY spectrum of **15** in C<sub>5</sub>D<sub>5</sub>N (500 MHz)

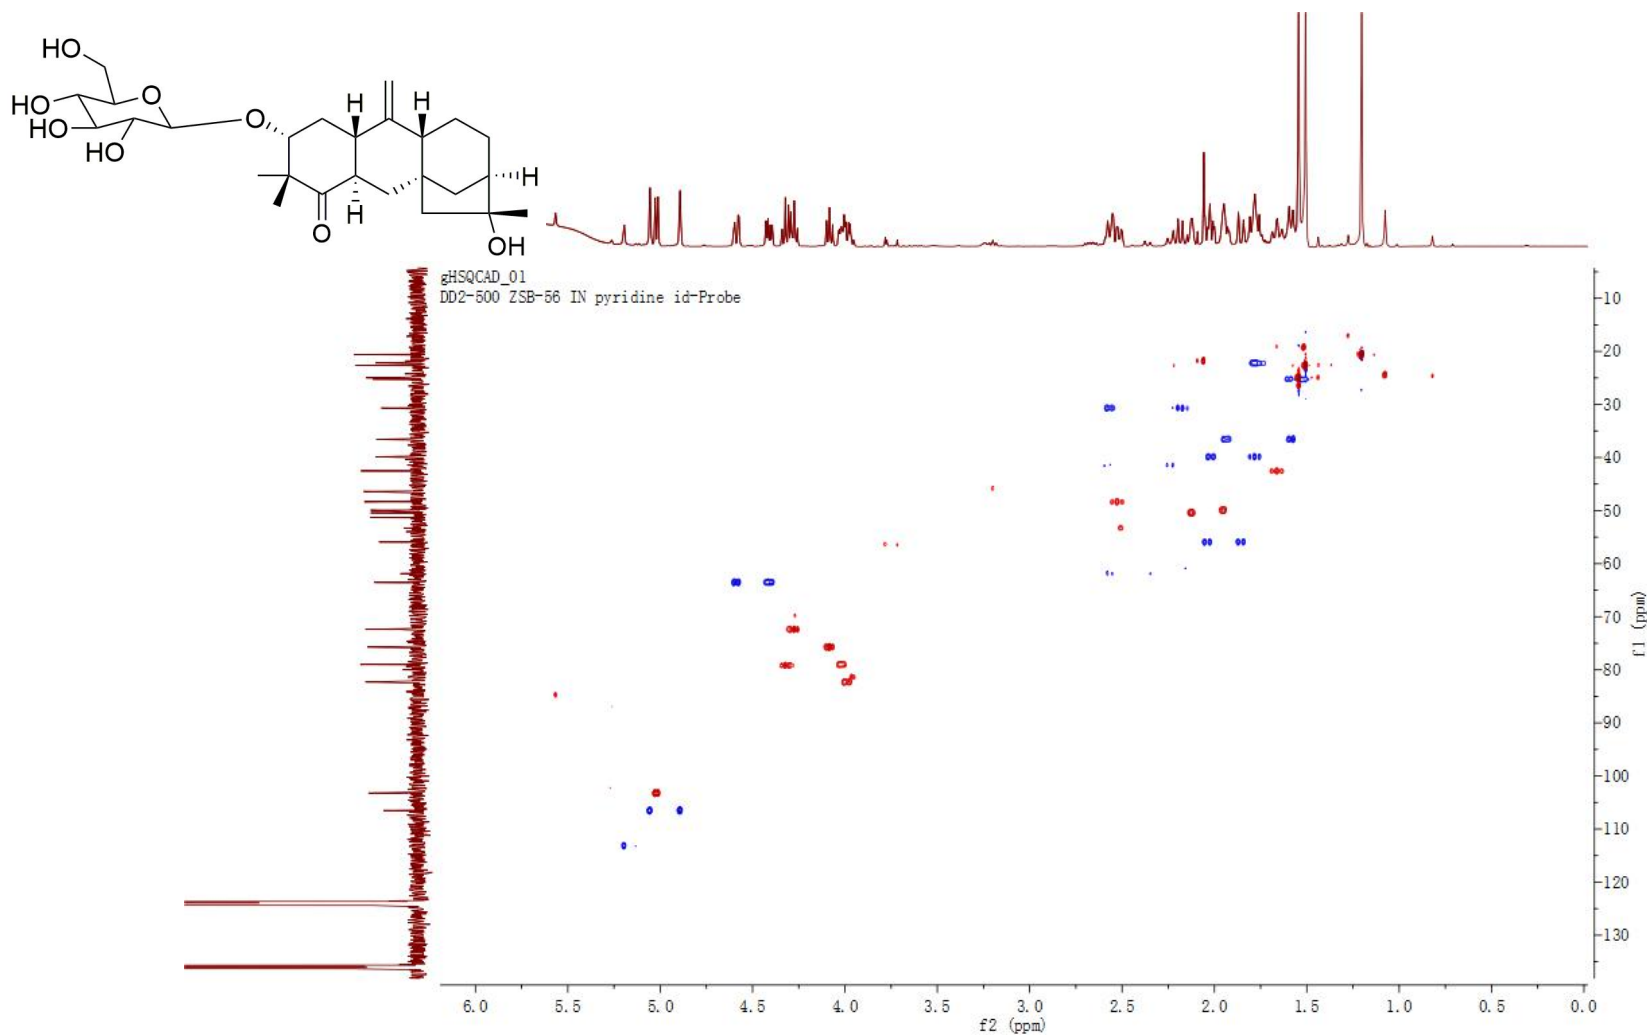

The HSQC spectrum of **15** in  $\text{C}_5\text{D}_5\text{N}$  ( $^1\text{H}$ : 500 MHz,  $^{13}\text{C}$ : 125 MHz)

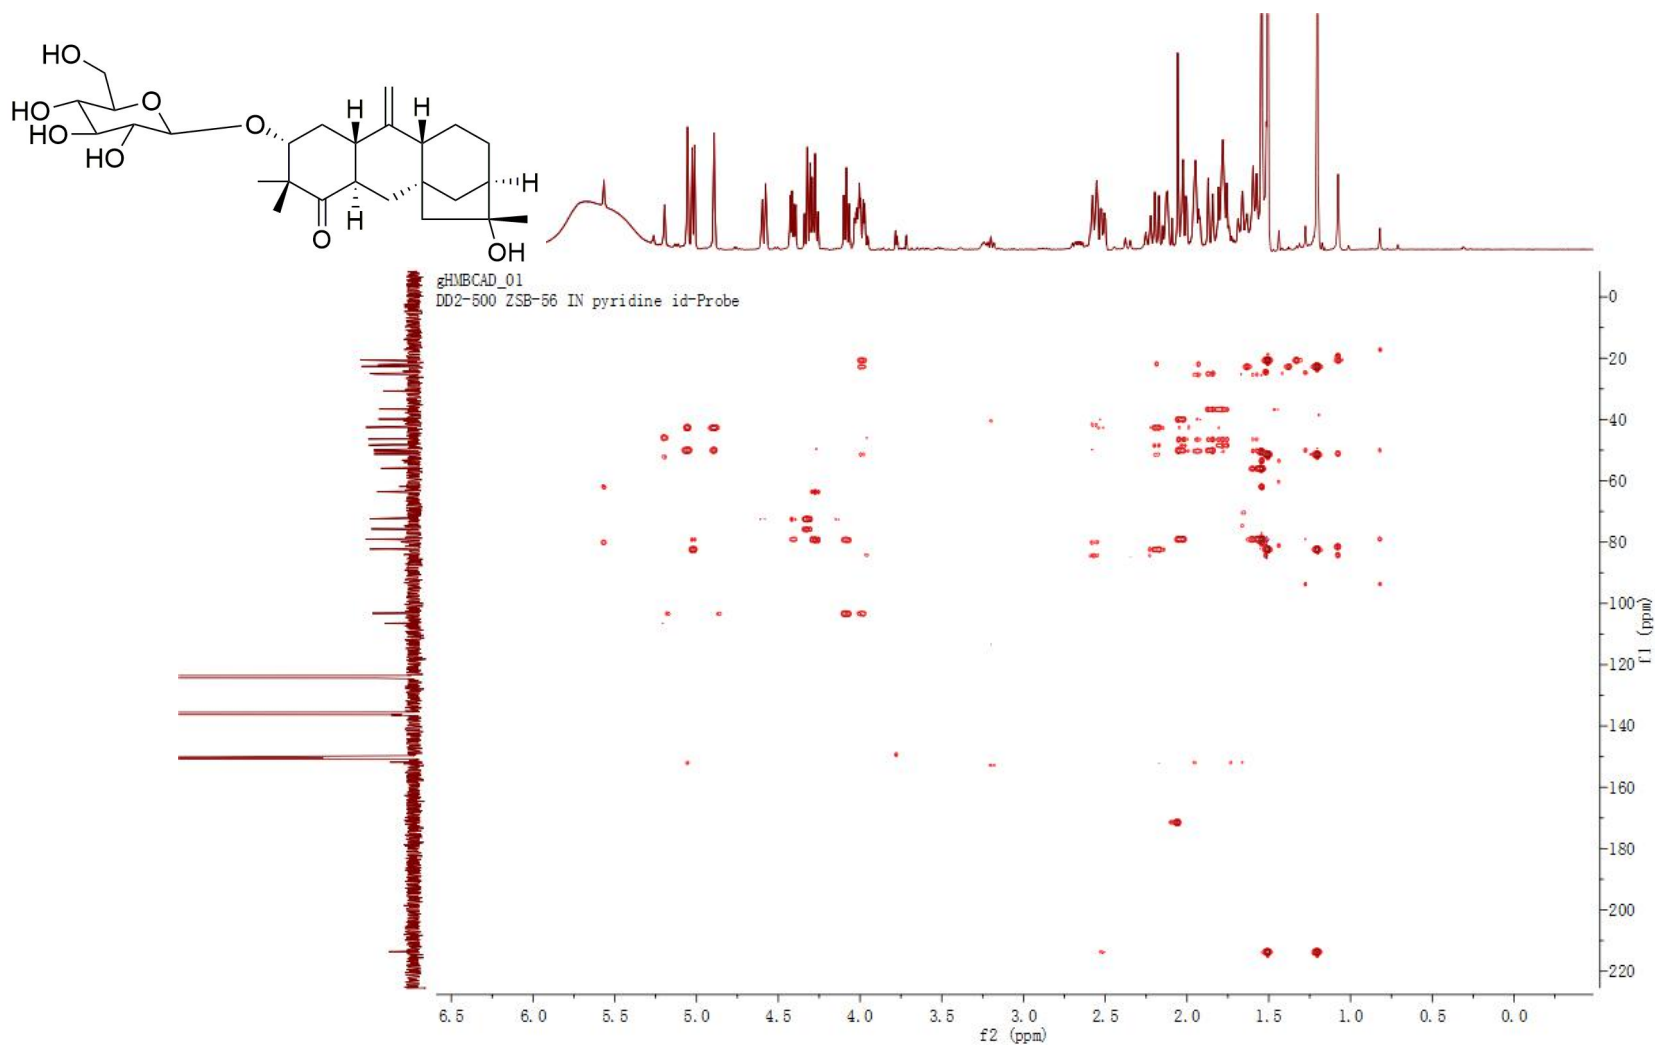

The HMBC spectrum of **15** in  $\text{C}_5\text{D}_5\text{N}$  ( $^1\text{H}$ : 500 MHz,  $^{13}\text{C}$ : 125MHz)

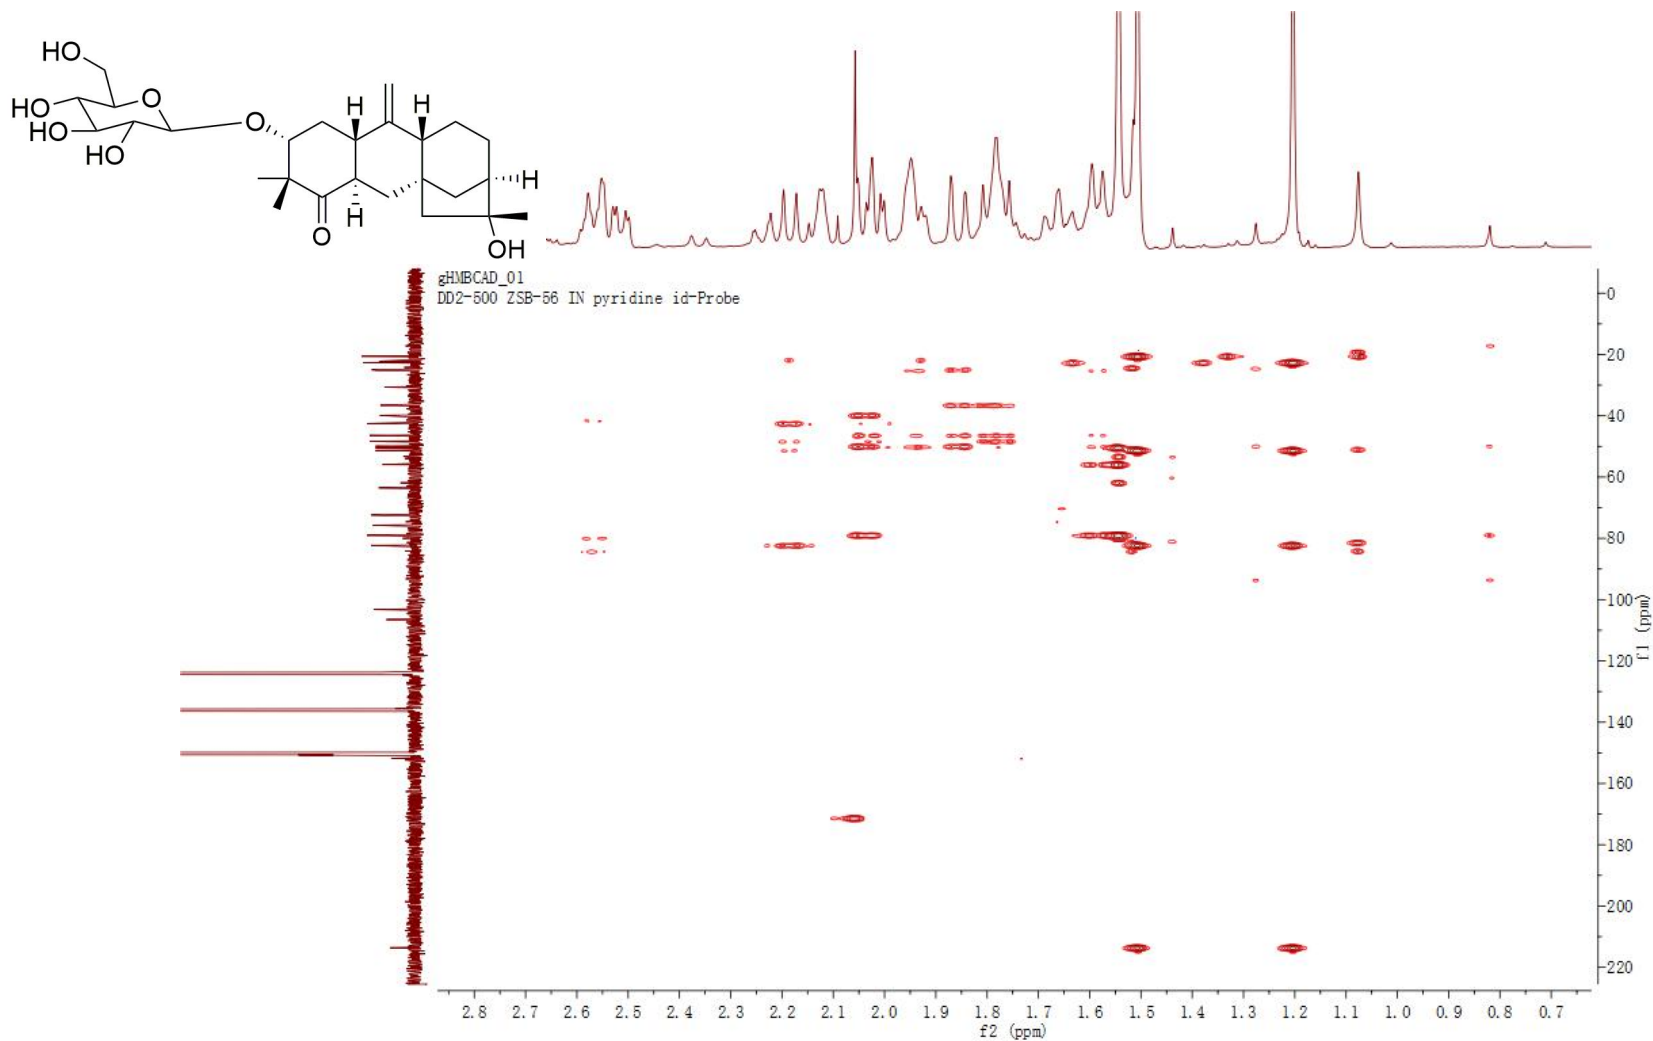

The HMBC spectrum (amplified) of **15** in  $\text{C}_5\text{D}_5\text{N}$  ( $^1\text{H}$ : 500 MHz,  $^{13}\text{C}$ : 125 MHz)

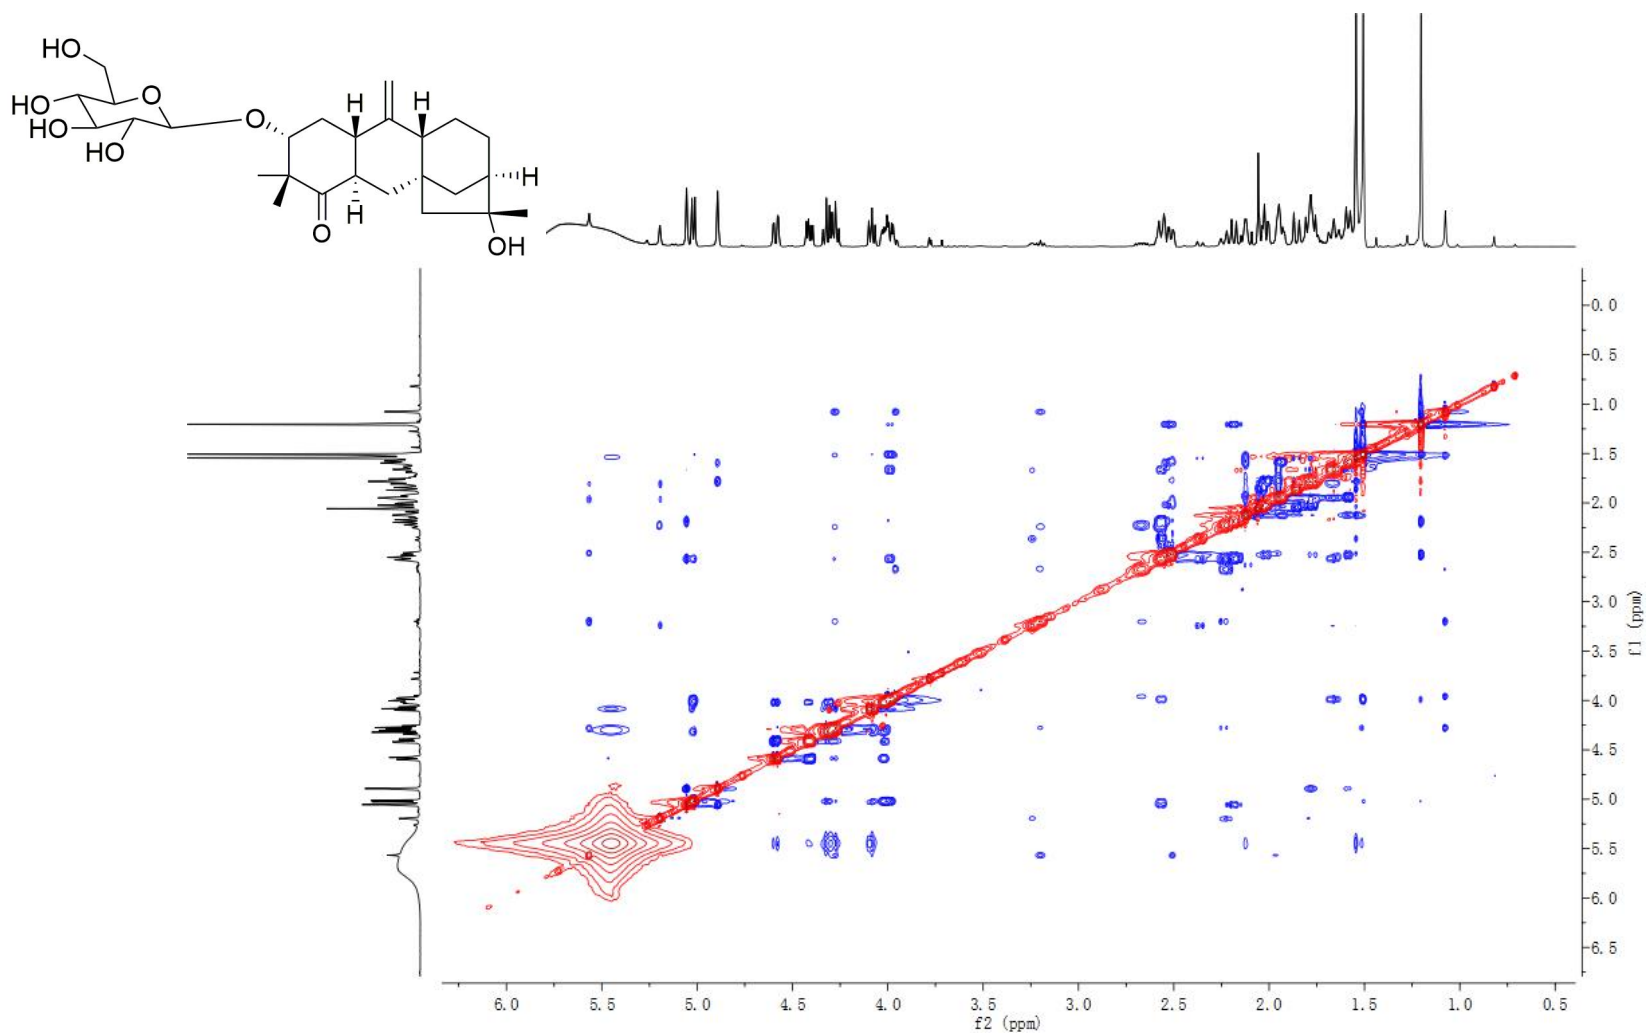

The NOESY spectrum of **15** in C<sub>5</sub>D<sub>5</sub>N (500 MHz)

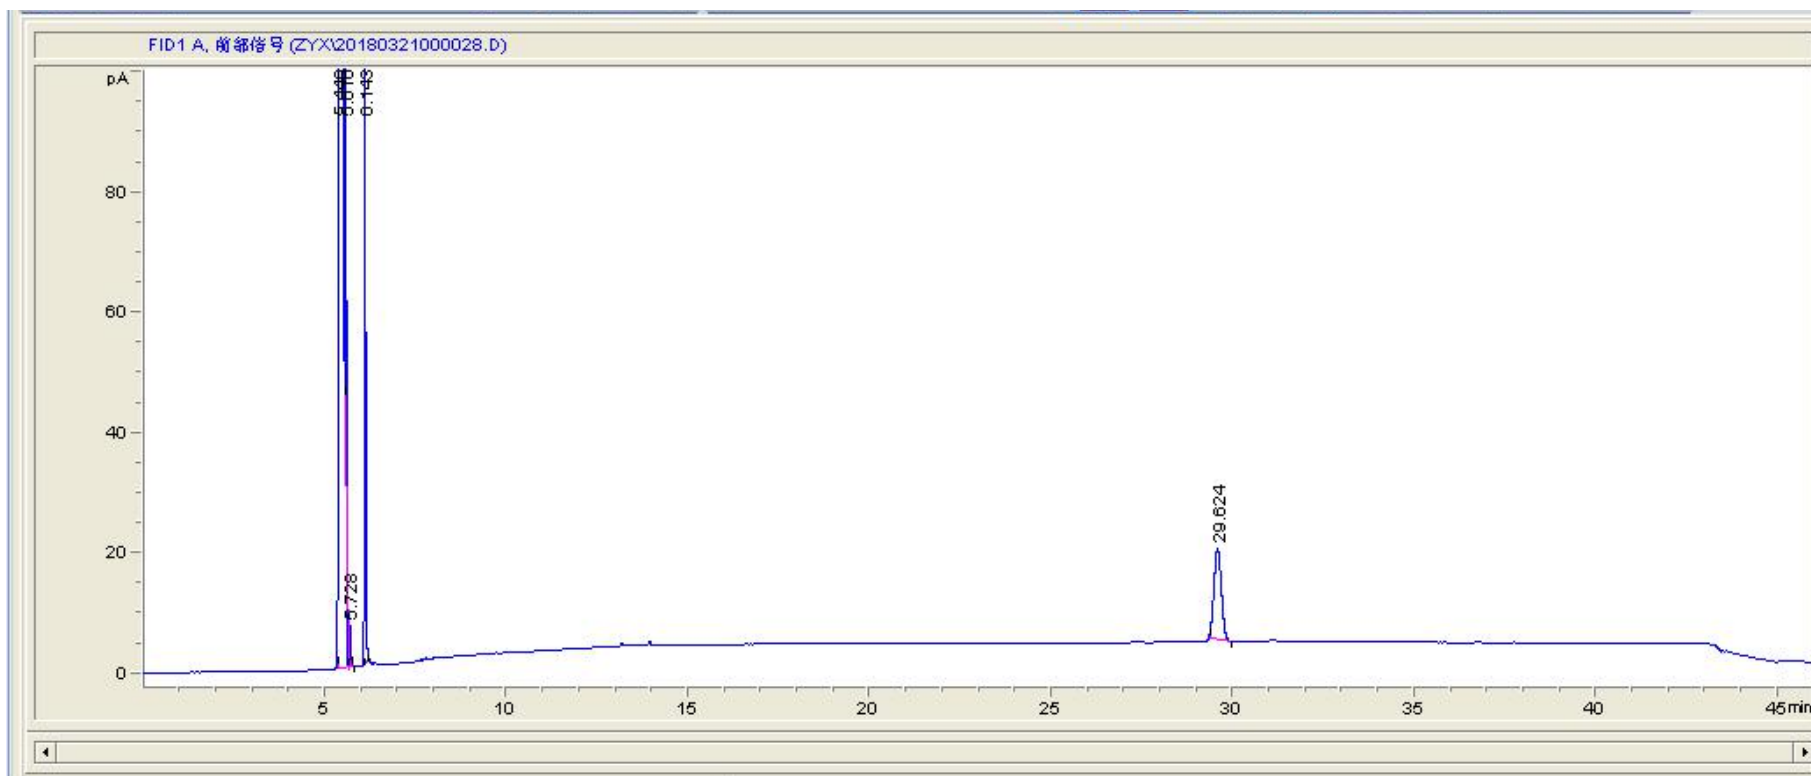

GC analysis of the standard D-glucose

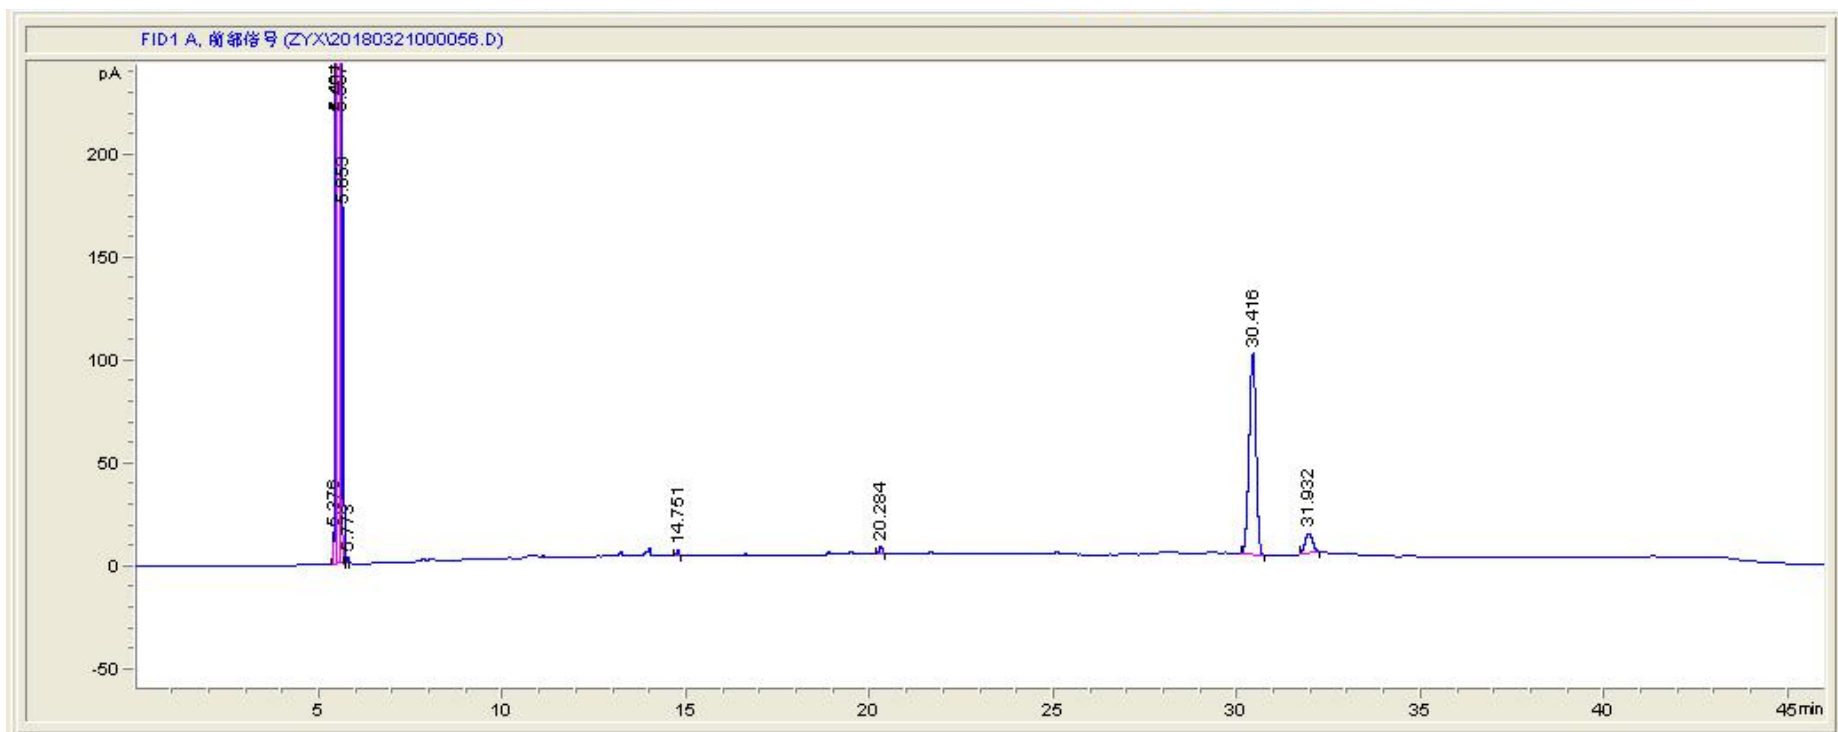

GC analysis of the standard L-glucose

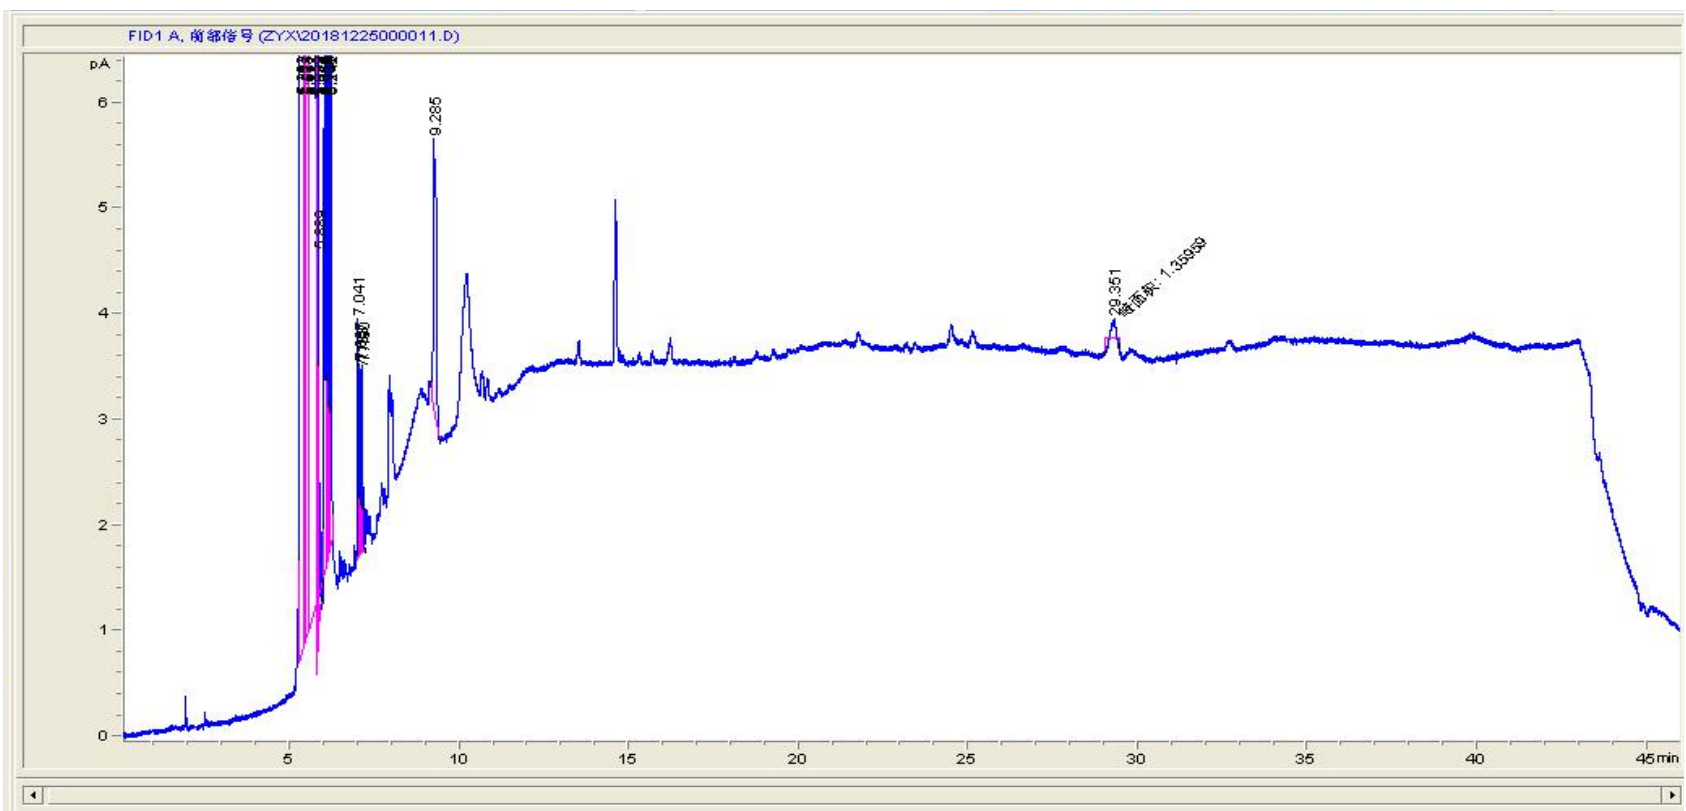

GC analysis of the sugar moiety of **1**



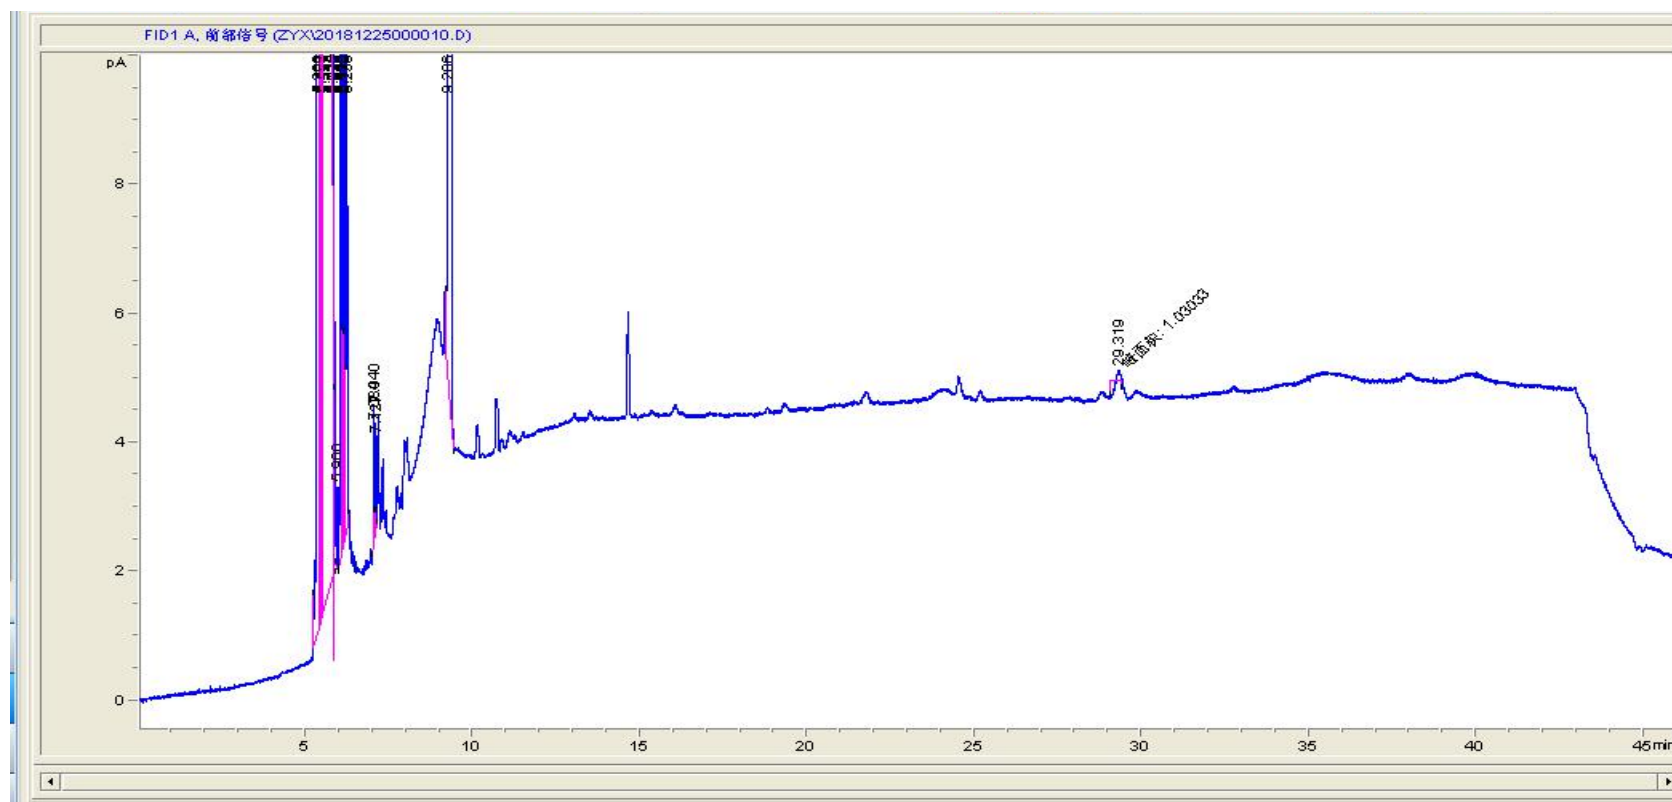

GC analysis of the sugar moiety of **2**

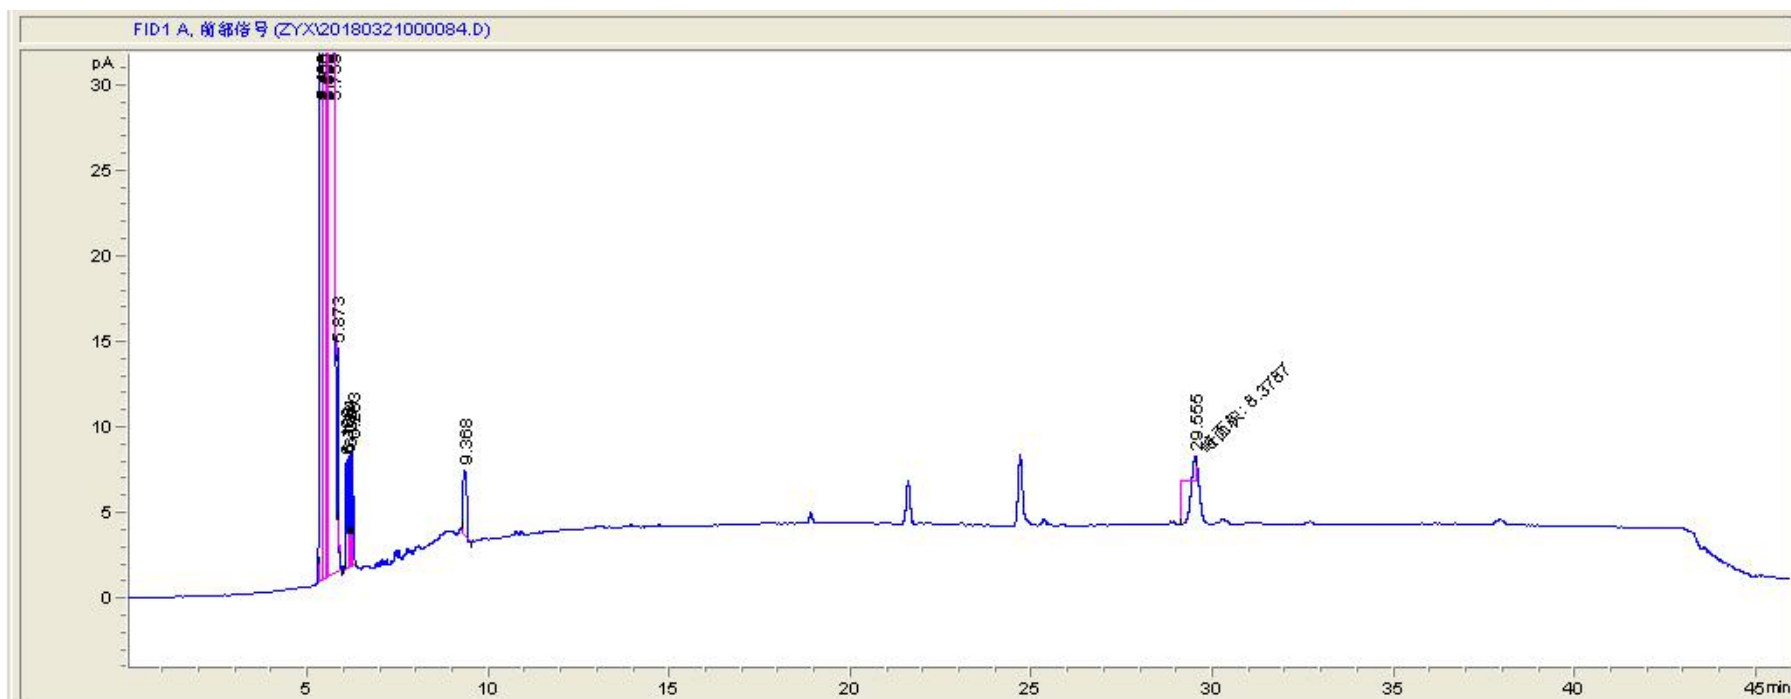

GC analysis of the sugar moiety of **3**

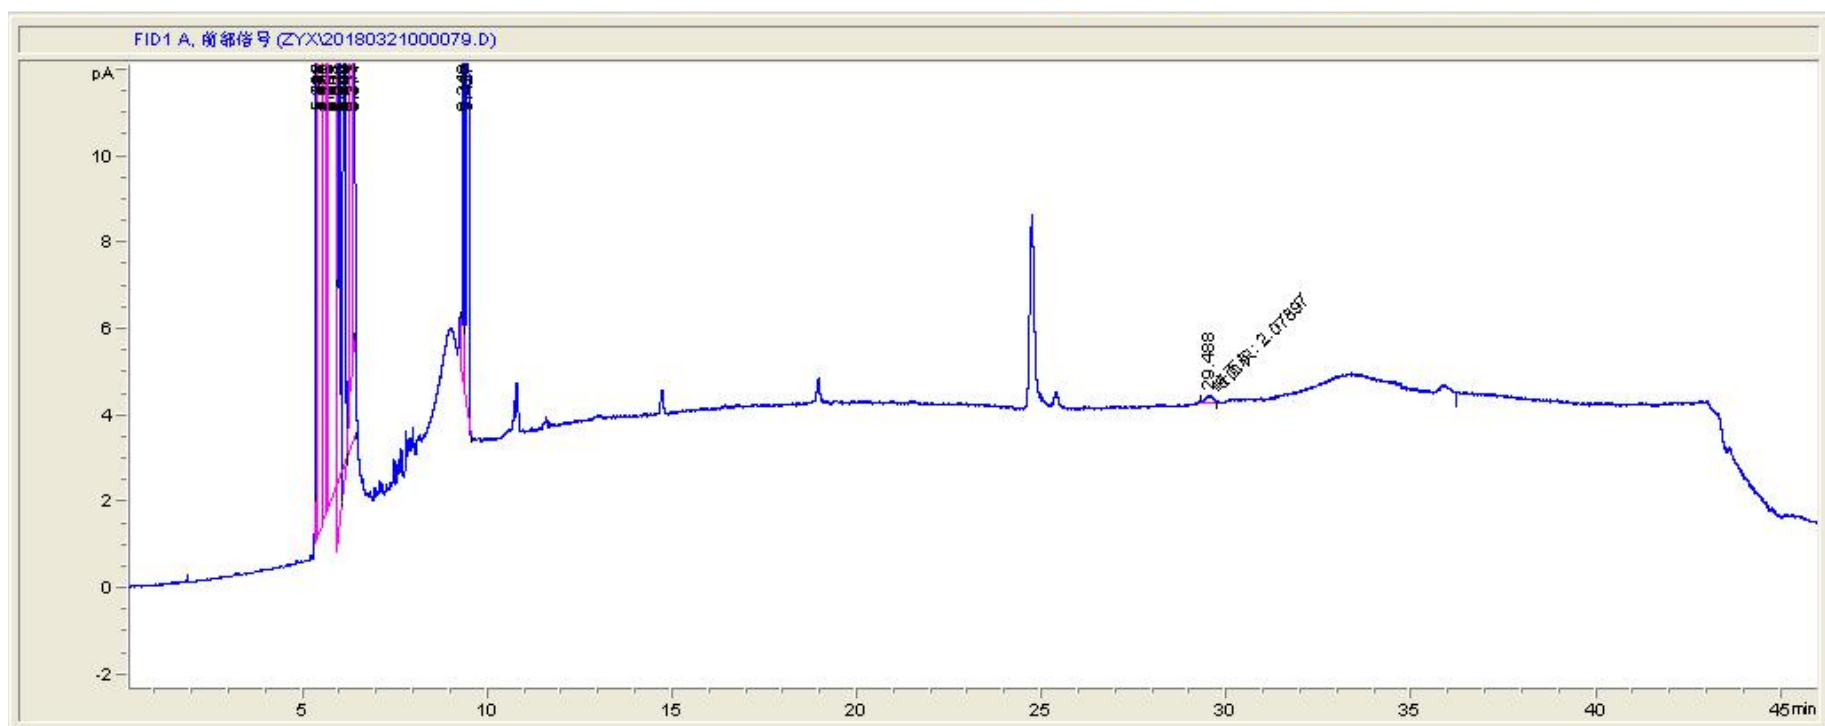

GC analysis of the sugar moiety of 4

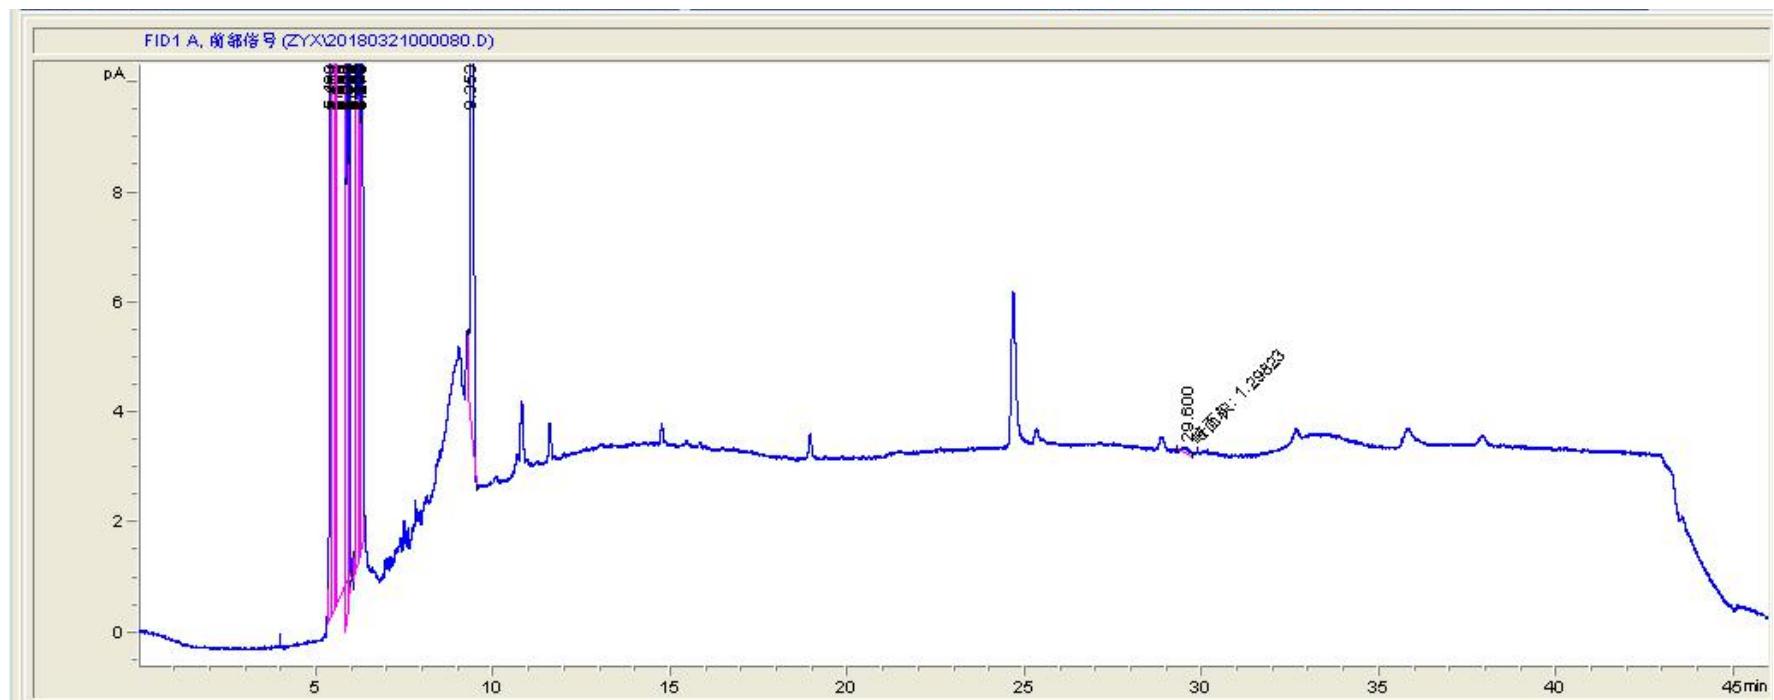

GC analysis of the sugar moiety of **5**

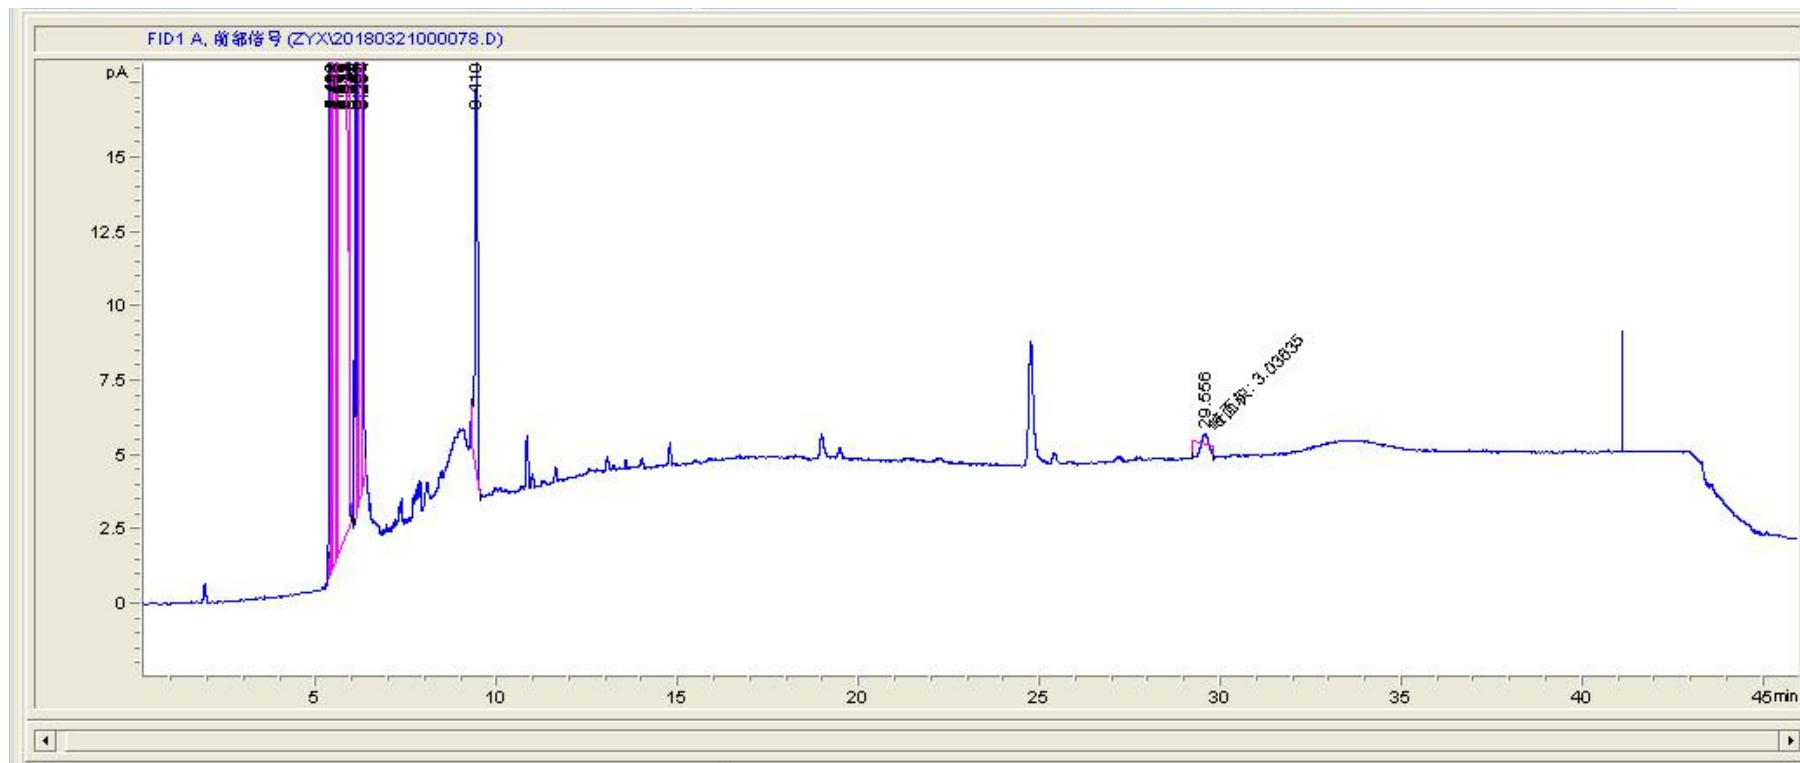

GC analysis of the sugar moiety of 6

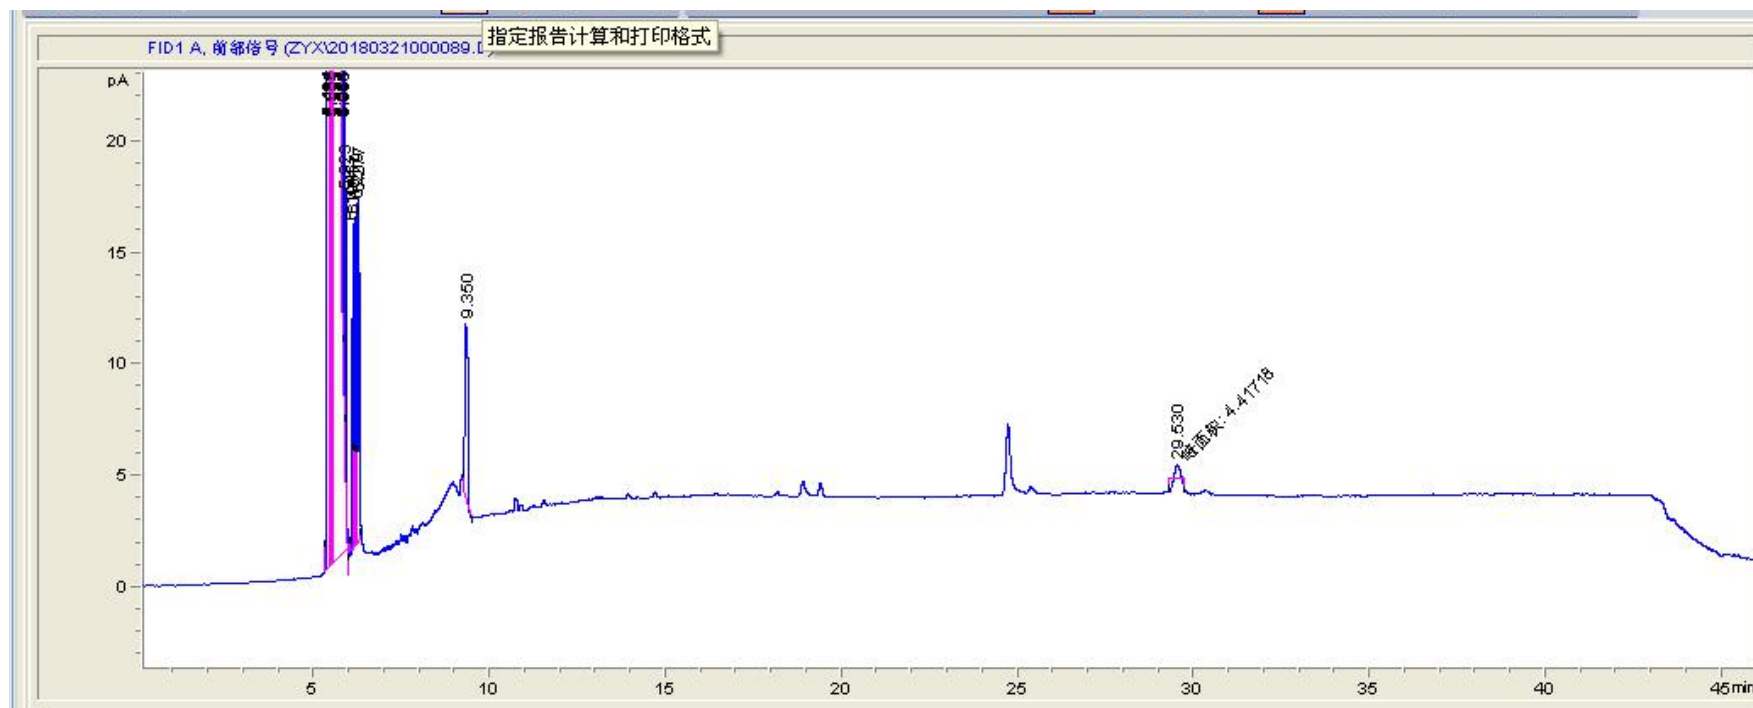

GC analysis of the sugar moiety of 9

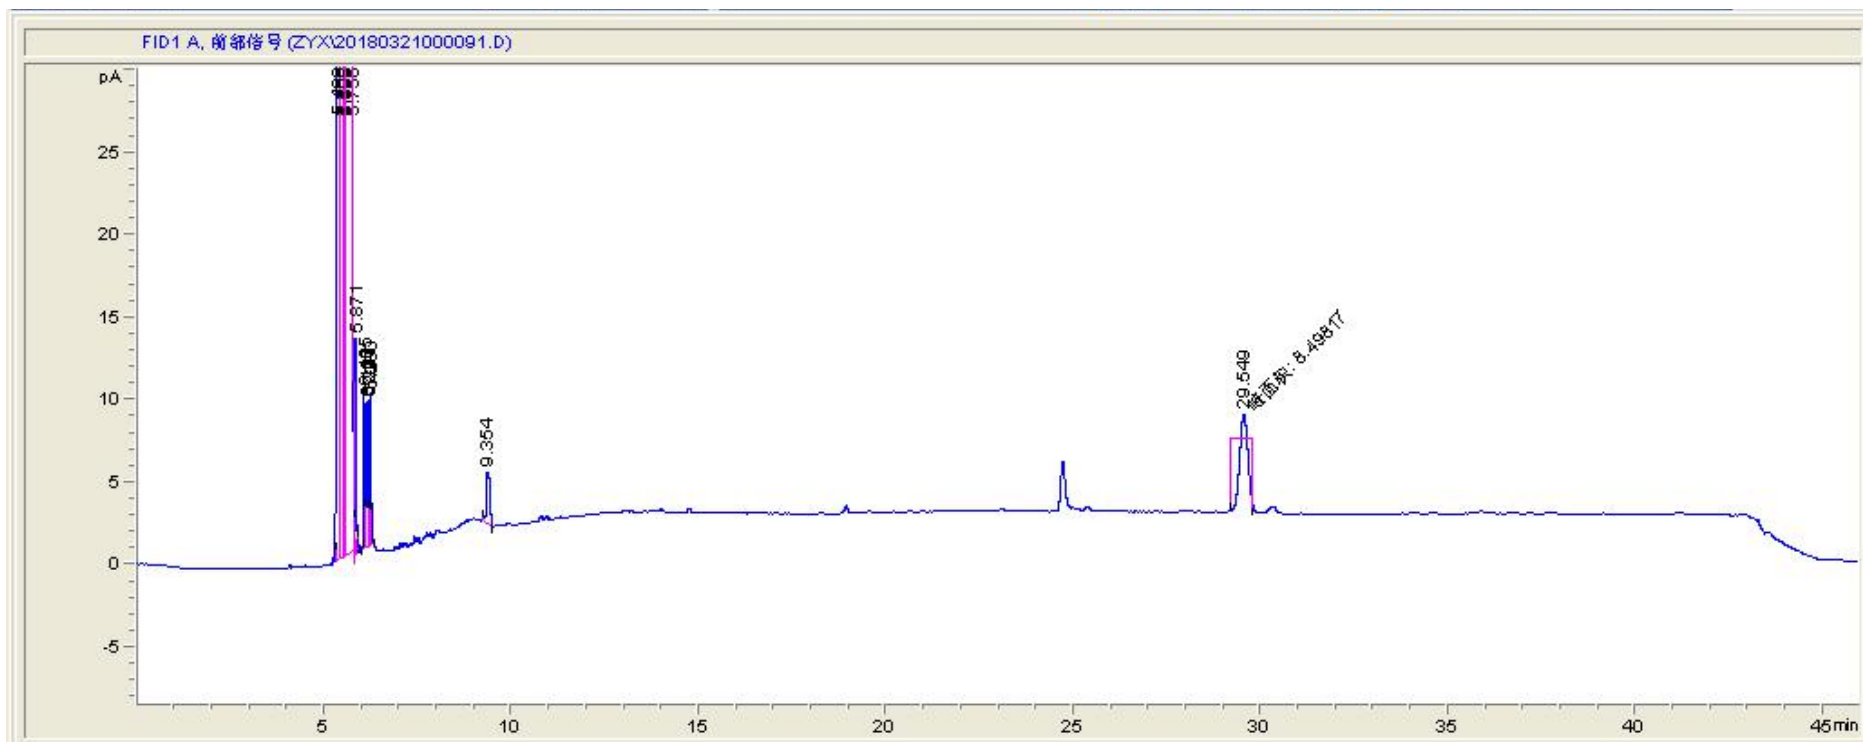

GC analysis of the sugar moiety of **10**

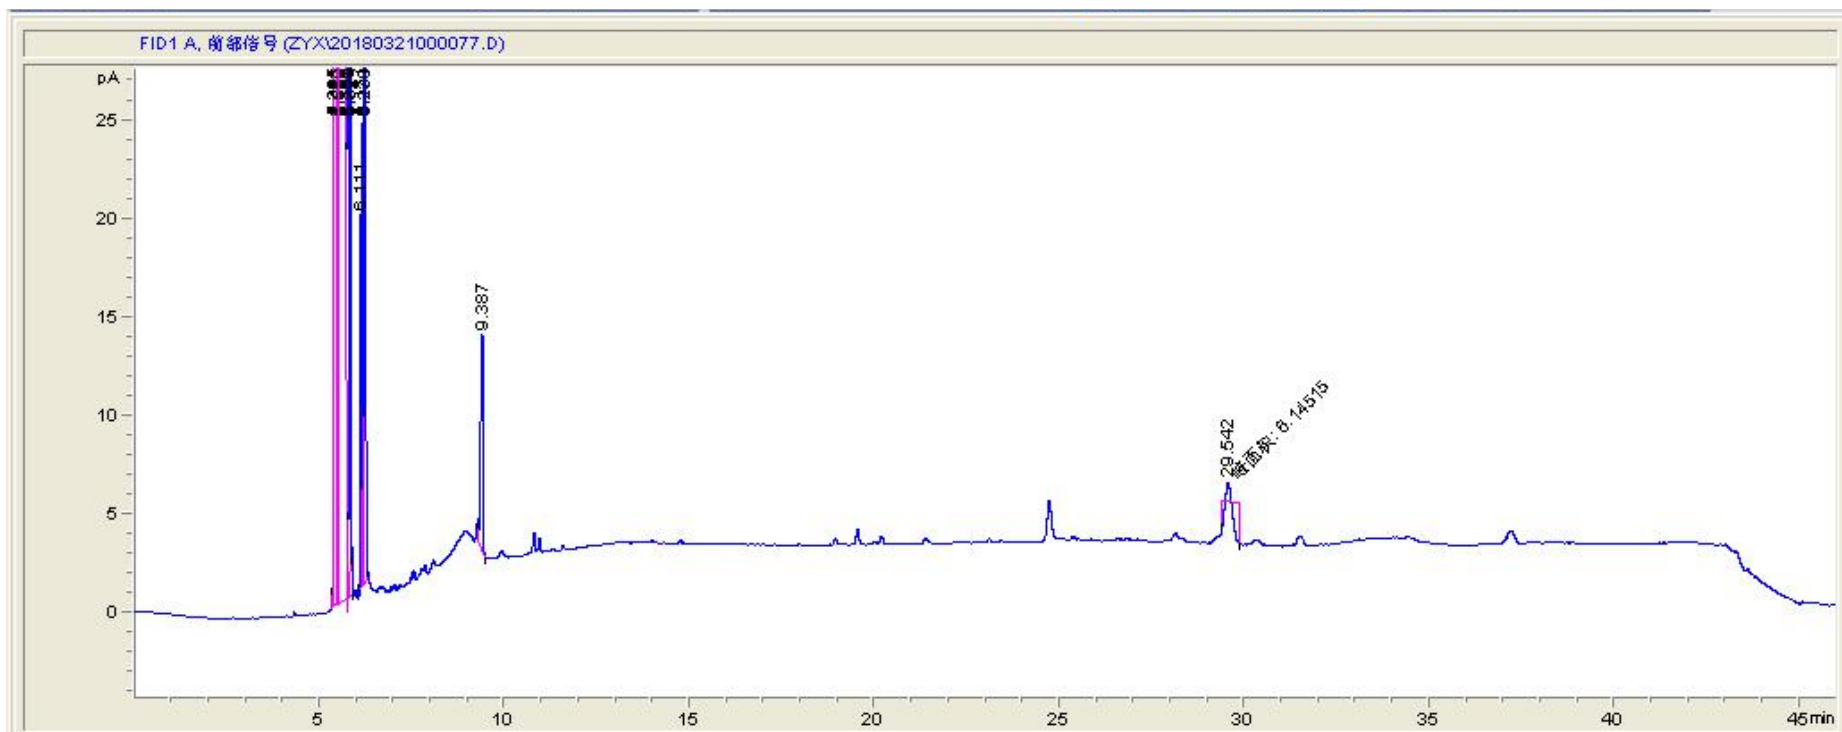

GC analysis of the sugar moiety of **13**



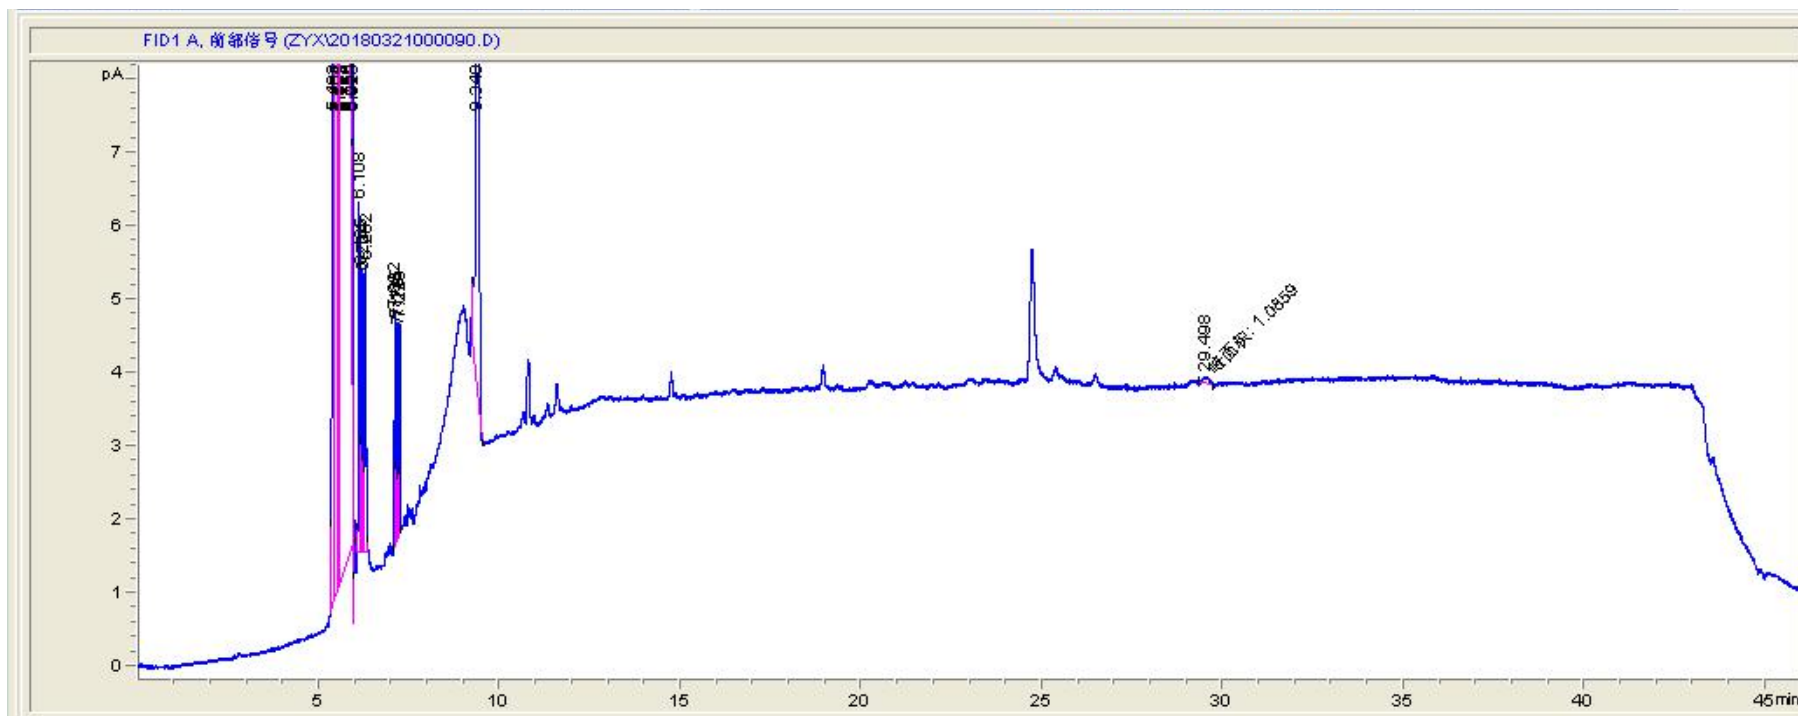

GC analysis of the sugar moiety of **14**

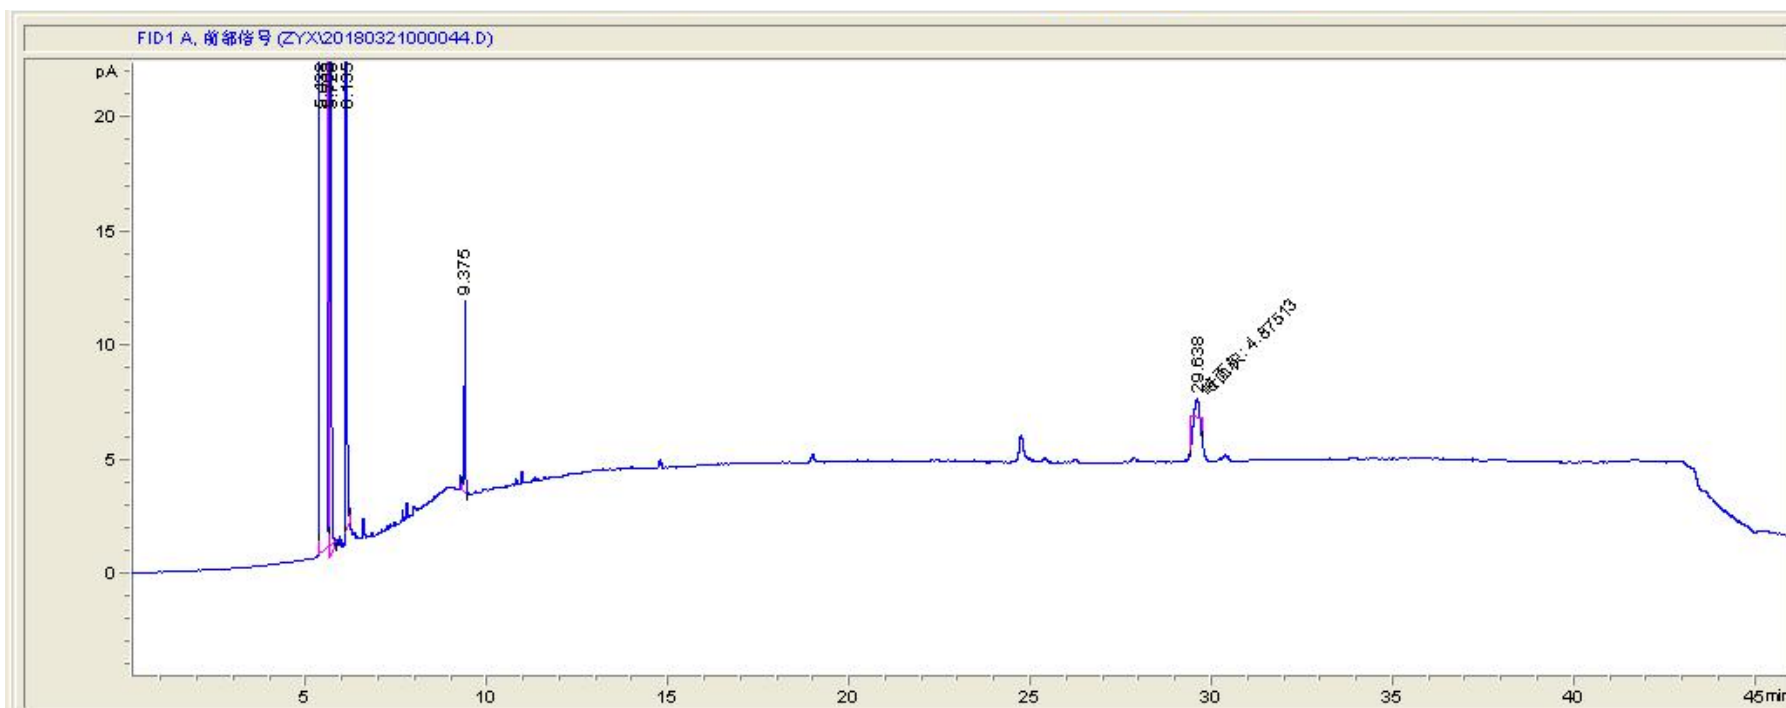

GC analysis of the sugar moiety of **15**

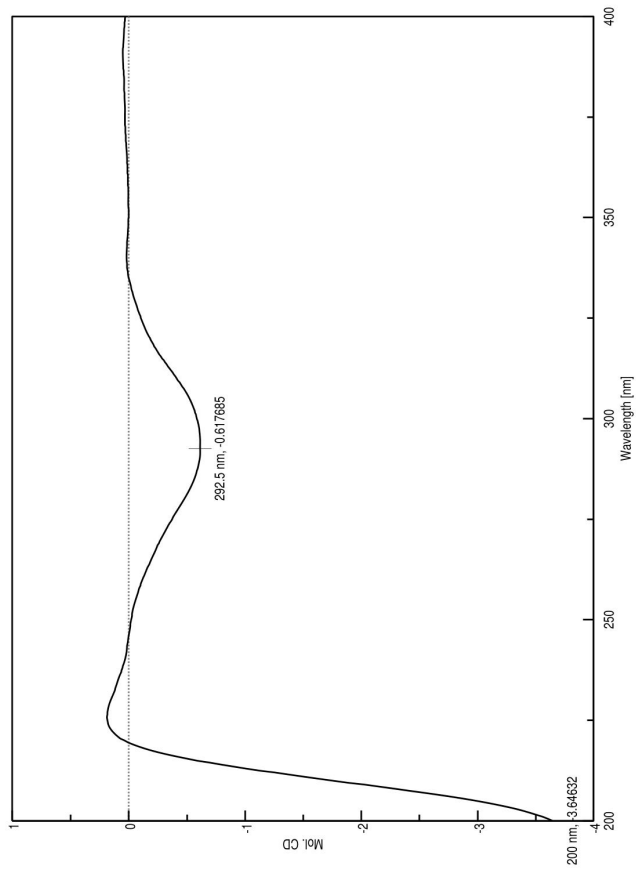

CD spectrum of 1

[Comments]  
 Sample name ZSB-68  
 Comment  
 [Measurement Information]  
 Measurement Name J-815  
 Concentration M875soft  
 Serial No. A024461168

Accessory Standard  
 Accessory S/N A024461168  
 Cell Length 1 mm

Measurement date 2018/12/11 16:03

Photometric Mode CD, HT, Abs  
 Measure Range 400 - 200 nm  
 Data pitch 0.5 nm  
 Sensitivity Standard  
 D.I.T. 1 sec  
 Bandwidth 1.00 nm  
 Start Mode Immediately  
 Scanning Speed 100 nm/min  
 Baseline Correction Baseline  
 Shutter Control Auto  
 CD Detector PMT  
 PMT Voltage Auto  
 Accumulations 2  
 Solvent MEOH  
 Concentration 0.5 (w/v)%

[Detailed Information]  
 Creation date 2018/12/12 15:27

Data array type Linear data array \* 3  
 Horizontal axis Wavelength [nm]  
 Vertical axis(1) Mol. CD  
 Vertical axis(2) HT [V]  
 Vertical axis(3) Abs  
 Start 400 nm  
 End 200 nm  
 Data interval 0.5 nm  
 Data points 401

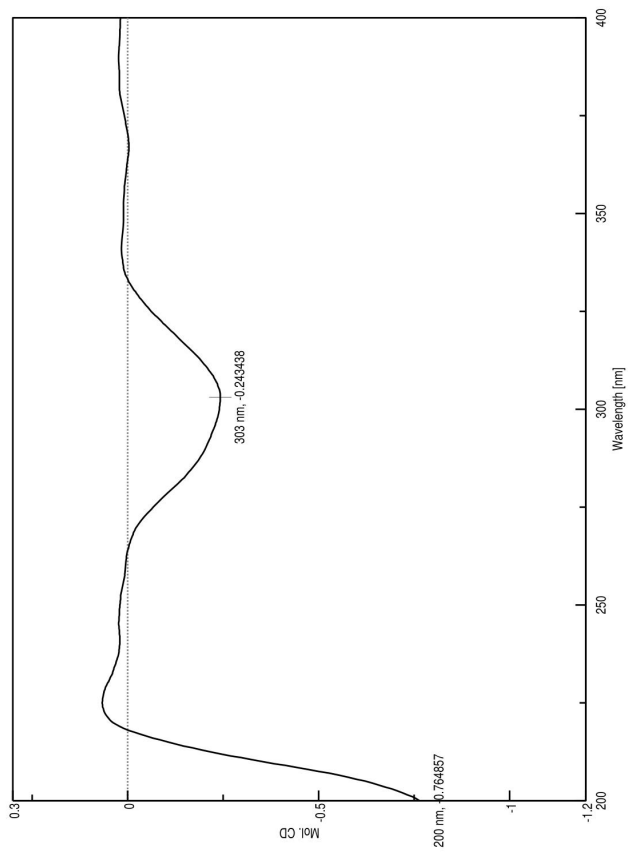

[Comments]  
 Sample name ZSB-55  
 Comment  
 [Measurement Information]  
 Measurement Name J-815  
 Operator Name MikrSoft  
 Serial No. A024461168

Accessory Standard  
 Accessory S/N A024461168  
 Cell Length 1 mm

Measurement date 2018/12/11 15:55

Photometric Mode CD, HT, Abs  
 Measure Range 400 - 200 nm  
 Data pitch 0.5 nm  
 Sensitivity Standard  
 D.I.T. 1 sec  
 Bandwidth 1.00 nm  
 Start Mode Immediately  
 Scanning Speed 100 nm/min  
 Baseline Correction Baseline  
 Shutter Control Auto  
 CD Detector PMT  
 PMT Voltage Auto  
 Accumulations 2  
 Solvent MEOH  
 Concentration 0.84 (w/v)%

[Detailed Information]  
 Creation date 2018/12/12 15:19

Data array type Linear data array \* 3  
 Horizontal axis Wavelength [nm]  
 Vertical axis(1) Mol. CD  
 Vertical axis(2) HT [V]  
 Vertical axis(3) Abs  
 Start 400 nm  
 End 200 nm  
 Data interval 0.5 nm  
 Data points 401

CD spectrum of 2

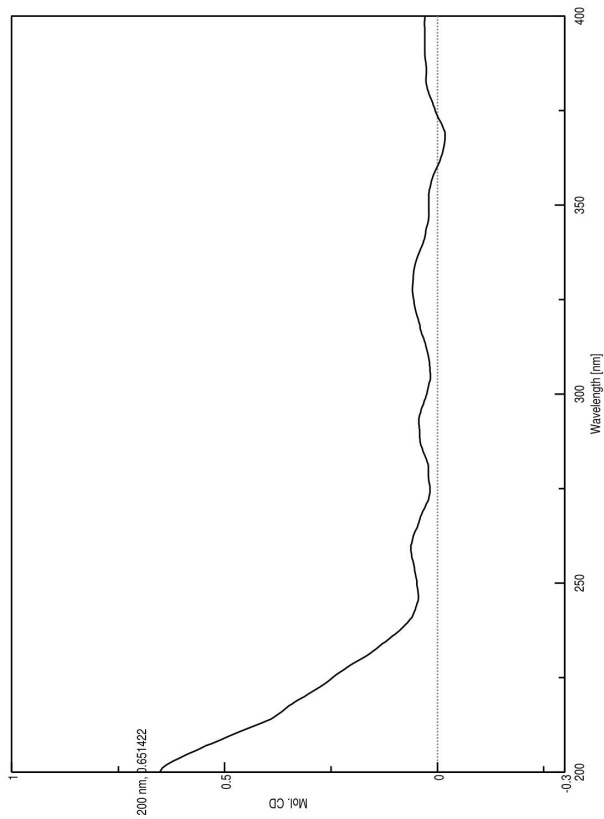

[Comments]  
 Sample name ZSB-161  
 Comment  
 Measurement Information  
 Measurement Name J-815  
 Operator MBT  
 Software MBR6soft  
 Serial No. A024461168

Accessory Standard  
 Accessory S/N A024461168  
 Cell Length 1 mm

Measurement date 2018/12/11 16:13

Photometric Mode CD, HT, Abs  
 Measure Range 400 - 200 nm  
 Data pitch 0.5 nm  
 Sensitivity Standard  
 D.I.T. 1 sec  
 Bandwidth 1.00 nm  
 Start Mode Immediately  
 Scanning Speed 100 nm/min  
 Baseline Correction Baseline  
 Shutter Control Auto  
 CD Detector PMT  
 PMT Voltage Auto  
 Accumulations 2  
 Solvent MEOH  
 Concentration 0.5 (w/v)%

[Detailed Information]  
 Creation date 2018/12/12 15:46  
 Data array type Linear data array \* 3  
 Horizontal axis Wavelength [nm]  
 Vertical axis(1) Melted CD  
 Vertical axis(2) HT [V]  
 Vertical axis(3) Abs  
 Start 400 nm  
 End 200 nm  
 Data interval 0.5 nm  
 Data points 401

—— ZSB-161-1-s-mj.ws

CD spectrum of 12

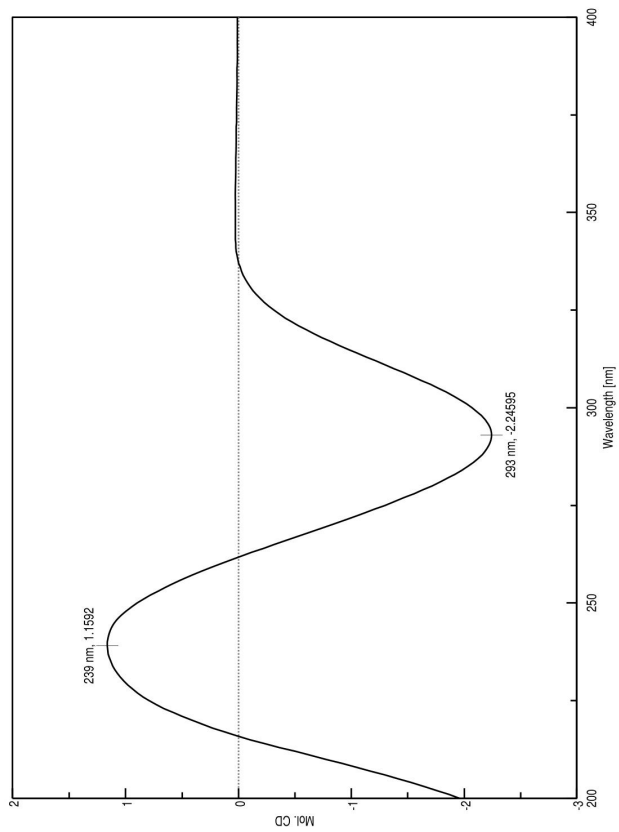

[Measurement Information] ZSB-52-1-s-m.jws

Instrument Name J-815  
 Model Name J-815  
 Serial No. A024461168

Accessory Standard  
 Accessory S/N A024461168  
 Cell Length 1 mm

Measurement date 2018/4/3 15:01

Photometric Mode CD, HT, Abs  
 Measure Range 400 - 200 nm  
 Data pitch 1 nm  
 Sensitivity Standard  
 D.I.T. 1 sec  
 Bandwidth 1.00 nm  
 Start Mode Immediately  
 Scanning Speed 100 nm/min  
 Baseline Correction Baseline  
 Shutter Control Auto  
 CD Detector PMT  
 PMT Voltage Auto  
 Accumulations 2  
 Solvent MEOH  
 Concentration 0.4 (w/v)%

CD spectrum of 15
